# Supplementary material
Source: PubMed Central journal article supplement (PMC3163120)
Supplement: NIHMS316331-supplement-10_si_010.pdf [file NIHMS316331-supplement-10_si_010.pdf]

Supporting Information for

## Phosphine-Catalyzed Annulations of Azomethine Imines: Allene-Dependent [3 + 2], [3 + 3], [4 + 3], and [3 + 2 + 3] Pathways

Risong Na,<sup>†</sup> Chengfeng Jing,<sup>†</sup> Qihai Xu,<sup>§</sup> Hui Jiang,<sup>†</sup> Xi Wu,<sup>†</sup> Jiayan Shi,<sup>†</sup> Jiangchun Zhong,<sup>†</sup>  
Min Wang,<sup>†</sup> Diego Benitez,<sup>‡</sup> Ekaterina Tkatchouk,<sup>‡</sup> William A. Goddard III,<sup>‡</sup>  
Hongchao Guo,<sup>\*,†</sup> and Ohyun Kwon<sup>\*,§</sup>

*Department of Applied Chemistry, China Agricultural University, Beijing 100193, P. R. China, Materials and Process Stimulation Center, California Institute of Technology, Pasadena, California 91125, and Department of Chemistry and Biochemistry, University of California, Los Angeles, California 90095-1569*

E-Mail: hchguo@gmail.com; ohyun@chem.ucla.edu

\* Author to whom correspondence should be addressed.

<sup>†</sup> China Agricultural University

<sup>‡</sup> California Institute of Technology

<sup>§</sup> University of California, Los Angeles

### Contents

|                                                                                                                                                                |           |
|----------------------------------------------------------------------------------------------------------------------------------------------------------------|-----------|
| General Information                                                                                                                                            | S2        |
| Preparation of Allenolates                                                                                                                                     | S2–S7     |
| Preparation of Azomethine Imines                                                                                                                               | S7–S8     |
| General Procedures for the [3 + 2], [3 + 3], and [4 + 3] Annulations                                                                                           | S8–S9     |
| Screening of Reaction Solvents                                                                                                                                 | S10       |
| General Procedure for Asymmetric [3 + 2] Annulation                                                                                                            | S11       |
| Characterization Data for the [3 + 2], [3 + 3], and [4 + 3] Cycloadducts ( <b>3–6</b> , <b>6'</b> )                                                            | S11–S32   |
| General Procedure for the [3 + 2 + 3] Annulations                                                                                                              | S33       |
| Characterization Data for the [3 + 2 + 3] Annulation Products ( <b>7</b> and <b>8</b> )                                                                        | S33–S47   |
| Mechanism of the [3 + 2 + 3] Annulation: An Alternative Route                                                                                                  | S48       |
| Transformations of the Cycloadducts                                                                                                                            | S48–S50   |
| ORTEP Representations of Products ( <b>3ad</b> , <b>3an</b> , <b>3ao</b> , <b>4</b> , <i>trans</i> - <b>5</b> , <b>6</b> , <b>7h</b> , <b>7i</b> , <b>8a</b> ) | S51–S55   |
| <sup>1</sup> H and <sup>13</sup> C NMR Spectra of All Cycloadducts; 2D NMR Spectra of <b>6'ap</b> and ( <i>Z</i> )- <b>3ba</b>                                 | S56–S122  |
| <sup>1</sup> H NMR Spectra from the Temperature Experiment for the Analysis of the Tautomeric Mixture of Compounds <b>7</b> and <b>8</b>                       | S123–S126 |
| <sup>1</sup> H and <sup>13</sup> C NMR Spectra of <b>9–12</b> ; 2D NMR Spectra of <b>9</b> , <b>11</b> and <b>12</b>                                           | S127–S142 |
| HPLC chromatograms of Racemic and Chiral [3+2] cycloadduct <b>3ba</b>                                                                                          | S143      |
| Computational Methods and XYZ Coordinates                                                                                                                      | S144–S151 |

## General Information

All reactions were performed under an Ar atmosphere in oven-dried glassware with magnetic stirring. Unless otherwise stated, all reagents were purchased from commercial suppliers and used without further purification. Dichloromethane employed in the reactions was freshly distilled from CaH<sub>2</sub>. Organic solutions were concentrated under reduced pressure using a rotary evaporator or oil pump. Reactions were monitored through thin-layer chromatography (TLC) on silica gel–precoated glass plates (SiliCycle silica gel; thickness: 0.25 mm). Chromatograms were visualized by fluorescence quenching under UV light at 254 nm. Flash column chromatography was performed using SiliCycle Silica-P Flash silica gel (60 Å pore size, 40–63 μm) or Qingdao Haiyang flash silica gel (200–300 mesh). Infrared spectra were recorded using a Bruker Optics TENSOR 27 instrument. <sup>1</sup>H and <sup>13</sup>C NMR spectra were recorded in CDCl<sub>3</sub> using a Bruker Avance 500, ARX-500, ARX-400, or AV-300 spectrometer, as indicated. Chemical shifts (δ, ppm) are relative to tetramethylsilane (TMS) with the resonance of the non-deuterated solvent or TMS as the internal standard. <sup>1</sup>H NMR data are reported as follows: chemical shift, multiplicity (s = singlet; d = doublet; t = triplet; q = quartet; p = pentet; m = multiplet; br = broad), coupling constant (Hz), and integral. Data for <sup>13</sup>C NMR spectra are reported in terms of chemical shift. Accurate mass measurements were performed using an Agilent instrument with the ESI-MS technique and samples dissolved in CHCl<sub>3</sub>. Data were analyzed using instrument-supplied software. X-ray crystallographic data were collected using a Bruker SMART CCD-based diffractometer equipped with a low-temperature apparatus operated at 100 K.

## Preparation of Allenates

Ethyl 2,3-butadienoate (**2o**), α-alkylallenates (**2a–2n**), and γ-substituted allenates (**2p–2r**) were prepared using either a literature method<sup>1</sup> or a one-pot procedure developed in this laboratory from commercially available (carbethoxymethylene)triphenylphosphorane,<sup>2</sup> except for **2d** and **2e**.

---

<sup>1</sup> (a) Lang, R. W.; Hansen, H.-J. *Org. Synth.* **1984**, *62*, 202. (b) Lu, K.; Kwon, O. *Org. Synth.* **2009**, *86*, 212.

<sup>2</sup> (a) Buono, G. *Tetrahedron Lett.* **1972**, *13*, 3257. (b) Zhu, X.-F.; Lan, J.; Kwon, O. *J. Am. Chem. Soc.* **2003**, *125*, 4716.

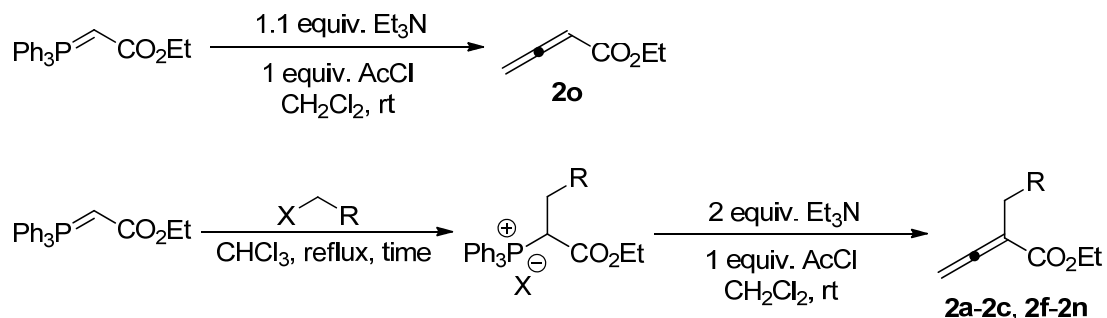

**Ethyl 2,3-Butadienoate (2o).** Triethylamine (14.8 mL, 0.105 mol) was added slowly to a stirred solution of (carbethoxymethylene)triphenylphosphorane (34.8 g, 0.1 mol)<sup>1a</sup> in DCM (300 mL)/pentane (100 mL) at 0 °C under Ar. AcCl (6.9 mL, 0.1 mol) was then added dropwise over 1 h using a syringe pump. The resulting orange/yellow suspension was stirred at 0 °C for 1 h and then overnight at room temperature. The suspension was filtered through silica gel in a Buchner funnel and concentrated (rotary evaporator) at 0 °C. Pentane (300 mL) was added to the residue and the mixture stirred for 30 min. The triphenylphosphine oxide was filtered off and the solution concentrated (rotary evaporator) at 0 °C. The residue was distilled under reduced pressure to give the product as a colorless liquid (46%).

**General Procedure for the Synthesis of the Alleneoates 2a–2c and 2f–2n.** The pertinent alkyl halide (1.0 – 1.2 equiv) was added to a stirred solution of (carbethoxymethylene)triphenylphosphorane<sup>1a</sup> in CHCl<sub>3</sub> (80 mL) at room temperature. The mixture was heated under reflux until all of the (carbethoxymethylene)triphenylphosphorane had disappeared (monitored using TLC or <sup>1</sup>H NMR). The solvent was evaporated under reduced pressure. DCM (100 mL) and triethylamine (8.4 mL, 2.2 equiv) were added to the resulting phosphonium salt. After stirring for 1 h, AcCl (1.96 mL, 1.0 equiv) was added dropwise over 30 min using a syringe pump. The mixture was stirred overnight and then passed through a Buchner funnel packed with silica gel and washed several times with DCM. The combined filtrates were carefully concentrated and the residue subjected to a flash column chromatography (eluent: 10–15% EtOAc in hexanes) to afford the corresponding alleneoates **2a–2c** and **2f–2n** in 50–85% yield. Spectroscopic data of previously unknown alleneoates are provided.

### Ethyl 2-Allyl-2,3-butadienoate (**2l**)

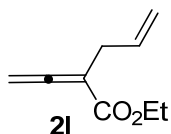

The general procedure outlined above was followed (27.3 mmol scale, using 1.2 equiv of allyl bromide). Formation of the phosphonium salt took ca. 24 h. The allenoate **2l** (2.95 g, 19.16 mmol, 70%) was formed as a colorless oil. IR (neat)  $\nu_{\max}$  3080, 2983, 1967, 1941, 1718, 1641, 1255, 1127, 1071  $\text{cm}^{-1}$ ;  $^1\text{H}$  NMR (400 MHz,  $\text{CDCl}_3$ )  $\delta$  5.85–5.73 (m, 1H), 5.12–5.00 (m, 4H), 4.18 (q,  $J = 7.20$  Hz, 2H), 2.98–2.95 (m, 2H), 1.25 (t,  $J = 7.20$  Hz, 3H);  $^{13}\text{C}$  NMR (75 MHz,  $\text{CDCl}_3$ )  $\delta$  213.9, 167.7, 134.8, 116.3, 98.9, 79.1, 77.1, 61.0, 32.7, 14.2; HRMS (EI) calcd for  $\text{C}_9\text{H}_{11}\text{O}_2$   $[(\text{M} - \text{H})^+]$  151.0759, found 151.0763.

### Ethyl 5-Phenyl-2-vinylidenepent-4-enoate (**2m**)

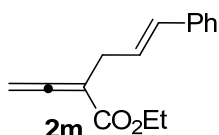

The general procedure outlined above was followed (27.3 mmol scale, using 1.2 equiv of cinnamyl bromide). Formation of the phosphonium salt took ca. 12 h. The allenoate **2m** (4.70 g, 20.45 mmol, 75%) was formed as a yellow oil. IR (neat)  $\nu_{\max}$  3060, 3027, 2982, 1966, 1941, 1709, 1255, 1099, 965  $\text{cm}^{-1}$ ;  $^1\text{H}$  NMR (300 MHz,  $\text{CDCl}_3$ )  $\delta$  7.51–7.32 (m, 5H), 6.62 (d,  $J = 15.9$  Hz, 1H), 6.43–6.33 (m, 1H), 5.31 (t,  $J = 2.9$  Hz, 2H), 4.37 (q,  $J = 7.2$  Hz, 2H), 3.33–3.28 (m, 2H), 1.44 (t,  $J = 7.2$  Hz);  $^{13}\text{C}$  NMR (75 MHz,  $\text{CDCl}_3$ )  $\delta$  214.1, 166.9, 137.4, 131.7, 128.5, 128.4, 127.2, 126.7, 126.2, 99.2, 79.5, 77.1, 61.2, 32.1, 14.3; HRMS (EI) calcd for  $\text{C}_{15}\text{H}_{16}\text{O}_2$   $[\text{M}^+]$  228.1150, found 228.1153.

### Preparation of Allenoate **2d**

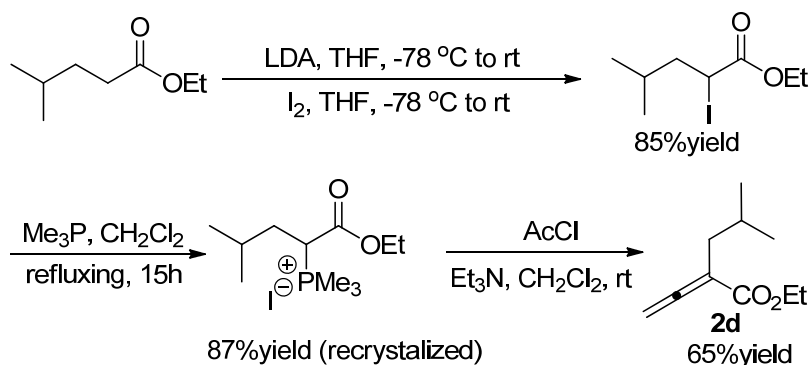

**Ethyl 2-Iodo-4-methylpentanoate.** *n*-BuLi (2 M in pentane, 25 mL, 50 mmol) was added dropwise to a stirred solution of diisopropylamine (6.95 mL, 50 mmol) in dry THF (25 mL) at –20 °C; the mixture was then stirred for 0.5 h at –78 °C. Ethyl isocaproate (8.29 mL, 50 mmol) was added dropwise over a period of 5 min to the resulting solution; the mixture was warmed to room temperature and the solution of the ester enolate was withdrawn and added dropwise, via syringe, to a solution of I<sub>2</sub> (15.2 g, 60 mmol, 20% excess) in THF (50 mL) maintained at dry ice–acetone temperatures. Conc. HCl (10 mL) was injected and the solution warmed to room temperature before being extracted with water (2 × 30 mL) containing sufficient sodium thiosulfate to remove the I<sub>2</sub> color, dried (MgSO<sub>4</sub>), and concentrated to give the crude product, which was purified through flash column chromatography (hexane/EtOAc), giving the product as a yellow oil (11.5 g, 85%). <sup>1</sup>H NMR (400 MHz, CDCl<sub>3</sub>) δ 0.85 (d, *J* = 5.6 Hz, 3H), 0.93 (d, *J* = 6.4 Hz, 3H), 1.27 (t, *J* = 7.2 Hz, 3H), 1.62–1.68 (m, 2H), 4.16–4.22 (m, 2H), 4.34 (t, *J* = 7.6 Hz, 1H); <sup>13</sup>C NMR (100 MHz, CDCl<sub>3</sub>) δ 13.8, 20.2, 21.6, 22.1, 28.3, 44.6, 61.7, 171.6.

**Ethyl 2-Isobutyl-2,3-butadienoate (2d).** Me<sub>3</sub>P (3.1 mL, 30.2 mmol) was added dropwise over 5 min to a stirred solution of ethyl 2-iodo-4-methylpentanoate (6.81 g, 25.2 mmol) in DCM (50 mL). The mixture was stirred for 12 h under reflux, cooled to room temperature, and then concentrated to give the phosphonium iodide as a white solid. This solid was kept under high vacuum for 2 h and then recrystallized (hexanes and a minimal amount of DCM) to afford (1-ethoxy-4-methyl-1-oxopentan-2-yl)trimethylphosphonium iodide as a white solid (7.6 g, 87%). IR (film)  $\nu_{\max}$  3423, 2955, 2271, 2073, 1730, 1638, 1320, 1252, 1160, 968 cm<sup>-1</sup>; <sup>1</sup>H NMR (300 MHz, CDCl<sub>3</sub>) δ 4.30 (qd, *J* = 7.2, 1.8 Hz, 2H), 3.89 (td, *J* = 11.7, 2.6 Hz, 1H), 2.32 (d, *J* = 11.7 Hz, 9H), 1.98–1.86 (m, 1H), 1.80–1.51 (m, 2H), 1.34 (t, *J* = 7.2 Hz, 3H), 1.02 (t, *J* = 6.9 Hz, 6H); <sup>13</sup>C NMR (75 MHz, CDCl<sub>3</sub>) δ 168.2, 77.1, 63.2, 40.6, 39.9, 34.4, 27.3, 23.0, 21.3, 14.2, 8.7, 7.9.

Et<sub>3</sub>N (6.71 mL, 48.2 mmol) was added dropwise over 5 min to a solution of (1-ethoxy-4-methyl-1-oxopentan-2-yl)trimethylphosphonium iodide (7.6 g, 21.9 mmol) in DCM (50 mL) and then the mixture was stirred for 1 h. AcCl (1.71 mL, 24.1 mmol) was added dropwise (syringe pump) over 30 min. The resulting mixture was stirred overnight at room temperature and then concentrated. The residue was diluted with Et<sub>2</sub>O (50 mL) and passed through a pad of celite under reduced pressure. The filtrate was concentrated and the residue purified through flash column chromatography (hexane/EtOAc, 50:1) to afford **2d** as a colorless oil (2.39 g, 65%). IR (neat)  $\nu_{\max}$  2958, 2871, 1967, 1941, 1715, 1466, 1368, 1254, 1135, 1061 cm<sup>-1</sup>; <sup>1</sup>H NMR (400 MHz, CDCl<sub>3</sub>) δ 0.88 (d, *J* = 6.6 Hz, 6H), 1.25 (t, *J* = 7.1 Hz, 3H), 1.71–1.79 (m, 1H), 2.06–2.09 (m, 2H), 4.16 (q, *J* = 7.1 Hz, 2H), 5.06–5.07 (m, 2H); <sup>13</sup>C NMR (100 MHz, CDCl<sub>3</sub>) δ 14.2, 22.2, 27.3, 37.4, 60.9, 78.1, 99.1, 167.4, 214.4.

### Preparation of the Allenolate 2e

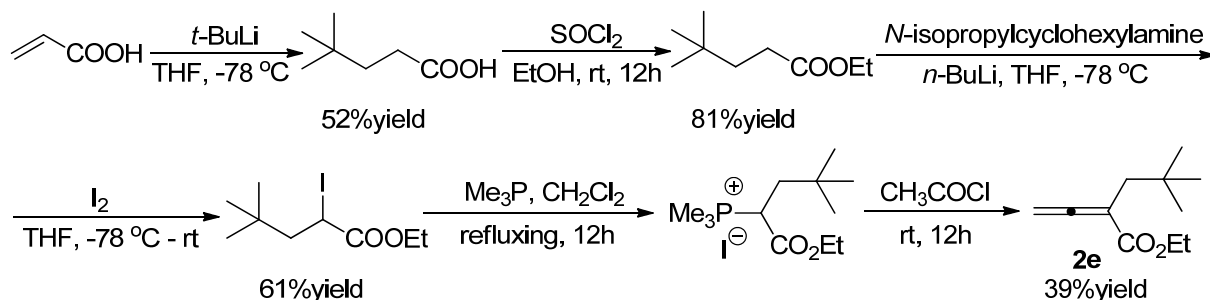

**4,4-Dimethylpentanoic Acid.**<sup>3</sup> A solution of *t*-BuLi (1.7 M in pentane, 84 mL, 135–150 mmol) was added slowly, via syringe, to a stirred solution of acrylic acid (67.5 mmol) in THF (600 mL) at  $-78\text{ }^\circ\text{C}$  and then the solution was stirred for 2 h at the same temperature. Water (200 mL) was added and then most of the solvent was evaporated under reduced pressure. The mixture was acidified through the slow addition of conc. HCl under stirring and ice water cooling. The aqueous phase was saturated with NaCl and extracted with EtOAc. The combined organic layers were dried ( $\text{Na}_2\text{SO}_4$ ). The crude acid obtained after evaporation of the solvent was purified through distillation under reduced pressure to give a colorless oil (4.6 g, 52%).  $^1\text{H}$  NMR (400 MHz,  $\text{CDCl}_3$ )  $\delta$  0.90 (s, 9H), 1.54–1.58 (m, 2H), 2.30–2.34 (m, 2H), 11.4 (broad s, 1H);  $^{13}\text{C}$  NMR (100 MHz,  $\text{CDCl}_3$ ):  $\delta$  29.0, 29.95, 30.04, 38.3, 181.3.

**Ethyl 4,4-Dimethylpentanoate.**  $\text{SOCl}_2$  (0.048 mol) was added dropwise to a stirred solution of 4,4-dimethylpentanoic acid (0.04 mol) in dry EtOH (100 mL) at  $0\text{ }^\circ\text{C}$ . After stirring at room temperature for 12 h, the mixture was concentrated and purified through flash chromatography ( $\text{SiO}_2$ ; EtOAc/hexane) to afford the ester as a colorless oil (5.1 g, 81%).  $^1\text{H}$  NMR (400 MHz,  $\text{CDCl}_3$ )  $\delta$  0.88 (s, 9H), 1.25 (t,  $J = 7.2\text{ Hz}$ , 3H), 1.52–1.56 (m, 3H), 2.23–2.28 (m, 2H), 4.11 (q,  $J = 7.2\text{ Hz}$ , 2H);  $^{13}\text{C}$  NMR (100 MHz,  $\text{CDCl}_3$ )  $\delta$  14.2, 29.0, 30.2, 32.1, 38.6, 60.2, 174.5.

**Ethyl 2-Iodo-4,4-dimethylpentanoate.**<sup>4</sup> *n*-BuLi (2.56 M in hexane, 9.88 mL, 25.28 mmol) was added dropwise to a stirred solution of *N*-isopropylcyclohexylamine (4.2 mL, 25.28 mmol) in dry THF (60 mL) at  $-20\text{ }^\circ\text{C}$  and then the mixture was stirred for 0.5 h at  $-78\text{ }^\circ\text{C}$ . Ethyl 4,4-dimethylpentanoate (4.0 g, 25.28 mmol) was added dropwise over a period of 5 min to the resulting solution. The mixture was then warmed to room temperature and the solution of the ester enolate was withdrawn and added dropwise, via syringe, to a solution of  $\text{I}_2$  (7.72 g, 30.32 mmol, 20% excess) in THF (60 mL) maintained at dry ice–acetone temperatures. Conc. HCl (5.6

<sup>3</sup> Aurell, M. J.; Domingo, L. R.; Mestres, R.; Muñoz, E.; Zaragoza, R. J. *Tetrahedron* **1999**, *55*, 815.

<sup>4</sup> Rathke, M. W.; Lindert, A. *Tetrahedron Lett.* **1971**, *43*, 3995.

mL) was injected and the solution warmed to room temperature; it was then extracted with water (2 × 30 mL) containing sufficient sodium thiosulfate to remove the I<sub>2</sub> color, dried (MgSO<sub>4</sub>), and concentrated to give the crude product, which was purified through flash column chromatography (hexane/EtOAc) to give the product as a yellow oil (4.4 g, 61%). IR (neat)  $\nu_{\max}$  2957, 2908, 2870, 1733, 1476, 1447, 1396, 1368, 1352, 1326, 1280, 1245, 1214, 1195, 1154, 1114, 1097, 1063, 1047, 1028, 1011, 853, 793, 743 cm<sup>-1</sup>; <sup>1</sup>H NMR (400 MHz, CDCl<sub>3</sub>)  $\delta$  0.87 (s, 9H), 1.26 (t, *J* = 7.2 Hz, 3H), 1.94 (dd, *J* = 2.8, 14.4 Hz, 1H), 2.46 (dd, *J* = 2.8, 14.4 Hz, 1H), 4.14–4.20 (m, 2H), 4.40 (dd, *J* = 2.8, 11.6 Hz, 1H); <sup>13</sup>C NMR (100 MHz, CDCl<sub>3</sub>)  $\delta$  13.7, 16.7, 28.9, 33.4, 50.4, 61.7, 172.5; MS (EI): 57.2, 73.1, 83.2, 101.1 (100), 142.2, 157.2, 239.1, 284.1 [M].

**Ethyl 4,4-Dimethyl-2-vinylidenepentanoate (2e).** Me<sub>3</sub>P (2.24 mL, 25.3 mmol) was added dropwise over 5 min to a stirred solution of ethyl 2-iodo-4,4-dimethylpentanoate (6.0 g, 21.1 mmol) in DCM (50 mL) and then the mixture was stirred for 12 h under reflux. After cooling, the mixture was concentrated to give the phosphonium iodide as a white solid, which was kept under high vacuum for 2 h and then dissolved in DCM (50 mL). Et<sub>3</sub>N (6.5 mL, 46.41 mmol) was added dropwise over 5 min and then the mixture was stirred for an additional 1 h. AcCl (1.66 mL, 23.20 mmol) was added dropwise (syringe pump) over 1 h. The resulting mixture was stirred overnight at room temperature and then concentrated. The residue was diluted with Et<sub>2</sub>O (50 mL) and passed through a pad of celite under reduced pressure. The filtrate was concentrated and the residue purified through gravity column chromatography (pentane/ether, 100:1) to afford the product as a colorless oil (1.5 g, 39%). IR (neat)  $\nu_{\max}$  2958, 2869, 1965, 1941, 1715, 1476, 1466, 1446, 1393, 1366, 1312, 1260, 1214, 1161, 1091, 1033, 909, 842, 792, 674 cm<sup>-1</sup>; <sup>1</sup>H NMR (400 MHz, CDCl<sub>3</sub>)  $\delta$  0.88 (s, 9H), 1.25 (t, *J* = 7.2 Hz, 3H), 2.17 (t, *J* = 2.0 Hz, 2H), 4.17 (q, *J* = 7.2 Hz, 2H), 5.05 (t, *J* = 1.6 Hz, 2H); <sup>13</sup>C NMR (100 MHz, CDCl<sub>3</sub>)  $\delta$  14.2, 29.1, 32.5, 41.3, 61.0, 77.5, 97.7, 167.7, 215.6; MS (EI): 41.2, 57.2, 98.1 (100), 99.1, 126.2, 135.2, 137.2, 139.2, 141.2, 153.2, 154.2, 167.2, 168.2, 182.2 [M], 183.2 [M + H]<sup>+</sup>.

### Preparation of *N, N'*-Cyclic Azomethine Imines 1

All *N, N'*-cyclic azomethine imines were prepared using the reported procedure (Method A) or a modified procedure (Method B) from the corresponding aldehydes.<sup>5</sup> Aromatic imines are tolerant

---

<sup>5</sup> (a) Shintani, R.; Fu, G. C. *J. Am. Chem. Soc.* **2003**, *125*, 10778. (b) Suárez, A.; Downey, C. W.; Fu, G. C. *J. Am. Chem. Soc.* **2005**, *127*, 11244. (c) Shintani, R.; Hayashi, T. *J. Am. Chem. Soc.* **2006**, *128*, 6330.

to water and flash column chromatography, but aliphatic imines are sensitive to moisture and decompose on silica gel. Therefore, whereas the aromatic *N,N'*-cyclic azomethine imines could be prepared using either Method A or B, the aliphatic imines could be prepared only using Method A.

**Method A** (reported procedure)<sup>5</sup>

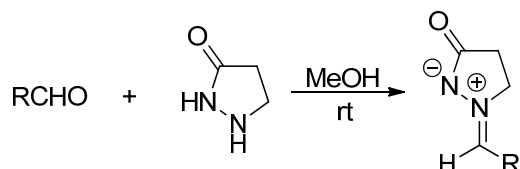

The aldehyde (5 mmol) was added to a solution of pyrazolidin-3-one (5 mmol) in MeOH (1 mL). The resulting mixture was stirred for 1–24 h (depending on TLC monitor) at room temperature and then diluted with Et<sub>2</sub>O (20 mL). The precipitate was filtered off, washed with Et<sub>2</sub>O, and dried under vacuum to afford the corresponding azomethine imine as a solid (40–90%).

**Method B** (modified procedure)

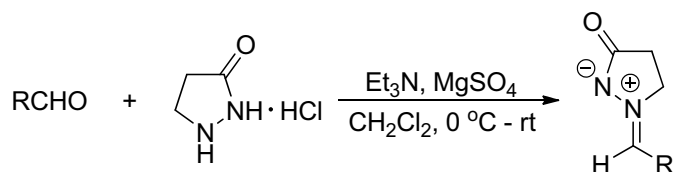

Et<sub>3</sub>N (5 mmol) was added dropwise to a stirred mixture of pyrazolidin-3-one hydrochloride (2.5 mmol), MgSO<sub>4</sub> (1.5 g), and DCM (15 mL) at 0 °C. The resulting mixture was stirred for 10 min and then the aldehyde (3.75 mmol) was added at 0 °C. The mixture was stirred at room temperature for 48 h and then the MgSO<sub>4</sub> was filtered off. The filtrate was washed successively with water (2 × 5 mL) and sat. NaCl (5 mL), dried (Na<sub>2</sub>SO<sub>4</sub>), filtered, and concentrated. The residue was purified through flash column chromatography (MeOH/EtOAc) to give the corresponding imine as a solid (30–80%).

**General Procedure for the [3 + 2], [3 + 3], and [4 + 3] Annulations of Azomethine Imines 1 and Allenates 2**

The phosphine (0.025 mmol) was added to a solution of the azomethine imine (0.125 mmol), the allenolate (0.15 mmol), and DCM (5–8 mL) at room temperature in an oven-dried 15-mL Schlenk tube. The mixture was stirred at room temperature (or the given temperature) for the given time



and then concentrated. The residue was purified through flash column chromatography (EtOAc/hexane) to afford the corresponding cycloaddition product.

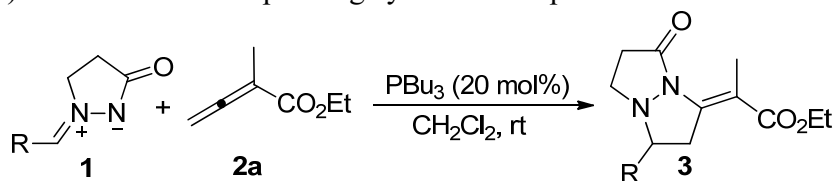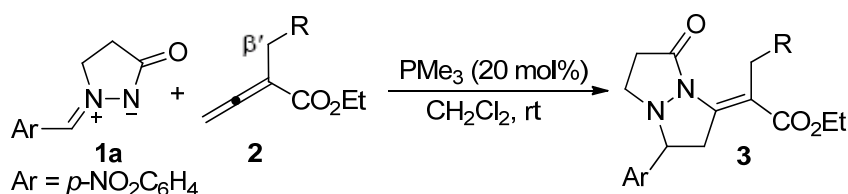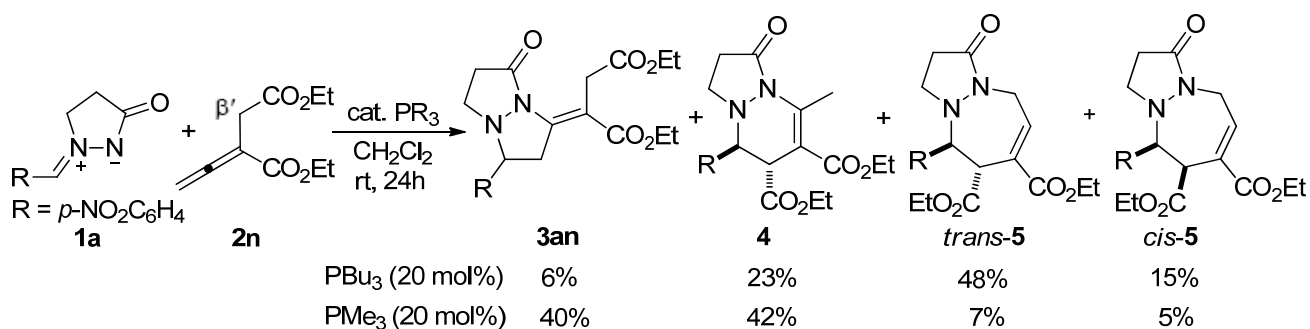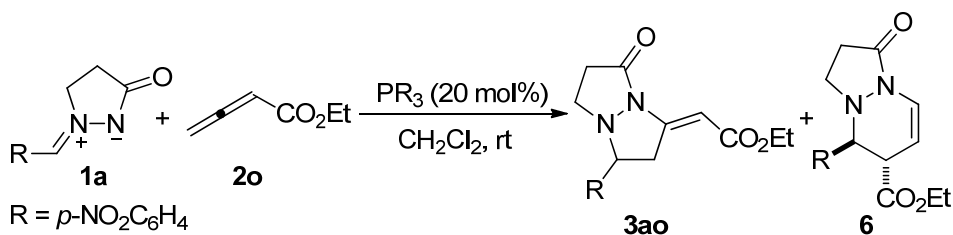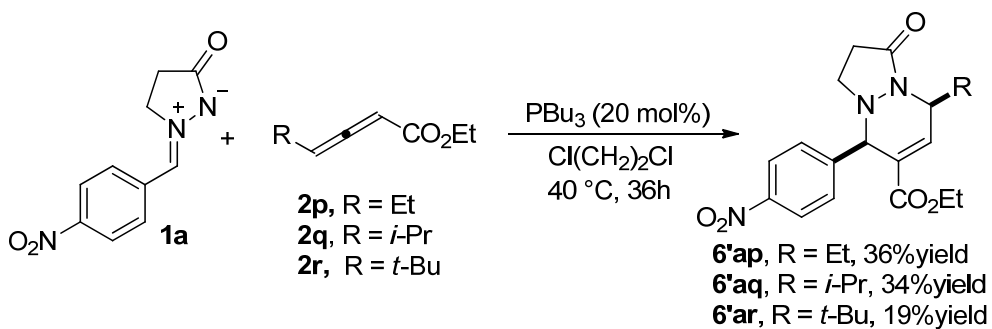

## Screening of Reaction Solvents

**Table S1.** Phosphine-Catalyzed [3 + 2] Cycloadditions of the Azomethine Imine **1a** and the Allenolate **2a**: Screening Solvents<sup>a</sup>

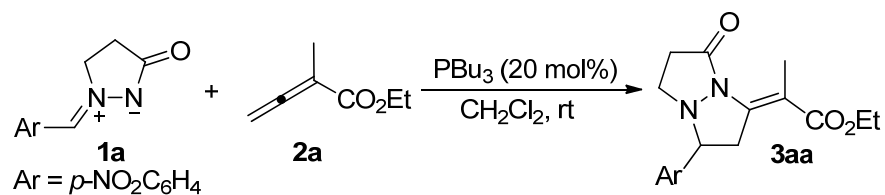

| entry | solvent                             | time (h) | yield (%) <sup>b</sup> |
|-------|-------------------------------------|----------|------------------------|
| 1     | DCM                                 | 14       | 88                     |
| 2     | $\text{CHCl}_3$                     | 24       | 71                     |
| 3     | $\text{Cl}(\text{CH}_2)_2\text{Cl}$ | 24       | 59                     |
| 4     | $\text{Et}_2\text{O}$               | 24       | 3                      |
| 5     | THF                                 | 24       | 4                      |
| 6     | toluene                             | 24       | 12                     |
| 7     | benzene                             | 24       | 10                     |
| 8     | MeCN                                | 24       | 4                      |
| 9     | EtOAc                               | 24       | 6                      |
| 10    | acetone                             | 24       | 5                      |
| 11    | DMF                                 | 24       | trace                  |
| 12    | MeOH                                | 24       | 0                      |

<sup>a</sup> 1.2 equiv. of the allenolate was used. <sup>b</sup> Isolated yields.

## General Procedure for Asymmetric [3 + 2] Annulation of Azomethine Imine **1b** and Allenates **2a**

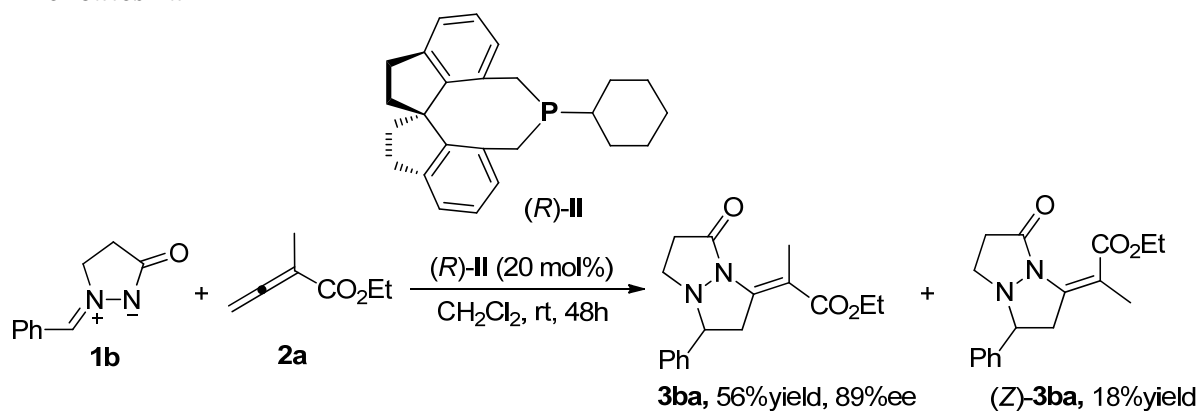

The phosphine  $(R)\text{-II}$  (0.020 mmol) was added to a solution of the azomethine imine (0.10 mmol), the allenate (0.15 mmol), and DCM (1 mL) at room temperature in an oven-dried 5 mL Schlenk tube. The mixture was stirred at room temperature for 48h and then concentrated. The residue was purified through flash column chromatography (EtOAc/hexane = 1 : 2) to afford the corresponding cycloaddition product **3ba** in 56% yield and 89% ee, and  $(Z)\text{-3ba}$  in 18% yield. The enantiomer excess was determined by HPLC analysis on a chiral stationary phase (chiral column:  $(R, R)\text{-DACH DNB 5/100}$ ; eluent: DCM 40%, hexane 60%; flow rate: 1.0 mL/min).

## Characterization Data for the [3 + 2], [3 + 3] and [4 + 3] Annulation Products **3–6**, and **6'**

### $(E)$ -Ethyl 2-(3-(4-Nitrophenyl)-7-oxotetrahydropyrazolo[1,2-a]pyrazol-1(5H)-ylidene)propanoate (**3aa**)

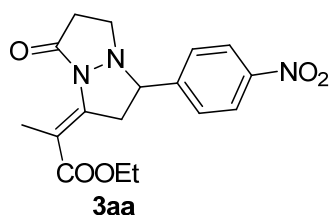

92% yield; pale-yellow solid. IR (film)  $\nu_{\text{max}}$  3078, 2981, 2930, 1729, 1649, 1604, 1522, 1493, 1445, 1420, 1348, 1096, 1059, 1016, 980, 767, 736, 700, 669, 577  $\text{cm}^{-1}$ ;  $^1\text{H}$  NMR (400 MHz,  $\text{CDCl}_3$ )  $\delta$  1.26 (t,  $J = 7.1$  Hz, 3H), 2.07–2.08 (m, 3H), 2.74–2.90 (m, 2H), 2.94–3.05 (m, 2H), 3.60–3.68 (m, 1H), 3.78–3.91 (m, 2H), 4.16 (q,  $J = 7.1$  Hz, 2H), 7.58 (d,  $J = 8.7$  Hz, 2H), 8.23 (d,  $J = 8.7$  Hz, 2H);  $^{13}\text{C}$  NMR (100 MHz,  $\text{CDCl}_3$ )  $\delta$  14.3, 17.0, 31.4, 43.9, 45.6, 60.5, 68.4, 114.1, 124.1, 128.4, 142.5, 145.6, 147.9, 167.6, 171.8; HRMS (ESI) calcd for  $\text{C}_{17}\text{H}_{20}\text{N}_3\text{O}_5^+$  [ $\text{M} + \text{H}$ ] $^+$  346.1397, found 346.1396.

**(E)-Ethyl 2-(3-(4-Nitrophenyl)-7-oxotetrahydropyrazolo[1,2-a]pyrazol-1(5H)-ylidene)butanoate (3ab)**

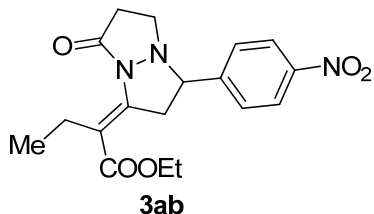

96% yield; pale-yellow solid. IR (film)  $\nu_{\max}$  3078, 2891, 2931, 1729, 1649, 1604, 1522, 1445, 1420, 1348, 1096, 1059, 1016, 980, 767, 736, 700, 669, 577  $\text{cm}^{-1}$ ;  $^1\text{H}$  NMR (400 MHz,  $\text{CDCl}_3$ )  $\delta$  1.14 (t,  $J = 7.3$  Hz, 3H), 1.28 (t,  $J = 7.1$  Hz, 3H), 2.47–2.68 (m, 2H), 2.73–3.04 (m, 4H), 3.59–3.66 (m, 1H), 3.75–3.88 (m, 2H), 4.19 (q,  $J = 7.1$  Hz, 2H), 7.59 (d,  $J = 8.7$  Hz, 2H), 8.24 (d,  $J = 8.7$  Hz, 2H);  $^{13}\text{C}$  NMR (125 MHz,  $\text{CDCl}_3$ )  $\delta$  13.6, 14.1, 24.2, 31.2, 43.8, 45.2, 60.3, 67.9, 120.5, 124.0, 128.2, 141.3, 145.5, 147.8, 167.4, 171.6; HRMS (ESI) calcd for  $\text{C}_{18}\text{H}_{22}\text{N}_3\text{O}_5^+$   $[\text{M} + \text{H}]^+$  360.1554, found 360.1549.

**(E)-Ethyl 2-(3-(4-Nitrophenyl)-7-oxotetrahydropyrazolo[1,2-a]pyrazol-1(5H)-ylidene)pentanoate (3ac)**

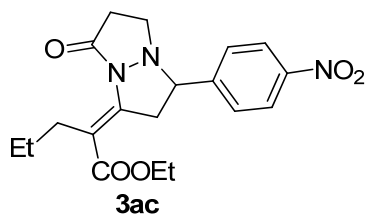

92% yield; pale-yellow solid. IR (film)  $\nu_{\max}$  2960, 2871, 1730, 1644, 1606, 1522, 1493, 1463, 1420, 1347, 1286, 1223, 1156, 1109, 1072, 1036, 866, 786, 750, 700  $\text{cm}^{-1}$ ;  $^1\text{H}$  NMR (400 MHz,  $\text{CDCl}_3$ )  $\delta$  0.92 (t,  $J = 7.3$  Hz, 3H), 1.25 (t,  $J = 7.1$  Hz, 3H), 1.39–1.66 (m, 2H), 2.44–2.60 (m, 2H), 2.72–2.90 (m, 2H), 2.94–3.03 (m, 2H), 3.57–3.65 (m, 1H), 3.75 (dd,  $J = 18.1, 7.7$  Hz, 1H), 3.86 (dd,  $J = 10.0, 7.9$  Hz, 1H), 4.16 (q,  $J = 7.1$  Hz, 2H), 7.58 (d,  $J = 8.7$  Hz, 2H), 8.21 (d,  $J = 8.7$  Hz, 2H);  $^{13}\text{C}$  NMR (100 MHz,  $\text{CDCl}_3$ )  $\delta$  14.2, 14.3, 22.4, 31.4, 32.8, 44.0, 45.4, 60.4, 68.0, 119.2, 124.0, 128.4, 141.6, 145.7, 147.9, 167.6, 171.6; HRMS (ESI) calcd for  $\text{C}_{19}\text{H}_{24}\text{N}_3\text{O}_5^+$   $[\text{M} + \text{H}]^+$  374.1710, found 374.1716.

**(E)-Ethyl 4-Methyl-2-(3-(4-nitrophenyl)-7-oxotetrahydropyrazolo[1,2-a]pyrazol-1(5H)-ylidene)pentanoate (3ad)**

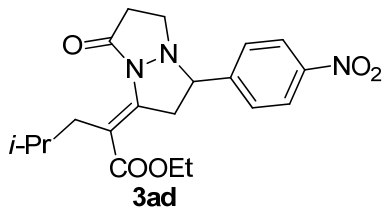

95% yield; pale-yellow solid. IR (film)  $\nu_{\max}$  2956, 2920, 2849, 1714, 1646, 1605, 1522, 1464, 1347, 1298, 1222, 1132, 1027, 856, 737, 700  $\text{cm}^{-1}$ ;  $^1\text{H}$  NMR (400 MHz,  $\text{CDCl}_3$ )  $\delta$  0.83 (d,  $J = 6.5$  Hz, 3H), 0.93 (d,  $J = 6.5$  Hz, 3H), 1.26 (t,  $J = 6.9$  Hz, 3H), 1.75–1.82 (m, 1H), 2.48–2.57 (m, 2H), 2.72–2.90 (m, 2H), 2.96–3.09 (m, 2H), 3.57–3.72 (m, 2H), 3.82–3.86 (m, 1H), 4.11–4.20 (m, 2H), 7.59 (d,  $J = 8.4$  Hz, 2H), 8.23 (d,  $J = 8.4$  Hz, 2H);  $^{13}\text{C}$  NMR (100 MHz,  $\text{CDCl}_3$ )  $\delta$  14.2, 21.7, 23.2, 28.1, 31.4, 39.0, 44.0, 45.4, 60.4, 67.9, 118.3, 124.0, 128.4, 142.0, 145.6, 147.9, 167.8, 171.4; HRMS (ESI) calcd for  $\text{C}_{20}\text{H}_{26}\text{N}_3\text{O}_5^+$   $[\text{M} + \text{H}]^+$  388.1867, found 388.1874.

**(E)-Ethyl 4,4-Dimethyl-2-(3-(4-nitrophenyl)-7-oxotetrahydropyrazolo[1,2-a]pyrazol-1(5H)-ylidene)pentanoate (3ae)**

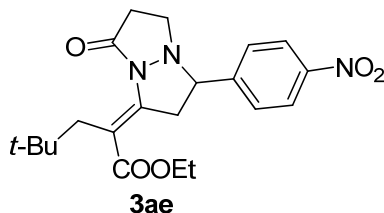

98% yield; pale-yellow solid. IR (film)  $\nu_{\max}$  3058, 2958, 1714, 1465, 1605, 1520, 1493, 1475, 1421, 1346, 1178, 1081, 1052, 1030, 978, 908, 856, 828, 788, 737, 701  $\text{cm}^{-1}$ ;  $^1\text{H}$  NMR (400 MHz,  $\text{CDCl}_3$ )  $\delta$  0.88 (s, 9H), 1.26 (t,  $J = 7.1$  Hz, 3H), 2.58 (d,  $J = 14.0$  Hz, 1H), 2.71–2.90 (m, 3H), 2.94–3.01 (m, 1H), 3.17 (dd,  $J = 18.3, 10.5$  Hz, 1H), 3.55–3.62 (m, 2H), 3.80 (dd,  $J = 10.3, 7.6$  Hz, 1H), 4.14 (qd,  $J = 7.1, 1.8$  Hz, 2H), 7.59 (d,  $J = 8.7$  Hz, 2H), 8.22 (d,  $J = 8.7$  Hz, 2H);  $^{13}\text{C}$  NMR (100 MHz,  $\text{CDCl}_3$ )  $\delta$  14.1, 29.3, 31.7, 33.4, 41.4, 44.3, 45.5, 60.4, 67.7, 117.0, 123.9, 128.3, 141.8, 145.5, 147.8, 168.4, 170.2; HRMS (ESI) calcd for  $\text{C}_{21}\text{H}_{28}\text{N}_3\text{O}_5^+$   $[\text{M} + \text{H}]^+$  402.2023, found 402.2004.

**(E)-Ethyl 2-(3-(4-Nitrophenyl)-7-oxotetrahydropyrazolo[1,2-a]pyrazol-1(5H)-ylidene)-3-phenylpropanoate (3af)**

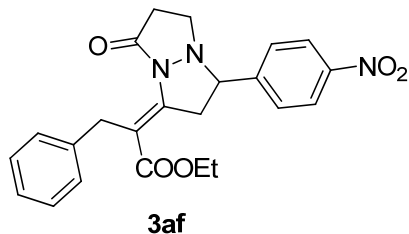

87% yield; pale-yellow solid. IR (film)  $\nu_{\max}$  3050, 3028, 2982, 2862, 1714, 1650, 1605, 1494, 1453, 1420, 1274, 1197, 1084, 1029, 978, 856, 833, 742, 670, 557  $\text{cm}^{-1}$ ;  $^1\text{H}$  NMR (400 MHz,  $\text{CDCl}_3$ )  $\delta$  1.07 (t,  $J = 7.1$  Hz, 3H), 2.74–2.93 (m, 2H), 3.00–3.16 (m, 2H), 3.60–3.68 (m, 1H), 3.78–3.94 (m, 3H), 3.99–4.13 (m, 3H), 7.15–7.27 (m, 5H), 7.61 (d,  $J = 8.7$  Hz, 2H), 8.25 (d,  $J = 8.7$  Hz, 2H);  $^{13}\text{C}$  NMR (125 MHz,  $\text{CDCl}_3$ )  $\delta$  13.8, 31.3, 36.1, 43.9, 45.4, 60.3, 68.0, 117.2, 124.0, 125.7, 127.9, 128.28, 128.33, 140.2, 142.7, 145.3, 147.9, 167.0, 171.8; HRMS (ESI) calcd for  $\text{C}_{23}\text{H}_{24}\text{N}_3\text{O}_5^+$   $[\text{M} + \text{H}]^+$  422.1710, found 422.1708.

**(E)-Ethyl 2-(3-(4-Nitrophenyl)-7-oxotetrahydropyrazolo[1,2-a]pyrazol-1(5H)-ylidene)-3-(o-tolyl)propanoate (3ag)**

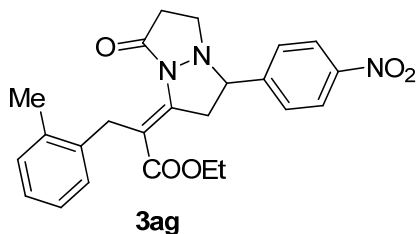

95% yield; pale-yellow solid. IR (film)  $\nu_{\max}$  2979, 1745, 1647, 1603, 1522, 1491, 1461, 1346, 1299, 1195, 1089, 1028, 855, 787, 739, 699, 669  $\text{cm}^{-1}$ ;  $^1\text{H}$  NMR (400 MHz,  $\text{CDCl}_3$ )  $\delta$  1.05 (t,  $J = 7.1$  Hz, 3H), 2.34 (s, 3H), 2.71–2.80 (m, 1H), 2.83–2.92 (m, 1H), 3.03 (ddd,  $J = 11.9, 9.5, 5.7$  Hz, 1H), 3.17 (dd,  $J = 18.2, 10.3$  Hz, 1H), 3.59–3.66 (m, 1H), 3.76–4.03 (m, 6H), 7.04–7.12 (m, 4H), 7.60–7.64 (m, 2H), 8.23–8.27 (m, 2H);  $^{13}\text{C}$  NMR (100 MHz,  $\text{CDCl}_3$ )  $\delta$  13.9, 19.7, 31.3, 33.7, 44.0, 45.4, 60.4, 68.0, 116.8, 124.1, 125.6, 125.9, 128.2, 128.4, 129.9, 136.2, 138.3, 142.9, 145.5, 148.0, 167.2, 172.2; HRMS (ESI) calcd for  $\text{C}_{24}\text{H}_{26}\text{N}_3\text{O}_5^+$   $[\text{M} + \text{H}]^+$  436.1867, found 436.1852.

**(E)-Ethyl 3-(2-Fluorophenyl)-2-(3-(4-nitrophenyl)-7-oxotetrahydropyrazolo[1,2-a]pyrazol-1(5H)-ylidene)propanoate (3ah)**

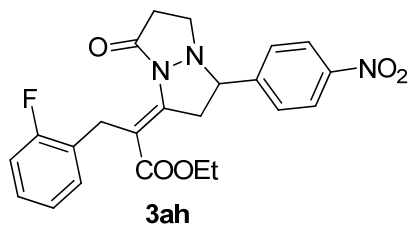

91% yield; pale-yellow solid. IR (film)  $\nu_{\max}$  2918, 2849, 1715, 1647, 1603, 1522, 1489, 1456, 1419, 1347, 1298, 1196, 1097, 1030, 856, 757, 699  $\text{cm}^{-1}$ ;  $^1\text{H}$  NMR (400 MHz,  $\text{CDCl}_3$ )  $\delta$  1.07 (td,  $J = 7.1, 2.0$  Hz, 3H), 2.74–2.93 (m, 2H), 2.99–3.15 (m, 2H), 3.60–3.68 (m, 1H), 3.81–4.10 (m, 6H), 6.83–7.23 (m, 4H), 7.59–7.63 (m, 2H), 8.22–8.26 (m, 2H);  $^{13}\text{C}$  NMR (100 MHz,  $\text{CDCl}_3$ )  $\delta$  13.88, 13.96, 29.39, 29.42, 31.50, 31.64, 36.05, 36.07, 44.12, 44.19, 45.58, 45.80, 60.50, 60.57, 68.07, 68.17, 115.46, 115.47, 116.50, 123.56, 123.59, 124.09, 124.12, 127.16, 127.31, 128.42, 142.96, 143.04, 143.46, 143.52, 145.31, 145.43, 147.96, 147.99, 159.78, 161.57, 162.22, 163.99, 166.92, 166.97, 171.58, 171.91; HRMS (ESI) calcd for  $\text{C}_{23}\text{H}_{23}\text{FN}_3\text{O}_5^+$   $[\text{M} + \text{H}]^+$  440.1616, found 440.1596.

**(E)-Ethyl 3-(4-Fluorophenyl)-2-(3-(4-nitrophenyl)-7-oxotetrahydropyrazolo[1,2-a]pyrazol-1(5H)-ylidene)propanoate (3ai)**

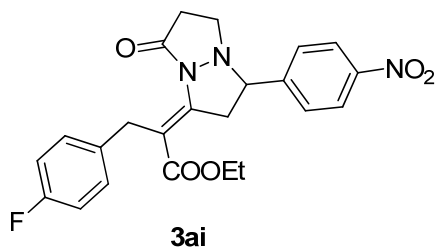

99% yield; pale-yellow solid. IR (film)  $\nu_{\max}$  2691, 1707, 1647, 1603, 1522, 1506, 1419, 1347, 1273, 1189, 1156, 1095, 1016, 856, 747, 699, 668  $\text{cm}^{-1}$ ;  $^1\text{H}$  NMR (400 MHz,  $\text{CDCl}_3$ )  $\delta$  1.07 (t,  $J = 7.1$  Hz, 3H), 2.73–2.93 (m, 2H), 3.00–3.13 (m, 2H), 3.60–3.67 (m, 1H), 3.79–3.85 (m, 2H), 3.90–3.94 (m, 1H), 3.98–4.05 (m, 3H), 6.92 (app. t,  $J = 8.7$  Hz, 2H), 7.14–7.18 (m, 2H), 7.60 (d,  $J = 8.7$  Hz, 2H), 8.23 (d,  $J = 8.7$  Hz, 2H);  $^{13}\text{C}$  NMR (100 MHz,  $\text{CDCl}_3$ )  $\delta$  14.0, 31.4, 35.5, 44.1, 45.5, 60.5, 68.0, 114.7, 114.9, 117.2, 124.1, 128.4, 129.8, 129.9, 135.92, 135.95, 143.0, 145.4, 148.0, 160.1, 162.5, 167.0, 172.0; HRMS (ESI) calcd for  $\text{C}_{23}\text{H}_{23}\text{FN}_3\text{O}_5^+$   $[\text{M} + \text{H}]^+$  440.1616, found 440.1595.

**(E)-Ethyl 3-(4-Chlorophenyl)-2-(3-(4-nitrophenyl)-7-oxotetrahydropyrazolo[1,2-a]pyrazol-1(5H)-ylidene)propanoate (3aj)**

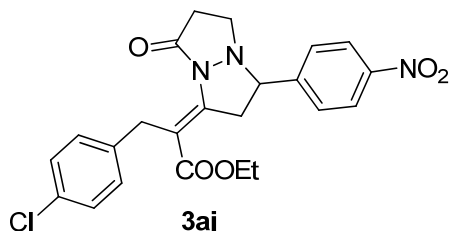

88% yield; pale-yellow solid. IR (film)  $\nu_{\max}$  2925, 2850, 1708, 1647, 1606, 1522, 1490, 1419, 1347, 1284, 1191, 1091, 1015, 866, 804, 736, 700  $\text{cm}^{-1}$ ;  $^1\text{H}$  NMR (400 MHz,  $\text{CDCl}_3$ )  $\delta$  1.08 (t,  $J$  = 7.1 Hz, 3H), 2.73–2.92 (m, 2H), 3.00–3.13 (m, 2H), 3.59–3.67 (m, 1H), 3.80–3.94 (m, 3H), 4.00–4.05 (m, 3H), 7.13 (d,  $J$  = 8.3 Hz, 2H), 7.21 (d,  $J$  = 8.3 Hz, 2H), 7.60 (d,  $J$  = 8.6 Hz, 2H), 8.23 (d,  $J$  = 8.6 Hz, 2H);  $^{13}\text{C}$  NMR (100 MHz,  $\text{CDCl}_3$ )  $\delta$  14.0, 31.5, 35.7, 44.1, 45.6, 60.6, 68.1, 116.7, 124.1, 128.1, 128.4, 129.9, 131.5, 138.9, 143.3, 145.3, 148.0, 166.9, 171.9; HRMS (ESI) calcd for  $\text{C}_{23}\text{H}_{23}\text{ClN}_3\text{O}_5^+$   $[\text{M} + \text{H}]^+$  456.1321, found 456.1304.

**(E)-Ethyl 3-(4-Bromophenyl)-2-(3-(4-nitrophenyl)-7-oxotetrahydropyrazolo[1,2-a]pyrazol-1(5H)-ylidene)propanoate (3ak)**

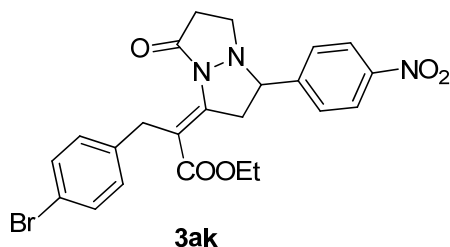

81% yield; pale-yellow solid. IR (film)  $\nu_{\max}$  2918, 2849, 1715, 1647, 1606, 1522, 1487, 1419, 1347, 1284, 1192, 1091, 1012, 856, 800, 736, 699  $\text{cm}^{-1}$ ;  $^1\text{H}$  NMR (400 MHz,  $\text{CDCl}_3$ )  $\delta$  1.08 (t,  $J$  = 7.1 Hz, 3H), 2.73–2.93 (m, 2H), 3.00–3.12 (m, 2H), 3.59–3.67 (m, 1H), 3.80–3.94 (m, 3H), 4.00–4.05 (m, 3H), 7.08 (d,  $J$  = 8.3 Hz, 2H), 7.36 (d,  $J$  = 8.4 Hz, 2H), 7.60 (d,  $J$  = 8.7 Hz, 2H), 8.24 (d,  $J$  = 8.7 Hz, 2H);  $^{13}\text{C}$  NMR (100 MHz,  $\text{CDCl}_3$ )  $\delta$  14.0, 31.5, 35.8, 44.1, 45.6, 60.6, 68.1, 116.6, 119.6, 124.1, 128.4, 130.3, 131.1, 139.4, 143.3, 145.3, 148.0, 166.9, 171.89; HRMS (ESI) calcd for  $\text{C}_{23}\text{H}_{23}\text{BrN}_3\text{O}_5^+$   $[\text{M} + \text{H}]^+$  500.0816, found 500.0796.



**(E)-Ethyl 2-(3-(4-Nitrophenyl)-7-oxotetrahydropyrazolo[1,2-a]pyrazol-1(5H)-ylidene)pent-4-enoate (3al)**

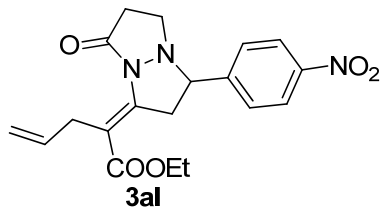

45% yield; pale-yellow solid. IR (film)  $\nu_{\max}$  2917, 2849, 1704, 1646, 1605, 1522, 1457, 1419, 1347, 1286, 1212, 1156, 1109, 1028, 856, 749, 700  $\text{cm}^{-1}$ ;  $^1\text{H}$  NMR (400 MHz,  $\text{CDCl}_3$ )  $\delta$  1.25 (t,  $J = 7.1$  Hz, 3H), 2.75–2.91 (m, 2H), 2.97–3.05 (m, 2H), 3.36 (ddd,  $J = 21.0, 15.3, 6.2$  Hz, 2H), 3.59–3.66 (m, 1H), 3.79–3.90 (m, 2H), 4.16 (q,  $J = 7.1$  Hz, 2H), 5.04 (ddd,  $J = 13.6, 11.5, 1.5$  Hz, 2H), 5.90 (ddt,  $J = 16.8, 10.1, 6.3$  Hz, 1H), 7.59 (d,  $J = 8.7$  Hz, 2H), 8.23 (d,  $J = 8.7$  Hz, 2H);  $^{13}\text{C}$  NMR (100 MHz,  $\text{CDCl}_3$ )  $\delta$  14.2, 31.6, 34.7, 44.1, 45.6, 60.6, 68.1, 115.6, 116.4, 124.1, 128.4, 142.4, 145.5, 148.0, 167.2, 171.4; HRMS (ESI) calcd for  $\text{C}_{19}\text{H}_{22}\text{N}_3\text{O}_5^+$   $[\text{M} + \text{H}]^+$  372.1554, found 372.1538.

**(2E,4E)-Ethyl 2-(3-(4-Nitrophenyl)-7-oxotetrahydropyrazolo[1,2-a]pyrazol-1(5H)-ylidene)-5-phenylpent-4-enoate (3am)**

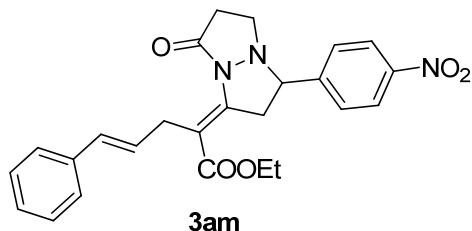

30% yield; pale-yellow solid. IR (film)  $\nu_{\max}$  2918, 2849, 1704, 1637, 1601, 1522, 1491, 1457, 1419, 1347, 1282, 1094, 968, 856, 744, 696  $\text{cm}^{-1}$ ;  $^1\text{H}$  NMR (400 MHz,  $\text{CDCl}_3$ )  $\delta$  1.26 (t,  $J = 7.1$  Hz, 3H), 2.77–2.93 (m, 2H), 2.99–3.09 (m, 2H), 3.45 (dd,  $J = 15.0, 6.0$  Hz, 1H), 3.54–3.68 (m, 2H), 3.82–3.91 (m, 2H), 4.17 (q,  $J = 7.0$  Hz, 2H), 6.30 (dt,  $J = 15.8, 6.6$  Hz, 1H), 6.45 (app. d,  $J = 15.9$  Hz, 1H), 7.19 (app. t,  $J = 7.2$  Hz, 1H), 7.26–7.36 (m, 4H), 7.60 (d,  $J = 8.7$  Hz, 2H), 8.24 (d,  $J = 8.7$  Hz, 2H);  $^{13}\text{C}$  NMR (125 MHz,  $\text{CDCl}_3$ )  $\delta$  14.2, 31.5, 34.0, 44.0, 45.5, 60.5, 68.0, 116.3, 124.0, 126.0, 126.8, 127.9, 128.27, 128.33, 131.1, 137.7, 142.4, 145.3, 147.8, 167.1, 171.4; HRMS (ESI) calcd for  $\text{C}_{25}\text{H}_{26}\text{N}_3\text{O}_5^+$   $[\text{M} + \text{H}]^+$  448.1867, found 448.1880.

**(E)-Diethyl 2-(3-(4-Nitrophenyl)-7-oxotetrahydropyrazolo[1,2-a]pyrazol-1(5H)-ylidene)succinate (3an)**

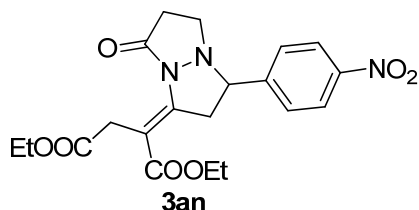

Pale-yellow solid. IR (film)  $\nu_{\max}$  2925, 2851, 1732, 1652, 1558, 1541, 1521, 1457, 1346, 1287, 1178, 855, 746  $\text{cm}^{-1}$ ;  $^1\text{H}$  NMR (400 MHz,  $\text{CDCl}_3$ )  $\delta$  1.25 (dt,  $J = 15.4, 7.1$  Hz, 6H), 2.84 (td,  $J = 8.0, 2.0$  Hz, 2H), 2.95–3.11 (m, 2H), 3.62 (ddd,  $J = 15.8, 12.6, 11.5$  Hz, 3H), 3.95 (ddd,  $J = 17.9, 14.1, 7.7$  Hz, 2H), 4.14–4.22 (m, 4H), 7.58–7.61 (m, 2H), 8.22–8.26 (m, 2H);  $^{13}\text{C}$  NMR (125 MHz,  $\text{CDCl}_3$ )  $\delta$  14.0, 14.1, 32.1, 36.6, 44.1, 46.4, 60.5, 60.6, 68.3, 110.2, 124.0, 128.2, 144.2, 145.0, 147.9, 166.5, 170.6, 171.3; HRMS (ESI) calcd for  $\text{C}_{20}\text{H}_{24}\text{N}_3\text{O}_7^+$   $[\text{M} + \text{H}]^+$  418.1609, found 418.1611.

**(E)-Ethyl 2-(3-(4-Nitrophenyl)-7-oxotetrahydropyrazolo[1,2-a]pyrazol-1(5H)-ylidene)acetate (3ao)**

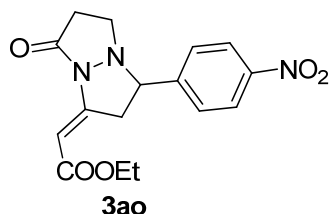

Pale-yellow solid. IR (film)  $\nu_{\max}$  2988, 2356, 2345, 1721, 1626, 1601, 1520, 1386, 1346, 1267, 1229, 1149, 1127, 1038, 860, 854, 839, 726, 680  $\text{cm}^{-1}$ ;  $^1\text{H}$  NMR (400 MHz,  $\text{CDCl}_3$ )  $\delta$  1.26 (t,  $J = 7.1$  Hz, 3H), 2.77–2.86 (m, 2H), 3.04–3.19 (m, 2H), 3.51 (t,  $J = 8.1$  Hz, 1H), 3.88 (dd,  $J = 11.7, 6.7$  Hz, 1H), 4.11–4.20 (m, 3H); 6.46 (s, 1H), 7.61 (d,  $J = 8.6$  Hz, 2H), 8.25 (d,  $J = 8.6$  Hz, 2H);  $^{13}\text{C}$  NMR (100 MHz,  $\text{CDCl}_3$ )  $\delta$  14.3, 37.1, 44.4, 51.8, 60.0, 69.5, 96.6, 96.7, 124.2, 128.0, 144.1, 144.2, 148.1, 164.6, 167.6; HRMS (ESI) calcd for  $\text{C}_{16}\text{H}_{18}\text{N}_3\text{O}_5^+$   $[\text{M} + \text{H}]^+$  332.1241, found 332.1225.

**(E)-Ethyl 2-(7-Oxo-3-phenyltetrahydropyrazolo[1,2-a]pyrazol-1(5H)-ylidene)propanoate (3ba)**

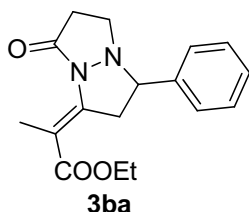

97% yield; pale-yellow solid. IR (film)  $\nu_{\max}$  2979, 2930, 1729, 1648, 1603, 1541, 1496, 1456, 1366, 1279, 1247, 1156, 1098, 1029, 978, 766, 701, 669  $\text{cm}^{-1}$ ;  $^1\text{H}$  NMR (400 MHz,  $\text{CDCl}_3$ )  $\delta$  1.26 (t,  $J = 7.1$  Hz, 3H), 2.08 (s, 3H), 2.70–2.88 (m, 2H), 3.00–3.10 (m, 2H), 3.53–3.61 (m, 1H), 3.71–3.78 (m, 2H), 4.17 (q,  $J = 7.1$  Hz, 2H), 7.31–7.38 (m, 5H);  $^{13}\text{C}$  NMR (100 MHz,  $\text{CDCl}_3$ )  $\delta$  14.3, 17.1, 31.5, 43.8, 45.1, 60.4, 69.4, 113.7, 127.6, 128.4, 128.8, 137.7, 143.6, 167.7, 172.2; HRMS (ESI) calcd for  $\text{C}_{17}\text{H}_{21}\text{N}_2\text{O}_3^+$   $[\text{M} + \text{H}]^+$  301.1547, found 301.1545.

**(Z)-Ethyl 2-(7-oxo-3-phenyltetrahydropyrazolo[1,2-a]pyrazol-1(5H)-ylidene)propanoate ((Z)-3ba)**

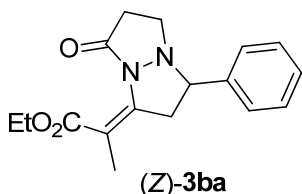

18% yield; pale-yellow solid. IR (film)  $\nu_{\max}$  2970, 2932, 1730, 1641, 1600, 1545, 1501, 1460, 1365, 1280, 1246, 1155, 1100, 1025, 980, 765, 703, 675  $\text{cm}^{-1}$ ;  $^1\text{H}$  NMR (400 MHz,  $\text{CDCl}_3$ )  $\delta$  1.23 (t,  $J = 7.2$  Hz, 3H), 1.84 (s, 3H), 2.70 (t,  $J = 8.4$  Hz, 2H), 2.78 (ddd,  $J = 1.2, 10.8, 16.8$  Hz, 1H), 2.91 (dt,  $J = 8.4, 11.6$  Hz, 1H), 3.19 (ddd,  $J = 1.2, 7.2, 16.8$  Hz, 1H), 3.50 (dt,  $J = 8.4, 11.6$  Hz, 1H), 3.65 (dd,  $J = 7.2, 10.8$  Hz, 1H), 4.11–4.24 (m, 2H), 7.25–7.37 (m, 5H);  $^{13}\text{C}$  NMR (75 MHz,  $\text{CDCl}_3$ )  $\delta$  14.28, 15.94, 32.31, 42.43, 46.58, 60.68, 69.66, 111.13, 127.57, 128.55, 128.91, 134.74, 137.42, 168.42, 169.00; HRMS (ESI) calcd for  $\text{C}_{17}\text{H}_{21}\text{N}_2\text{O}_3^+$   $[\text{M} + \text{H}]^+$  301.1552, found 301.1557.

**(E)-Ethyl 2-(7-Oxo-3-(*p*-tolyl)tetrahydropyrazolo[1,2-*a*]pyrazol-1(5*H*)-ylidene)propanoate (3ca)**

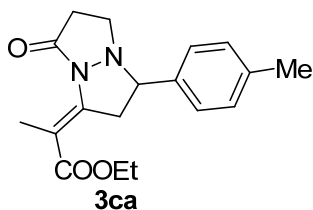

85% yield; pale-yellow solid. IR (film)  $\nu_{\max}$  2926, 1729, 1649, 1605, 1541, 1516, 1445, 1366, 1279, 1247, 1174, 1096, 1022, 820, 766, 736, 669, 562  $\text{cm}^{-1}$ ;  $^1\text{H}$  NMR (400 MHz,  $\text{CDCl}_3$ )  $\delta$  1.26 (t,  $J = 7.1$  Hz, 3H), 2.08 (s, 3H), 2.35 (s, 3H), 2.67–2.87 (m, 2H), 2.99–3.09 (m, 2H), 3.51–3.58 (m, 1H), 3.68–3.74 (m, 2H), 4.17 (q,  $J = 7.1$  Hz, 2H), 7.18 (d,  $J = 7.9$  Hz, 2H), 7.25–7.27 (m, 2H);  $^{13}\text{C}$  NMR (100 MHz,  $\text{CDCl}_3$ )  $\delta$  14.3, 17.1, 21.2, 31.5, 43.7, 45.0, 60.4, 69.2, 113.7, 127.6, 129.5, 134.6, 138.2, 143.7, 167.8, 172.2; HRMS (ESI) calcd for  $\text{C}_{18}\text{H}_{23}\text{N}_2\text{O}_3^+$   $[\text{M} + \text{H}]^+$  315.1703, found 315.1691.

**(E)-Ethyl 2-(3-(4-Isopropylphenyl)-7-oxotetrahydropyrazolo[1,2-*a*]pyrazol-1(5*H*)-ylidene)propanoate (3da)**

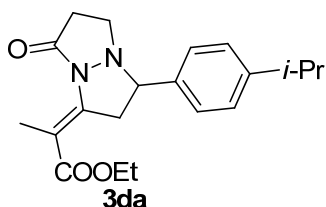

89% yield; pale-yellow solid. IR (film)  $\nu_{\max}$  2996, 1714, 1650, 1614, 1513, 1462, 1278, 1096, 1057, 1020, 978, 919, 836, 789, 767, 736, 702, 670, 574  $\text{cm}^{-1}$ ;  $^1\text{H}$  NMR (400 MHz,  $\text{CDCl}_3$ )  $\delta$  1.24–1.26 (m, 9H), 2.08 (app. t, 3H), 2.67–2.94 (m, 3H), 3.00–3.11 (m, 2H), 3.52–3.60 (m, 1H), 3.68–3.75 (m, 2H), 4.13–4.20 (m, 2H), 7.22 (d,  $J = 8.2$  Hz, 1H), 7.29 (d,  $J = 8.2$  Hz, 1H);  $^{13}\text{C}$  NMR (100 MHz,  $\text{CDCl}_3$ )  $\delta$  14.3, 17.1, 24.0, 31.5, 33.8, 43.7, 45.1, 60.4, 69.2, 113.7, 126.9, 127.6, 134.9, 143.7, 149.2, 167.8, 172.2; HRMS (ESI) calcd for  $\text{C}_{20}\text{H}_{27}\text{N}_2\text{O}_3^+$   $[\text{M} + \text{H}]^+$  343.2016, found 343.2008.

**(E)-Ethyl 2-(3-(4-Methoxyphenyl)-7-oxotetrahydropyrazolo[1,2-a]pyrazol-1(5H)-ylidene)propanoate (3ea)**

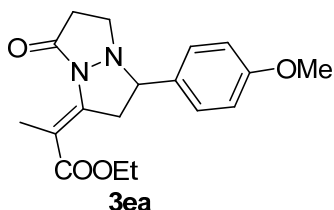

77% yield; pale-yellow solid. IR (film)  $\nu_{\max}$  3054, 2986, 2931, 2849, 1722, 1650, 1614, 1514, 1444, 1421, 1367, 1265, 1198, 1176, 1097, 1034, 896, 836  $\text{cm}^{-1}$ ;  $^1\text{H}$  NMR (400 MHz,  $\text{CDCl}_3$ )  $\delta$  1.26 (t,  $J = 7.1$  Hz, 3H), 2.07 (s, 3H), 2.70–2.87 (m, 2H), 2.98–3.09 (m, 2H), 3.49–3.57 (m, 1H), 3.66–3.73 (m, 2H), 3.81 (s, 3H), 4.17 (q,  $J = 7.1$  Hz, 2H), 6.88–6.91 (m, 2H), 7.27–7.31 (m, 2H);  $^{13}\text{C}$  NMR (100 MHz,  $\text{CDCl}_3$ )  $\delta$  14.3, 17.1, 31.5, 43.7, 44.8, 55.3, 60.4, 68.9, 113.7, 114.2, 128.8, 129.5, 143.7, 159.7, 167.8, 172.3; HRMS (ESI) calcd for  $\text{C}_{18}\text{H}_{23}\text{N}_2\text{O}_4^+$   $[\text{M} + \text{H}]^+$  331.1652, found 331.1645.

**(E)-Ethyl 2-(3-(4-Fluorophenyl)-7-oxotetrahydropyrazolo[1,2-a]pyrazol-1(5H)-ylidene)propanoate (3fa)**

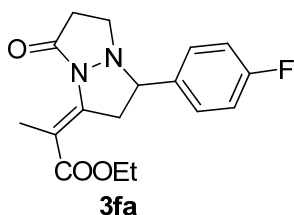

91% yield; pale-yellow solid. IR (film)  $\nu_{\max}$  2927, 1725, 1647, 1607, 1510, 1445, 1365, 1278, 1246, 1224, 1196, 1174, 1128, 1093, 1059, 1025, 979, 837, 809, 767, 701, 690, 683, 676  $\text{cm}^{-1}$ ;  $^1\text{H}$  NMR (400 MHz,  $\text{CDCl}_3$ )  $\delta$  1.25 (t,  $J = 7.1$  Hz, 3H), 2.06 (s, 3H), 2.71–2.86 (m, 2H), 2.94–3.09 (m, 3H), 3.52–3.58 (m, 1H), 3.69–3.75 (m, 2H), 4.16 (q,  $J = 7.1$  Hz, 2H), 7.03–7.10 (m, 2H), 7.33–7.36 (m, 2H);  $^{13}\text{C}$  NMR (100 MHz,  $\text{CDCl}_3$ )  $\delta$  14.3, 17.0, 31.5, 43.9, 45.1, 60.4, 68.6, 113.8, 115.6, 115.9, 129.1, 129.2, 133.51, 133.55, 143.3, 161.0, 164.3, 167.7, 172.0; HRMS (ESI) calcd for  $\text{C}_{17}\text{H}_{20}\text{FN}_2\text{O}_3^+$   $[\text{M} + \text{H}]^+$  319.1452, found 319.1448.

**(E)-Ethyl 2-(3-(4-Chlorophenyl)-7-oxotetrahydropyrazolo[1,2-a]pyrazol-1(5H)-ylidene)propanoate (3ga)**

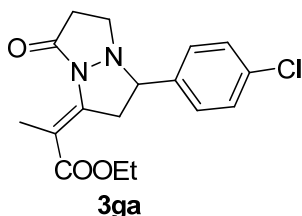

93% yield; pale-yellow solid. IR (film)  $\nu_{\max}$  2979, 2930, 1731, 1648, 1605, 1567, 1541, 1491, 1457, 1418, 1280, 1175, 1094, 1015, 832, 767, 737, 669  $\text{cm}^{-1}$ ;  $^1\text{H}$  NMR (400 MHz,  $\text{CDCl}_3$ )  $\delta$  1.26 (t,  $J = 7.1$  Hz, 3H), 2.07 (app. t, 3H), 2.70–2.88 (m, 2H), 2.93–3.06 (m, 2H), 3.53–3.61 (m, 1H), 3.70–3.77 (m, 2H), 4.17 (q,  $J = 7.1$  Hz, 2H), 7.30–7.36 (m, 4H);  $^{13}\text{C}$  NMR (100 MHz,  $\text{CDCl}_3$ )  $\delta$  14.3, 17.0, 31.4, 43.8, 45.2, 60.4, 68.6, 113.8, 128.91, 129.04, 134.2, 136.4, 143.2, 167.7, 172.0; HRMS (ESI) calcd for  $\text{C}_{17}\text{H}_{20}\text{ClN}_2\text{O}_3^+$   $[\text{M} + \text{H}]^+$  335.1157, found 335.1153.

**(E)-Ethyl 2-(3-(4-Bromophenyl)-7-oxotetrahydropyrazolo[1,2-a]pyrazol-1(5H)-ylidene)propanoate (3ha)**

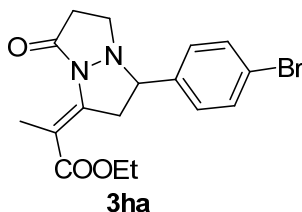

97% yield; pale-yellow solid. IR (film)  $\nu_{\max}$  2979, 2929, 1728, 1649, 1605, 1541, 1507, 1488, 1364, 1280, 1247, 1174, 1156, 1096, 1010, 828, 767, 669  $\text{cm}^{-1}$ ;  $^1\text{H}$  NMR (400 MHz,  $\text{CDCl}_3$ )  $\delta$  1.26 (t,  $J = 7.1$  Hz, 3H), 2.07 (app. d, 3H), 2.69–2.88 (m, 2H), 2.93–3.05 (m, 2H), 3.53–3.61 (m, 1H), 3.69–3.77 (m, 2H), 4.16 (q,  $J = 7.1$  Hz, 2H), 7.24–7.28 (m, 2H), 7.48–7.51 (m, 2H);  $^{13}\text{C}$  NMR (100 MHz,  $\text{CDCl}_3$ )  $\delta$  14.3, 17.0, 31.4, 43.8, 45.2, 60.5, 68.7, 113.9, 122.3, 129.2, 132.0, 136.9, 143.2, 167.7, 172.0; HRMS (ESI) calcd for  $\text{C}_{17}\text{H}_{20}\text{BrN}_2\text{O}_3^+$   $[\text{M} + \text{H}]^+$  379.0652, found 379.0668.

**(E)-Ethyl 2-(3-(4-Cyanophenyl)-7-oxotetrahydropyrazolo[1,2-a]pyrazol-1(5H)-ylidene)propanoate (3ia)**

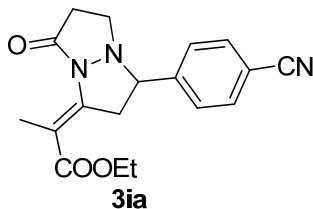

87% yield; pale-yellow solid. IR (film)  $\nu_{\max}$  2929, 1729, 1650, 1610, 1506, 1445, 1417, 1366, 1280, 1249, 1175, 1097, 1022, 842, 767, 736  $\text{cm}^{-1}$ ;  $^1\text{H}$  NMR (400 MHz,  $\text{CDCl}_3$ )  $\delta$  1.26 (t,  $J = 7.1$  Hz, 3H), 2.07 (s, 3H), 2.73–3.04 (m, 4H), 3.58–3.66 (m, 1H), 3.75–3.85 (m, 2H), 4.16 (q,  $J = 7.1$  Hz, 2H), 7.51 (d,  $J = 8.3$  Hz, 2H), 7.67 (d,  $J = 8.3$  Hz, 2H);  $^{13}\text{C}$  NMR (100 MHz,  $\text{CDCl}_3$ )  $\delta$  14.3, 17.0, 31.4, 43.9, 45.6, 60.5, 68.7, 112.3, 114.1, 118.5, 128.2, 132.7, 142.6, 143.6, 167.6, 171.8; HRMS (ESI) calcd for  $\text{C}_{18}\text{H}_{20}\text{N}_3\text{O}_3^+$   $[\text{M} + \text{H}]^+$  326.1499, found 326.1491.

**(E)-Ethyl 2-(7-Oxo-3-(4-(trifluoromethyl)phenyl)tetrahydropyrazolo[1,2-a]pyrazol-1(5H)-ylidene)propanoate (3ja)**

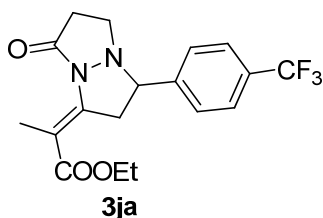

98% yield; pale-yellow solid. IR (film)  $\nu_{\max}$  2931, 1730, 1650, 1621, 1541, 1419, 1326, 1280, 1249, 1164, 1126, 1068, 1019, 979, 844, 767, 738, 669, 605  $\text{cm}^{-1}$ ;  $^1\text{H}$  NMR (400 MHz,  $\text{CDCl}_3$ )  $\delta$  1.26 (t,  $J = 7.1$  Hz, 3H), 2.08 (app. d, 3H), 2.72–2.89 (m, 2H), 2.96–3.06 (m, 2H), 3.57–3.65 (m, 1H), 3.75–3.85 (m, 2H), 4.16 (q,  $J = 7.1$  Hz, 2H), 7.51 (d,  $J = 8.1$  Hz, 2H), 7.63 (d,  $J = 8.1$  Hz, 2H);  $^{13}\text{C}$  NMR (100 MHz,  $\text{CDCl}_3$ )  $\delta$  14.3, 17.0, 31.4, 43.9, 45.4, 60.5, 68.8, 114.0, 116.7, 116.9, 117.9, 125.3, 125.8, 127.9, 130.5, 130.8, 142.12, 142.14, 142.9, 167.6, 172.0; HRMS (ESI) calcd for  $\text{C}_{18}\text{H}_{20}\text{F}_3\text{N}_2\text{O}_3^+$   $[\text{M} + \text{H}]^+$  369.1421, found 369.1430.

**(E)-Ethyl 2-(3-(3-Nitrophenyl)-7-oxotetrahydropyrazolo[1,2-a]pyrazol-1(5H)-ylidene)propanoate (3ka)**

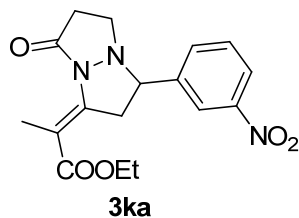

97% yield; pale-yellow solid. IR (film)  $\nu_{\max}$  2980, 2930, 2849, 1730, 1649, 1605, 1531, 1445, 1349, 1531, 1445, 1349, 1280, 1156, 1098, 1059, 1025, 811, 767, 736, 690, 669  $\text{cm}^{-1}$ ;  $^1\text{H}$  NMR (400 MHz,  $\text{CDCl}_3$ )  $\delta$  1.26 (t,  $J = 7.1$  Hz, 3H), 2.07 (t,  $J = 1.7$  Hz, 3H), 2.74–2.91 (m, 2H), 2.96–3.06 (m, 2H), 3.60–3.67 (m, 1H), 3.78–3.91 (m, 2H), 4.16 (q,  $J = 7.1$  Hz, 2H), 7.56 (t,  $J = 7.9$  Hz, 1H), 7.73 (d,  $J = 7.7$  Hz, 1H), 8.18 (ddd,  $J = 8.2, 2.2, 1.0$  Hz, 1H), 8.28 (t,  $J = 1.9$  Hz, 1H);  $^{13}\text{C}$  NMR (100 MHz,  $\text{CDCl}_3$ )  $\delta$  14.3, 17.00, 17.01, 31.4, 44.0, 45.6, 60.5, 68.3, 114.1, 122.6, 123.4, 129.9, 133.6, 140.5, 142.6, 148.6, 167.6, 171.8; HRMS (ESI) calcd for  $\text{C}_{17}\text{H}_{20}\text{N}_3\text{O}_5^+$  [ $\text{M} + \text{H}$ ] $^+$  346.1397, found 346.1384.

**(E)-Ethyl 2-(3-(2-Nitrophenyl)-7-oxotetrahydropyrazolo[1,2-a]pyrazol-1(5H)-ylidene)propanoate (3la)**

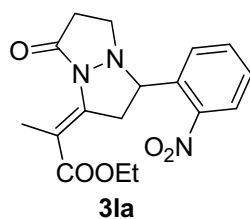

94% yield; pale-yellow solid. IR (film)  $\nu_{\max}$  2981, 2930, 1714, 1650, 1605, 1577, 1530, 1446, 1349, 1284, 1099, 1060, 1026, 981, 854, 789, 767, 738, 703, 669  $\text{cm}^{-1}$ ;  $^1\text{H}$  NMR (400 MHz,  $\text{CDCl}_3$ )  $\delta$  1.26 (t,  $J = 7.1$  Hz, 3H), 2.07 (t,  $J = 1.7$  Hz, 3H), 2.71–3.04 (m, 4H), 3.59–3.66 (m, 1H), 4.00 (ddd,  $J = 18.4, 7.8, 1.6$  Hz, 1H), 4.16 (q,  $J = 7.1$  Hz, 6H), 4.33 (dd,  $J = 9.8, 7.9$  Hz, 3H), 7.45–7.49 (m, 1H), 7.64–7.68 (m, 1H), 7.94–7.98 (m, 2H);  $^{13}\text{C}$  NMR (100 MHz,  $\text{CDCl}_3$ )  $\delta$  14.3, 17.0, 31.4, 43.5, 45.8, 60.5, 63.8, 114.0, 124.7, 128.8, 133.87, 133.9, 142.8, 149.5, 167.6, 172.0; HRMS (ESI) calcd for  $\text{C}_{17}\text{H}_{20}\text{N}_3\text{O}_5^+$  [ $\text{M} + \text{H}$ ] $^+$  346.1397, found 346.1408.



**(E)-Ethyl 2-(7-oxo-3-(*o*-tolyl)tetrahydropyrazolo[1,2-*a*]pyrazol-1(5H)-ylidene)propanoate (3ma)**

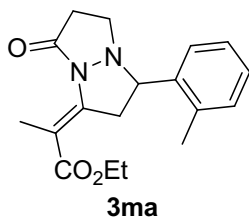

70% yield; white solid. IR (film)  $\nu_{\max}$  2980, 2929, 2851, 1708, 1648, 1491, 1460, 1444, 1365, 1302, 1279, 1249, 1200, 1174, 1157, 1112, 1095, 1057, 1112, 1095, 1057, 1026, 798, 761, 726;  $^1\text{H}$  NMR (300 MHz,  $\text{CDCl}_3$ )  $\delta$  7.59 – 7.52 (m, 1H), 7.25 – 7.14 (m, 3H), 4.17 (q,  $J = 7.1$  Hz, 2H), 3.99 (dd,  $J = 10.4, 7.5$  Hz, 1H), 3.81 (ddd,  $J = 18.3, 7.5, 1.6$  Hz, 1H), 3.66 (ddd,  $J = 11.7, 9.6, 8.2$  Hz, 1H), 3.02 (ddd,  $J = 11.7, 8.9, 6.7$  Hz, 1H), 2.94 – 2.77 (m, 3H), 2.33 (s, 3H), 2.09 (t,  $J = 1.8$  Hz, 3H), 1.26 (dd,  $J = 9.2, 5.0$  Hz, 3H);  $^{13}\text{C}$  NMR (75 MHz,  $\text{CDCl}_3$ )  $\delta$  172.0, 167.7, 143.5, 136.1, 135.9, 130.6, 127.6, 126.6, 126.1, 113.7, 65.7, 60.4, 45.6, 42.3, 31.6, 19.3, 17.0, 14.3; HRMS (ESI) calcd for  $\text{C}_{18}\text{H}_{23}\text{N}_2\text{O}_3^+$   $[\text{M} + \text{H}]^+$  315.1703, found 315.1695.

**(E)-Ethyl 2-(3-([1,1'-biphenyl]-2-yl)-7-oxotetrahydropyrazolo[1,2-*a*]pyrazol-1(5H)-ylidene)propanoate (3na)**

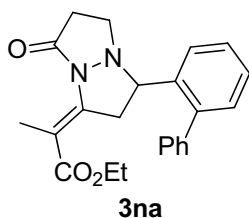

50% yield; white solid. IR (film)  $\nu_{\max}$  3059, 3025, 2978, 2929, 2854, 1728, 1651, 1479, 1441, 1420, 1366, 1281, 1242, 1195, 1175, 1155, 1095, 1053, 1026, 862, 800, 759, 738, 705;  $^1\text{H}$  NMR (300 MHz,  $\text{CDCl}_3$ )  $\delta$  7.72 (dd,  $J = 7.8, 1.3$  Hz, 1H), 7.54 – 7.27 (m, 5H), 7.28 – 7.14 (m, 3H), 4.16 (q,  $J = 7.1$  Hz, 2H), 3.79 (dd,  $J = 10.5, 7.5$  Hz, 1H), 3.65 – 3.40 (m, 2H), 3.03 (ddd,  $J = 18.3, 10.5, 2.1$  Hz, 1H), 2.85 (ddd,  $J = 12.0, 9.8, 5.5$  Hz, 1H), 2.68 – 2.41 (m, 2H), 2.03 (t,  $J = 1.8$  Hz, 3H), 1.27 (t,  $J = 6.3$  Hz, 3H);  $^{13}\text{C}$  NMR (75 MHz,  $\text{CDCl}_3$ )  $\delta$  172.42, 167.69, 143.86, 142.86, 140.53, 135.35, 129.81, 128.95, 128.40, 128.11, 127.49, 127.07, 113.62, 65.05, 60.33, 44.91, 44.08, 31.21, 16.92, 14.29; HRMS (ESI) calcd for  $\text{C}_{23}\text{H}_{25}\text{N}_2\text{O}_3^+$   $[\text{M} + \text{H}]^+$  377.1860, found 377.1855.

**(E)-Ethyl 2-(3-(naphthalen-1-yl)-7-oxotetrahydropyrazolo[1,2-a]pyrazol-1(5H)-ylidene)propanoate (3oa)**

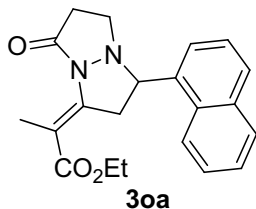

57% yield; white solid. IR (film)  $\nu_{\max}$  3052, 2980, 2930, 1709, 1650, 1597, 1512, 1444, 1421, 1388, 1281, 1201, 1172, 1100, 1060, 1022, 978, 863, 803, 781, 737;  $^1\text{H}$  NMR (300 MHz,  $\text{CDCl}_3$ )  $\delta$  8.07 – 7.98 (m, 1H), 7.92 – 7.72 (m, 3H), 7.52 (tdd,  $J = 14.1, 9.6, 4.8$  Hz, 3H), 4.51 (dd,  $J = 10.3, 7.9$  Hz, 1H), 4.14 (q,  $J = 7.1$  Hz, 2H), 4.09 – 3.97 (m, 1H), 3.72 (m,  $J = 11.7, 9.7, 8.2$  Hz, 1H), 3.15 – 2.98 (m, 2H), 2.96 – 2.72 (m, 2H), 2.13 (t,  $J = 1.8$  Hz, 3H), 1.24 (m,  $J = 9.9, 4.3$  Hz, 3H);  $^{13}\text{C}$  NMR (75 MHz,  $\text{CDCl}_3$ )  $\delta$  172.00, 167.64, 143.41, 133.83, 133.72, 131.25, 128.98, 128.39, 126.37, 125.80, 125.62, 123.86, 122.82, 113.86, 60.33, 45.83, 43.00, 31.61, 17.02, 14.23; HRMS (ESI) calcd for  $\text{C}_{21}\text{H}_{23}\text{N}_2\text{O}_3^+$   $[\text{M} + \text{H}]^+$  351.1703, found 351.1697.

**(E)-Ethyl 2-(3-(Naphthalen-2-yl)-7-oxotetrahydropyrazolo[1,2-a]pyrazol-1(5H)-ylidene)propanoate (3pa)**

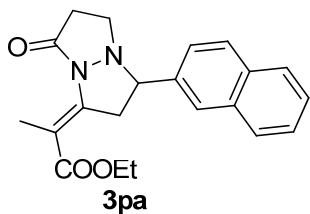

96% yield; pale-yellow solid. IR (film)  $\nu_{\max}$  3055, 2980, 2930, 2849, 1726, 1649, 1605, 1508, 1445, 1280, 1198, 1174, 1097, 1058, 1020, 860, 822, 736, 702, 479  $\text{cm}^{-1}$ ;  $^1\text{H}$  NMR (400 MHz,  $\text{CDCl}_3$ )  $\delta$  1.27 (t,  $J = 7.1$  Hz, 3H), 2.12 (app. t, 3H), 2.72–2.93 (m, 2H), 3.07–3.19 (m, 2H), 3.56–3.64 (m, 1H), 3.82 (ddd,  $J = 18.3, 7.5, 1.4$  Hz, 1H), 3.92 (dd,  $J = 10.0, 7.7$  Hz, 1H), 4.18 (q,  $J = 7.1$  Hz, 2H), 7.48–7.53 (m, 3H), 7.83–7.88 (m, 4H);  $^{13}\text{C}$  NMR (100 MHz,  $\text{CDCl}_3$ )  $\delta$  14.3, 17.1, 31.5, 43.8, 45.2, 60.4, 69.6, 113.8, 125.0, 126.3, 126.5, 127.0, 127.80, 127.83, 128.8, 133.3, 133.4, 135.2, 143.5, 167.8, 172.2; HRMS (ESI) calcd for  $\text{C}_{21}\text{H}_{23}\text{N}_2\text{O}_3^+$   $[\text{M} + \text{H}]^+$  351.1703, found 351.1713.

**(E)-Ethyl 2-(7-Oxo-3-(pyridin-4-yl)tetrahydropyrazolo[1,2-a]pyrazol-1(5H)-ylidene)propanoate (3qa)**

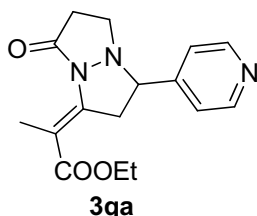

86% yield; pale-yellow solid. IR (film)  $\nu_{\max}$  2980, 2931, 1730, 1650, 1601, 1560, 1445, 1415, 1281, 1101, 1051, 1025, 992, 828, 767, 734, 670, 578  $\text{cm}^{-1}$ ;  $^1\text{H}$  NMR (400 MHz,  $\text{CDCl}_3$ )  $\delta$  1.26 (t,  $J = 7.1$  Hz, 3H), 2.07 (app. d, 3H), 2.73–3.05 (m, 4H), 3.61–3.68 (m, 1H), 3.73–3.82 (m, 2H), 4.16 (q,  $J = 7.1$  Hz, 2H), 7.31 (d,  $J = 4.0$  Hz, 2H), 8.61 (s, 2H);  $^{13}\text{C}$  NMR (100 MHz,  $\text{CDCl}_3$ )  $\delta$  14.3, 17.0, 31.4, 43.5, 45.7, 60.5, 68.0, 114.1, 129.1, 142.6, 147.2, 150.4, 167.6, 171.8; HRMS (ESI) calcd for  $\text{C}_{16}\text{H}_{20}\text{N}_3\text{O}_3^+$   $[\text{M} + \text{H}]^+$  302.1499, found 302.1497.

**(E)-Ethyl 2-(3-(Furan-2-yl)-7-oxotetrahydropyrazolo[1,2-a]pyrazol-1(5H)-ylidene)propanoate (3ra)**

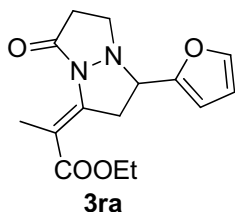

99% yield; pale-yellow solid. IR (film)  $\nu_{\max}$  2976, 2928, 2867, 1714, 1628, 1601, 1520, 1464, 1394, 1350, 1285, 1232, 1151, 1038, 996, 949, 857, 738, 697, 650  $\text{cm}^{-1}$ ;  $^1\text{H}$  NMR (400 MHz,  $\text{CDCl}_3$ )  $\delta$  1.29 (t,  $J = 7.1$  Hz, 3H), 2.06 (s, 3H), 2.70 (s, br, 2H), 3.47 (app. d, br, 4H), 3.95 (s, br, 1H), 4.19 (q,  $J = 7.1$  Hz, 2H), 6.31 (s, 1H), 6.36 (dd,  $J = 3.2, 1.9$  Hz, 1H), 7.42 (d,  $J = 1.2$  Hz, 1H);  $^{13}\text{C}$  NMR (100 MHz,  $\text{CDCl}_3$ )  $\delta$  14.2, 17.0, 31.2, 39.2, 45.0, 60.4, 60.9, 77.2, 109.0, 110.6, 114.1, 143.1, 150.6, 167.7, 172.4; HRMS (ESI) calcd for  $\text{C}_{15}\text{H}_{19}\text{N}_2\text{O}_4^+$   $[\text{M} + \text{H}]^+$  291.1339, found 291.1334.

**(E)-Ethyl 2-(3-Cyclohexyl-7-oxotetrahydropyrazolo[1,2-a]pyrazol-1(5H)-ylidene)propanoate (3sa)**

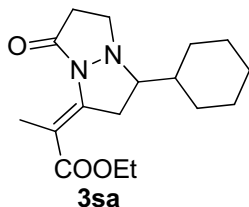

55% yield; white solid. IR (film)  $\nu_{\max}$  3055, 2925, 2852, 1715, 1634, 1601, 1541, 1521, 1507, 1448, 1338, 1278, 1112, 801, 767, 736, 702, 669  $\text{cm}^{-1}$ ;  $^1\text{H}$  NMR (400 MHz,  $\text{CDCl}_3$ )  $\delta$  0.97–1.30 (m, 8H), 1.44–1.52 (m, 1H), 1.63–1.78 (m, 5H), 1.99 (t,  $J = 1.7$  Hz, 3H), 2.56 (td,  $J = 9.0, 6.2$  Hz, 1H), 2.73 (ddd,  $J = 16.7, 9.2, 5.1$  Hz, 1H), 2.85–2.94 (m, 2H), 3.03 (dd,  $J = 19.8, 9.4$  Hz, 1H), 3.42 (ddd,  $J = 18.5, 8.5, 1.7$  Hz, 1H), 3.68–3.74 (m, 1H), 4.14–4.21 (m, 2H);  $^{13}\text{C}$  NMR (100 MHz,  $\text{CDCl}_3$ )  $\delta$  14.2, 16.9, 25.8, 26.1, 26.3, 28.1, 30.3, 33.4, 37.7, 40.6, 50.1, 60.2, 70.7, 111.9, 142.5, 168.0, 168.2; HRMS (ESI) calcd for  $\text{C}_{17}\text{H}_{27}\text{N}_2\text{O}_3^+$   $[\text{M} + \text{H}]^+$  307.2016, found 307.2010.

**(E)-Ethyl 2-(3-Butyl-7-oxotetrahydropyrazolo[1,2-a]pyrazol-1(5H)-ylidene)propanoate (3ta)**

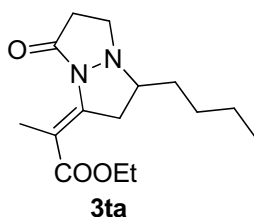

41% yield; white solid. IR (film)  $\nu_{\max}$  2930, 1716, 1647, 1557, 1541, 1522, 1508, 1457, 1339, 1279, 1121  $\text{cm}^{-1}$ ;  $^1\text{H}$  NMR (400 MHz,  $\text{CDCl}_3$ )  $\delta$  0.92 (t,  $J = 6.7$  Hz, 3 H), 1.26–1.46 (m, 9H), 2.02 (d,  $J = 1.9$  Hz, 3H), 2.63–2.86 (m, 4H), 3.06–3.15 (m, 1H), 3.47–3.58 (m, 1H), 3.65–3.74 (m, 1H), 4.19 (q,  $J = 7.1$  Hz, 2H);  $^{13}\text{C}$  NMR (100 MHz,  $\text{CDCl}_3$ )  $\delta$  13.9, 14.3, 16.9, 22.8, 28.1, 32.0, 32.4, 40.5, 47.0, 60.3, 65.8, 112.9, 143.4, 168.0, 170.2; HRMS (ESI) calcd for  $\text{C}_{15}\text{H}_{25}\text{N}_2\text{O}_3^+$   $[\text{M} + \text{H}]^+$  281.1860, found 281.1865.

**(E)-Ethyl 2-(3-Isopropyl-7-oxotetrahydropyrazolo[1,2-a]pyrazol-1(5H)-ylidene)propanoate (3ua)**

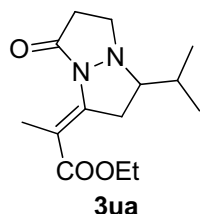

48% yield; yellow solid. IR (film)  $\nu_{\max}$  2961, 1710, 1636, 1557, 1541, 1522, 1508, 1457, 1388, 1349, 1280, 1198, 1125, 767  $\text{cm}^{-1}$ ;  $^1\text{H}$  NMR (300 MHz,  $\text{CDCl}_3$ )  $\delta$  0.96 (dd,  $J = 11.9, 6.8$  Hz, 6H), 1.30 (t,  $J = 7.1$  Hz, 3 H), 1.77–1.88 (m, 1H), 2.00 (d,  $J = 1.9$  Hz, 3H), 2.55–2.63 (m, 1H), 2.72–3.09 (m, 4H), 3.34–3.45 (m, 1H), 3.67–3.76 (m, 1H), 4.14–4.24 (m, 2H);  $^{13}\text{C}$  NMR (75 MHz,  $\text{CDCl}_3$ )  $\delta$  14.3, 17.0, 17.2, 19.7, 29.9, 33.3, 36.8, 49.5, 60.2, 71.2, 112.2, 142.7, 168.0, 168.5; HRMS (ESI) calcd for  $\text{C}_{14}\text{H}_{23}\text{N}_2\text{O}_3^+$   $[\text{M} + \text{H}]^+$  267.1703, found 267.1706.

**Diethyl 8-Methyl-5-(4-nitrophenyl)-1-oxo-2,3,5,6-tetrahydro-1H-pyrazolo[1,2-a]pyridazine-6,7-dicarboxylate (4)**

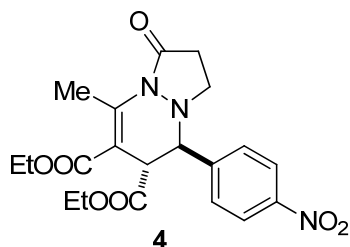

Pale-yellow solid. IR (film)  $\nu_{\max}$  2918, 1710, 1647, 1607, 1558, 1523, 1457, 1348, 1211, 1176, 1127, 1092, 1025, 896, 668  $\text{cm}^{-1}$ ;  $^1\text{H}$  NMR (400 MHz,  $\text{CDCl}_3$ )  $\delta$  0.99 (t,  $J = 7.1$  Hz, 3H), 1.22 (t,  $J = 7.1$  Hz, 3H), 2.50–2.75 (m, 3H), 2.86 (d,  $J = 1.7$  Hz, 3H), 3.09 (ddd,  $J = 9.5, 8.3, 4.0$  Hz, 1H), 3.77–3.80 (m, 1H), 3.90–4.02 (m, 3H), 4.11–4.19 (m, 2H), 7.50 (d,  $J = 8.7$  Hz, 2H), 8.26 (d,  $J = 8.7$  Hz, 2H);  $^{13}\text{C}$  NMR (100 MHz,  $\text{CDCl}_3$ )  $\delta$  14.0, 14.1, 16.0, 31.8, 48.4, 51.3, 60.6, 61.1, 68.3, 106.8, 124.2, 129.4, 144.0, 145.4, 148.3, 166.3, 169.2, 171.1; HRMS (ESI) calcd for  $\text{C}_{20}\text{H}_{24}\text{N}_3\text{O}_7^+$   $[\text{M} + \text{H}]^+$  418.1609, found 418.1592.

***trans*-Diethyl 5-(4-Nitrophenyl)-1-oxo-1,2,3,5,6,9-hexahydropyrazolo[1,2-*a*][1,2]diazepine-6,7-dicarboxylate (*trans*-5)**

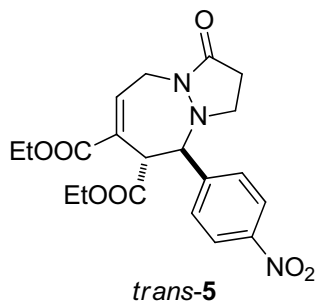

Pale-yellow solid. IR (film)  $\nu_{\max}$  2917, 1714, 1653, 1606, 1521, 1457, 1347, 1231, 1107, 1034, 856, 777, 748, 708, 669  $\text{cm}^{-1}$ ;  $^1\text{H}$  NMR (400 MHz,  $\text{CDCl}_3$ )  $\delta$  1.11 (t,  $J = 7.1$  Hz, 3H), 1.26 (t,  $J = 7.1$  Hz, 3H), 2.23 (dd,  $J = 16.2, 7.1$  Hz, 1H), 2.94 (dd,  $J = 11.9, 8.0$  Hz, 1H), 3.11–3.18 (m, 1H), 3.55 (td,  $J = 12.7, 7.3$  Hz, 1H), 3.95–4.07 (m, 4H), 4.09–4.16 (m, 1H), 4.26 (dq,  $J = 10.8, 7.1$  Hz, 1H), 4.78 (dd,  $J = 19.6, 2.0$  Hz, 1H), 5.32 (s, 1H), 7.13 (dd,  $J = 4.2, 2.3$  Hz, 1H), 7.65 (d,  $J = 8.8$  Hz, 2H), 8.17 (d,  $J = 8.6$  Hz, 2H);  $^{13}\text{C}$  NMR (125 MHz,  $\text{CDCl}_3$ )  $\delta$  13.9, 14.3, 29.2, 46.8, 47.6, 51.3, 61.3, 62.2, 69.8, 123.6, 125.8, 128.3, 138.9, 147.2, 147.6, 165.5, 170.5, 174.5; HRMS (ESI) calcd for  $\text{C}_{20}\text{H}_{24}\text{N}_3\text{O}_7^+$   $[\text{M} + \text{H}]^+$  418.1609, found 418.1593.

***cis*-Diethyl 5-(4-Nitrophenyl)-1-oxo-1,2,3,5,6,9-hexahydropyrazolo[1,2-*a*][1,2]diazepine-6,7-dicarboxylate (*cis*-5)**

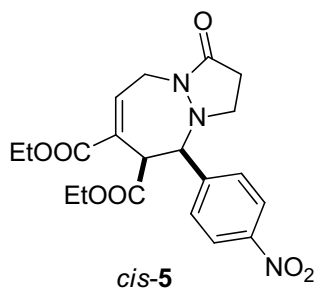

Pale-yellow solid. IR (film)  $\nu_{\max}$  2980, 2919, 2850, 1710, 1655, 1605, 1522, 1457, 1347, 1231, 1034, 854, 649  $\text{cm}^{-1}$ ;  $^1\text{H}$  NMR (400 MHz,  $\text{CDCl}_3$ )  $\delta$  1.09 (dt,  $J = 12.2, 7.1$  Hz, 6H), 2.26 (ddd,  $J = 16.2, 8.1, 2.0$  Hz, 1H), 2.73–2.82 (m, 1H), 2.97 (t,  $J = 9.2$  Hz, 1H), 3.47 (td,  $J = 11.6, 8.4$  Hz, 1H), 3.95–4.07 (m, 4H), 4.33–4.43 (m, 3H), 4.81 (dd,  $J = 17.6, 3.9$  Hz, 1H), 7.20 (t,  $J = 4.9$  Hz, 1H), 7.68 (d,  $J = 8.7$  Hz, 2H), 8.17 (d,  $J = 8.7$  Hz, 2H);  $^{13}\text{C}$  NMR (75 MHz,  $\text{CDCl}_3$ )  $\delta$  14.0, 14.4, 29.3, 47.0, 47.8, 51.4, 61.4, 62.3, 70.0, 123.7, 126.0, 128.4, 139.0, 147.3, 147.8, 165.6, 170.6, 174.6; HRMS (ESI) calcd for  $\text{C}_{20}\text{H}_{24}\text{N}_3\text{O}_7^+$   $[\text{M} + \text{H}]^+$  418.1609, found 418.1610.

**Ethyl 5-(4-Nitrophenyl)-1-oxo-2,3,5,6-tetrahydro-1H-pyrazolo[1,2-a]pyridazine-6-carboxylate (6)**

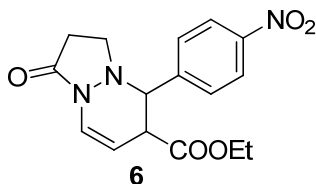

Pale-yellow solid. IR (film)  $\nu_{\max}$  2985, 2950, 2905, 1701, 1647, 1601, 1567, 1541, 1523, 1473, 1457, 1410, 1348, 1280, 1178, 1119, 852  $\text{cm}^{-1}$ ;  $^1\text{H}$  NMR (400 MHz,  $\text{CDCl}_3$ )  $\delta$  1.13 (t,  $J = 7.1$  Hz, 3H), 2.52–2.65 (m, 3H), 3.10 (dd,  $J = 8.1, 4.6$  Hz, 1H), 3.59 (dt,  $J = 8.8, 2.4$  Hz, 1H), 3.98–4.09 (m, 3H), 5.24 (dd,  $J = 8.1, 2.3$  Hz, 1H), 7.09 (dd,  $J = 8.1, 2.2$  Hz, 1H), 7.58 (d,  $J = 8.6$  Hz, 2H), 8.25 (d,  $J = 8.8$  Hz, 2H);  $^{13}\text{C}$  NMR (125 MHz,  $\text{CDCl}_3$ )  $\delta$  14.0, 30.8, 49.2, 50.2, 61.4, 67.6, 104.3, 120.7, 124.0, 144.7, 147.8, 148.2, 165.1, 170.0; HRMS (ESI) calcd for  $\text{C}_{16}\text{H}_{18}\text{N}_3\text{O}_5^+$  [ $\text{M} + \text{H}$ ] $^+$  332.1241, found 332.1229.

**Ethyl 8-Ethyl-5-(4-nitrophenyl)-1-oxo-2,3,5,8-tetrahydro-1H-pyrazolo[1,2-a]pyridazine-6-carboxylate (6'ap)**

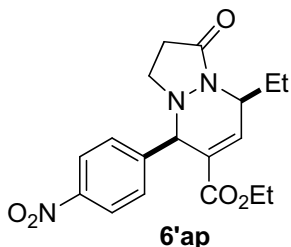

Yellow semi-solid. IR (neat)  $\nu_{\max}$  2973, 1712, 1685, 1650, 1605, 1521, 1490, 1460 1411, 1373, 1347, 1263, 1249, 1204, 1180, 1099, 1033, 917, 857, 839, 812, 749, 732, 711, 697, 694, 683, 676  $\text{cm}^{-1}$ ;  $^1\text{H}$  NMR (300 MHz,  $\text{CDCl}_3$ )  $\delta$  8.21 (dd,  $J = 7.6, 1.3$  Hz, 2H), 7.41 (d,  $J = 8.2$  Hz, 2H), 7.30 (s, 1H), 4.87 (s, 1H), 4.78 (tt,  $J = 10.7, 5.3$  Hz, 1H), 4.25–3.93 (m, 2H), 3.57 (td,  $J = 12.2, 9.5$  Hz, 1H), 3.34–3.14 (m, 1H), 2.09–1.73 (m, 3H), 1.19 (t,  $J = 7.1$  Hz, 4H), 1.08 (t,  $J = 7.5$  Hz, 3H);  $^{13}\text{C}$  NMR (75 MHz,  $\text{CD}_2\text{Cl}_2$ )  $\delta$  170.0, 163.7, 148.0, 143.3, 137.6, 130.2, 130.0, 123.7, 63.1, 61.1, 52.1, 45.6, 30.0, 26.7, 13.9, 10.5; HRMS (EI) calcd for  $\text{C}_{18}\text{H}_{21}\text{N}_3\text{O}_5^+$  [ $\text{M}^+$ ] 359.1481, found 359.1473.

**Ethyl 8-Isopropyl-5-(4-nitrophenyl)-1-oxo-2,3,5,8-tetrahydro-1H-pyrazolo[1,2-a]pyridazine-6-carboxylate (6'aq)**

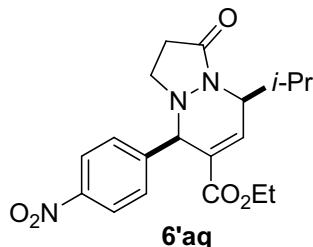

Yellow semi-solid. IR (neat)  $\nu_{\max}$  2959, 2925, 1713, 1689, 1521, 1462, 1408, 1374, 1348, 1283, 1263, 1249, 1100, 1076, 837, 749  $\text{cm}^{-1}$ ;  $^1\text{H}$  NMR (300 MHz,  $\text{CDCl}_3$ )  $\delta$  8.21 (d,  $J = 8.9$  Hz, 2H), 7.38 (d,  $J = 7.9$  Hz, 2H), 7.28 (dd,  $J = 2.8, 2.1$  Hz, 1H), 4.87 (s, 1H), 4.65 (dd,  $J = 6.1, 3.6$  Hz, 1H), 4.10 (q,  $J = 7.1$  Hz, 2H), 3.59 (td,  $J = 12.3, 9.4$  Hz, 1H), 3.26 (t,  $J = 10.6$  Hz, 1H), 2.19 (dq,  $J = 13.3, 6.7$  Hz, 1H), 1.96 (ddd,  $J = 16.9, 9.3, 1.6$  Hz, 1H), 1.19 (t,  $J = 7.1$  Hz, 3H), 1.12–1.03 (m, 7H);  $^{13}\text{C}$  NMR (75 MHz,  $\text{CDCl}_3$ )  $\delta$  170.7, 163.8, 148.1, 143.4, 136.7, 130.8, 130.0, 123.8, 63.1, 61.2, 56.2, 45.5, 33.3, 30.0, 19.3, 14.0; HRMS (ESI) calcd for  $\text{C}_{19}\text{H}_{24}\text{N}_3\text{O}_5^+$   $[\text{M} + \text{H}]^+$  374.1710, found 374.1694.

**Ethyl 8-(tert-Butyl)-5-(4-nitrophenyl)-1-oxo-2,3,5,8-tetrahydro-1H-pyrazolo[1,2-a]pyridazine-6-carboxylate (6'ar)**

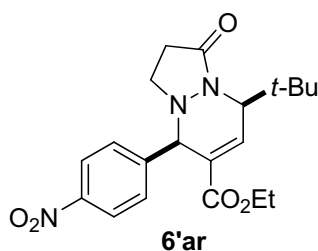

Yellow semi-solid. IR (neat)  $\nu_{\max}$  2959, 2924, 1691, 1522, 1401, 1393, 1374, 1347, 1283, 1262, 1230, 1097, 1077, 1057, 858, 840, 812, 750, 738, 676  $\text{cm}^{-1}$ ;  $^1\text{H}$  NMR (300 MHz,  $\text{CDCl}_3$ )  $\delta$  8.20 (d,  $J = 8.2$  Hz, 2H), 7.65–7.27 (m, 3H), 4.87 (s, 1H), 4.59 (d,  $J = 3.5$  Hz, 1H), 4.10 (q,  $J = 7.1$  Hz, 2H), 3.60 (td,  $J = 12.5, 9.3$  Hz, 1H), 3.35–3.21 (m, 1H), 1.98–1.85 (m, 1H), 1.19 (t,  $J = 7.1$  Hz, 3H), 1.11 (s, 9H), 1.05–0.98 (m, 1H);  $^{13}\text{C}$  NMR (75 MHz,  $\text{CDCl}_3$ )  $\delta$  171.5, 163.8, 148.2, 143.5, 136.0, 131.3, 123.8, 63.0, 61.2, 59.3, 45.5, 37.9, 29.9, 27.4, 14.0; HRMS (ESI) calcd for  $\text{C}_{20}\text{H}_{25}\text{N}_3\text{NaO}_5$   $[\text{M} + \text{Na}]$  410.1686, found 410.1681.



### General Procedure for the [3 + 2 + 3] Cycloadditions of Azomethine Imines and Allenates

Tricyclohexylphosphine (7.01 mg, 0.025 mmol) was added to a solution of the azomethine imine **1** (0.125 mmol) and ethyl 2,3-butadienoate (**2o**, 28 mg, 0.25 mmol) in DCM (4 mL) and benzene (1 mL) in an oven-dried 15 mL Schlenk tube at 0 °C. The mixture was stirred at 0 °C for 120 h and then concentrated. The residue was purified through flash column chromatography (EtOAc/hexane) to afford the corresponding cycloaddition products **7/8**.

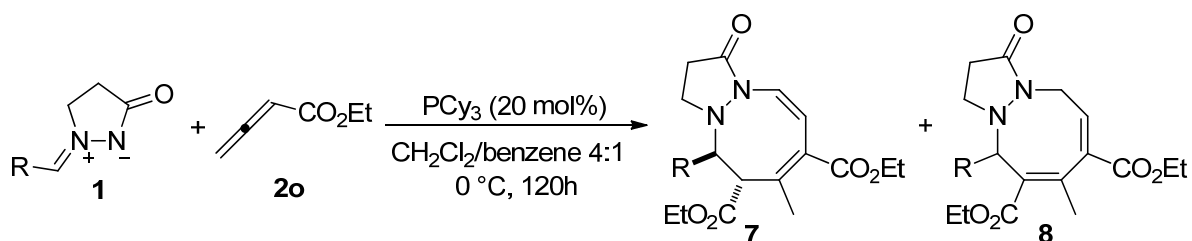

Notes:

1. The NMR spectroscopic data were read using the following principles: (a) If the peaks of two isomers did not overlap, the peaks of each isomer were read and are reported separately. (b) If the peaks of the two isomers overlap, the peaks of each isomer were not read and are not described.
2. The IR data were recorded using the thin film method. The samples were dissolved in DCM; the solution was placed on the salt plate; DCM was evaporated; the data were collected. In principle, the data collected were those of the mixture.
3. HRMS data were recorded from a solution of the mixture of the two isomers in CHCl<sub>3</sub>.

**(7E,9Z)**-Diethyl 7-Methyl-5-(4-nitrophenyl)-1-oxo-2,3,5,6-tetrahydro-1H-pyrazolo[1,2-a][1,2]diazocine-6,8-dicarboxylate (**7a**); **(6E,8E)**-Diethyl 7-Methyl-5-(4-nitrophenyl)-1-oxo-2,3,5,10-tetrahydro-1H-pyrazolo[1,2-a][1,2]diazocine-6,8-dicarboxylate (**8a**)

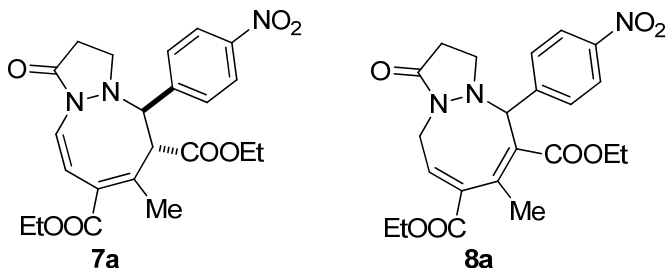

**7a + 8a**: 65% yield; yellow solid. IR (film)  $\nu_{\max}$  2918, 1715, 1698, 1652, 1541, 1521, 1473, 1456, 1418, 1396, 1347, 1243  $\text{cm}^{-1}$ ; HRMS (ESI) calcd for  $\text{C}_{22}\text{H}_{26}\text{N}_3\text{O}_7^+$   $[\text{M} + \text{H}]^+$  444.1765, found 444.1744.

**8a** (major isomer):  $^1\text{H}$  NMR (300 MHz,  $\text{CDCl}_3$ )  $\delta$  8.10–7.98 (m, 2H), 7.62 (dd,  $J = 9.0, 1.1$  Hz, 2H), 6.05 (dd,  $J = 4.7, 2.8$  Hz, 1H), 5.64 (s, 1H), 4.87 (dd,  $J = 19.2, 2.8$  Hz, 1H), 4.37 (q,  $J = 7.1$  Hz, 2H), 4.05–3.87 (m, 3H), 3.66 (dd,  $J = 19.2, 4.7$  Hz, 1H), 3.57–3.45 (m, 1H), 2.71 (ddd,  $J = 16.7, 12.7, 9.0$  Hz, 1H), 2.30 (dd,  $J = 15.1, 7.5$  Hz, 1H), 2.22 (s, 3H), 1.40 (t,  $J = 7.1$  Hz, 3H), 1.14 (dd,  $J = 10.0, 4.3$  Hz, 3H).

**7a** (minor isomer):  $^1\text{H}$  NMR (300 MHz,  $\text{CDCl}_3$ )  $\delta$  8.20 (d,  $J = 8.9$  Hz, 2H), 7.52–7.19 (m, 2H), 6.78 (t,  $J = 3.5$  Hz, 1H), 5.43 (s, 1H), 4.30–4.20 (m, 2H), 4.12 (m, 3H), 2.61–2.38 (m, 1H), 2.18 (s, 3H), 1.32 (t,  $J = 7.1$  Hz, 3H), 1.18 (t,  $J = 7.1$  Hz, 3H).

**(7E,9Z)-Diethyl 7-Methyl-1-oxo-5-phenyl-2,3,5,6-tetrahydro-1H-pyrazolo[1,2-a][1,2]diazocine-6,8-dicarboxylate (7b)**; **(6E,8E)-Diethyl 7-Methyl-1-oxo-5-phenyl-2,3,5,10-tetrahydro-1H-pyrazolo[1,2-a][1,2]diazocine-6,8-dicarboxylate (8b)**

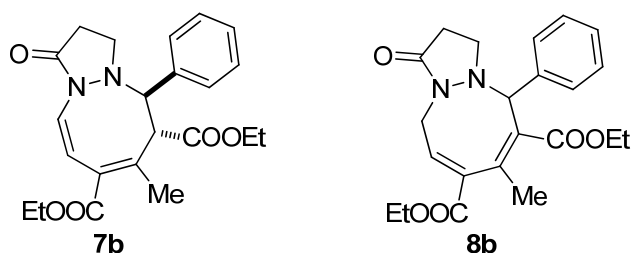

**7b + 8b**: 81% yield; yellow solid. IR (film)  $\nu_{\max}$  2980, 1716, 1699, 1662, 1567, 1541, 1491, 1417, 1396, 1366, 1241, 1201, 1098, 1039, 760, 736, 705, 668  $\text{cm}^{-1}$ ; HRMS (ESI) calcd for  $\text{C}_{22}\text{H}_{27}\text{N}_2\text{O}_5^+$   $[\text{M} + \text{H}]^+$  399.1914, found 399.1918.

**8b** (major isomer):  $^1\text{H}$  NMR (300 MHz,  $\text{CDCl}_3$ )  $\delta$  7.43–7.07 (m, 4H), 6.13 (dd,  $J = 5.0, 3.6$  Hz, 1H), 5.48 (s, 1H), 4.68 (dd,  $J = 18.3, 3.6$  Hz, 1H), 4.34–4.26 (m, 2H), 4.10–3.95 (m, 2H), 3.85–3.71 (m, 1H), 3.39 (ddd,  $J = 37.9, 20.0, 15.5$  Hz, 1H), 2.74 (ddd,  $J = 16.8, 12.2, 9.0$  Hz, 1H), 2.35–2.17 (m, 1H), 2.15 (s, 3H), 1.35 (t,  $J = 7.1$  Hz, 3H), 1.18 (t,  $J = 7.1$  Hz, 3H);  $^{13}\text{C}$  NMR (75 MHz,  $\text{CDCl}_3$ )  $\delta$  173.0, 168.8, 164.4, 146.4, 141.0, 135.0, 133.7, 128.3, 127.9, 126.7, 125.8, 71.5, 61.2, 60.8, 53.2, 43.6, 30.5, 22.7, 14.2, 14.0.

**7b** (minor isomer):  $^1\text{H}$  NMR (300 MHz,  $\text{CDCl}_3$ )  $\delta$  6.81 (s, 1H), 5.14 (s, 1H), 2.65–2.45 (m, 1H), 2.07 (s, 3H), 1.31 (t,  $J = 7.1$  Hz, 3H), 1.10 (t,  $J = 7.1$  Hz, 3H);  $^{13}\text{C}$  NMR (75 MHz,  $\text{CDCl}_3$ )  $\delta$  167.8, 165.5, 137.2, 136.1, 127.4, 127.3, 61.3, 60.6, 30.7, 14.1, 13.8.

**(7E,9Z)**-Diethyl 7-Methyl-1-oxo-5-(*p*-tolyl)-2,3,5,6-tetrahydro-1*H*-pyrazolo[1,2-*a*][1,2]diazocine-6,8-dicarboxylate (**7c**); **(6E,8E)**-Diethyl 7-Methyl-1-oxo-5-(*p*-tolyl)-2,3,5,10-tetrahydro-1*H*-pyrazolo[1,2-*a*][1,2]diazocine-6,8-dicarboxylate (**8c**)

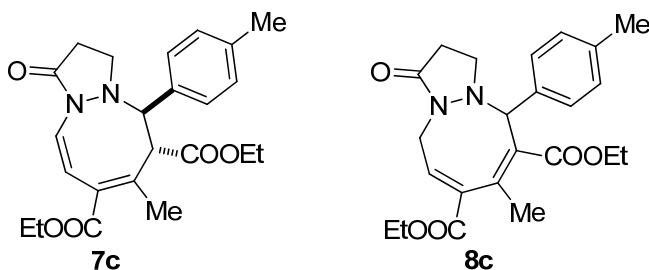

**7c** + **8c**: 64% yield; yellow solid. IR (film)  $\nu_{\text{max}}$  2980, 1716, 1699, 1652, 1557, 1541, 1508, 1417, 1395, 1366, 1240, 1200, 1097, 1040, 762, 668  $\text{cm}^{-1}$ ; HRMS (ESI) calcd for  $\text{C}_{23}\text{H}_{29}\text{N}_2\text{O}_5^+$   $[\text{M} + \text{H}]^+$  413.2071, found 413.2081.

**8c** (major isomer):  $^1\text{H}$  NMR (300 MHz,  $\text{CDCl}_3$ )  $\delta$  7.33–6.94 (m, 1H), 6.18 (dd,  $J = 5.1, 4.0$  Hz, 2H), 5.40 (s, 1H), 4.63 (dd,  $J = 17.9, 3.9$  Hz, 1H), 4.35–4.18 (m, 2H), 4.17–3.95 (m, 2H), 3.91–3.64 (m, 2H), 3.37 (ddd,  $J = 11.6, 8.9, 2.3$  Hz, 1H), 2.88–2.64 (m, 1H), 2.27 (s, 3H), 2.26–2.19 (m, 1H), 2.13 (s, 3H), 1.36 (t,  $J = 7.2$  Hz, 3H), 1.20 (t,  $J = 7.1$  Hz, 3H);  $^{13}\text{C}$  NMR (75 MHz,  $\text{CDCl}_3$ )  $\delta$  173.0, 168.9, 164.5, 145.4, 137.9, 136.3, 135.4, 133.6, 129.0, 128.7, 125.9, 71.4, 61.2, 60.8, 52.9, 43.6, 30.5, 22.7, 21.0, 14.1, 13.8.

**7c** (minor isomer):  $^1\text{H}$  NMR (300 MHz,  $\text{CDCl}_3$ )  $\delta$  6.82 (s, 1H), 5.05 (s, 1H), 2.65–2.45 (m, 1H), 2.32 (s, 3H), 2.06 (s, 3H), 1.31 (t,  $J = 7.2$  Hz, 3H), 1.13 (t,  $J = 7.1$  Hz, 3H);  $^{13}\text{C}$  NMR (75 MHz,  $\text{CDCl}_3$ )  $\delta$  173.0, 168.9, 164.5, 137.0, 136.1, 134.1, 127.1, 61.3, 60.7, 30.8, 21.0, 14.1, 13.8.

(7*E*,9*Z*)-Diethyl 5-(4-Isopropylphenyl)-7-methyl-1-oxo-2,3,5,6-tetrahydro-1*H*-pyrazolo[1,2-*a*][1,2]diazocine-6,8-dicarboxylate (**7d**); (6*E*,8*E*)-Diethyl 5-(4-Isopropylphenyl)-7-methyl-1-oxo-2,3,5,10-tetrahydro-1*H*-pyrazolo[1,2-*a*][1,2]diazocine-6,8-dicarboxylate (**8d**)

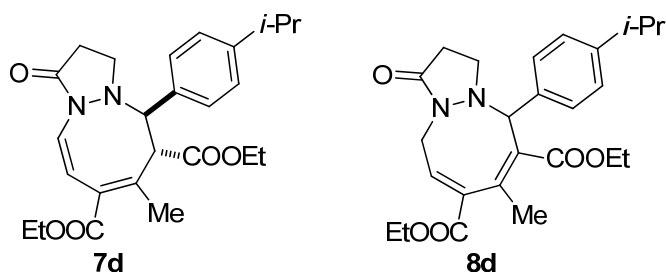

**7d** + **8d**: 67% yield; yellow solid. IR (film)  $\nu_{\max}$  2960, 1716, 1698, 1652, 1567, 1541, 1508, 1457, 1417, 1396, 1365, 1240, 1198, 1097, 1040, 755  $\text{cm}^{-1}$ ; HRMS (ESI) calcd for  $\text{C}_{25}\text{H}_{33}\text{N}_2\text{O}_5^+$   $[\text{M} + \text{H}]^+$  441.2384, found 441.2385.

**8d** (major isomer):  $^1\text{H}$  NMR (300 MHz,  $\text{CDCl}_3$ )  $\delta$  7.30 (d,  $J = 7.7$  Hz, 1H), 7.22–7.13 (m, 2H), 7.05 (d,  $J = 8.2$  Hz, 1H), 6.19 (dd,  $J = 5.1, 3.9$  Hz, 1H), 5.43 (s, 1H), 4.65 (dd,  $J = 18.0, 3.8$  Hz, 1H), 4.37–3.95 (m, 4H), 3.90–3.66 (m, 2H), 2.80–2.90 (m, 2H), 2.36–2.17 (m, 1H), 2.14 (s, 3H), 1.37–1.28 (m, 3H), 1.27–1.16 (m, 9H);  $^{13}\text{C}$  NMR (75 MHz,  $\text{CDCl}_3$ )  $\delta$  173.0, 168.8, 164.4, 147.4, 145.6, 138.3, 135.3, 133.6, 126.4, 126.0, 125.9, 71.4, 61.1, 60.8, 53.0, 43.6, 33.6, 30.5, 24.0, 23.9, 22.7, 14.2, 14.0.

**7d** (minor isomer):  $^1\text{H}$  NMR (300 MHz,  $\text{CDCl}_3$ )  $\delta$  6.83 (s, 1H), 5.02 (s, 1H), 2.67–2.47 (m, 1H), 2.05 (s, 3H), 1.09 (t,  $J = 7.1$  Hz, 3H);  $^{13}\text{C}$  NMR (75 MHz,  $\text{CDCl}_3$ )  $\delta$  168.0, 165.5, 148.1, 145.6, 136.1, 134.5, 127.2, 61.3, 60.6, 33.7, 30.8, 29.6, 23.9, 23.9, 14.1, 13.8.

(7*E*,9*Z*)-Diethyl 5-(4-Methoxyphenyl)-7-methyl-1-oxo-2,3,5,6-tetrahydro-1*H*-pyrazolo[1,2-*a*][1,2]diazocine-6,8-dicarboxylate (**7e**); (6*E*,8*E*)-Diethyl 5-(4-Methoxyphenyl)-7-methyl-1-oxo-2,3,5,10-tetrahydro-1*H*-pyrazolo[1,2-*a*][1,2]diazocine-6,8-dicarboxylate (**8e**)

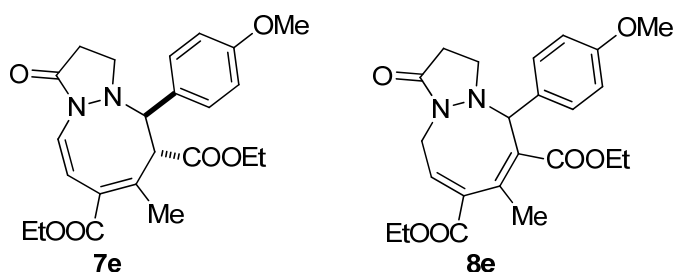

**7e** + **8e**: 76% yield; yellow solid. IR (film)  $\nu_{\max}$  2930, 1719, 1699, 1608, 1541, 1506, 1457, 1366, 1338, 1277, 1251, 1201, 1143, 1110, 1074, 1046, 931, 772, 742  $\text{cm}^{-1}$ ; HRMS (ESI) calcd for  $\text{C}_{23}\text{H}_{29}\text{N}_2\text{O}_6^+$   $[\text{M} + \text{H}]^+$  429.2020, found 429.2022.

**8e** (major isomer):  $^1\text{H}$  NMR (300 MHz,  $\text{CDCl}_3$ )  $\delta$  7.29 (dt,  $J = 3.0, 1.5$  Hz, 2H), 6.77–6.70 (m, 2H), 6.22 (dd,  $J = 5.2, 4.2$  Hz, 1H), 5.34 (s, 1H), 4.60 (dd,  $J = 17.7, 4.2$  Hz, 1H), 4.34–4.20 (m, 2H), 4.07 (tt,  $J = 14.2, 7.1, 3.5$  Hz, 2H), 3.85 (dd,  $J = 17.7, 5.3$  Hz, 1H), 3.76 (s, 3H), 3.72–3.61 (m, 1H), 3.35 (ddd,  $J = 11.6, 8.8, 2.5$  Hz, 1H), 2.76 (ddd,  $J = 16.8, 11.9, 8.9$  Hz, 1H), 2.37–2.15 (m, 1H), 2.12 (s, 3H), 1.34 (t,  $J = 7.1$  Hz, 3H), 1.21 (t,  $J = 7.1$  Hz, 3H);  $^{13}\text{C}$  NMR (75 MHz,  $\text{CDCl}_3$ )  $\delta$  173.0, 168.9, 164.6, 158.6, 144.6, 135.7, 133.4, 132.9, 127.3, 113.8, 113.4, 71.2, 61.2, 60.9, 55.2, 52.7, 43.6, 30.5, 22.7, 14.2, 14.1.

**7e** (minor isomer):  $^1\text{H}$  NMR (300 MHz,  $\text{CDCl}_3$ )  $\delta$  7.19 (d,  $J = 8.5$  Hz, 2H), 6.85 (d,  $J = 8.9$  Hz, 2H), 5.01 (s, 1H), 3.79 (s, 3H), 2.66–2.37 (m, 1H), 2.04 (s, 3H), 1.32 (t,  $J = 7.1$  Hz, 3H), 1.14 (t,  $J = 7.1$  Hz, 3H);  $^{13}\text{C}$  NMR (75 MHz,  $\text{CDCl}_3$ )  $\delta$  168.1, 165.5, 162.3, 158.8, 136.0, 129.1, 128.52, 128.46, 100.0, 61.3, 60.7, 55.2, 30.8, 14.1, 13.9.

**(7E,9Z)**-Diethyl 5-(4-Fluorophenyl)-7-methyl-1-oxo-2,3,5,6-tetrahydro-1H-pyrazolo[1,2-a][1,2]diazocine-6,8-dicarboxylate (**7f**); **(6E,8E)**-Diethyl 5-(4-Fluorophenyl)-7-methyl-1-oxo-2,3,5,10-tetrahydro-1H-pyrazolo[1,2-a][1,2]diazocine-6,8-dicarboxylate (**8f**)

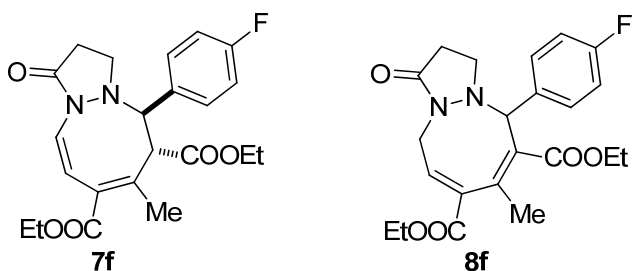

**7f** + **8f**: 68% yield; yellow solid. IR (film)  $\nu_{\max}$  2931, 1715, 1699, 1614, 1567, 1541, 1417, 1396, 1367, 1242, 1096, 1039, 862, 758  $\text{cm}^{-1}$ ; HRMS (ESI) calcd for  $\text{C}_{22}\text{H}_{26}\text{FN}_2\text{O}_5^+$   $[\text{M} + \text{H}]^+$  417.1820, found 417.1812.

**8f** (major isomer):  $^1\text{H}$  NMR (300 MHz,  $\text{CDCl}_3$ )  $\delta$  7.38 (dd,  $J = 7.9, 5.5$  Hz, 1H), 6.87 (dd,  $J = 17.7, 9.0$  Hz, 1H), 6.15 (dd,  $J = 4.9, 3.6$  Hz, 1H), 5.39 (d,  $J = 26.0$  Hz, 1H), 4.71 (dd,  $J = 18.4, 3.5$  Hz, 1H), 4.38–4.27 (m, 1H), 4.14–3.99 (m, 2H), 3.87–3.68 (m, 1H), 3.48–3.36 (m, 1H), 2.75 (ddd,  $J = 16.8, 12.2, 9.0$  Hz, 1H), 2.39–2.17 (m, 1H), 2.15 (s, 1H), 1.36 (t,  $J = 7.1$  Hz, 2H), 1.20 (t,  $J = 7.2$  Hz, 2H);  $^{13}\text{C}$  NMR (75 MHz,  $\text{CDCl}_3$ )  $\delta$  173.1, 168.8, 164.4, 161.7, 146.7, 136.8, 135.1, 133.8, 127.4, 115.3, 114.7, 71.0, 61.4, 61.0, 53.3, 43.8, 30.4, 22.8, 14.2, 14.0.

**7f** (minor isomer):  $^1\text{H}$  NMR (300 MHz,  $\text{CDCl}_3$ )  $\delta$  7.29–7.20 (m, 2H), 7.02 (t,  $J = 8.7$  Hz, 2H), 6.81 (s, 1H), 5.12 (s, 1H), 4.28–4.16 (m, 1H), 2.66–2.46 (m, 1H), 2.08 (s, 3H), 1.32 (t,  $J = 7.1$  Hz, 3H), 1.15 (t,  $J = 7.1$  Hz, 3H);  $^{13}\text{C}$  NMR (75 MHz,  $\text{CDCl}_3$ )  $\delta$  167.8, 165.5, 136.2, 133.0, 61.4, 60.8, 30.6, 14.1, 13.9.

**(7E,9Z)-Diethyl 5-(4-Chlorophenyl)-7-methyl-1-oxo-2,3,5,6-tetrahydro-1H-pyrazolo[1,2-a][1,2]diazocine-6,8-dicarboxylate (7g); (6E,8E)-Diethyl 5-(4-Chlorophenyl)-7-methyl-1-oxo-2,3,5,10-tetrahydro-1H-pyrazolo[1,2-a][1,2]diazocine-6,8-dicarboxylate (8g)**

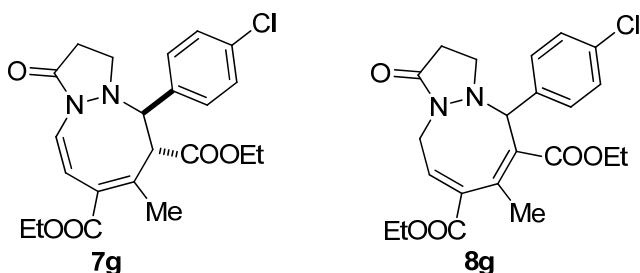

**7g + 8g:** 63% yield; yellow solid. IR (film)  $\nu_{\text{max}}$  2980, 1715, 1698, 1647, 1636, 1557, 1541, 1521, 1508, 1489, 1473, 1456, 1418, 1396, 1241  $\text{cm}^{-1}$ ; HRMS (ESI) calcd for  $\text{C}_{22}\text{H}_{26}\text{ClN}_2\text{O}_5^+$   $[\text{M} + \text{H}]^+$  433.1525, found 433.1527.

**8g** (major isomer):  $^1\text{H}$  NMR (300 MHz,  $\text{CDCl}_3$ )  $\delta$  7.48–7.11 (m, 1H), 6.14 (dd,  $J = 5.0, 3.6$  Hz, 1H), 5.49 (s, 1H), 4.70 (dd,  $J = 18.3, 3.6$  Hz, 1H), 4.31 (q,  $J = 7.1$  Hz, 2H), 4.13–3.94 (m, 2H), 3.88–3.68 (m, 1H), 3.50–3.35 (m, 1H), 2.75 (ddd,  $J = 16.7, 12.2, 9.0$  Hz, 1H), 2.37–2.18 (m, 1H), 2.16 (s, 3H), 1.36 (t,  $J = 7.1$  Hz, 3H), 1.19 (t,  $J = 7.1$  Hz, 3H);  $^{13}\text{C}$  NMR (75 MHz,  $\text{CDCl}_3$ )  $\delta$  173.1, 168.8, 164.4, 146.4, 141.0, 135.1, 133.8, 128.4, 128.0, 126.7, 125.8, 71.5, 61.2, 60.8, 53.2, 43.7, 30.5, 22.8, 14.2, 14.0.

**7g** (minor isomer):  $^1\text{H}$  NMR (300 MHz,  $\text{CDCl}_3$ )  $\delta$  6.82 (s, 1H), 5.14 (s, 1H), 4.27–4.16 (m, 2H), 2.67–2.47 (m, 1H), 2.08 (s, 3H), 1.32 (t,  $J = 7.1$  Hz, 3H), 1.11 (t,  $J = 7.1$  Hz, 3H);  $^{13}\text{C}$  NMR (75 MHz,  $\text{CDCl}_3$ )  $\delta$  167.8, 165.5, 137.3, 136.2, 127.5, 127.3, 61.3, 60.7, 30.7, 14.1, 13.8.

(7*E*,9*Z*)-Diethyl 5-(4-Bromophenyl)-7-methyl-1-oxo-2,3,5,6-tetrahydro-1*H*-pyrazolo[1,2-*a*][1,2]diazocine-6,8-dicarboxylate (**7h**); (6*E*,8*E*)-Diethyl 5-(4-Bromophenyl)-7-methyl-1-oxo-2,3,5,10-tetrahydro-1*H*-pyrazolo[1,2-*a*][1,2]diazocine-6,8-dicarboxylate (**8h**)

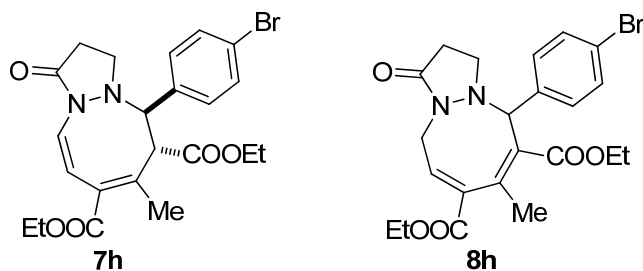

**7h** + **8h**: 77% yield; yellow solid. IR (film)  $\nu_{\max}$  2924, 2853, 1715, 1699, 1652, 1557, 1541, 1522, 1508, 1488, 1456, 1396, 1243, 1097, 1038, 1010, 822  $\text{cm}^{-1}$ ; HRMS (ESI) calcd for  $\text{C}_{22}\text{H}_{26}\text{BrN}_2\text{O}_5^+$   $[\text{M} + \text{H}]^+$  477.1020, found 477.1013.

**8h** (major isomer):  $^1\text{H}$  NMR (300 MHz,  $\text{CDCl}_3$ )  $\delta$  7.34–7.26 (m, 4H), 6.13 (dd,  $J = 4.9, 3.3$  Hz, 1H), 5.45 (s, 1H), 4.75 (dd,  $J = 18.6, 3.3$  Hz, 1H), 4.37–4.28 (m, 2H), 4.15–3.95 (m, 2H), 3.83 (td,  $J = 12.1, 8.6$  Hz, 1H), 3.71 (dd,  $J = 18.6, 4.9$  Hz, 1H), 3.51–3.38 (m, 1H), 2.73 (ddd,  $J = 16.8, 12.4, 8.9$  Hz, 1H), 2.34–2.19 (m, 1H), 2.17 (s, 3H), 1.37 (t,  $J = 7.1$  Hz, 3H), 1.19 (t,  $J = 7.1$  Hz, 3H);  $^{13}\text{C}$  NMR (75 MHz,  $\text{CDCl}_3$ )  $\delta$  173.1, 168.7, 164.2, 147.6, 140.4, 134.9, 133.9, 131.5, 131.0, 127.6, 126.7, 120.4, 70.9, 61.4, 61.0, 53.6, 43.7, 30.4, 22.8, 14.2, 14.0.

**7h** (minor isomer):  $^1\text{H}$  NMR (300 MHz,  $\text{CDCl}_3$ )  $\delta$  7.45 (d,  $J = 8.6$  Hz, 1H), 7.17 (d,  $J = 8.1$  Hz, 1H), 6.80 (s, 1H), 5.15 (s, 1H), 4.27–4.18 (m, 2H), 2.64–2.46 (m, 1H), 2.10 (s, 3H), 1.32 (t,  $J = 7.1$  Hz, 3H), 1.16 (t,  $J = 7.2$  Hz, 3H);  $^{13}\text{C}$  NMR (75 MHz,  $\text{CDCl}_3$ )  $\delta$  167.6, 165.4, 136.4, 136.2, 128.6, 121.1, 70.9, 60.8, 30.6, 14.1, 13.9.

At  $-10$   $^\circ\text{C}$ , only the isomer **7h** exists in  $\text{CD}_2\text{Cl}_2$  solution:  $^1\text{H}$  NMR (300 MHz,  $\text{CD}_2\text{Cl}_2$ )  $\delta$  7.60–7.49 (m, 2H), 7.39 (d,  $J = 6.8$  Hz, 1H), 7.08 (d,  $J = 8.1$  Hz, 1H), 6.89 (d,  $J = 10.4$  Hz, 1H), 5.37 (s, 1H), 4.38–4.16 (m, 3H), 4.03–3.85 (m, 3H), 3.62–3.43 (m, 1H), 3.31–3.16 (m, 1H), 2.04 (s, 3H), 1.82–1.74 (m, 1H), 1.33 (t,  $J = 7.1$  Hz, 3H), 1.08 (t,  $J = 7.2$  Hz, 3H), 1.03–0.93 (m, 1H).

**(7E,9Z)-Diethyl 5-(4-Cyanophenyl)-7-methyl-1-oxo-2,3,5,6-tetrahydro-1H-pyrazolo[1,2-a][1,2]diazocine-6,8-dicarboxylate (7i); (6E,8E)-Diethyl 5-(4-Cyanophenyl)-7-methyl-1-oxo-2,3,5,10-tetrahydro-1H-pyrazolo[1,2-a][1,2]diazocine-6,8-dicarboxylate (8i)**

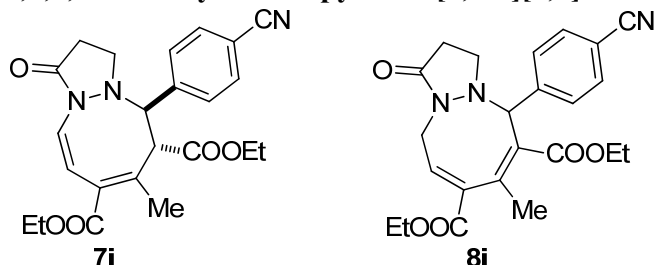

**7i + 8i:** 51% yield; yellow solid. IR (film)  $\nu_{\max}$  2923, 1715, 1697, 1652, 1636, 1557, 1541, 1521, 1507, 1489, 1473, 1456, 1418, 1396, 1242, 1039, 855, 737  $\text{cm}^{-1}$ ; HRMS (ESI) calcd for  $\text{C}_{23}\text{H}_{26}\text{N}_3\text{O}_5^+$   $[\text{M} + \text{H}]^+$  424.1867, found 424.1857.

**8i** (major isomer):  $^1\text{H}$  NMR (300 MHz,  $\text{CDCl}_3$ )  $\delta$  7.56 (d,  $J = 7.9$  Hz, 2H), 7.48 (d,  $J = 8.6$  Hz, 2H), 6.04 (dt,  $J = 18.1, 9.1$  Hz, 1H), 5.59 (s, 1H), 4.84 (dd,  $J = 19.1, 2.8$  Hz, 1H), 4.35 (q,  $J = 7.1$  Hz, 2H), 4.16–3.82 (m, 2H), 3.64 (dd,  $J = 19.1, 4.8$  Hz, 1H), 3.53–3.44 (m, 1H), 2.70 (ddd,  $J = 16.8, 12.7, 9.0$  Hz, 1H), 2.31–2.22 (m, 1H), 2.19 (s, 3H), 1.38 (t,  $J = 7.1$  Hz, 3H), 1.17 (t,  $J = 7.1$  Hz, 3H);  $^{13}\text{C}$  NMR (75 MHz,  $\text{CDCl}_3$ )  $\delta$  173.1, 168.5, 163.9, 149.2, 147.1, 134.6, 134.2, 132.1, 131.8, 126.4, 125.7, 118.7, 110.4, 71.2, 61.6, 61.1, 54.0, 43.8, 30.3, 22.8, 14.2, 14.0.

**7i** (minor isomer):  $^1\text{H}$  NMR (300 MHz,  $\text{CDCl}_3$ )  $\delta$  7.62 (d,  $J = 8.5$  Hz, 2H), 7.41 (d,  $J = 7.7$  Hz, 2H), 6.77 (t,  $J = 3.6$  Hz, 1H), 5.37 (s, 1H), 4.30–4.16 (m, 2H), 2.61–2.38 (m, 1H), 2.16 (s, 3H), 1.31 (t,  $J = 7.1$  Hz, 3H), 1.15 (t,  $J = 7.1$  Hz, 3H);  $^{13}\text{C}$  NMR (75 MHz,  $\text{CDCl}_3$ )  $\delta$  167.2, 165.3, 143.2, 136.4, 127.4, 118.5, 111.0, 61.5, 61.0, 43.1, 30.4, 22.1, 14.1, 13.9.

**(7E,9Z)-Diethyl 7-Methyl-5-(3-nitrophenyl)-1-oxo-2,3,5,6-tetrahydro-1H-pyrazolo[1,2-a][1,2]diazocine-6,8-dicarboxylate (7k); (6E,8E)-Diethyl 7-Methyl-5-(3-nitrophenyl)-1-oxo-2,3,5,10-tetrahydro-1H-pyrazolo[1,2-a][1,2]diazocine-6,8-dicarboxylate (8k)**

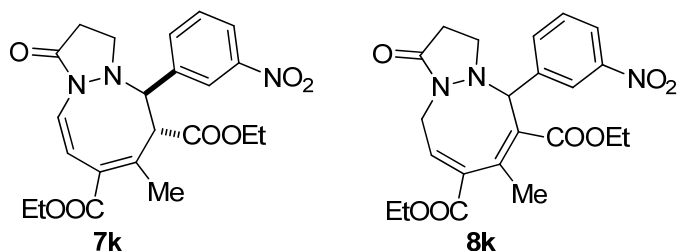

**7k + 8k:** 77% yield; yellow solid. IR (film)  $\nu_{\max}$  2918, 1716, 1698, 1683, 1647, 1557, 1541, 1522, 1508, 1457, 669  $\text{cm}^{-1}$ ; HRMS (ESI) calcd for  $\text{C}_{22}\text{H}_{26}\text{N}_3\text{O}_7^+$   $[\text{M} + \text{H}]^+$  444.1765, found 444.1762.



**8k** (major isomer):  $^1\text{H}$  NMR (300 MHz,  $\text{CDCl}_3$ )  $\delta$  8.38 (t,  $J = 2.5$  Hz, 1H), 8.06–7.97 (m, 1H), 7.73 (dd,  $J = 7.8, 1.6$  Hz, 1H), 7.37 (t,  $J = 8.0$  Hz, 1H), 6.05 (dt,  $J = 23.7, 11.8$  Hz, 1H), 5.64 (s, 1H), 4.86 (dd,  $J = 19.2, 2.8$  Hz, 1H), 4.36 (p,  $J = 7.2$  Hz, 2H), 4.08–3.81 (m, 3H), 3.67 (dd,  $J = 19.2, 4.7$  Hz, 1H), 3.58–3.41 (m, 1H), 2.72 (ddd,  $J = 16.8, 12.6, 8.9$  Hz, 1H), 2.30 (dd,  $J = 15.1, 7.6$  Hz, 1H), 2.21 (s, 3H), 1.41 (t,  $J = 7.1$  Hz, 3H), 1.16 (t,  $J = 7.1$  Hz, 3H);  $^{13}\text{C}$  NMR (75 MHz,  $\text{CDCl}_3$ )  $\delta$  173.1, 168.5, 164.0, 149.4, 148.2, 144.0, 134.6, 134.4, 131.8, 128.9, 125.6, 121.8, 120.7, 70.8, 61.7, 61.2, 54.1, 44.0, 30.4, 23.0, 14.2, 13.9.

**7k** (minor isomer):  $^1\text{H}$  NMR (300 MHz,  $\text{CDCl}_3$ )  $\delta$  8.21 (s, 1H), 8.17–8.09 (m, 1H), 7.64 (d,  $J = 7.8$  Hz, 1H), 7.51 (t,  $J = 8.0$  Hz, 1H), 6.79 (t,  $J = 3.6$  Hz, 1H), 5.41 (s, 1H), 4.31–4.18 (m, 2H), 4.18–4.08 (m, 2H), 2.62–2.48 (m, 1H), 2.17 (s, 3H), 1.33 (t,  $J = 7.1$  Hz, 3H), 1.20 (t,  $J = 7.1$  Hz, 3H);  $^{13}\text{C}$  NMR (75 MHz,  $\text{CDCl}_3$ )  $\delta$  167.4, 165.4, 148.4, 139.8, 136.5, 132.9, 129.3, 122.2, 61.5, 61.1, 22.1, 14.1.

**(7E,9Z)-Diethyl 7-Methyl-5-(2-nitrophenyl)-1-oxo-2,3,5,6-tetrahydro-1H-pyrazolo[1,2-a][1,2]diazocine-6,8-dicarboxylate (71); (6E,8E)-Diethyl 7-Methyl-5-(2-nitrophenyl)-1-oxo-2,3,5,10-tetrahydro-1H-pyrazolo[1,2-a][1,2]diazocine-6,8-dicarboxylate (81)**

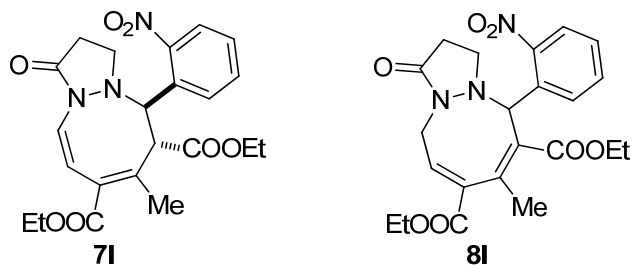

**71 + 81:** 73% yield; yellow solid. IR (film)  $\nu_{\text{max}}$  2918, 2860, 1716, 1697, 1652, 1567, 1526, 1508, 1457, 1418, 1396, 1362, 1265, 1040, 739, 704  $\text{cm}^{-1}$ ; HRMS (ESI) calcd for  $\text{C}_{22}\text{H}_{26}\text{N}_3\text{O}_7$  [ $\text{M} + \text{H}$ ] $^+$  444.1765, found 444.1757.

**81** (major isomer):  $^1\text{H}$  NMR (300 MHz,  $\text{CDCl}_3$ )  $\delta$  8.02 (d,  $J = 8.0$  Hz, 1H), 7.68 (dd,  $J = 8.0, 1.3$  Hz, 1H), 7.46 (td,  $J = 7.8, 1.3$  Hz, 1H), 7.31 (m, 1H), 6.26 (dd,  $J = 5.3, 3.0$  Hz, 1H), 4.78 (dd,  $J = 18.6, 3.0$  Hz, 1H), 4.41–4.27 (m, 2H), 4.09 (dq,  $J = 10.8, 7.1$  Hz, 1H), 3.97–3.73 (m, 3H), 3.71–3.58 (m, 1H), 3.02 (ddd,  $J = 16.6, 12.8, 8.8$  Hz, 1H), 2.22 (dt,  $J = 14.9, 7.5$  Hz, 1H), 2.10 (s, 3H), 1.40 (t,  $J = 7.1$  Hz, 3H), 1.22 (t,  $J = 7.1$  Hz, 3H);  $^{13}\text{C}$  NMR (75 MHz,  $\text{CDCl}_3$ )  $\delta$  173.9, 168.3,

164.0, 148.2, 147.0, 136.2, 135.0, 134.3, 131.6, 129.5, 127.6, 127.1, 124.5, 69.0, 61.4, 61.0, 54.7, 43.8, 30.3, 22.6, 14.1, 13.8.

**7l** (minor isomer):  $^1\text{H}$  NMR (300 MHz,  $\text{CDCl}_3$ )  $\delta$  6.93 (s, 1H), 4.27–4.17 (m, 2H), 2.71–2.55 (m, 1H), 1.35 (t,  $J = 7.1$  Hz, 2H), 1.05 (t,  $J = 7.1$  Hz, 2H).

**(7E,9Z)-Diethyl 7-Methyl-5-(naphthalen-2-yl)-1-oxo-2,3,5,6-tetrahydro-1H-pyrazolo[1,2-a][1,2]diazocine-6,8-dicarboxylate (7p)**; **(6E,8E)-Diethyl 7-Methyl-5-(naphthalen-2-yl)-1-oxo-2,3,5,10-tetrahydro-1H-pyrazolo[1,2-a][1,2]diazocine-6,8-dicarboxylate (8p)**

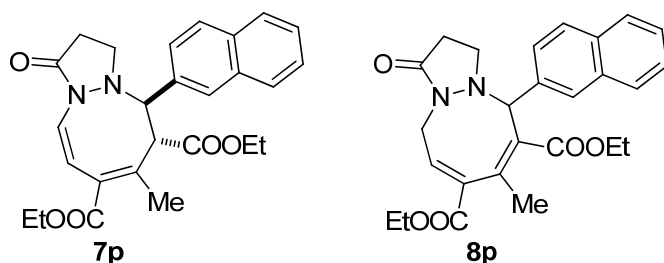

**7p + 8p**: 76% yield; yellow solid. IR (film)  $\nu_{\text{max}}$  2940, 1715, 1697, 1662, 1557, 1541, 1521, 1508, 1473, 1456, 1417, 1396, 1363, 1231, 1198, 1039  $\text{cm}^{-1}$ ; HRMS (ESI) calcd for  $\text{C}_{26}\text{H}_{29}\text{N}_2\text{O}_5$   $[\text{M} + \text{H}]^+$  449.2098, found 449.2085.

**8p** (major isomer):  $^1\text{H}$  NMR (300 MHz,  $\text{CDCl}_3$ )  $\delta$  7.96–7.63 (m, 4H), 7.60–7.34 (m, 3H), 6.14–6.00 (m, 1H), 5.67 (s, 1H), 4.71 (dd,  $J = 18.2, 3.6$  Hz, 1H), 4.42–4.21 (m, 2H), 4.06 (dt,  $J = 14.0, 5.3$  Hz, 1H), 3.95–3.73 (m, 2H), 3.55–3.42 (m, 1H), 2.81 (ddd,  $J = 16.8, 12.3, 9.0$  Hz, 1H), 2.30 (ddd,  $J = 11.9, 10.3, 5.1$  Hz, 1H), 2.20 (s, 3H), 1.39 (t,  $J = 7.1$  Hz, 3H), 0.96 (t,  $J = 7.1$  Hz, 3H);  $^{13}\text{C}$  NMR (75 MHz,  $\text{CDCl}_3$ )  $\delta$  173.1, 168.8, 164.2, 138.5, 135.2, 133.6, 133.0, 132.5, 127.8, 127.7, 127.43, 125.9, 125.5, 124.4, 124.4, 71.6, 61.3, 60.7, 53.2, 43.7, 30.5, 30.5, 22.8, 14.2, 13.7.

**7p** (minor isomer):  $^1\text{H}$  NMR (300 MHz,  $\text{CDCl}_3$ )  $\delta$  6.87 (s, 1H), 5.31 (s, 1H), 2.71–2.52 (m, 1H), 2.12 (s, 3H), 1.35 (t,  $J = 7.1$  Hz, 5H);  $^{13}\text{C}$  NMR (75 MHz,  $\text{CDCl}_3$ )  $\delta$  167.9, 167.6, 165.5, 146.9, 136.3, 134.7, 133.1, 132.3, 130.8, 128.8, 128.0, 127.8, 127.5, 127.4, 126.2, 126.0, 125.1, 70.9, 65.6, 61.3, 30.7, 30.5, 19.0, 14.1, 13.8, 13.6.

(7*E*,9*Z*)-Diethyl 5-(3-Fluorophenyl)-7-methyl-1-oxo-2,3,5,6-tetrahydro-1*H*-pyrazolo[1,2-*a*][1,2]diazocine-6,8-dicarboxylate (**7v**); (6*E*,8*E*)-Diethyl 5-(3-Fluorophenyl)-7-methyl-1-oxo-2,3,5,10-tetrahydro-1*H*-pyrazolo[1,2-*a*][1,2]diazocine-6,8-dicarboxylate (**8v**)

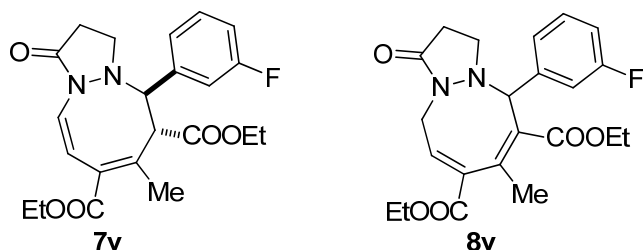

**7v** + **8v**: 79% yield; yellow solid. IR (film)  $\nu_{\max}$  2982, 2934, 1718, 1698, 1615, 1588, 1541, 1508, 1486, 1438, 1416, 1395, 1367, 1243, 1198, 1065, 1040, 870, 757, 686  $\text{cm}^{-1}$ ; HRMS (ESI) calcd for  $\text{C}_{22}\text{H}_{26}\text{FN}_2\text{O}_5^+$   $[\text{M} + \text{H}]^+$  417.1820, found 417.1831.

**8v** (major isomer):  $^1\text{H}$  NMR (300 MHz,  $\text{CDCl}_3$ )  $\delta$  7.35–6.75 (m, 4H), 6.12 (dd,  $J = 4.8, 3.1$  Hz, 1H), 5.53 (s, 1H), 4.79 (dd,  $J = 18.8, 3.1$  Hz, 1H), 4.34 (q,  $J = 7.1$  Hz, 2H), 4.17–3.95 (m, 2H), 3.87 (td,  $J = 12.2, 8.6$  Hz, 1H), 3.72 (dd,  $J = 18.8, 4.8$  Hz, 1H), 3.53–3.39 (m, 1H), 2.72 (ddd,  $J = 16.9, 12.5, 9.0$  Hz, 1H), 2.34–2.20 (m, 1H), 2.19 (s, 3H), 1.38 (t,  $J = 7.1$  Hz, 3H), 1.21 (t,  $J = 7.1$  Hz, 3H);  $^{13}\text{C}$  NMR (75 MHz,  $\text{CDCl}_3$ )  $\delta$  173.1, 168.6, 164.2, 162.8, 148.1, 144.2, 136.3, 134.6, 134.0, 129.4, 126.2, 121.2, 113.4, 112.7, 71.02, 71.00, 61.4, 61.0, 53.6, 43.8, 30.6, 30.4, 22.9, 14.2, 13.9.

**7v** (minor isomer):  $^1\text{H}$  NMR (300 MHz,  $\text{CDCl}_3$ )  $\delta$  5.25 (s, 1H), 4.28–4.21 (m, 2H), 2.63–2.37 (m, 1H), 2.12 (s, 3H), 1.32 (t,  $J = 7.1$  Hz, 3H), 1.17 (t,  $J = 7.1$  Hz, 3H);  $^{13}\text{C}$  NMR (75 MHz,  $\text{CDCl}_3$ )  $\delta$  167.6, 165.4, 140.0, 136.3, 129.8, 122.5, 114.2, 113.9, 60.8, 53.6, 43.8, 30.6, 14.1, 13.8.

(7*E*,9*Z*)-Diethyl 5-(3-Chlorophenyl)-7-methyl-1-oxo-2,3,5,6-tetrahydro-1*H*-pyrazolo[1,2-*a*][1,2]diazocine-6,8-dicarboxylate (**7w**); (6*E*,8*E*)-Diethyl 5-(3-Chlorophenyl)-7-methyl-1-oxo-2,3,5,10-tetrahydro-1*H*-pyrazolo[1,2-*a*][1,2]diazocine-6,8-dicarboxylate (**8w**)

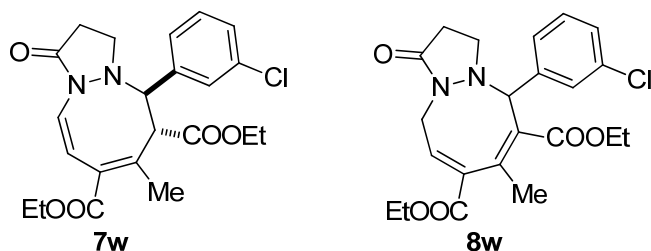

**7w** + **8w**: 82% yield; yellow solid. IR (film)  $\nu_{\max}$  2981, 1715, 1698, 1652, 1594, 1570, 1541, 1508, 1473, 1416, 1395, 1366, 1242, 1200, 1039, 792, 749, 686  $\text{cm}^{-1}$ ; HRMS (ESI) calcd for  $\text{C}_{22}\text{H}_{26}\text{ClN}_2\text{O}_5^+$   $[\text{M} + \text{H}]^+$  433.1525, found 433.1522.

**8w** (major isomer):  $^1\text{H}$  NMR (300 MHz,  $\text{CDCl}_3$ )  $\delta$  7.46–7.08 (m, 4H), 6.13 (dd,  $J = 4.8, 3.1$  Hz, 1H), 5.52 (s, 1H), 4.79 (dd,  $J = 18.8, 3.1$  Hz, 1H), 4.40–4.29 (m, 2H), 4.17–3.97 (m, 2H), 3.87 (td,  $J = 12.2, 8.6$  Hz, 1H), 3.71 (dd,  $J = 18.9, 4.8$  Hz, 1H), 3.53–3.41 (m, 1H), 2.35–2.22 (m, 1H), 2.20 (s, 3H), 1.39 (t,  $J = 7.1$  Hz, 3H), 1.22 (t,  $J = 7.1$  Hz, 3H);  $^{13}\text{C}$  NMR (75 MHz,  $\text{CDCl}_3$ )  $\delta$  173.1, 168.6, 164.2, 148.3, 143.5, 134.6, 134.2, 134.0, 129.2, 126.8, 126.1, 125.8, 123.8, 70.9, 61.4, 61.1, 53.6, 43.8, 30.4, 22.9, 14.2, 14.0.

**7w** (minor isomer):  $^1\text{H}$  NMR (300 MHz,  $\text{CDCl}_3$ )  $\delta$  6.80 (s, 1H), 5.23 (s, 1H), 4.23 (ddd,  $J = 11.2, 9.2, 3.8$  Hz, 2H), 3.40–3.27 (m, 1H), 2.64–2.51 (m, 1H), 2.12 (s, 3H), 1.33 (t,  $J = 7.1$  Hz, 3H), 1.18 (t,  $J = 7.1$  Hz, 5H);  $^{13}\text{C}$  NMR (75 MHz,  $\text{CDCl}_3$ )  $\delta$  167.6, 165.4, 139.4, 136.3, 134.4, 129.6, 127.4, 60.9, 30.5, 14.1, 13.8.

**(7E,9Z)**-Diethyl 5-(3-Bromophenyl)-7-methyl-1-oxo-2,3,5,6-tetrahydro-1H-pyrazolo[1,2-a][1,2]diazocine-6,8-dicarboxylate (**7x**); **(6E,8E)**-Diethyl 5-(3-Bromophenyl)-7-methyl-1-oxo-2,3,5,10-tetrahydro-1H-pyrazolo[1,2-a][1,2]diazocine-6,8-dicarboxylate (**8x**)

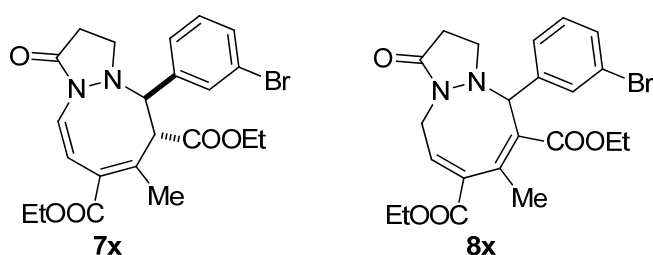

**7x** + **8x**: 75% yield; yellow solid. IR (film)  $\nu_{\max}$  3058, 1715, 1698, 1652, 1558, 1541, 1522, 1508, 1489, 1473, 1357, 1417, 1396, 1364, 1241, 1200, 1039, 747  $\text{cm}^{-1}$ ; HRMS (ESI) calcd for  $\text{C}_{22}\text{H}_{26}\text{BrN}_2\text{O}_5^+$   $[\text{M} + \text{H}]^+$  477.1020, found 477.0997.

**8x** (major isomer):  $^1\text{H}$  NMR (300 MHz,  $\text{CDCl}_3$ )  $\delta$  7.60–6.97 (m, 4H), 6.12 (dd,  $J = 4.8, 3.1$  Hz, 1H), 5.52 (s, 1H), 4.78 (dd,  $J = 18.9, 3.1$  Hz, 1H), 4.34 (q,  $J = 7.1$  Hz, 2H), 4.18–3.97 (m, 2H),

3.86 (td,  $J = 12.3, 8.6$  Hz, 1H), 3.69 (dd,  $J = 18.9, 4.8$  Hz, 1H), 3.54–3.39 (m, 1H), 2.79–2.63 (m, 1H), 2.35–2.22 (m, 1H), 2.19 (s, 3H), 1.38 (t,  $J = 7.1$  Hz, 3H), 1.22 (t,  $J = 7.1$  Hz, 3H);  $^{13}\text{C}$  NMR (75 MHz,  $\text{CDCl}_3$ )  $\delta$  173.0, 168.6, 164.2, 148.3, 143.8, 134.6, 134.0, 129.7, 129.5, 128.7, 126.0, 124.3, 122.4, 70.8, 61.4, 61.2, 53.6, 43.8, 30.4, 22.9, 14.2, 14.0.

**7x** (minor isomer):  $^1\text{H}$  NMR (300 MHz,  $\text{CDCl}_3$ )  $\delta$  6.79 (s, 1H), 5.21 (s, 1H), 4.23 (ddt,  $J = 10.4, 6.7, 3.5$  Hz, 2H), 3.39–3.27 (m, 1H), 2.62–2.52 (m, 1H), 2.11 (s, 3H), 1.32 (t,  $J = 7.1$  Hz, 3H), 1.18 (t,  $J = 7.1$  Hz, 3H);  $^{13}\text{C}$  NMR (75 MHz,  $\text{CDCl}_3$ )  $\delta$  167.6, 165.4, 164.3, 164.2, 139.7, 136.3, 130.3, 129.9, 129.8, 125.5, 122.6, 60.9, 53.6, 42.9, 30.5, 21.7, 14.1, 13.9.

**(7E,9Z)-Diethyl 5-(2-Bromophenyl)-7-methyl-1-oxo-2,3,5,6-tetrahydro-1H-pyrazolo[1,2-a][1,2]diazocine-6,8-dicarboxylate (7y); (6E,8E)-Diethyl 5-(2-Bromophenyl)-7-methyl-1-oxo-2,3,5,10-tetrahydro-1H-pyrazolo[1,2-a][1,2]diazocine-6,8-dicarboxylate (8y)**

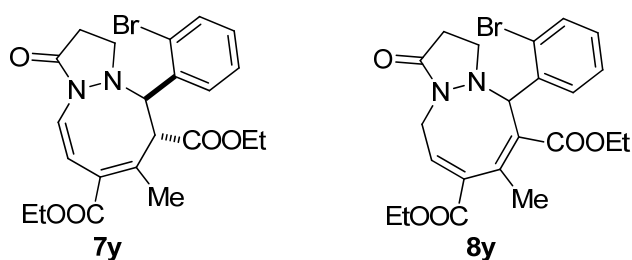

**7y + 8y:** 92% yield; yellow solid. IR (film)  $\nu_{\text{max}}$  3058, 2981, 1715, 1693, 1652, 1566, 1541, 1366, 1252, 1097, 1043, 972, 920, 864, 743, 701, 660, 603  $\text{cm}^{-1}$ ; HRMS (ESI) calcd for  $\text{C}_{22}\text{H}_{26}\text{BrN}_2\text{O}_5^+$   $[\text{M} + \text{H}]^+$  477.1020, found 477.0998.

**8y** (major isomer):  $^1\text{H}$  NMR (300 MHz,  $\text{CDCl}_3$ )  $\delta$  7.74 (ddd,  $J = 9.3, 7.9, 1.5$  Hz, 1H), 7.43 (td,  $J = 8.3, 1.4$  Hz, 1H), 7.24 (td,  $J = 7.8, 1.2$  Hz, 1H), 7.06 (td,  $J = 7.6, 1.6$  Hz, 1H), 6.62 (dd,  $J = 6.7, 5.2$  Hz, 1H), 5.51 (s, 1H), 4.43 (dd,  $J = 15.8, 5.1$  Hz, 1H), 4.36–3.83 (m, 5H), 3.58 (td,  $J = 11.7, 8.0$  Hz, 1H), 3.29–3.01 (m, 2H), 2.26 (ddd,  $J = 16.3, 8.0, 1.7$  Hz, 1H), 2.04 (s, 3H), 1.33 (t,  $J = 7.1$  Hz, 3H), 1.18 (t,  $J = 7.1$  Hz, 3H);  $^{13}\text{C}$  NMR (75 MHz,  $\text{CDCl}_3$ )  $\delta$  173.0, 168.6, 164.2, 148.3, 143.8, 134.6, 134.0, 129.7, 129.5, 128.7, 126.0, 124.3, 122.4, 70.8, 61.4, 61.2, 53.6, 43.8, 30.4, 22.9, 14.2, 14.0.

**7y** (minor isomer):  $^1\text{H}$  NMR (300 MHz,  $\text{CDCl}_3$ )  $\delta$  7.55 (dd,  $J = 8.0, 1.2$  Hz, 1H), 7.37–7.29 (m, 1H), 7.15 (ddd,  $J = 9.1, 6.6, 2.7$  Hz, 1H), 4.98 (s, 1H), 3.00–2.56 (m, 1H), 2.01 (s, 2H), 1.32 (t,  $J = 7.1$  Hz, 6H), 1.00 (t,  $J = 7.1$  Hz, 3H);  $^{13}\text{C}$  NMR (75 MHz,  $\text{CDCl}_3$ )  $\delta$  167.6, 165.4, 139.7, 136.3, 130.3, 129.8, 125.5, 122.6, 60.9, 42.9, 30.5, 29.6, 22.9, 14.1, 13.9.

**(7E,9Z)-Diethyl 5-(2-Chlorophenyl)-7-methyl-1-oxo-2,3,5,6-tetrahydro-1H-pyrazolo[1,2-a][1,2]diazocine-6,8-dicarboxylate (7z)**; **(6E,8E)-Diethyl 5-(2-Chlorophenyl)-7-methyl-1-oxo-2,3,5,10-tetrahydro-1H-pyrazolo[1,2-a][1,2]diazocine-6,8-dicarboxylate (8z)**

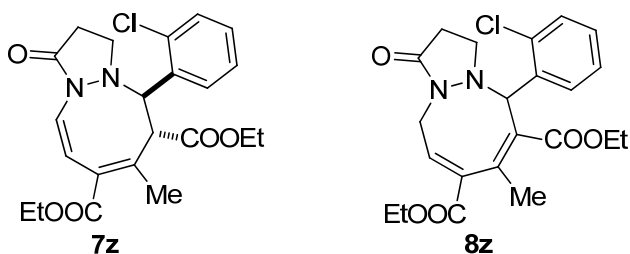

**7z + 8z**: 90% yield; yellow solid. IR (film)  $\nu_{\text{max}}$  2932, 1715, 1541, 1508, 1458, 1396, 1366, 1252, 1199, 1097, 1042, 864, 748, 668  $\text{cm}^{-1}$ ; HRMS (ESI) calcd for  $\text{C}_{22}\text{H}_{26}\text{ClN}_2\text{O}_5^+$   $[\text{M} + \text{H}]^+$  433.1525, found 433.1534.

**8z** (major isomer):  $^1\text{H}$  NMR (300 MHz,  $\text{CDCl}_3$ )  $\delta$  7.73 (dd,  $J = 7.7, 1.5$  Hz, 1H), 7.47–7.31 (m, 1H), 7.27–7.09 (m, 2H), 6.61 (dd,  $J = 6.7, 4.9$  Hz, 1H), 5.57 (s, 1H), 4.46 (dd,  $J = 16.0, 4.9$  Hz, 1H), 4.28 (qd,  $J = 7.1, 4.9$  Hz, 2H), 4.16 (dd,  $J = 16.1, 6.6$  Hz, 1H), 4.07–3.81 (m, 2H), 3.63 (td,  $J = 11.9, 8.0$  Hz, 1H), 3.30–3.18 (m, 1H), 3.09 (ddd,  $J = 16.3, 12.1, 8.4$  Hz, 1H), 2.25 (ddd,  $J = 16.3, 7.9, 1.6$  Hz, 1H), 2.04 (s, 3H), 1.33 (t,  $J = 7.1$  Hz, 3H), 1.19–1.09 (m, 3H);  $^{13}\text{C}$  NMR (75 MHz,  $\text{CDCl}_3$ )  $\delta$  173.6, 168.1, 164.2, 142.8, 138.6, 138.1, 133.2, 132.9, 130.5, 130.2, 129.4, 128.2, 126.1, 69.1, 61.1, 60.9, 53.4, 43.2, 30.6, 22.0, 14.2, 13.9.

**7z** (minor isomer):  $^1\text{H}$  NMR (300 MHz,  $\text{CDCl}_3$ )  $\delta$  6.99 (s, 1H), 5.01 (s, 1H), 2.02 (s, 3H), 1.32 (t,  $J = 7.1$  Hz, 3H), 1.00 (t,  $J = 7.1$  Hz, 3H);  $^{13}\text{C}$  NMR (75 MHz,  $\text{CDCl}_3$ )  $\delta$  167.6, 165.1, 129.8, 128.8, 126.4, 61.2, 60.6, 30.9, 14.1, 13.7.

(7*E*,9*Z*)-Diethyl 5-(2-Fluorophenyl)-7-methyl-1-oxo-2,3,5,6-tetrahydro-1*H*-pyrazolo[1,2-*a*][1,2]diazocine-6,8-dicarboxylate (**7zz**); (6*E*,8*E*)-Diethyl 5-(2-Fluorophenyl)-7-methyl-1-oxo-2,3,5,10-tetrahydro-1*H*-pyrazolo[1,2-*a*][1,2]diazocine-6,8-dicarboxylate (**8zz**)

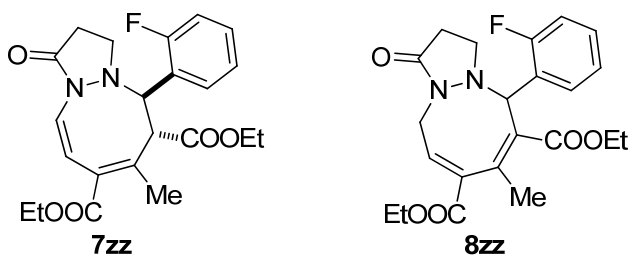

**7zz** + **8zz**: 88% yield; yellow solid. IR (film)  $\nu_{\max}$  2932, 1715, 1699, 1652, 1541, 1484, 1455, 1366, 1241, 1198, 1097, 1041, 864, 812, 761, 650  $\text{cm}^{-1}$ ; HRMS (ESI) calcd for  $\text{C}_{22}\text{H}_{26}\text{FN}_2\text{O}_5^+$   $[\text{M} + \text{H}]^+$  417.1820, found 417.1817.

**8zz** (major isomer):  $^1\text{H}$  NMR (300 MHz,  $\text{CDCl}_3$ )  $\delta$  7.63 (td,  $J = 7.7, 0.9$  Hz, 1H), 7.21–7.09 (m, 1H), 7.04 (tt,  $J = 7.9, 4.0$  Hz, 1H), 6.91 (ddd,  $J = 10.5, 8.1, 1.2$  Hz, 1H), 6.58 (dd,  $J = 6.5, 5.0$  Hz, 1H), 5.56 (s, 1H), 4.45 (dd,  $J = 16.1, 4.9$  Hz, 1H), 4.29 (dd,  $J = 14.1, 7.1$  Hz, 2H), 4.18–3.83 (m, 3H), 3.64 (td,  $J = 11.9, 8.0$  Hz, 1H), 3.31–3.18 (m, 1H), 2.99 (ddd,  $J = 16.4, 12.1, 8.4$  Hz, 1H), 2.26 (ddd,  $J = 16.4, 8.0, 2.0$  Hz, 1H), 2.07 (s, 3H), 1.34 (t,  $J = 7.1$  Hz, 3H), 1.14 (t,  $J = 7.1$  Hz, 3H);  $^{13}\text{C}$  NMR (75 MHz,  $\text{CDCl}_3$ )  $\delta$  173.4, 167.9, 164.2, 159.7, 143.6, 138.1, 133.2, 130.2, 129.0, 128.5, 127.8, 123.4, 115.1, 65.5, 61.2, 60.8, 53.5, 43.1, 30.5, 22.1, 14.1, 13.9.

**7zz** (minor isomer):  $^1\text{H}$  NMR (300 MHz,  $\text{CDCl}_3$ )  $\delta$  7.38 (t,  $J = 7.4$  Hz, 1H), 7.33–7.22 (m, 1H), 5.24–4.97 (s, 1H), 2.04 (s, 3H), 1.32 (t,  $J = 7.1$  Hz, 3H), 1.03 (t,  $J = 7.1$  Hz, 3H);  $^{13}\text{C}$  NMR (75 MHz,  $\text{CDCl}_3$ )  $\delta$  167.6, 165.2, 160.3, 123.8, 115.5, 61.3, 60.6, 30.9, 14.1, 13.7.

## Mechanism of the [3 + 2 + 3] Annulation: An Alternative Route toward the Tetrahydrodiazocine **8**

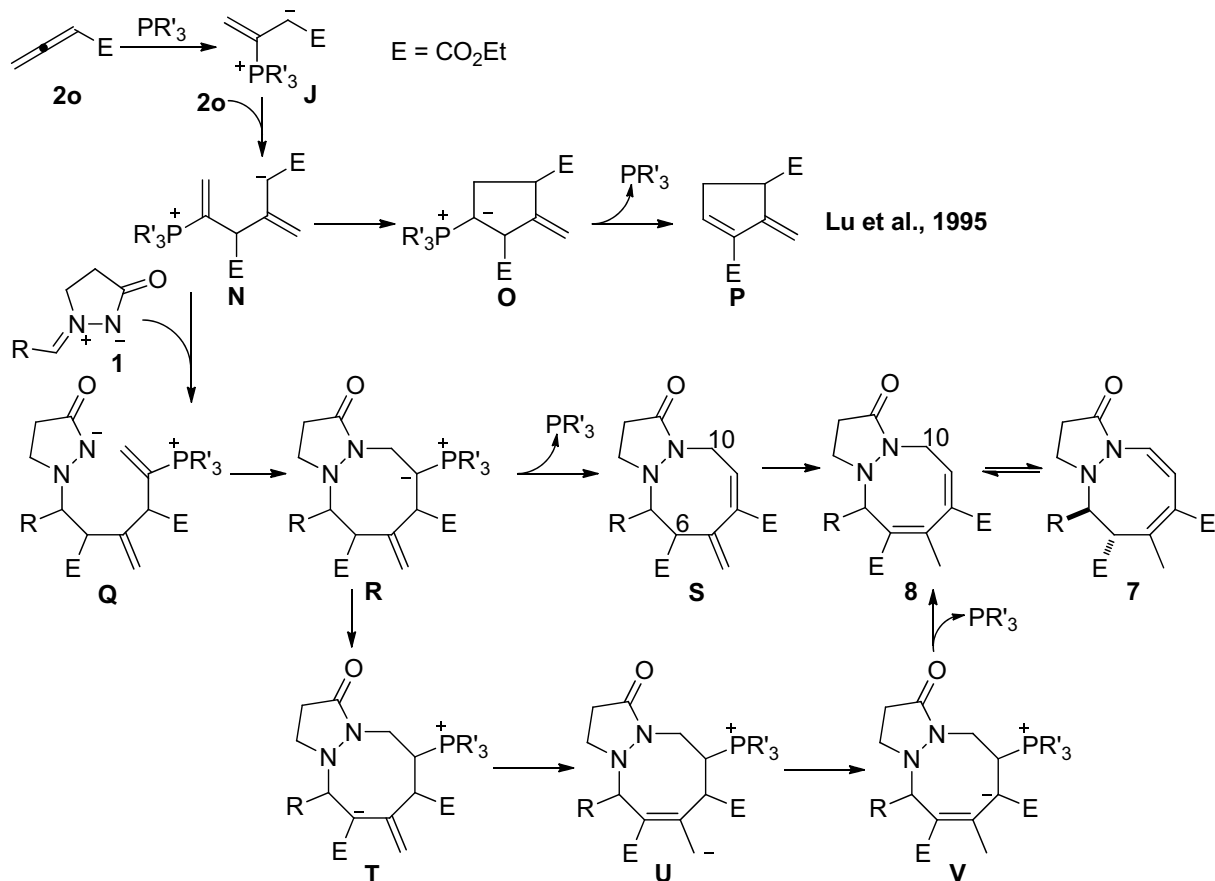

## Transformations of the Fused Pyrazolidinone Heterocycles from Phosphine-catalyzed Annulations of Azomethine Imines with Allenates

### 1. Samarium Iodide-Mediated Reduction of the C=C Bond of the Cycloadduct **7b** and **3ba**

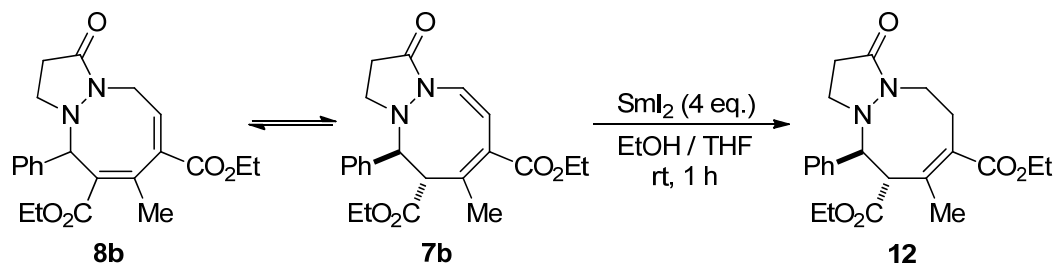

To a stirred solution of the mixture of **8b** and **7b** (79.6 mg, 0.20 mmol) in EtOH (1 mL) was added THF solution of SmI<sub>2</sub> (0.1M, 8.0 mL, 0.80 mmol) at room temperature. After stirring for 1



hour at room temperature, the reaction solution was poured into saturated aq.  $\text{NaHCO}_3$  and extracted with ethyl acetate. The organic extracts were combined and washed with brine, dried over  $\text{Na}_2\text{SO}_4$  and evaporated in vacuo. The residue was purified by flash column chromatography (eluting with EtOAc/Hexane = 1 : 1) to give **12** as a colorless semi-solid, 58.8 mg, 73% yield. IR (neat)  $\nu_{\text{max}}$  2892, 2359, 1735, 1701, 1635, 1494, 1454, 1367, 1327, 1281, 1251, 1233, 1217, 1196, 1177, 1111, 1074, 1043, 1032, 914, 857, 833, 782, 758, 754, 735, 718, 703,  $680\text{ cm}^{-1}$ ;  $^1\text{H NMR}$  (300 MHz,  $\text{CDCl}_3$ )  $\delta$  7.47 – 7.28 (m, 5H), 4.45 – 4.11 (m, 5H), 3.89 (q,  $J = 7.1\text{ Hz}$ , 2H), 3.53 – 3.40 (m, 1H), 3.20 (dd,  $J = 11.9, 8.3\text{ Hz}$ , 1H), 3.05 (s, 1H), 2.90 – 2.68 (m, 2H), 2.06 (s, 3H), 1.54 (s, 1H), 1.31 (t,  $J = 7.1\text{ Hz}$ , 3H), 0.98 (t,  $J = 7.1\text{ Hz}$ , 3H), 0.92 – 0.81 (m, 1H);  $^{13}\text{C NMR}$  (75 MHz,  $\text{CDCl}_3$ )  $\delta$  182.03, 170.13, 168.51, 143.07, 137.25, 130.24, 129.28, 128.76, 128.62, 70.76, 60.89, 60.59, 53.55, 51.20, 48.75, 30.66, 29.98, 16.63, 14.25, 13.82; HRMS (ESI) calcd for  $\text{C}_{22}\text{H}_{29}\text{N}_2\text{O}_5^+$   $[\text{M} + \text{H}]^+$  401.2071, found 401.2071.

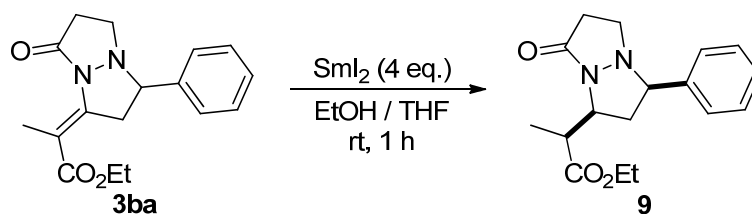

A colorless semi-solid, 68% yield. IR (film)  $\nu_{\text{max}}$  3062, 3032, 2981, 2943, 2903, 2843, 1732, 1604, 1496, 1455, 1421, 1370, 1341, 1272, 1201, 1095, 1068, 1029, 974, 911, 860, 830, 757,  $702\text{ cm}^{-1}$ ;  $^1\text{H NMR}$  (300 MHz,  $\text{CDCl}_3$ )  $\delta$  7.32 – 7.18 (m, 5H), 4.36 – 4.27 (m, 1H), 4.05 (q,  $J = 7.1\text{ Hz}$ , 2H), 3.47 – 3.29 (m, 2H), 2.98 – 2.76 (m, 2H), 2.65 – 2.52 (m, 3H), 2.01 (m,  $J = 12.7, 10.8, 7.5\text{ Hz}$ , 1H), 1.16 (m,  $J = 10.1, 4.1\text{ Hz}$ , 6H);  $^{13}\text{C NMR}$  (75 MHz,  $\text{CDCl}_3$ )  $\delta$  173.13, 172.76, 137.70, 128.46, 127.92, 127.11, 69.72, 60.36, 54.87, 46.11, 42.76, 40.56, 31.65, 13.90, 11.65; HRMS (ESI) calcd for  $\text{C}_{17}\text{H}_{23}\text{N}_2\text{O}_3^+$   $[\text{M} + \text{H}]^+$  303.1703, found 303.1696.

## 2. Reduction of the Cycloadduct by Sodium Borohydride

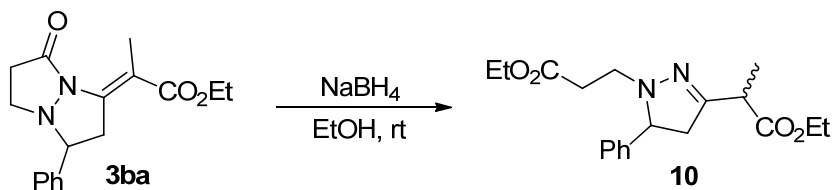

To a stirred solution of **3ba** (30.0 mg, 0.10 mmol) in EtOH (2 mL) was added  $\text{NaBH}_4$  (7.6 mg, 0.2 mmol) at room temperature. After stirring at room temperature overnight, the reaction

solution was concentrated under vacuum and the residue was purified by flash column (eluting with EtOAc/Hexane = 1 : 3) to give **10** as a colorless semi-solid, 20.9 mg, 63% yield. The product is the mixture of diastereomers, which couldn't be separated by flash column chromatography. The spectra were recorded by using this mixture. IR (neat)  $\nu_{\max}$  2984, 1731, 1495, 1456, 1369, 1323, 1250, 1184, 1096, 1029, 943, 861, 758, 732, 720, 714, 701, 683  $\text{cm}^{-1}$ ;  $^1\text{H}$  NMR (300 MHz,  $\text{CDCl}_3$ )  $\delta$  7.43 – 7.26 (m, 10H), 4.25 – 4.02 (m, 10H), 3.51 (dq,  $J$  = 14.4, 7.2 Hz, 2H), 3.20 – 2.92 (m, 6H), 2.80 – 2.55 (m, 6H), 1.40 (dd,  $J$  = 16.8, 7.2 Hz, 6H), 1.27 (td,  $J$  = 7.1, 2.8 Hz, 6H), 1.20 (t,  $J$  = 7.1 Hz, 6H);  $^{13}\text{C}$  NMR (75 MHz,  $\text{CDCl}_3$ )  $\delta$  172.64, 172.61, 172.34, 151.92, 140.40, 128.54, 127.72, 127.47, 127.45, 71.81, 71.69, 60.94, 60.23, 49.67, 49.64, 43.54, 43.49, 41.63, 41.53, 33.18, 15.07, 14.68, 14.13; HRMS (ESI) calcd for  $\text{C}_{19}\text{H}_{26}\text{N}_2\text{O}_4^+$  [ $\text{M}$ ] $^+$  346.1893, found 346.1897.

### 3. Cuprous Bromide-Mediated Oxidation/Bromination of the Cycloadduct

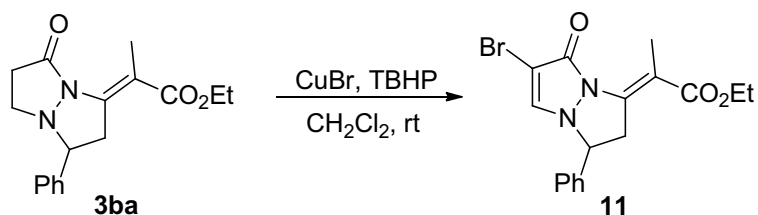

To a mixture of CuBr (14.0 mg, 0.1 mmol) and **3ba** (30.0 mg, 0.1 mmol) in 2 mL of  $\text{CH}_2\text{Cl}_2$  was added tert-butyl hydroperoxide (0.1 mL, 5 – 6 M in decane) under nitrogen over 30 seconds at 0  $^\circ\text{C}$ . The reaction temperature was allowed to warm to room temperature. The reaction mixture was stirred for 4 hours, and then diluted with EtOAc and filtered through a short celite column eluting with EtOAc. The filtrate was concentrated and the residue was purified by flash column chromatography (eluting with hexane/EtOAc = 2 : 1) to give **11** as a pale yellow semi-solid, 21.4 mg, 57% yield. IR (neat)  $\nu_{\max}$  2981, 1701, 1633, 1539, 1457, 1366, 1274, 1137, 1030, 946, 912, 838, 767, 731, 698  $\text{cm}^{-1}$ ;  $^1\text{H}$  NMR (300 MHz,  $\text{CDCl}_3$ )  $\delta$  7.47 – 7.37 (m, 3H), 7.35 – 7.27 (m, 3H), 4.79 (t,  $J$  = 8.1 Hz, 1H), 4.19 (q,  $J$  = 7.1 Hz, 2H), 4.14 – 4.06 (m, 1H), 3.52 (ddd,  $J$  = 17.6, 7.6, 1.9 Hz, 1H), 2.35 (t,  $J$  = 1.8 Hz, 3H), 1.29 (t,  $J$  = 7.1 Hz, 3H);  $^{13}\text{C}$  NMR (75 MHz,  $\text{CDCl}_3$ )  $\delta$  167.80, 157.76, 139.42, 138.60, 136.41, 129.33, 126.74, 111.91, 90.66, 62.07, 60.71, 44.49, 17.11, 14.18; HRMS (EI) calcd for  $\text{C}_{17}\text{H}_{17}\text{BrN}_2\text{O}_3^+$  [ $\text{M}$ ] $^+$  376.0423, found 376.0427.

### Crystallographic Data for 3ad, 3ao, 3an, 4, *trans*-5, 6, 7h, 7i, and 8a

Crystallographic data for 3ad, 3ao, 3an, 4, *trans*-5, 6, 7h, 7i, and 8a have been deposited with the Cambridge Crystallographic Data Centre as supplementary numbers CCDC 804940–804949. These data can be obtained free of charge via [www.ccdc.cam.ac.uk/data\\_request/cif](http://www.ccdc.cam.ac.uk/data_request/cif), or by emailing [data\\_request@ccdc.cam.ac.uk](mailto:data_request@ccdc.cam.ac.uk), or by contacting The Cambridge Crystallographic Data Centre, 12, Union Road, Cambridge CB2 1EZ, UK; fax: +44 1223 336033.

### ORTEP Representations of 3ad, 3an, 3ao, 4, *trans*-5, 6, 7h, 7i, and 8a

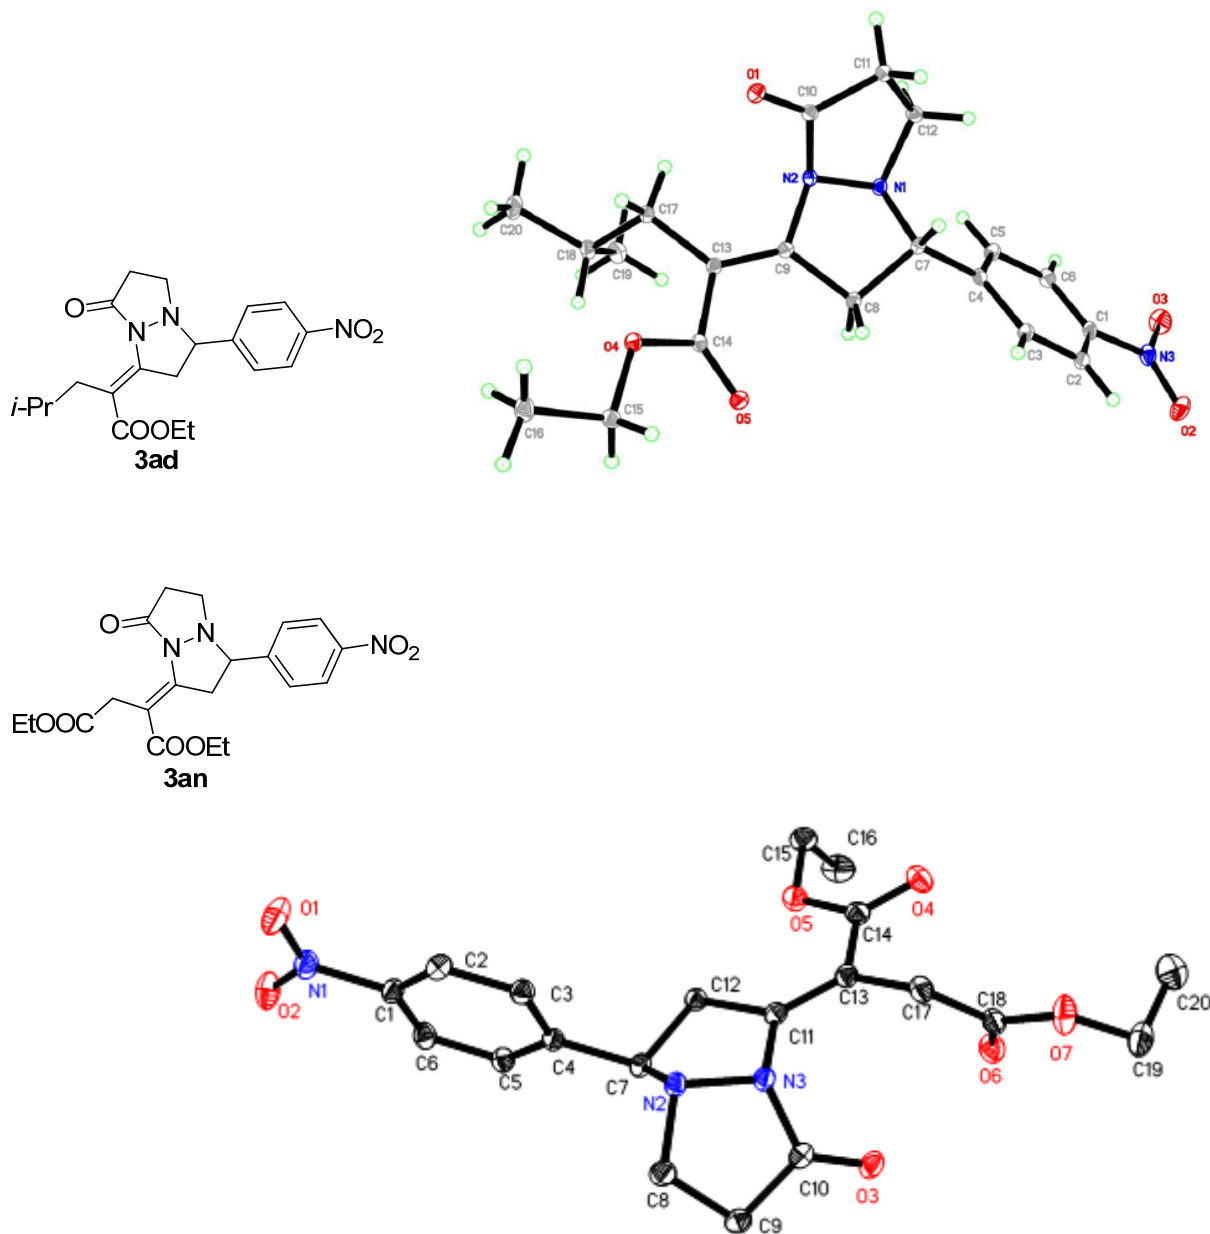

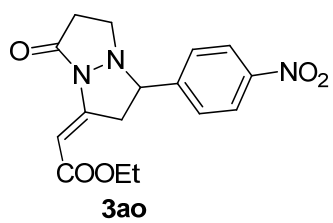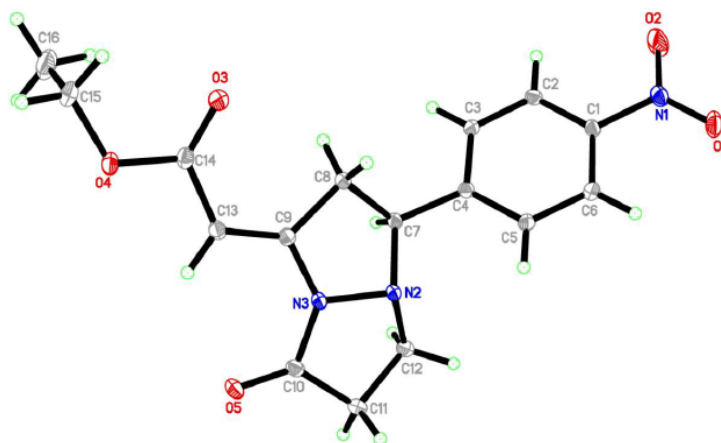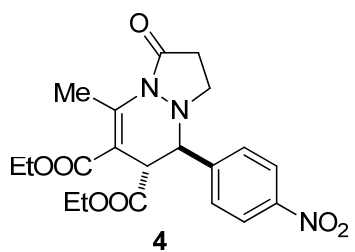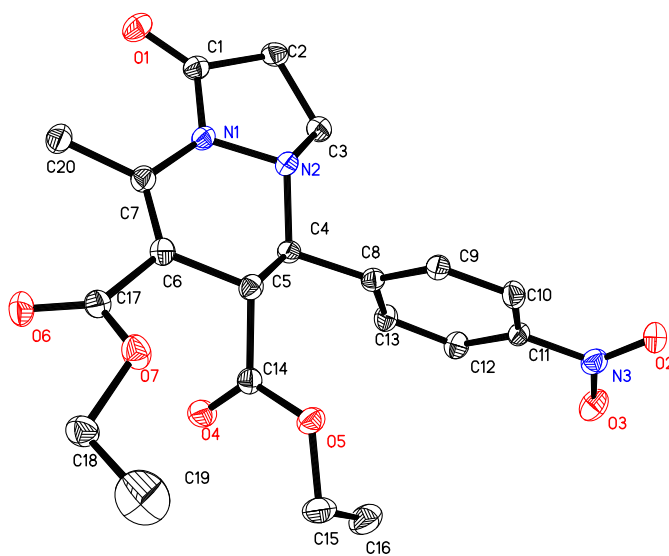

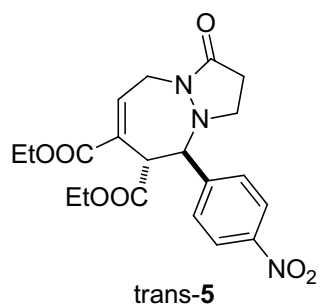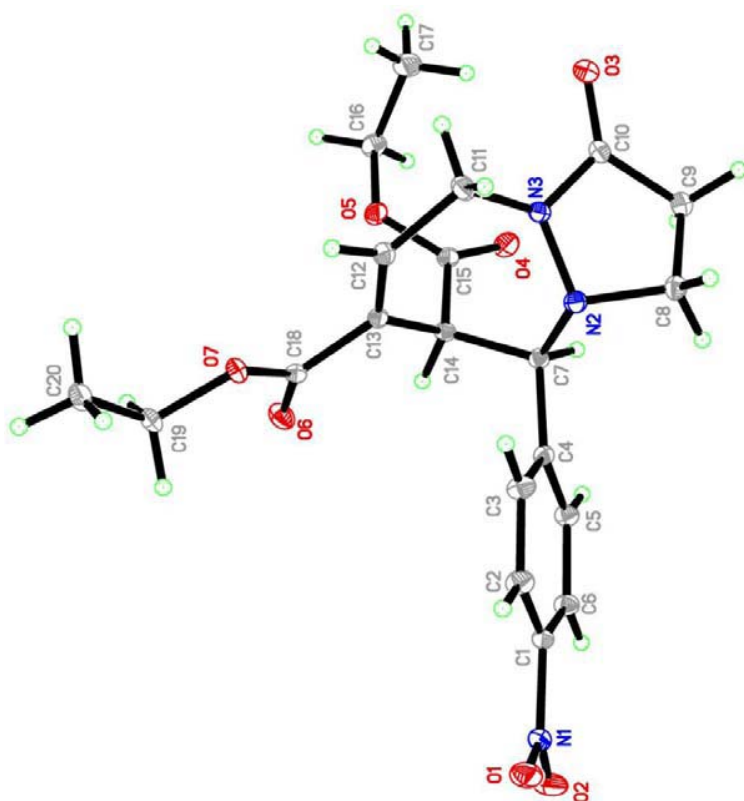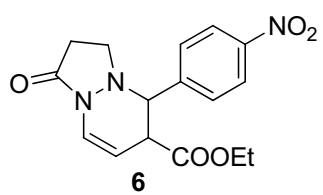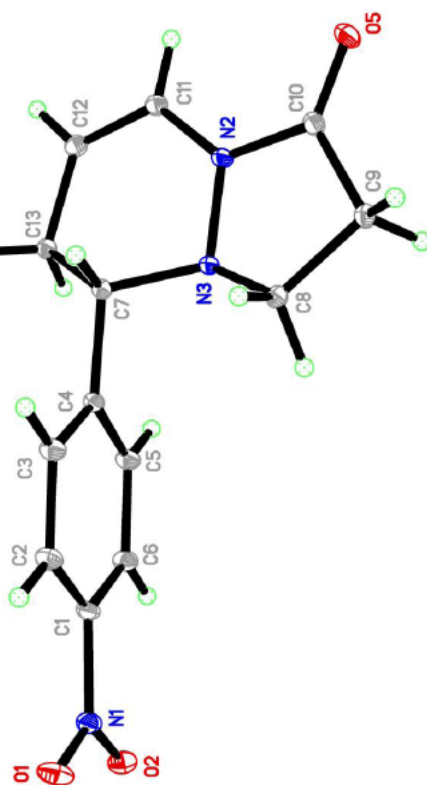

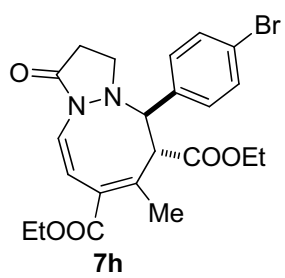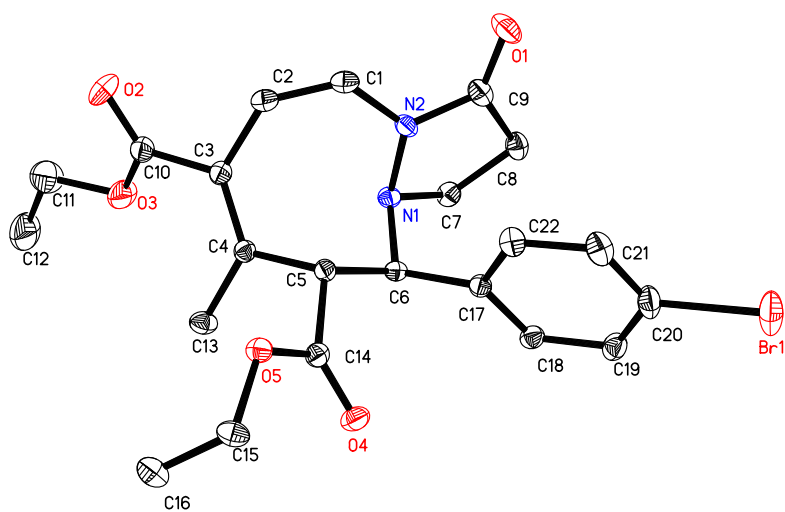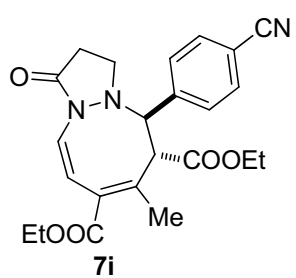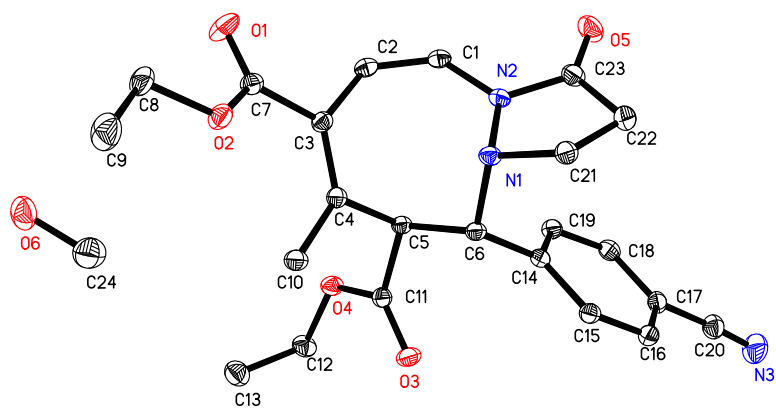

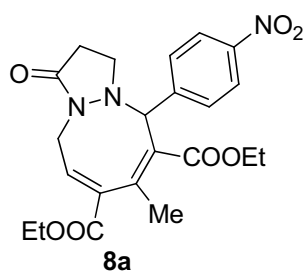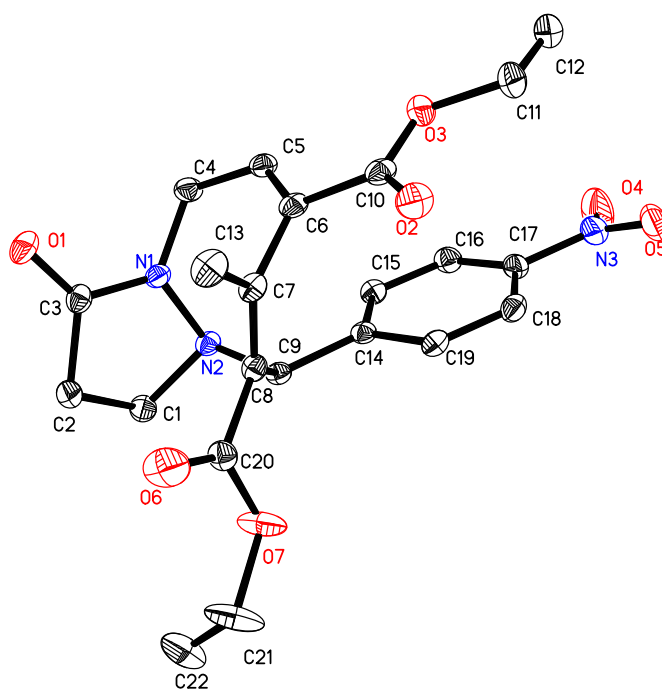

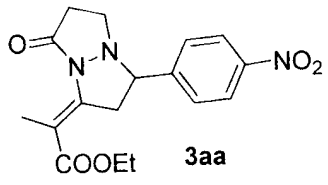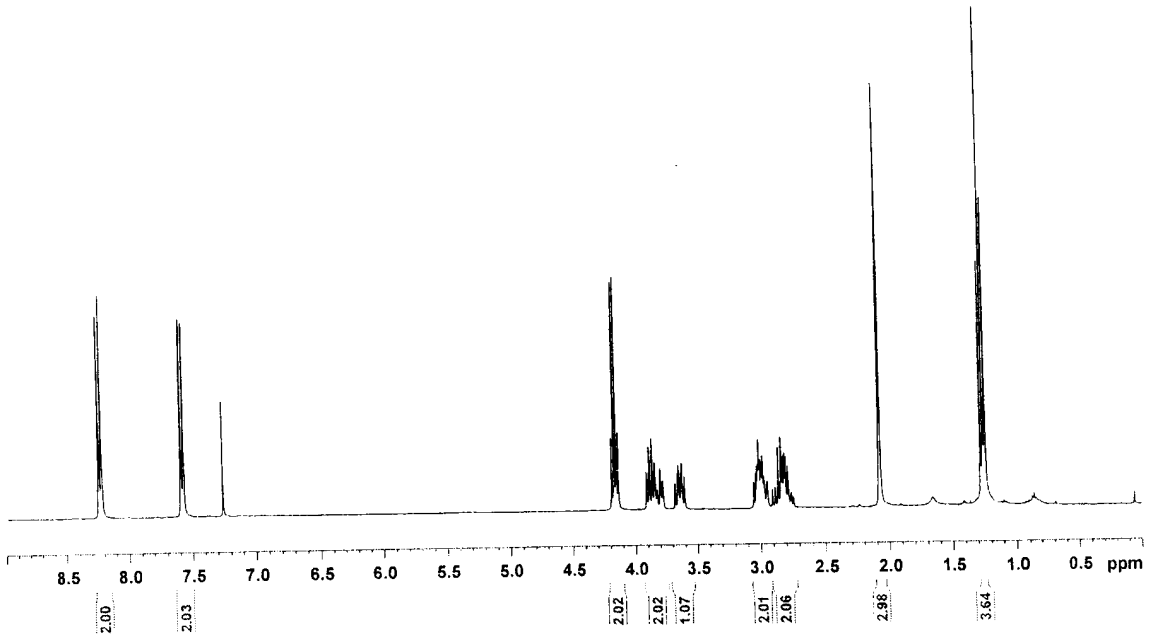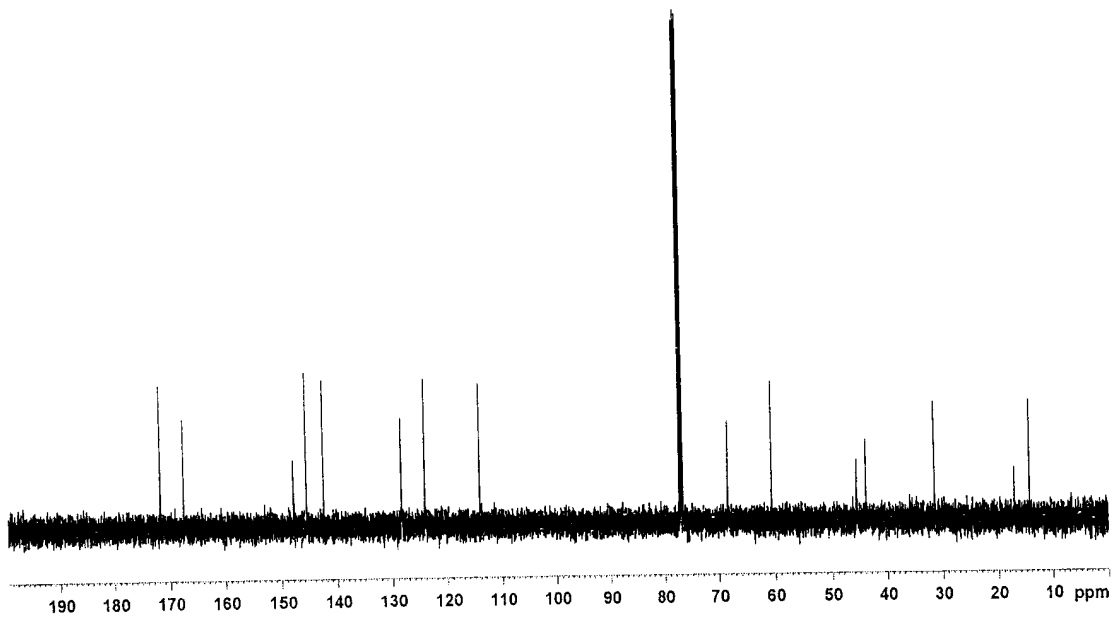



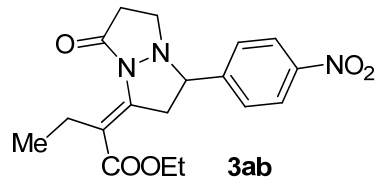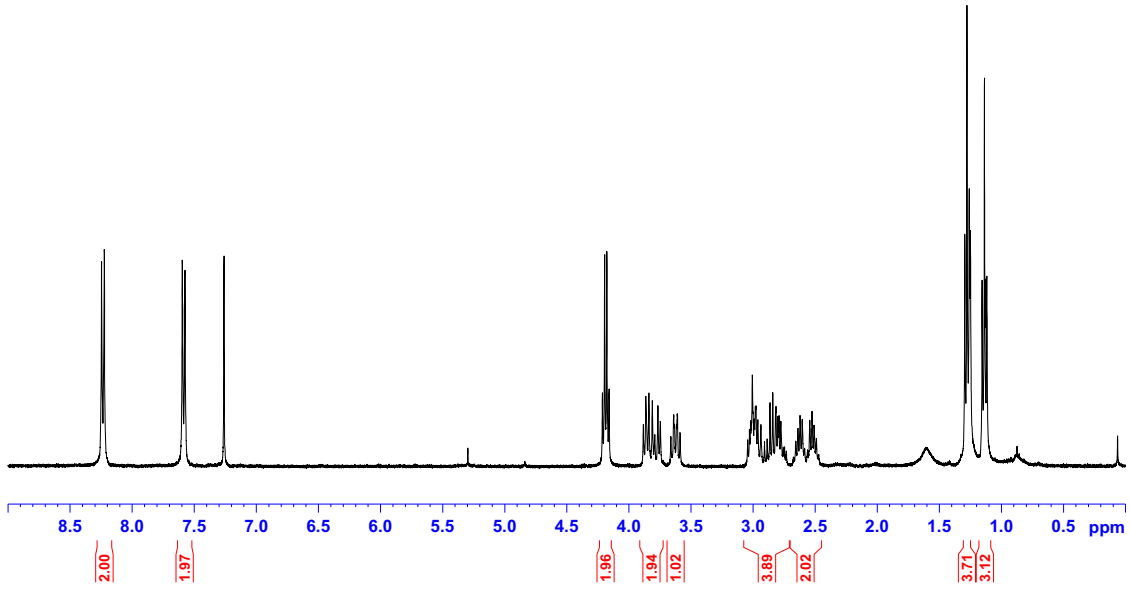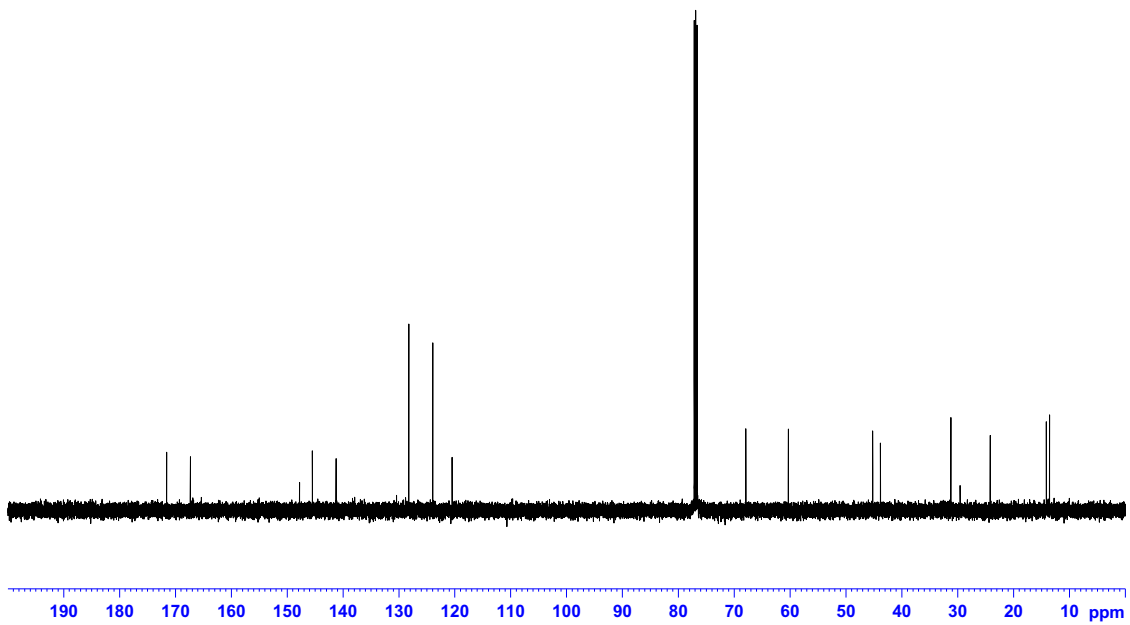

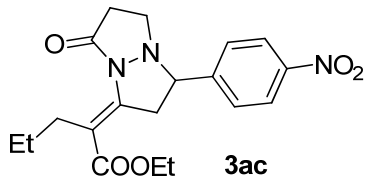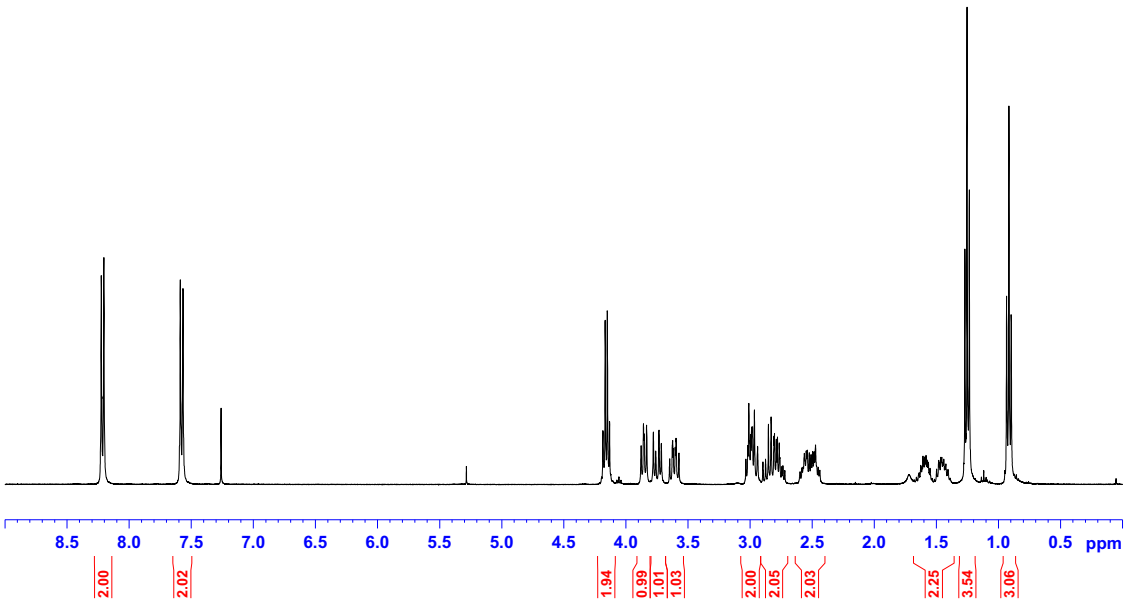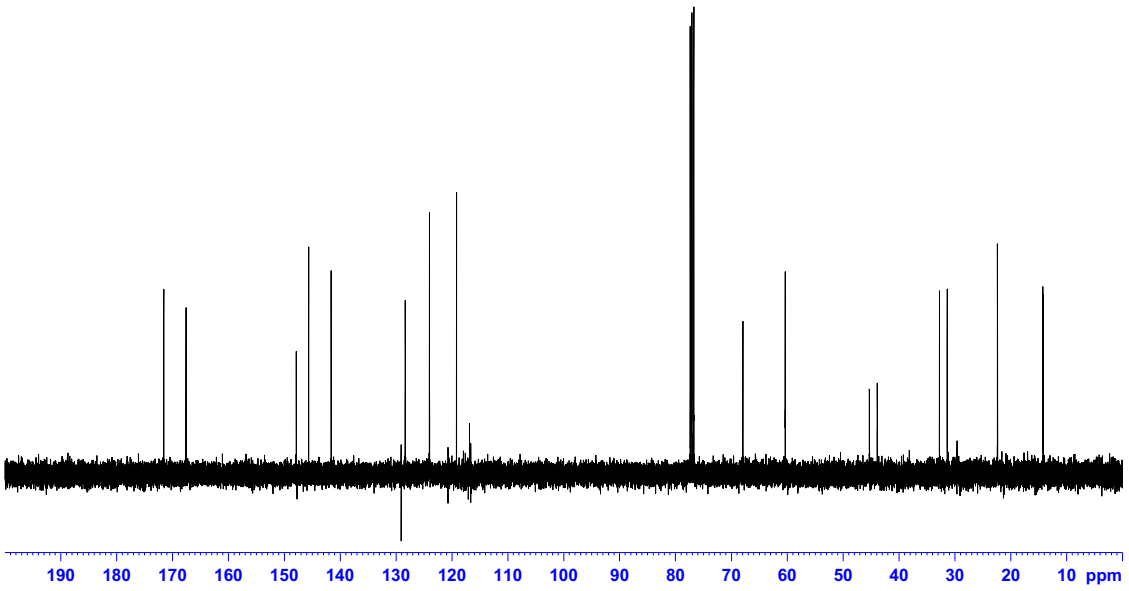

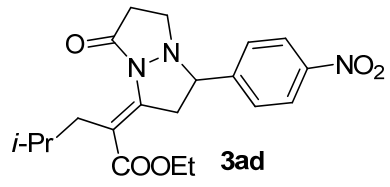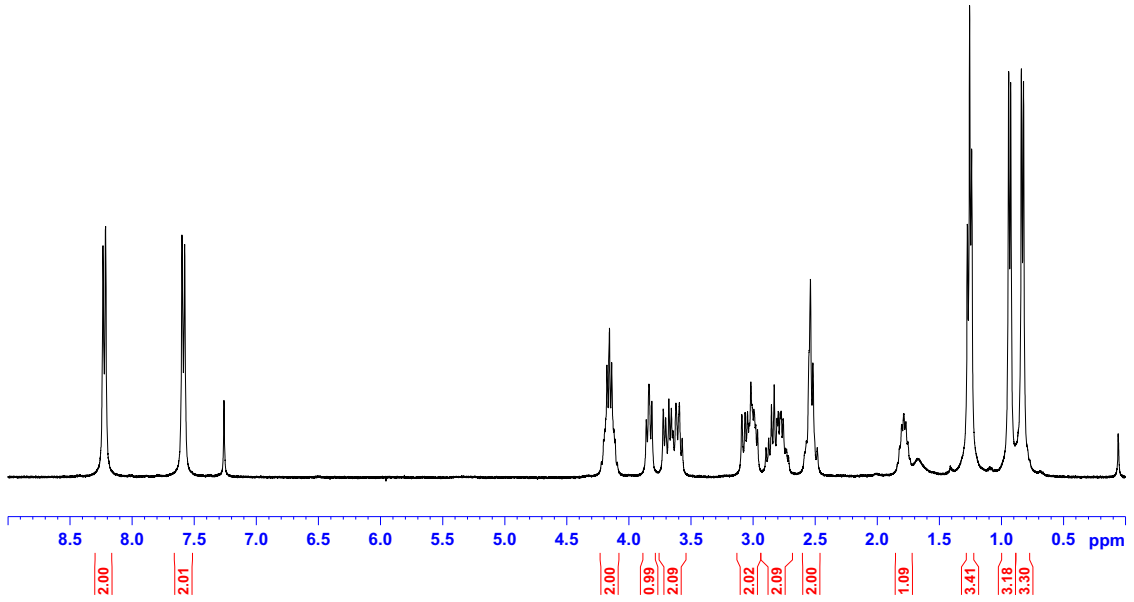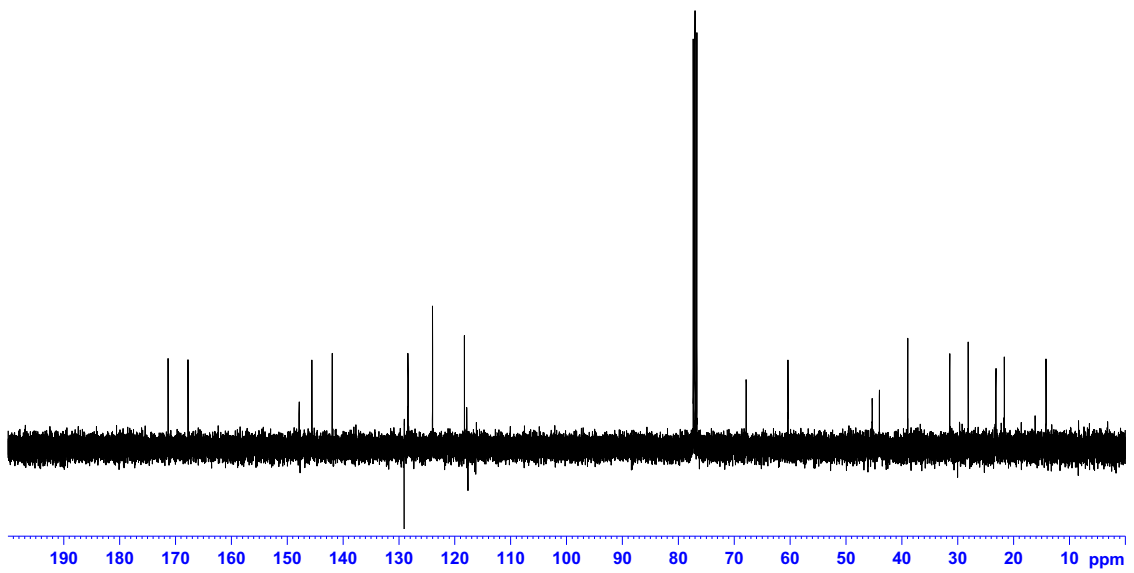

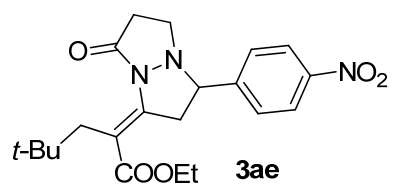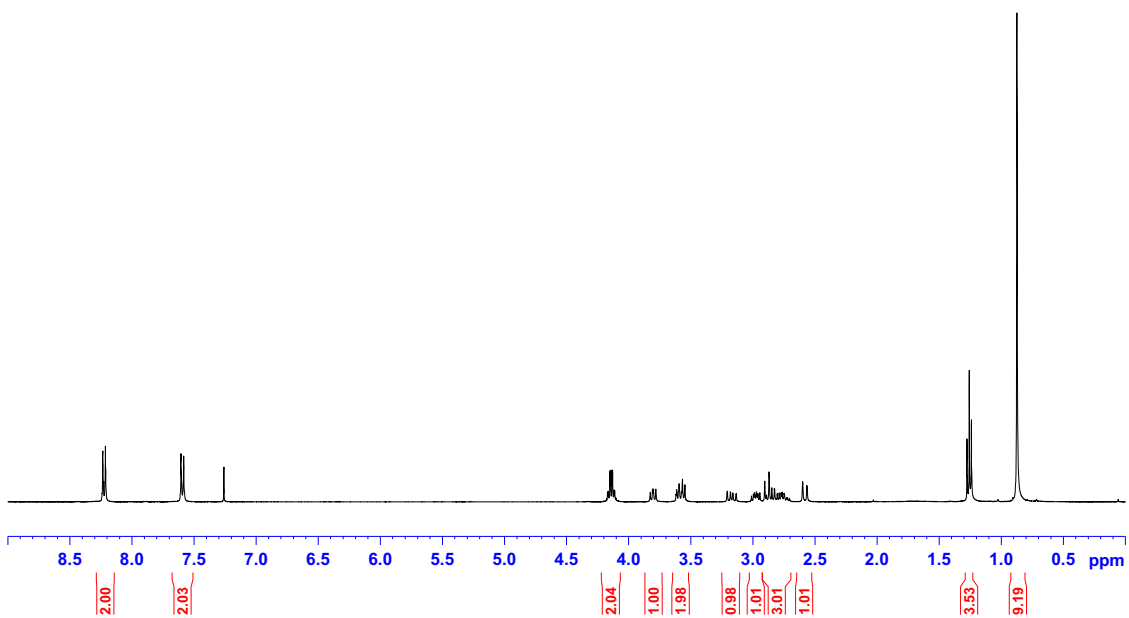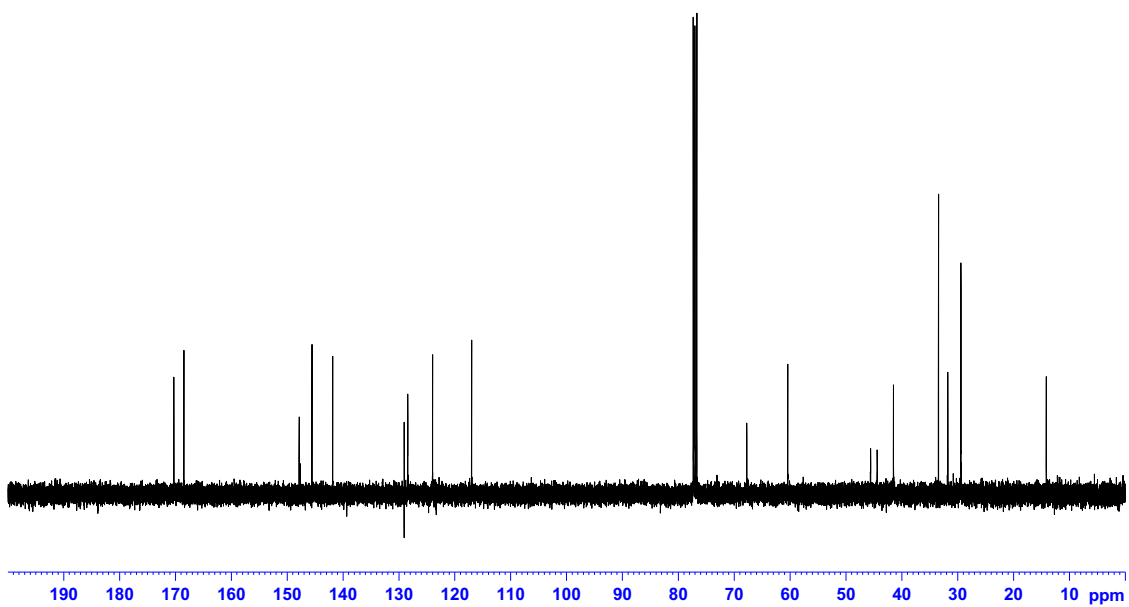

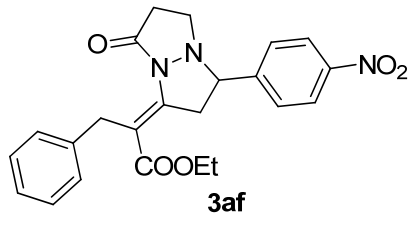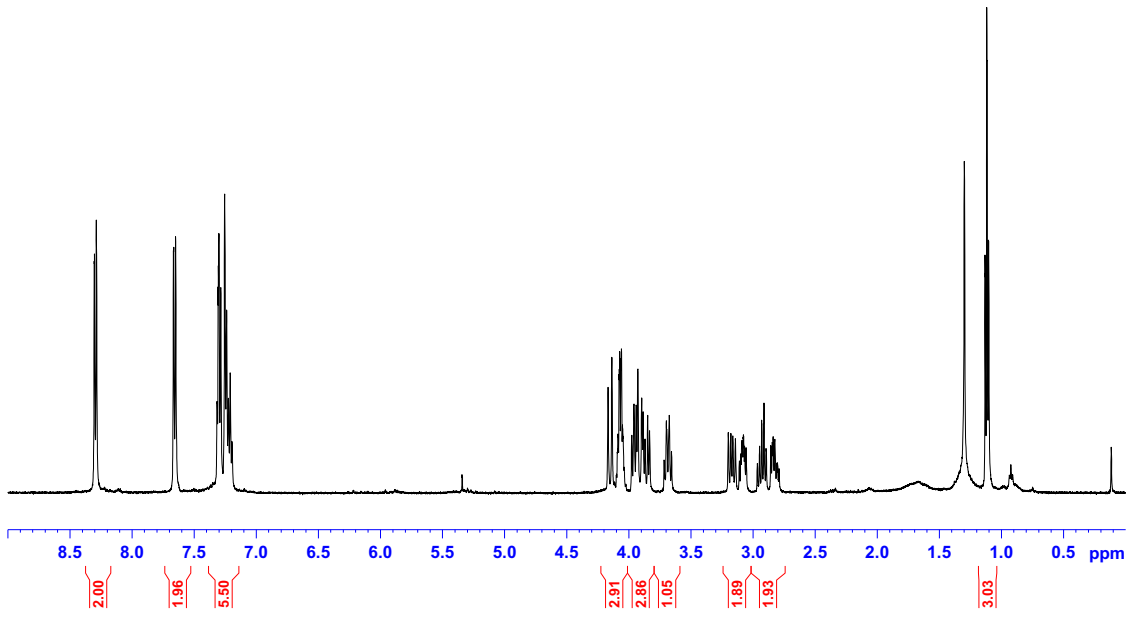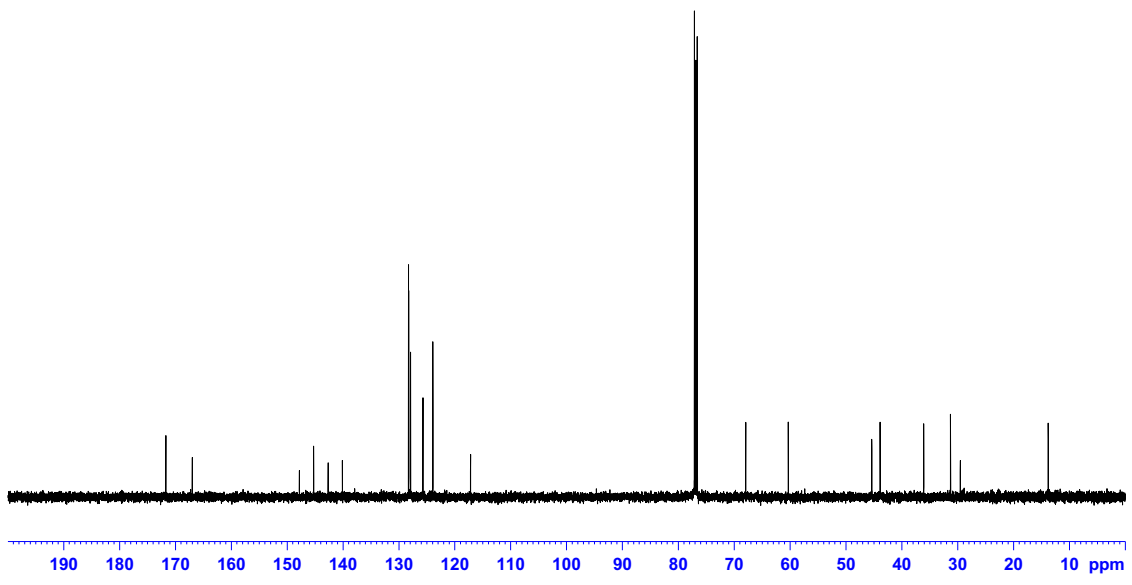

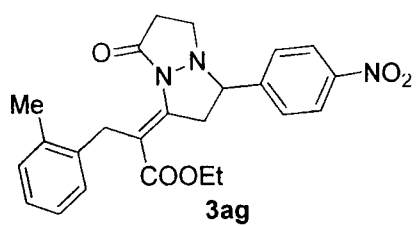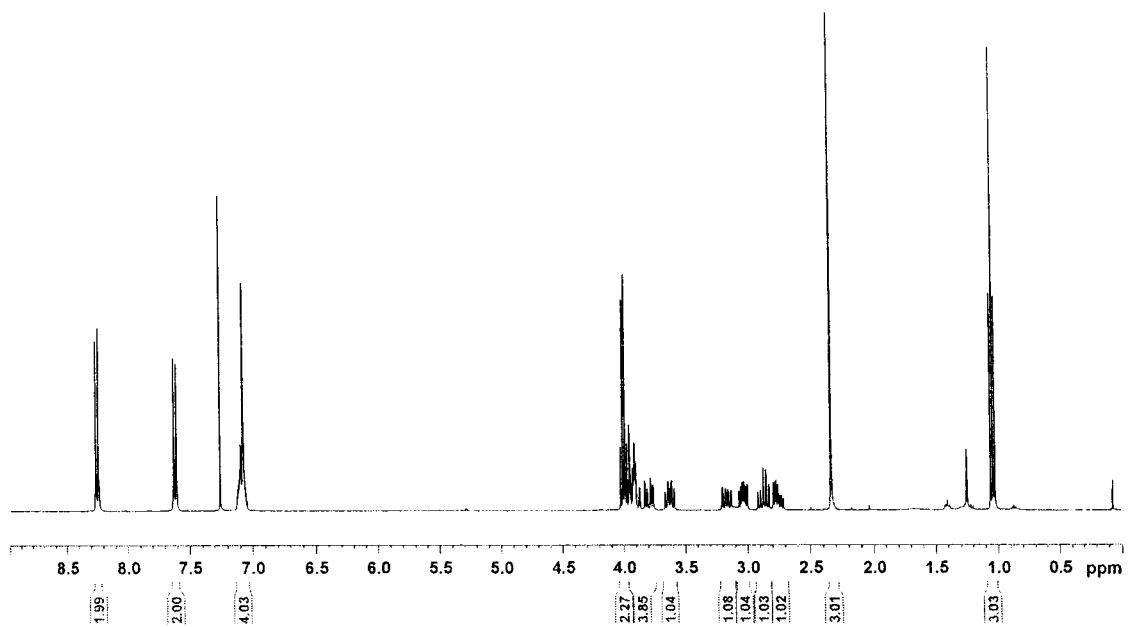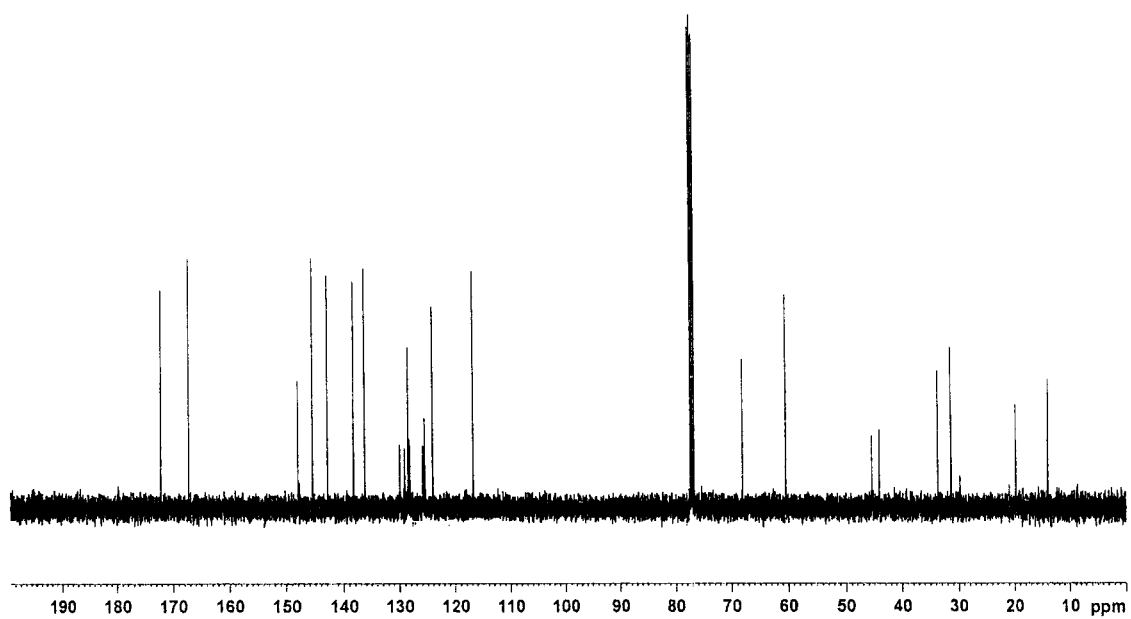

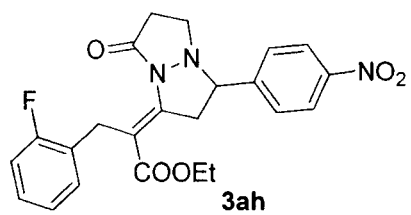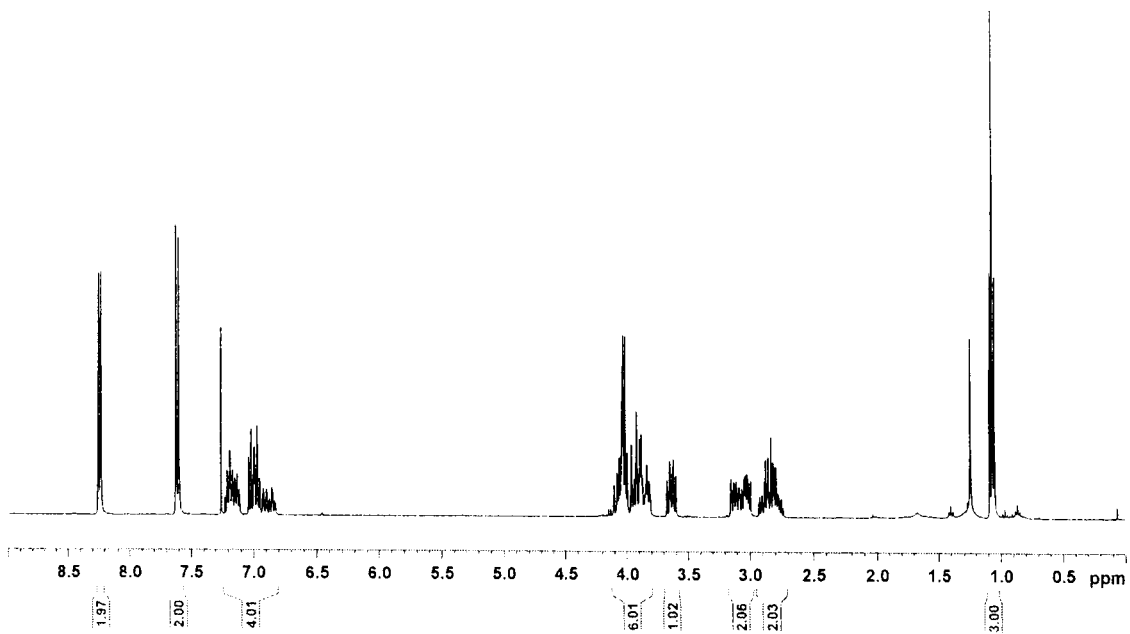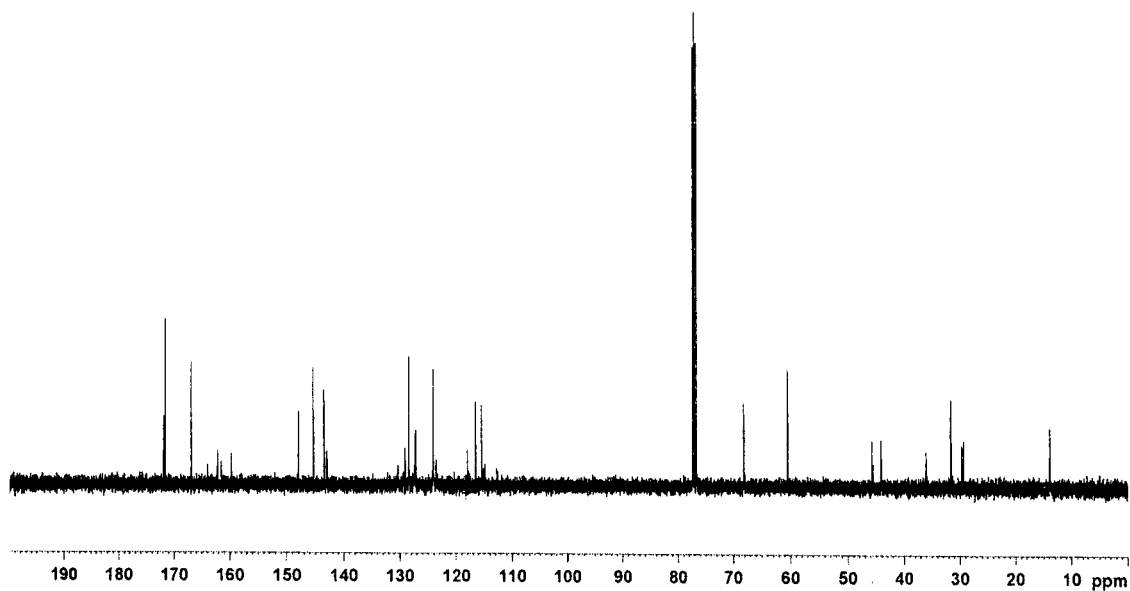

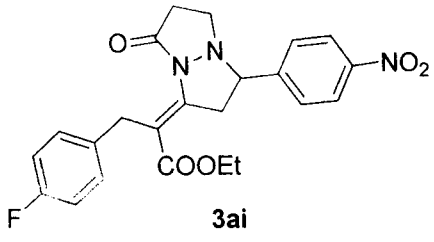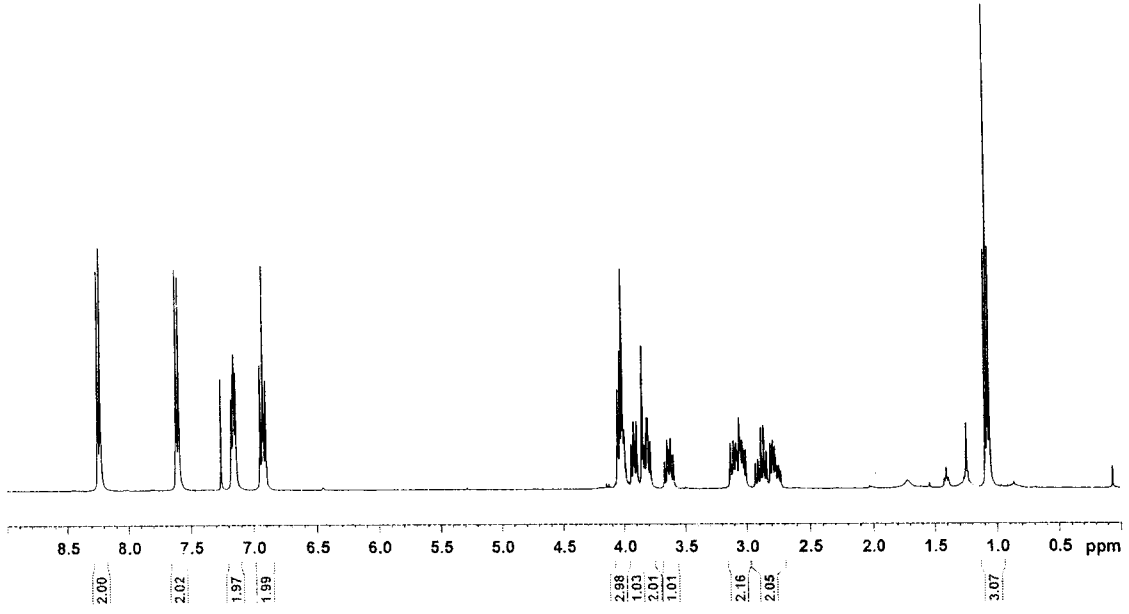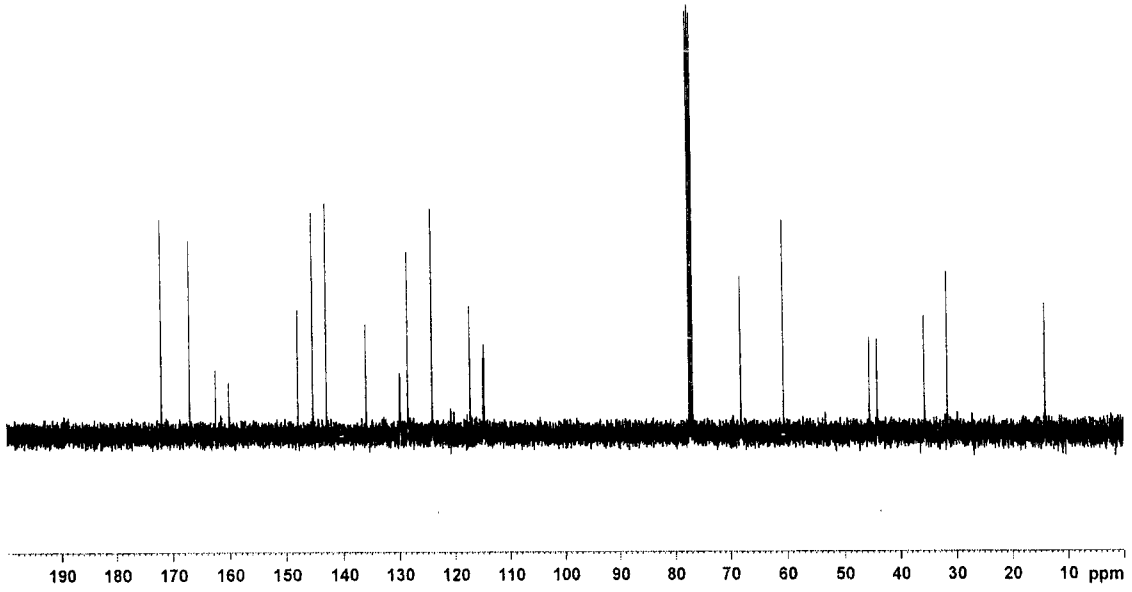



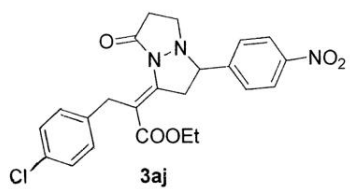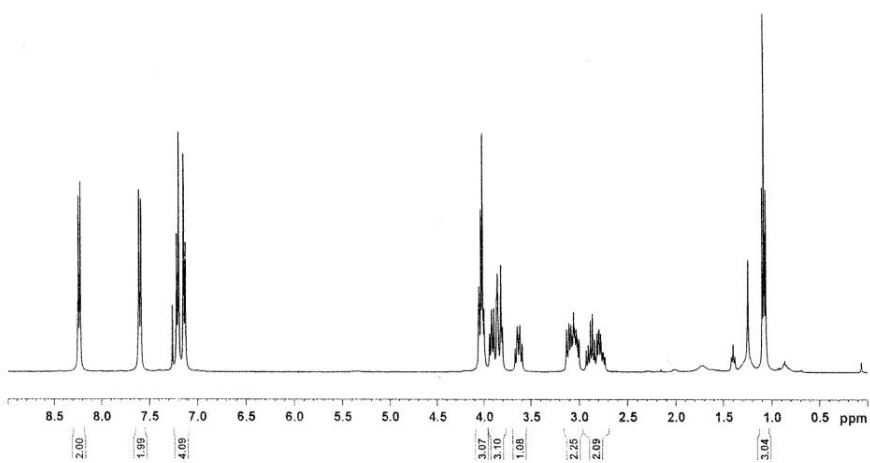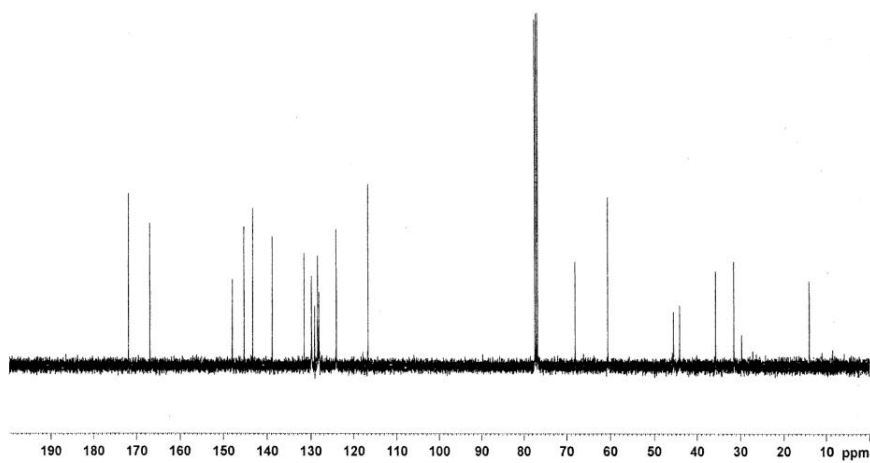

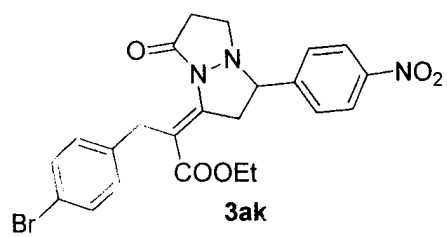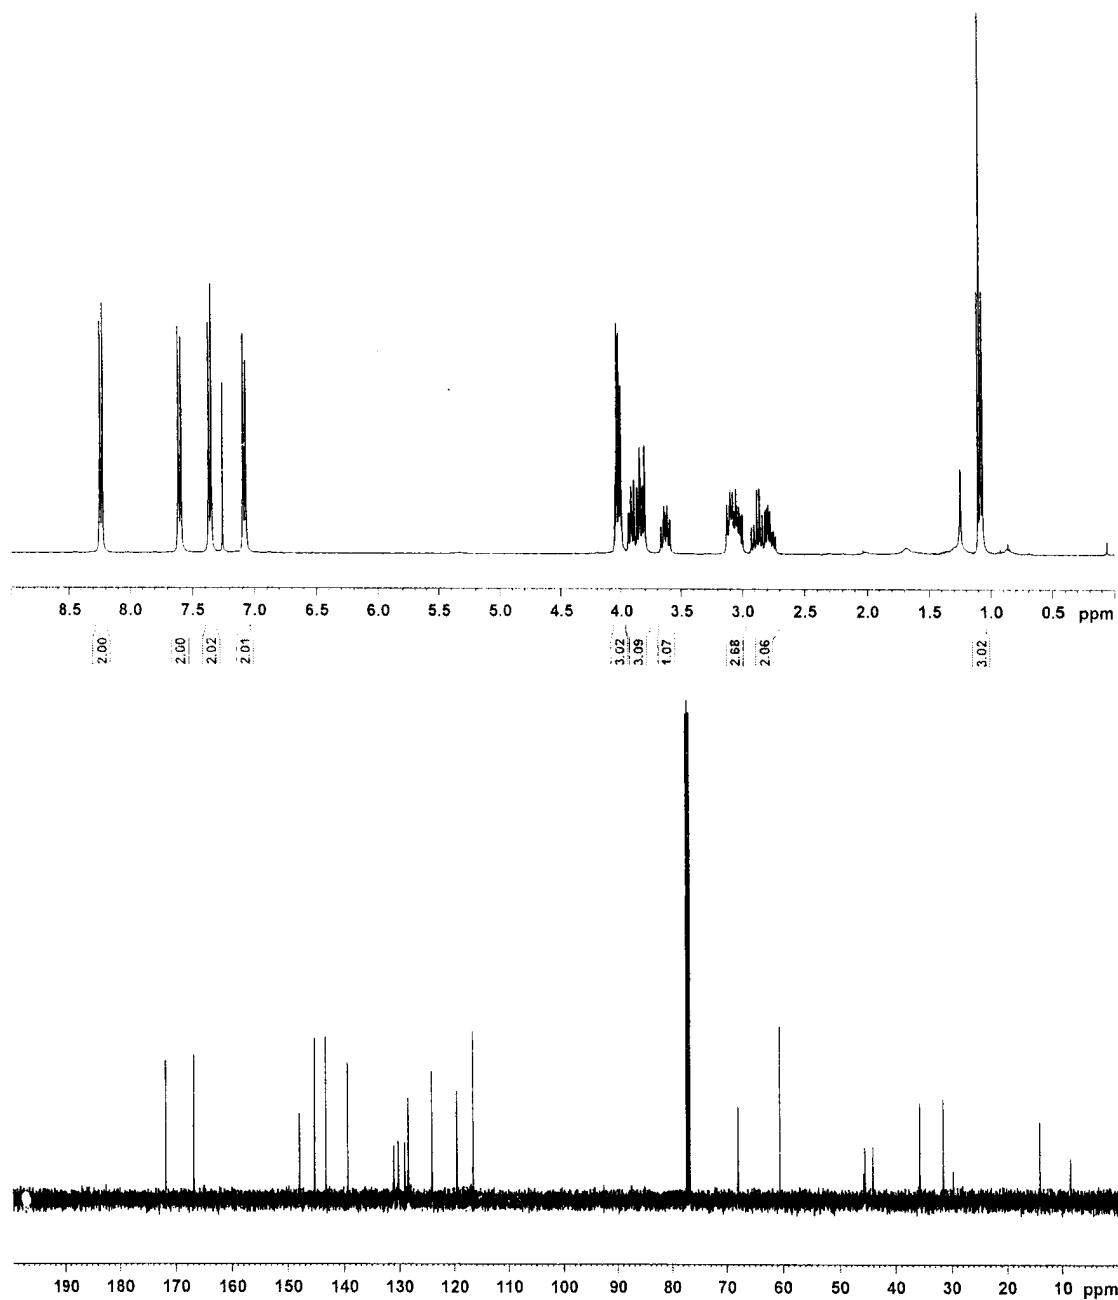

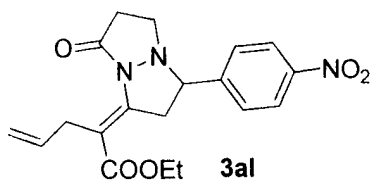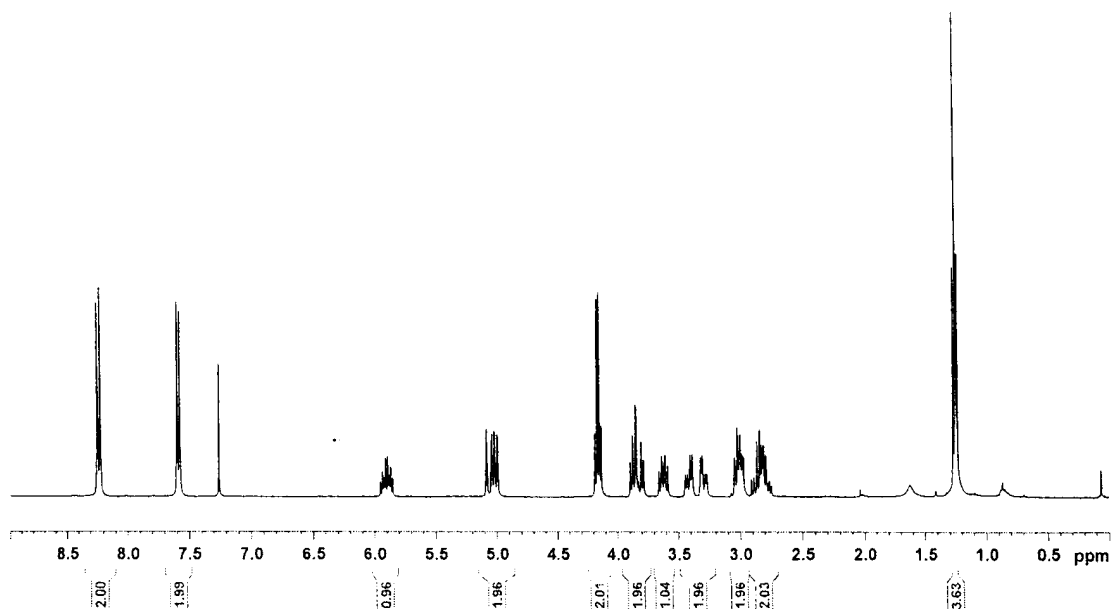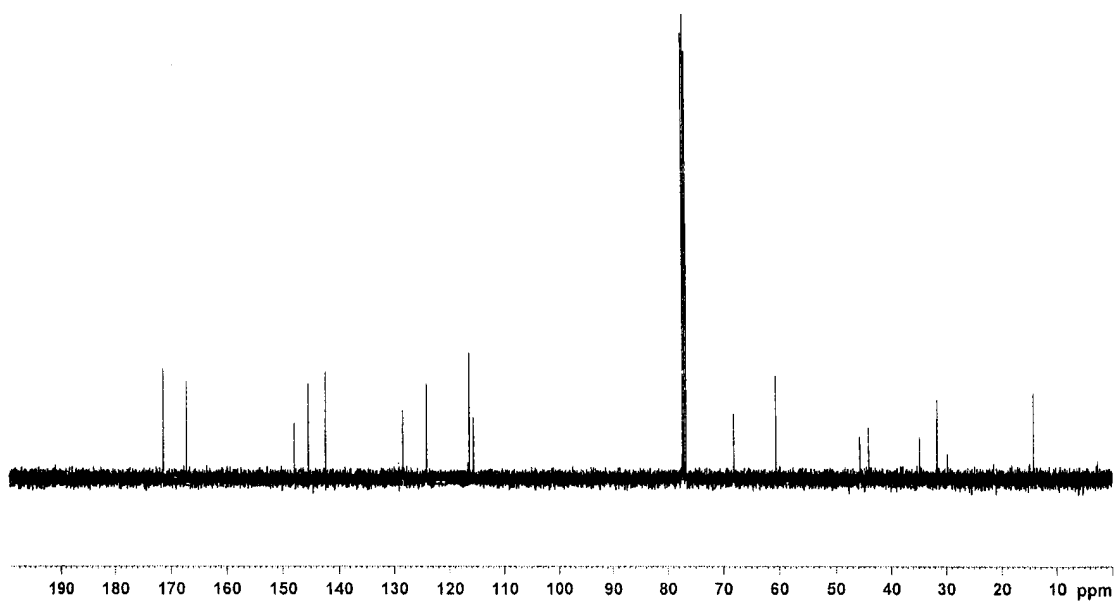

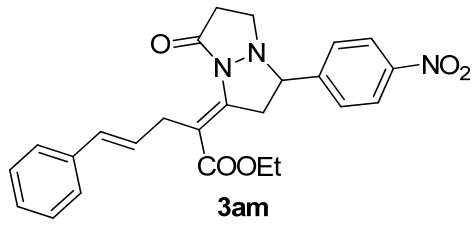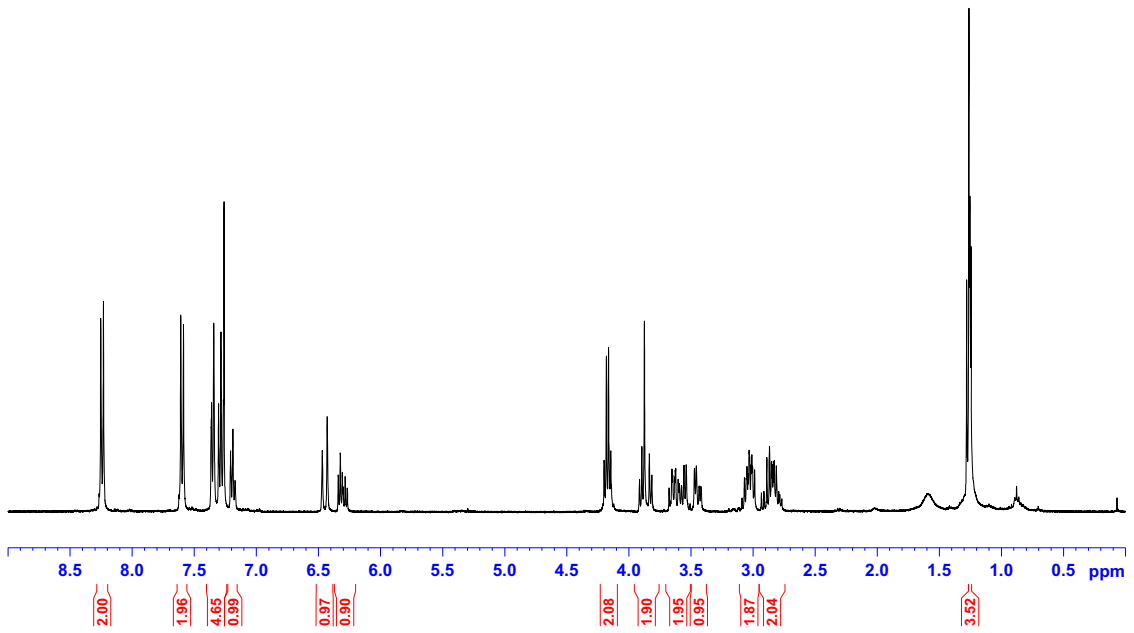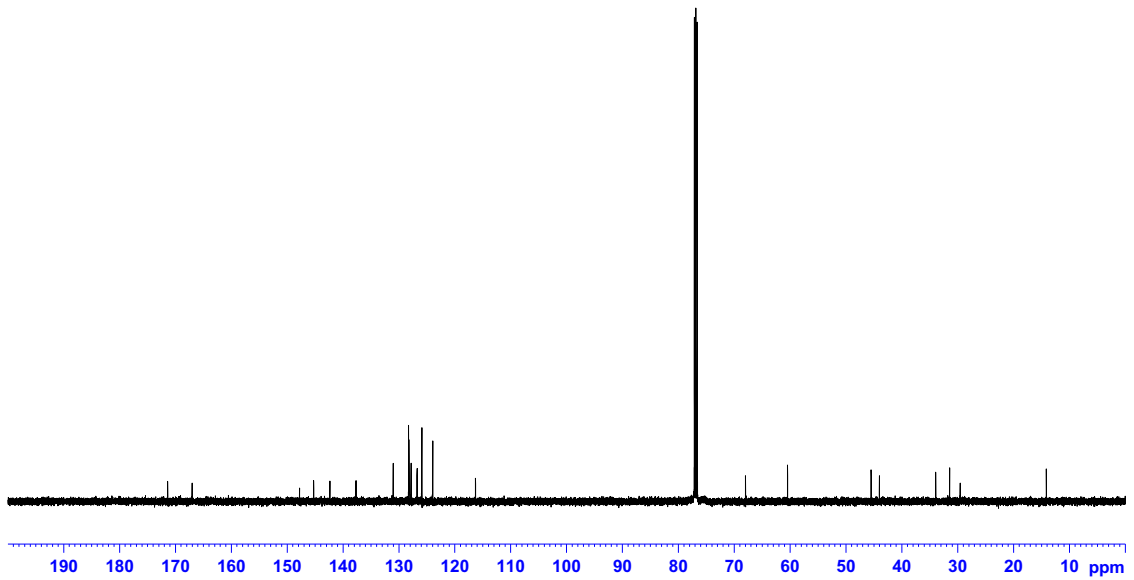

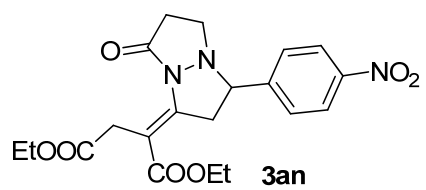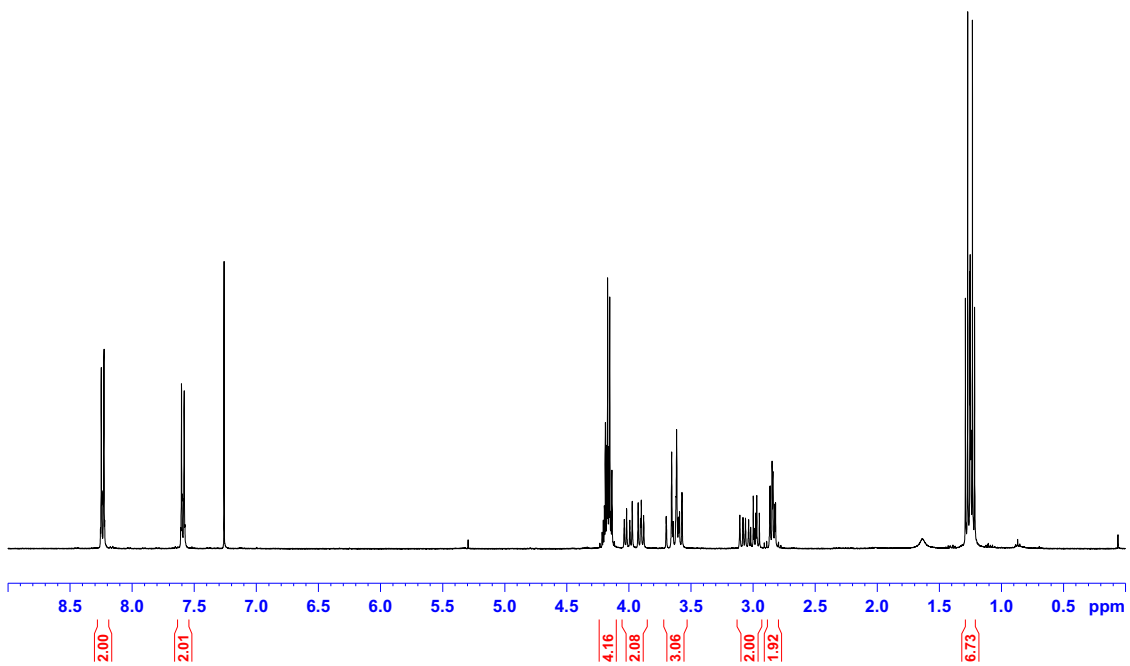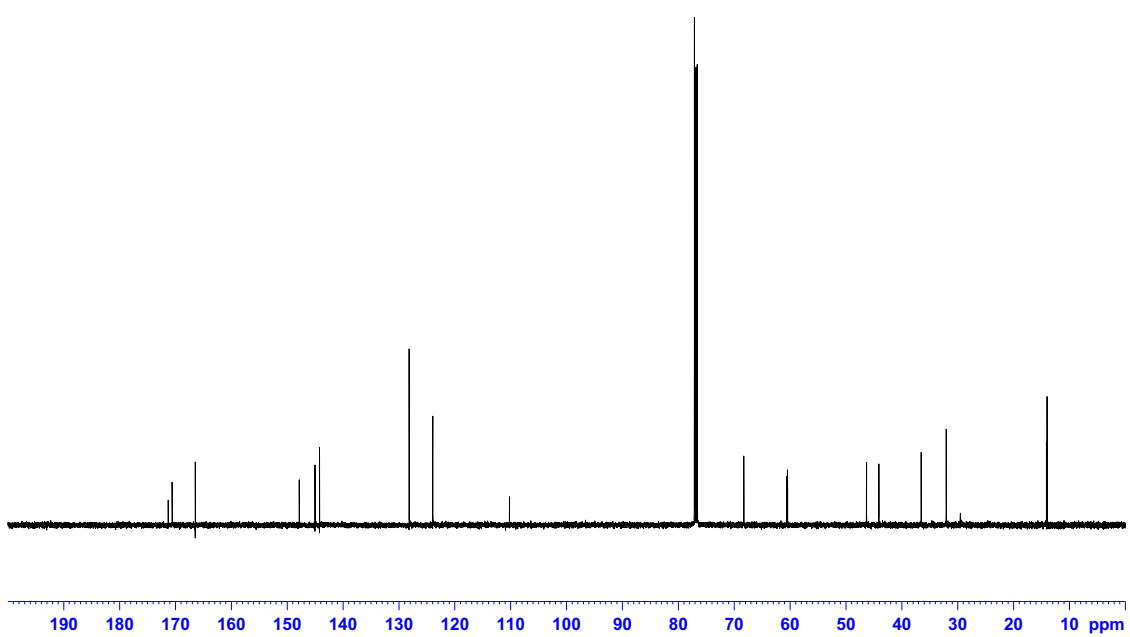

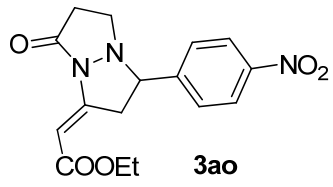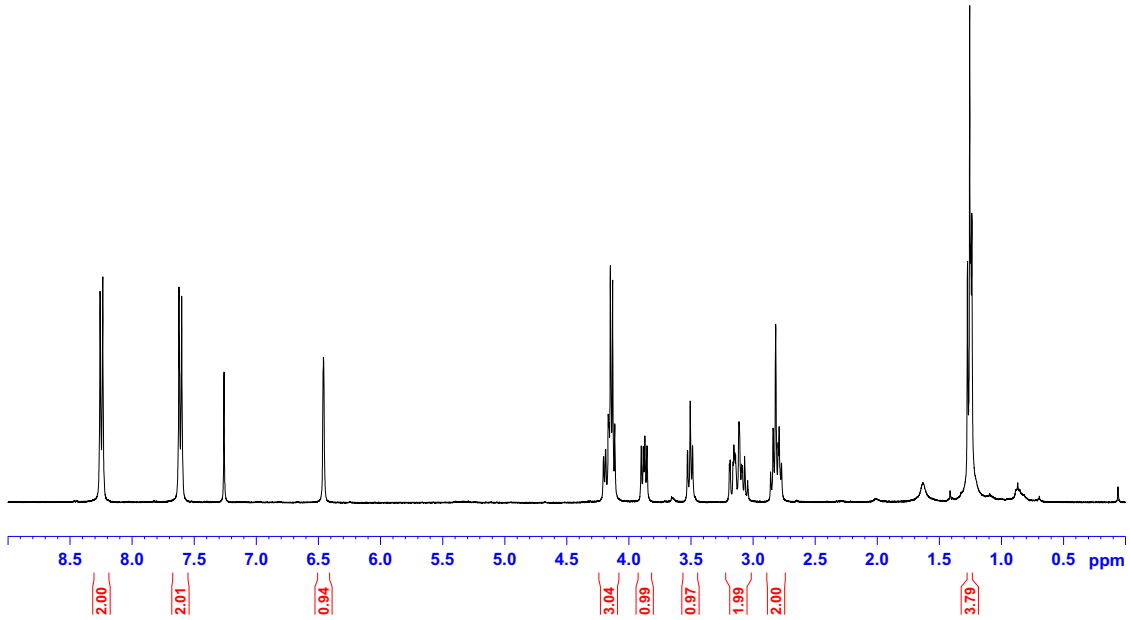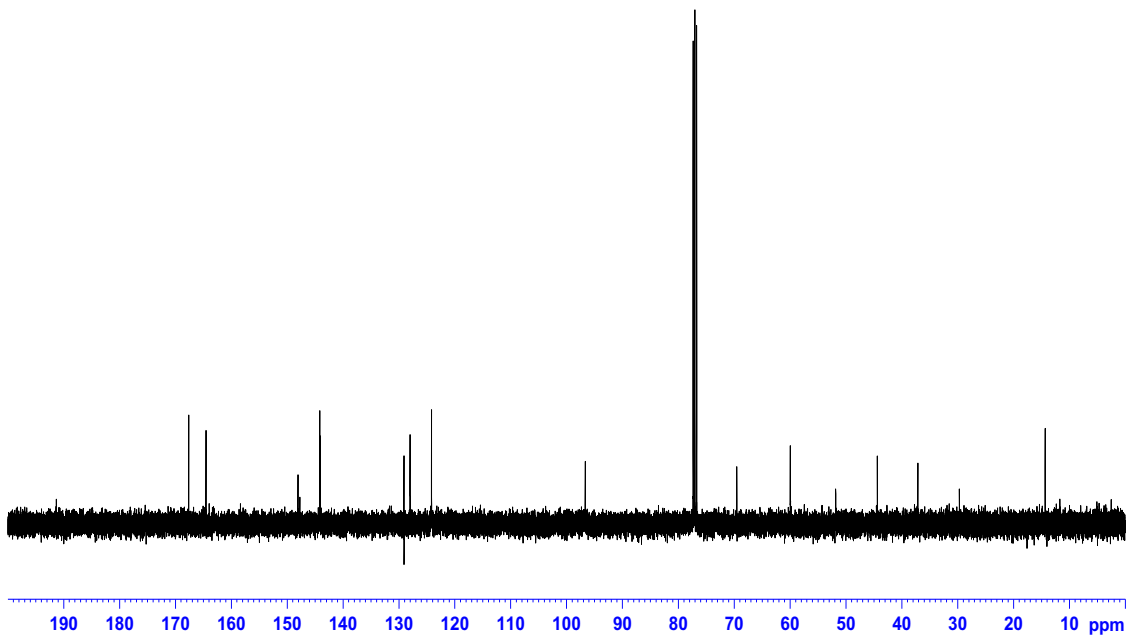

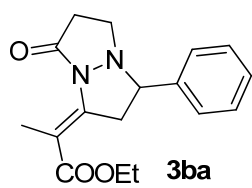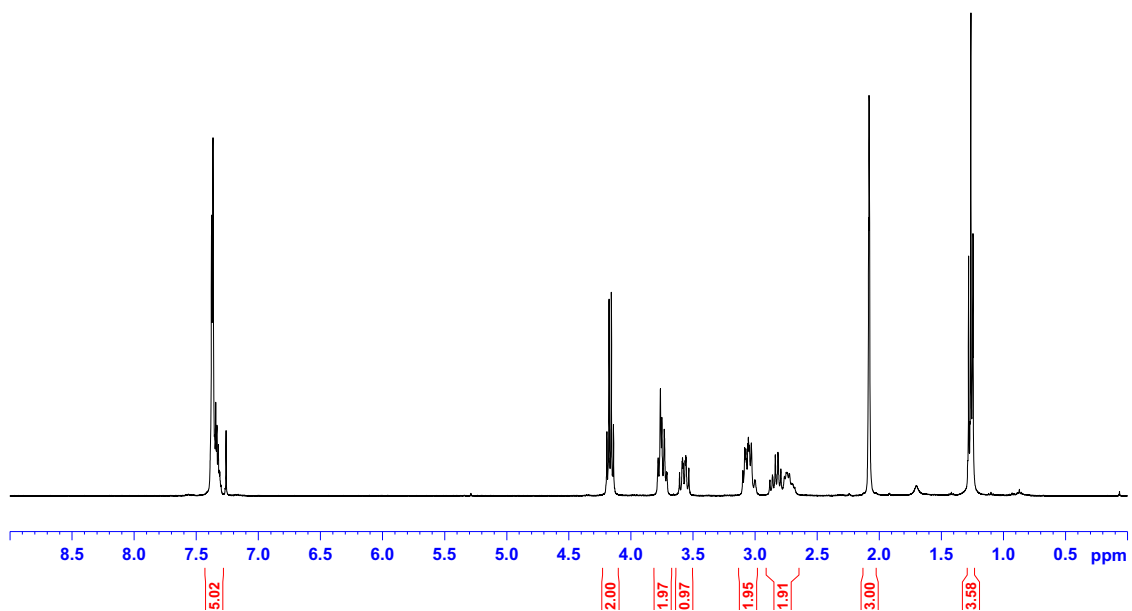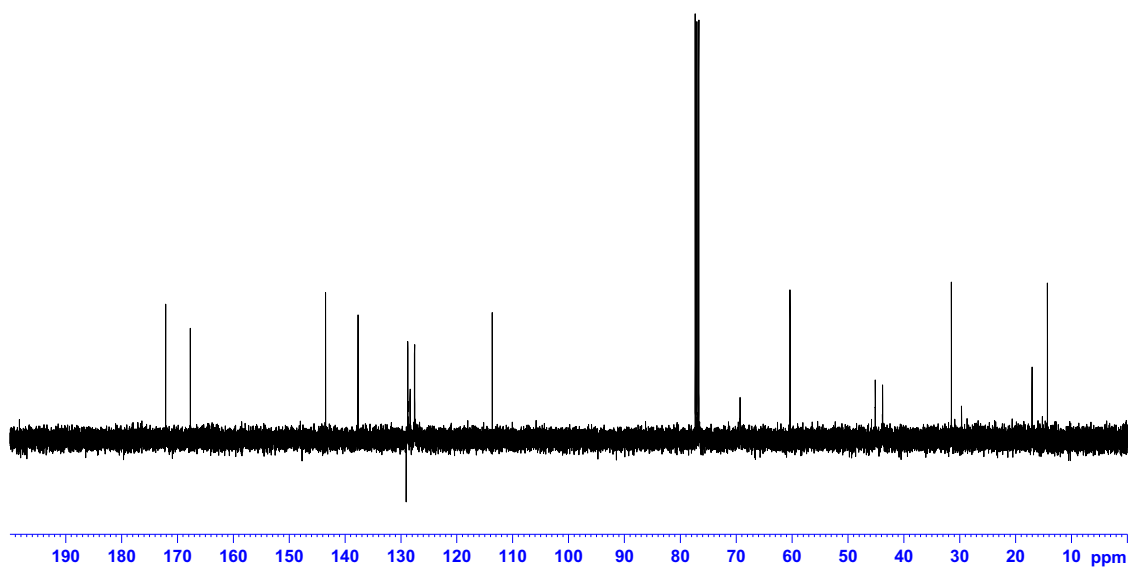

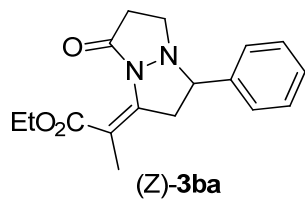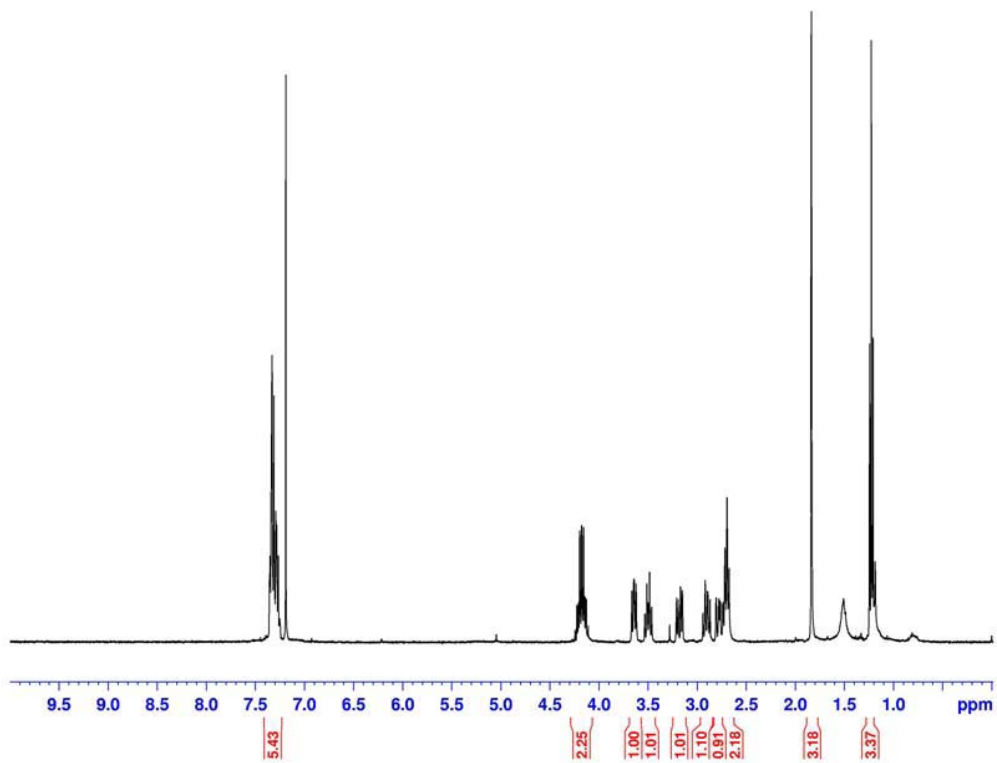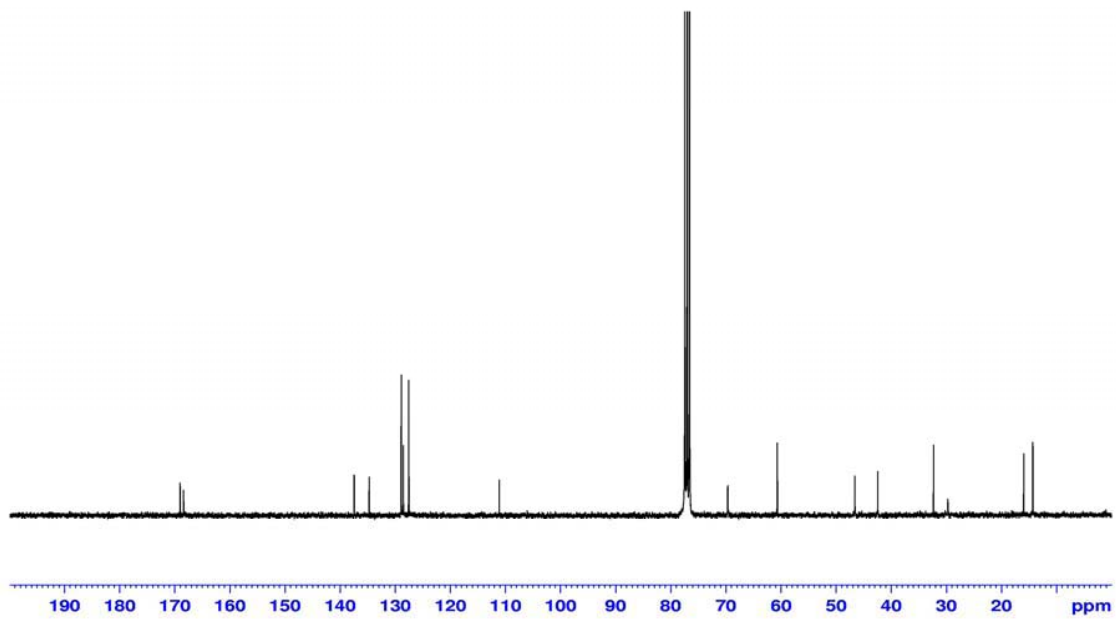



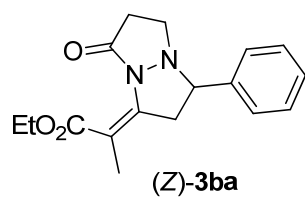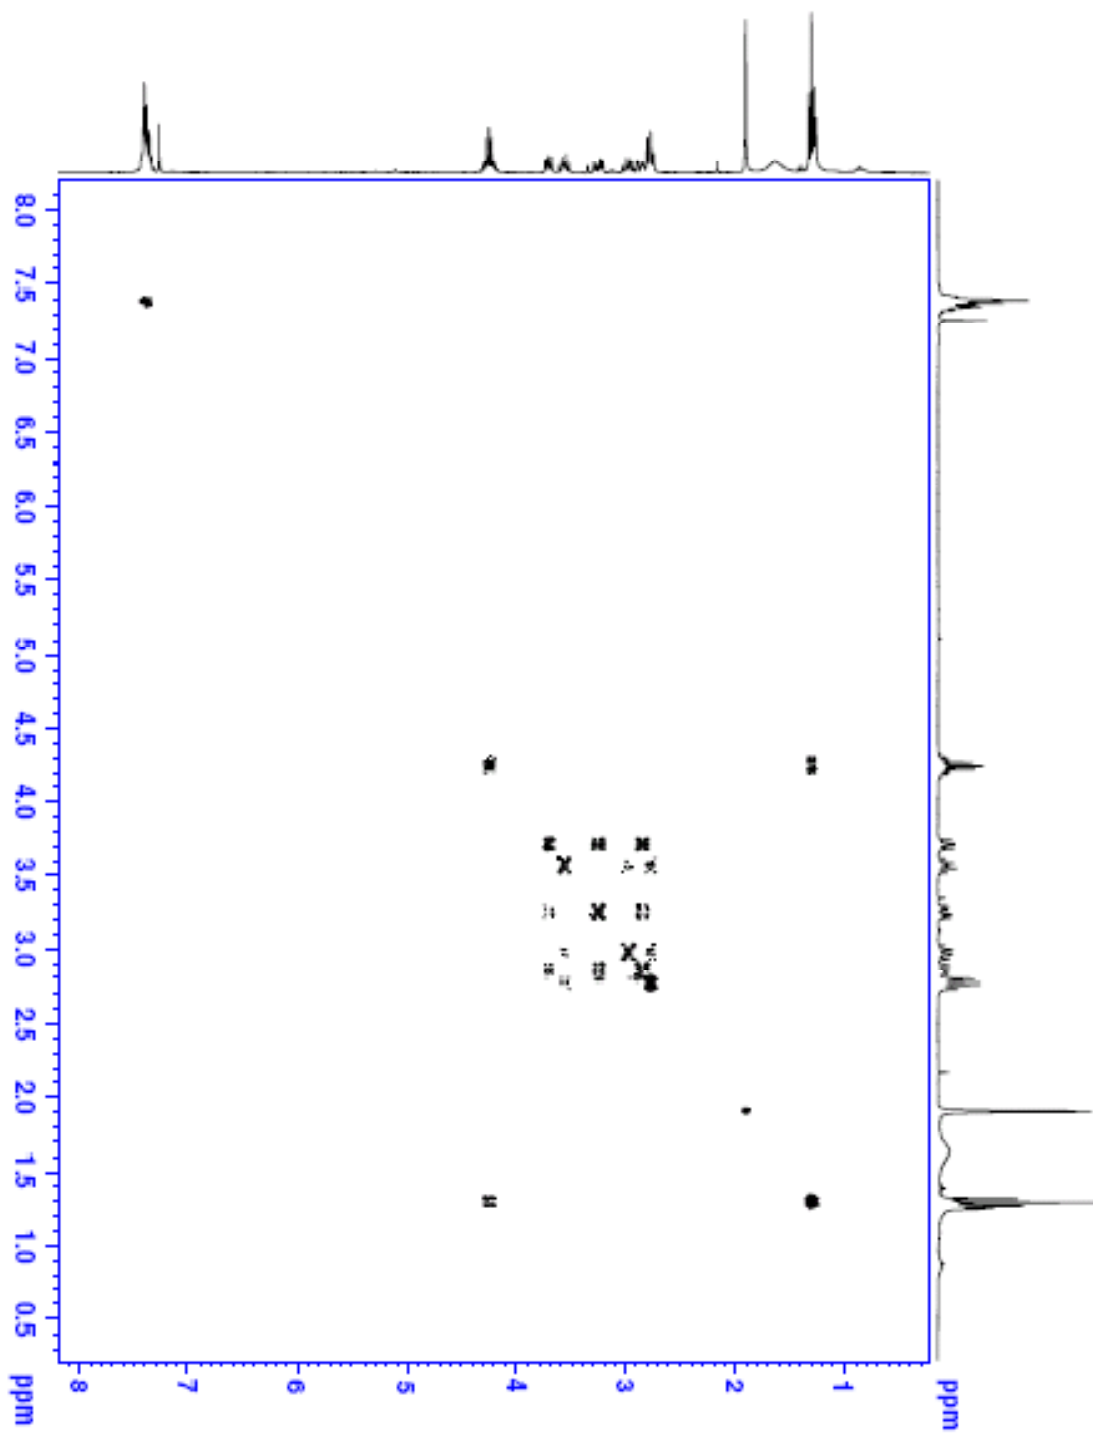

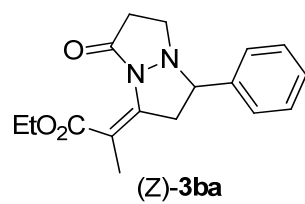

2D NMR NOESY

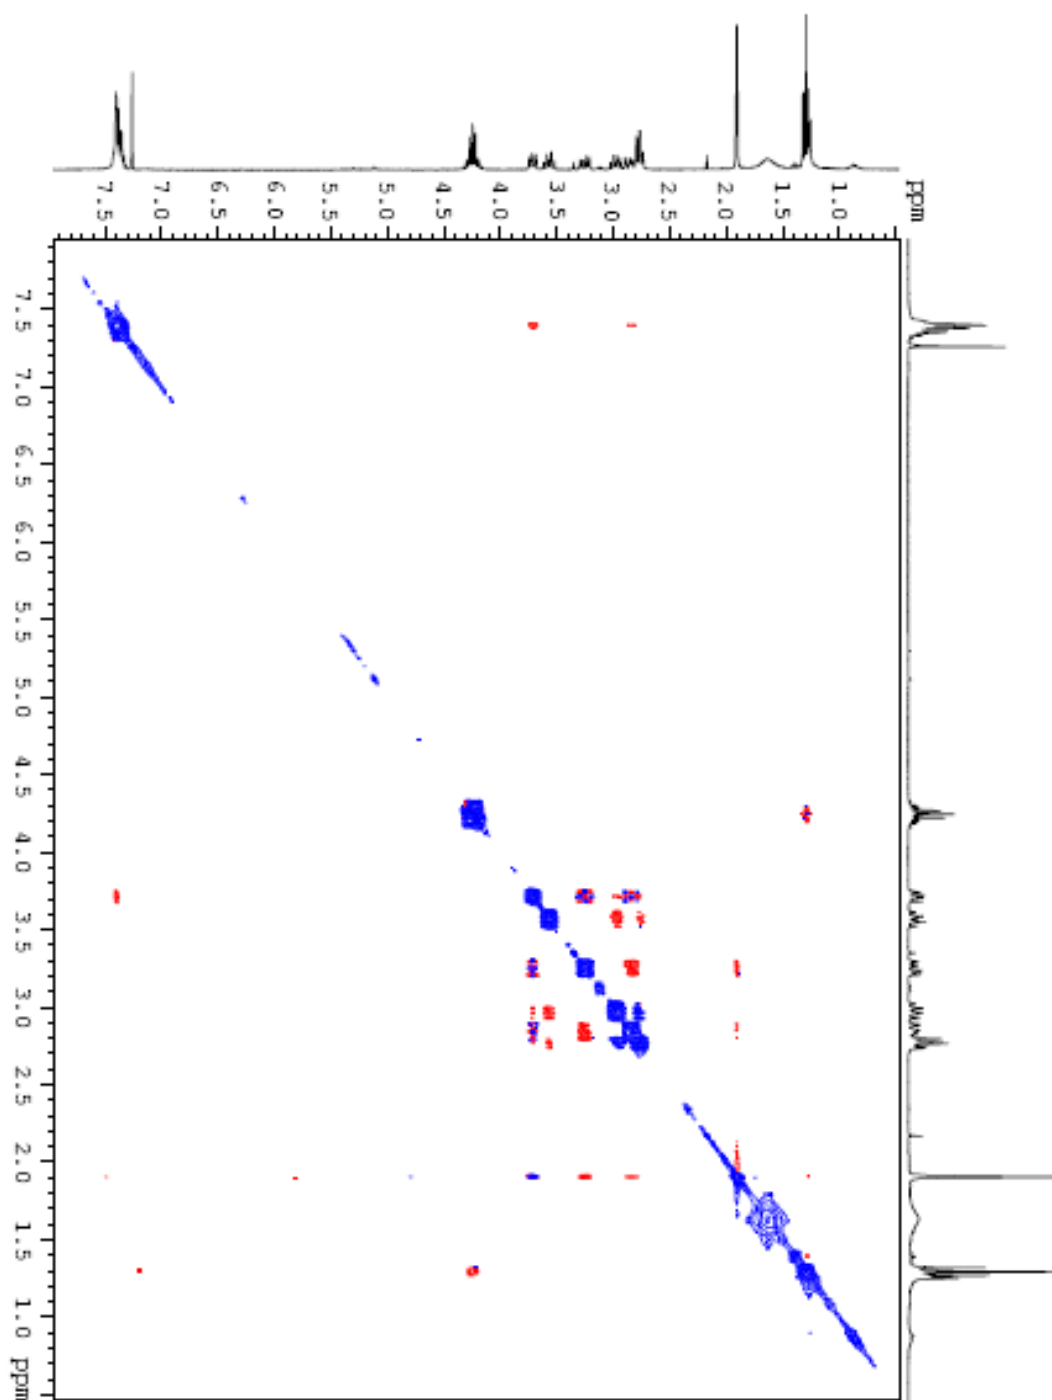

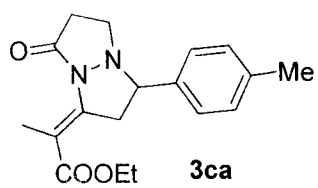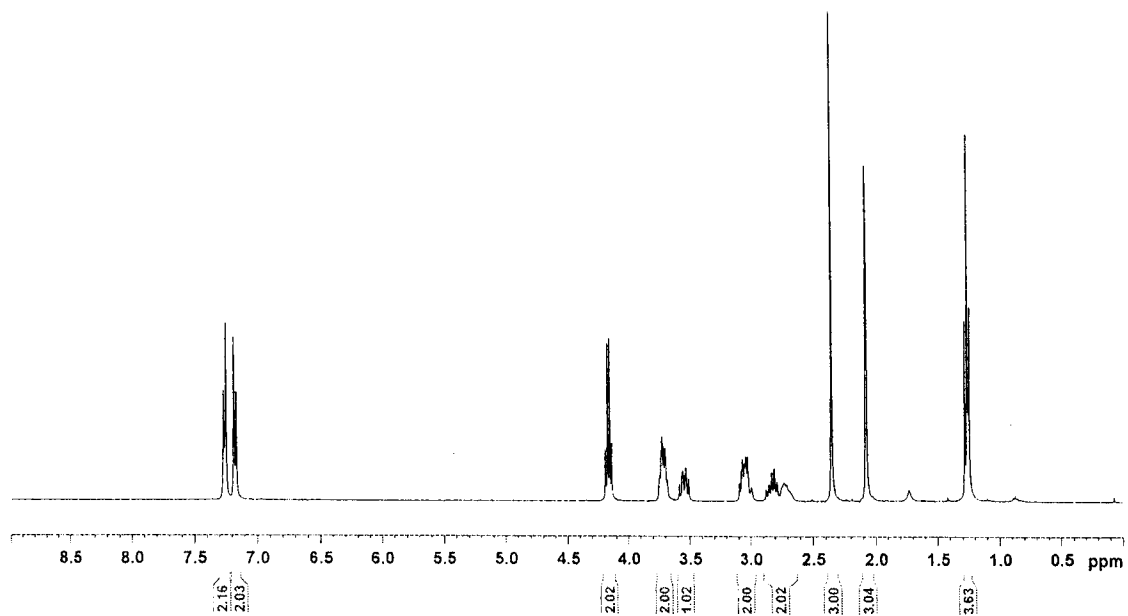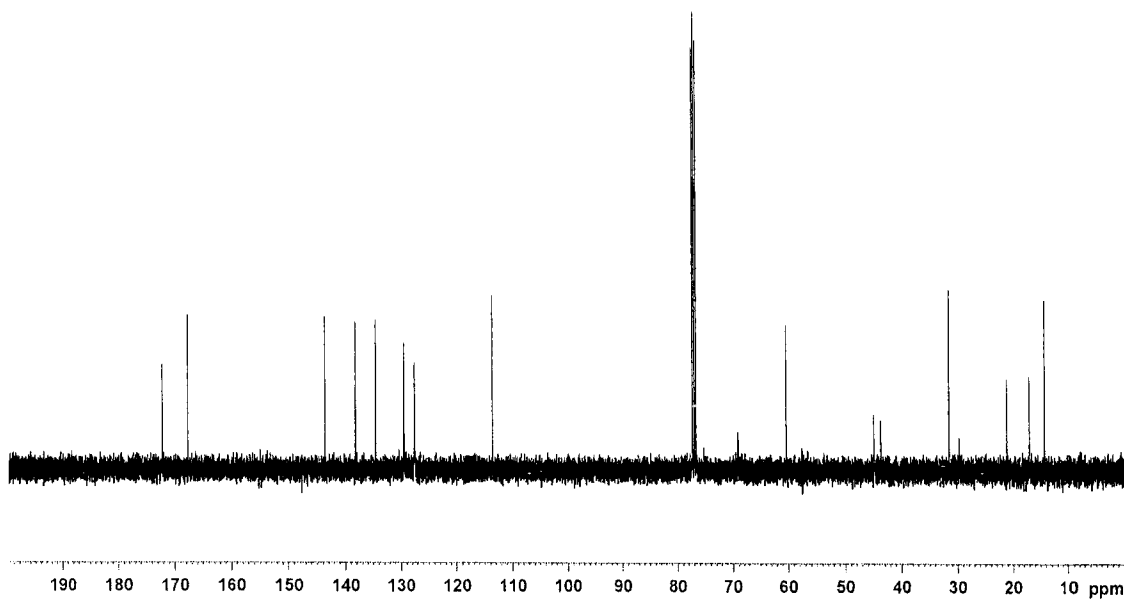

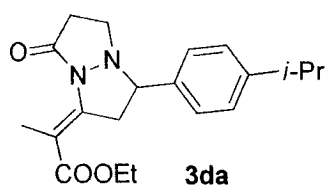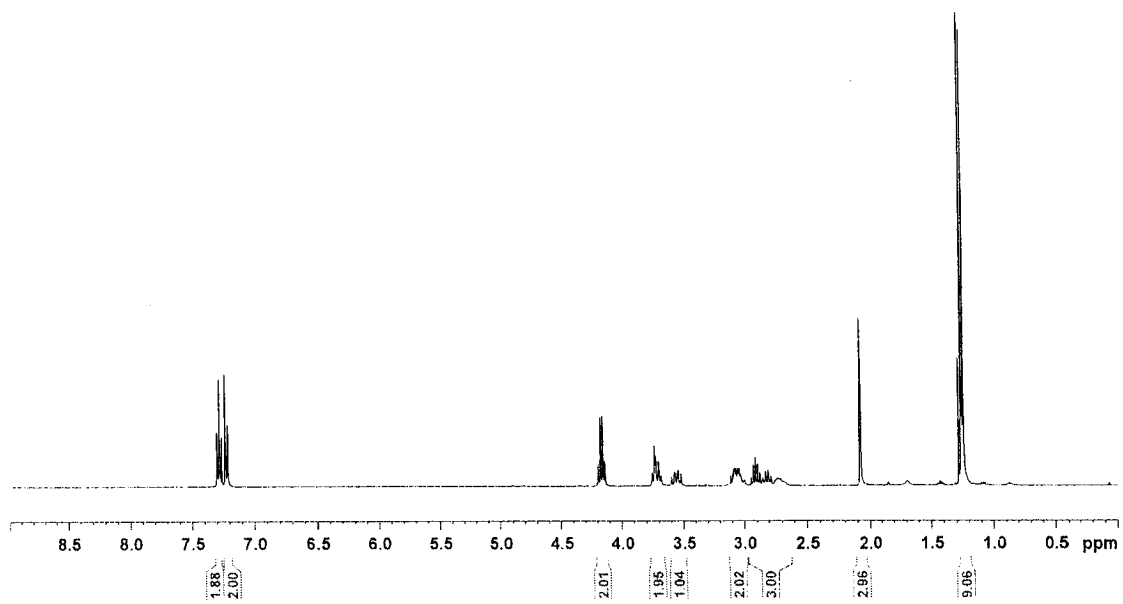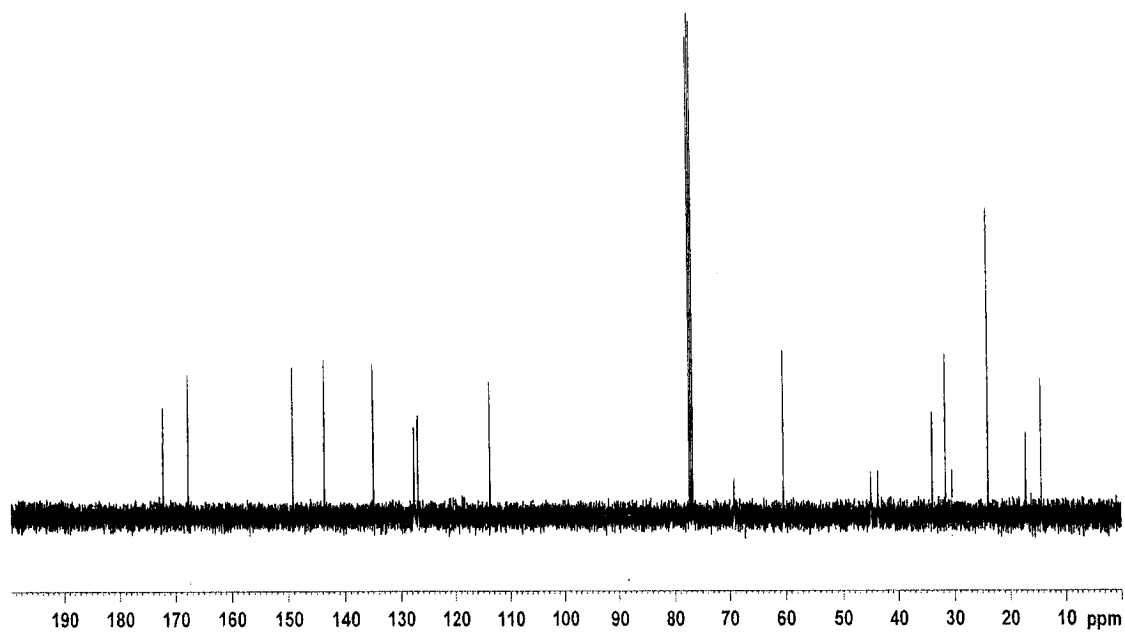

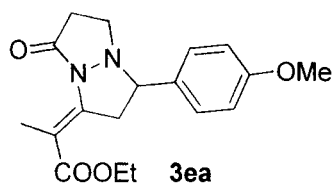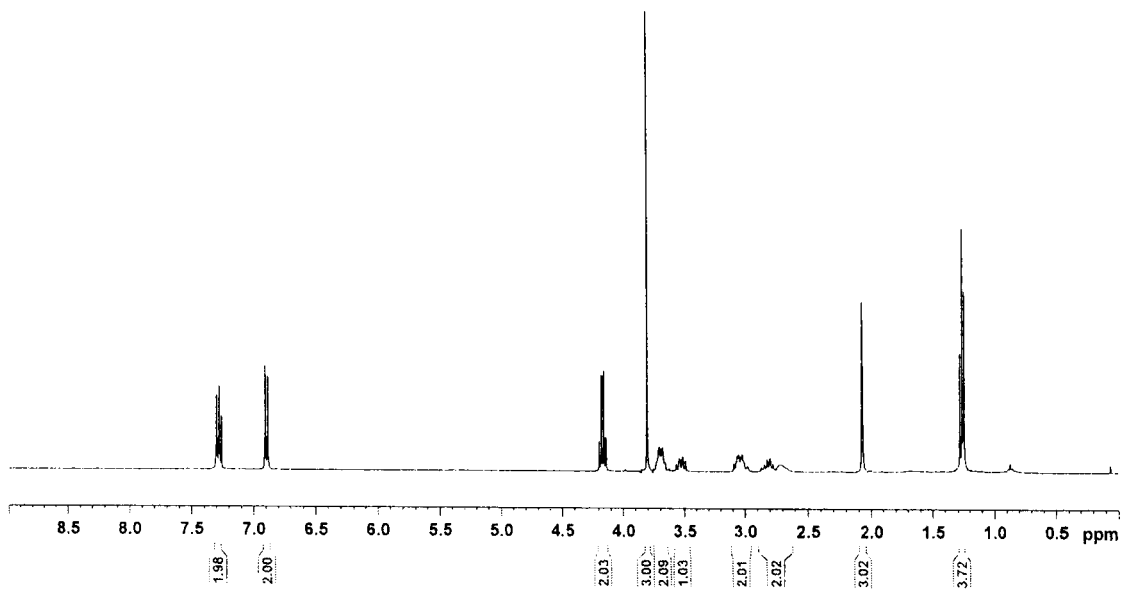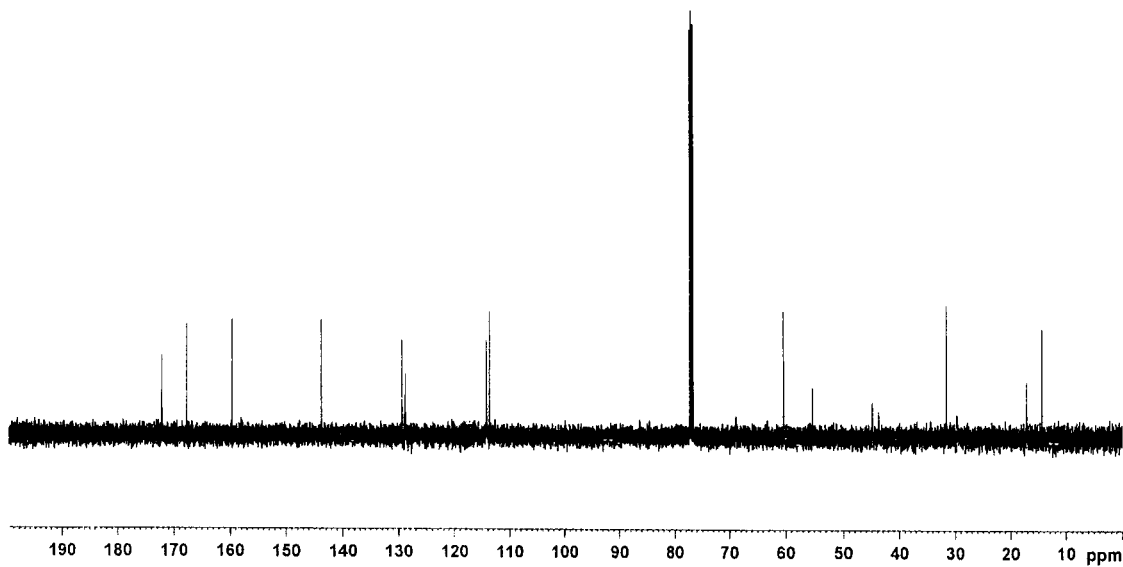

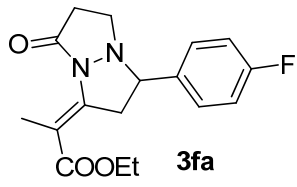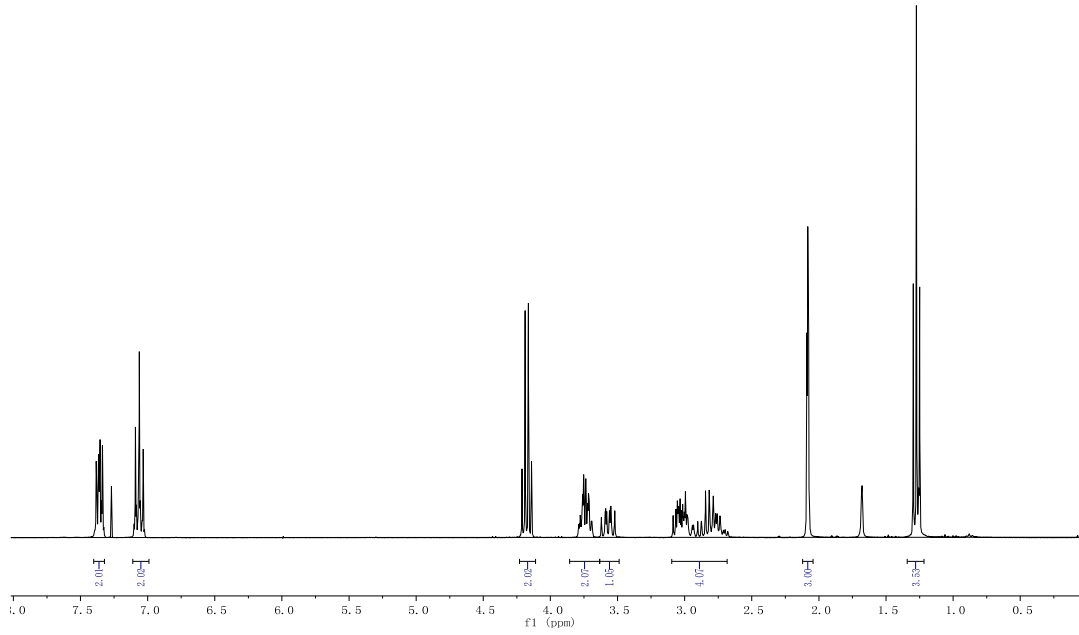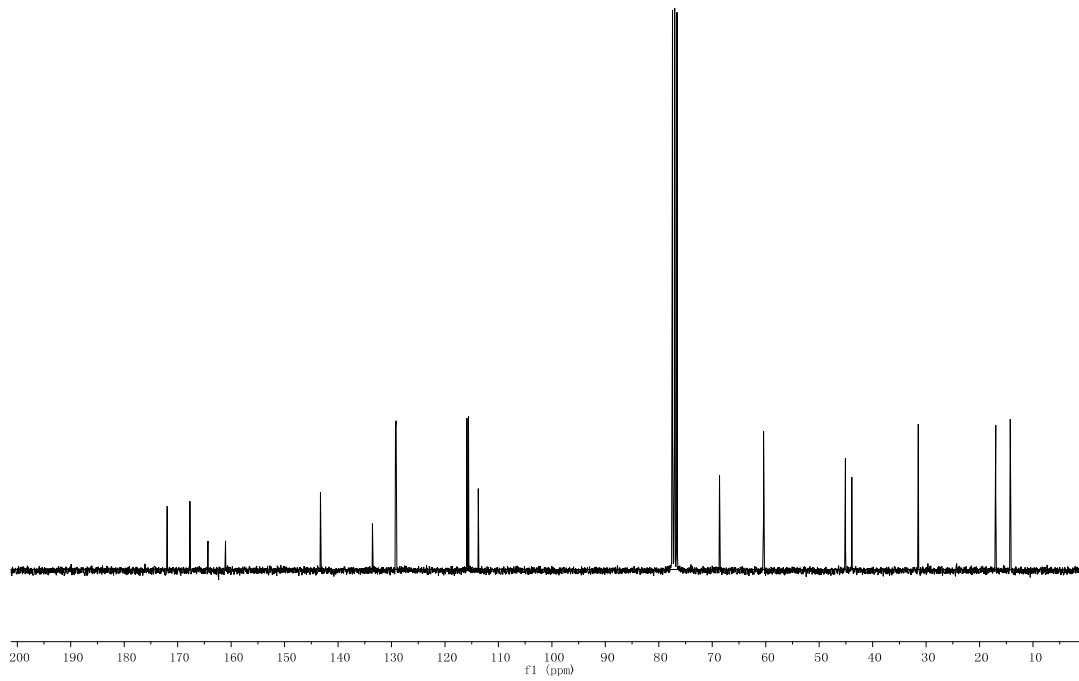

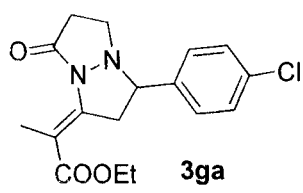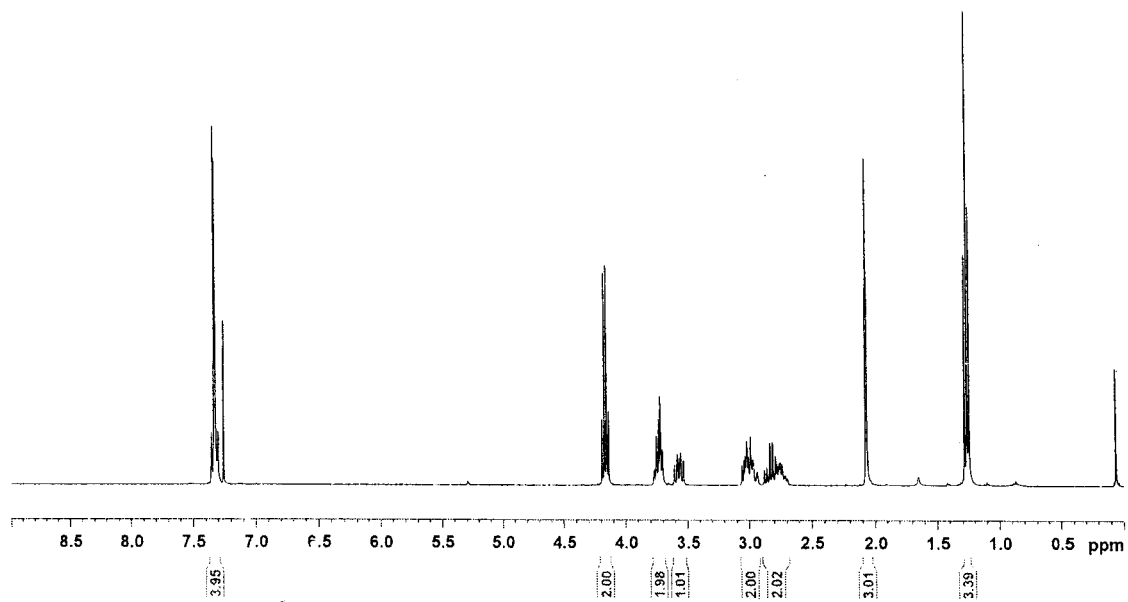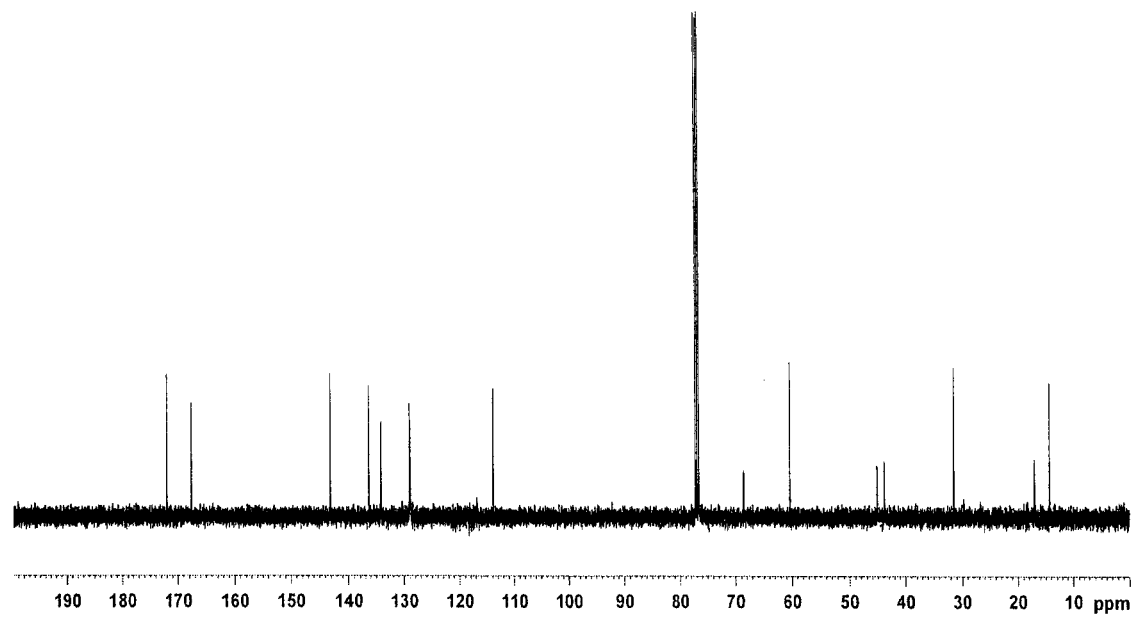

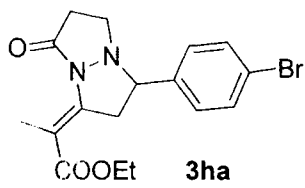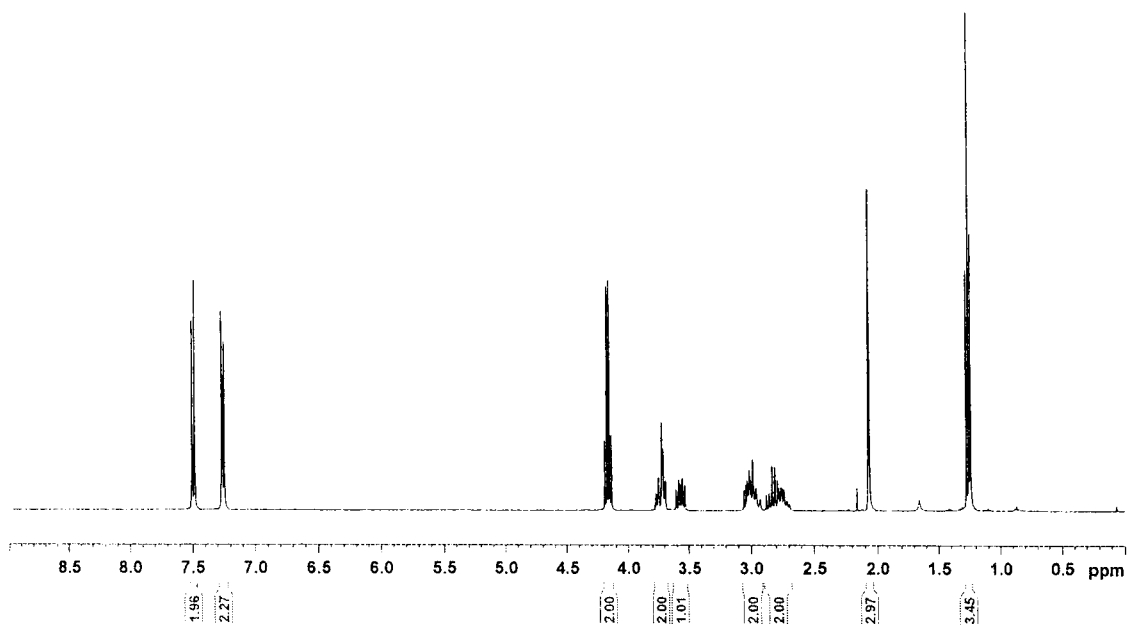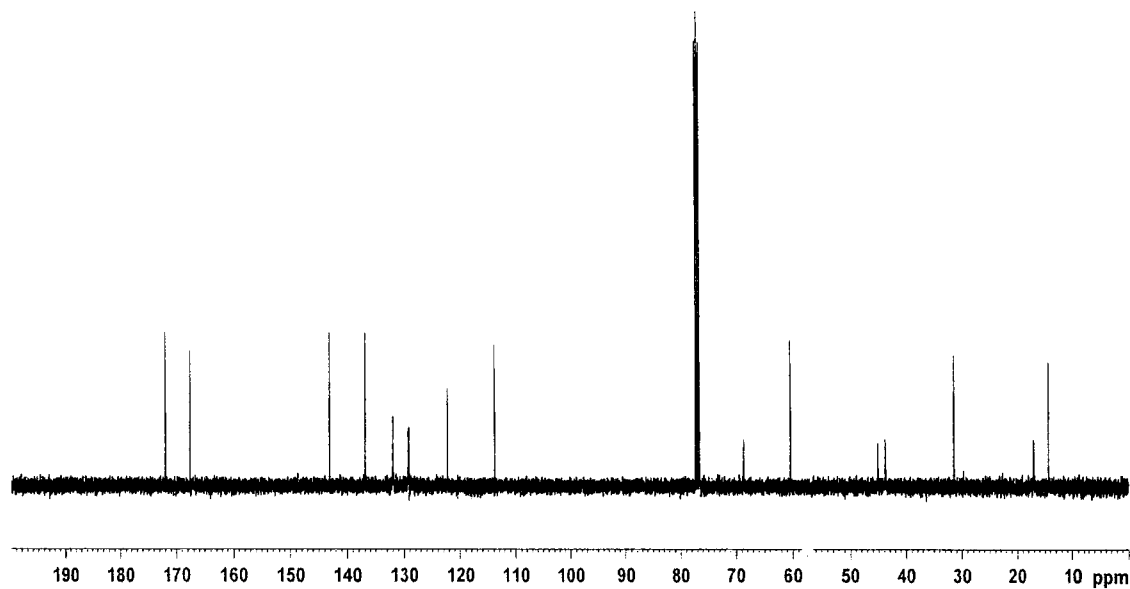



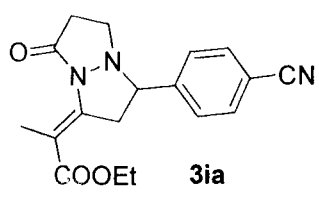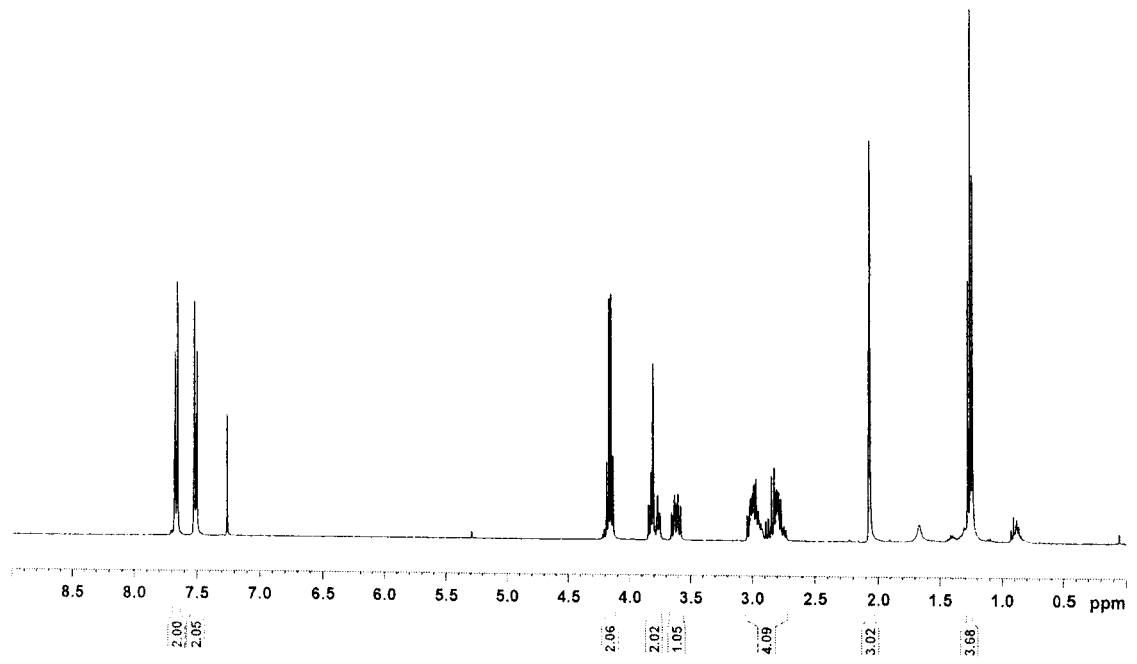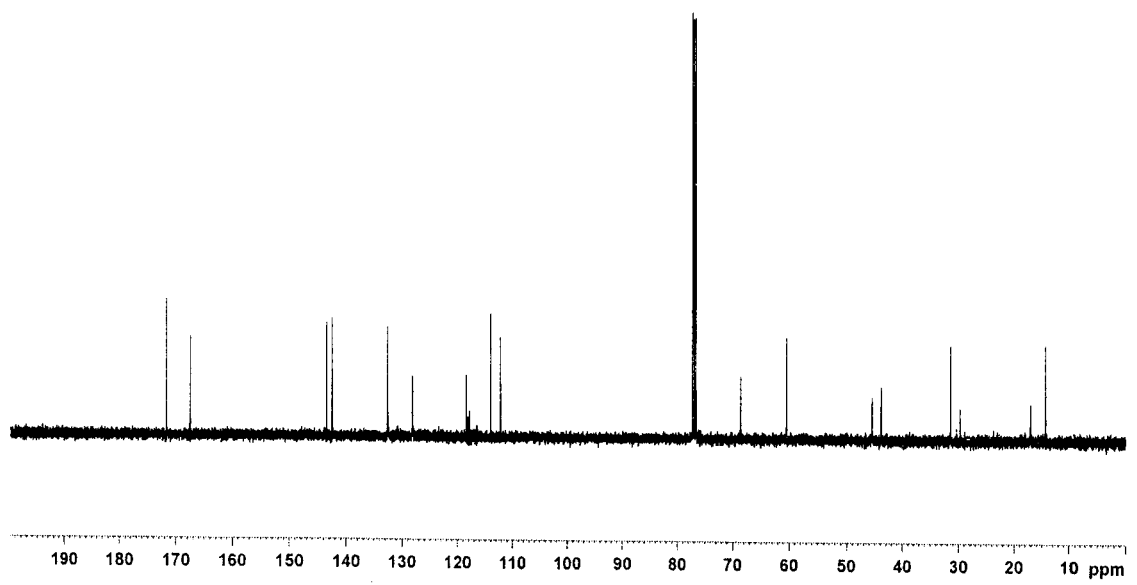

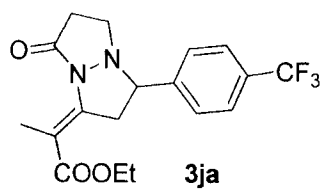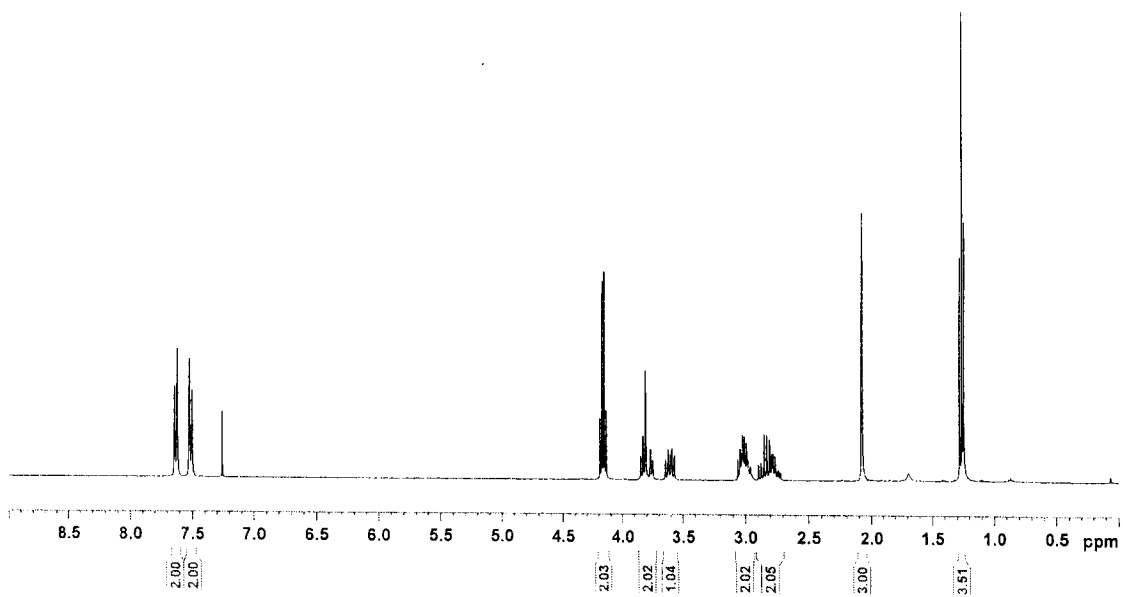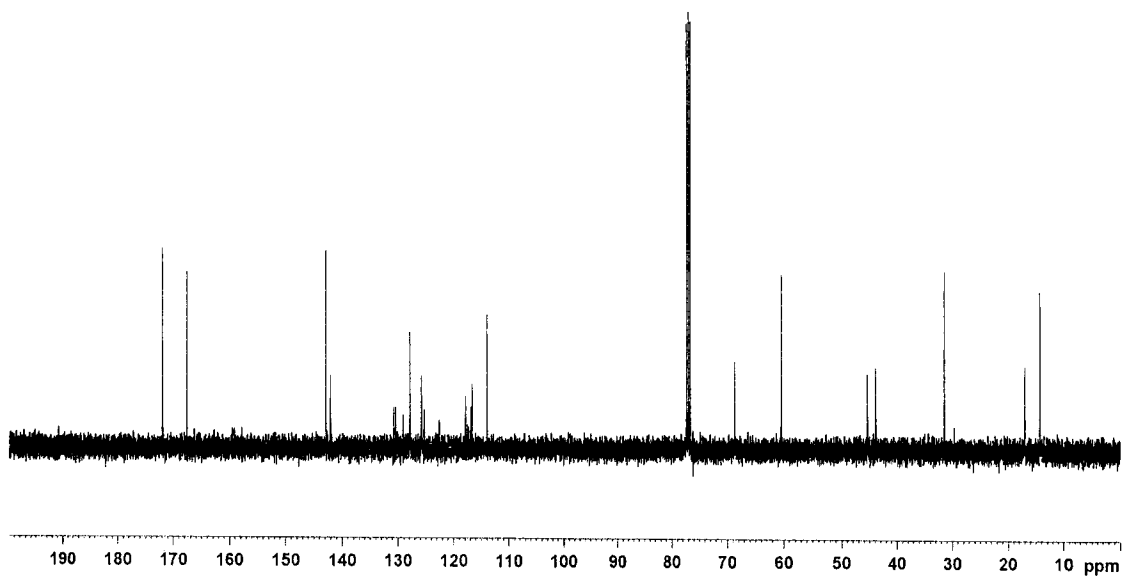

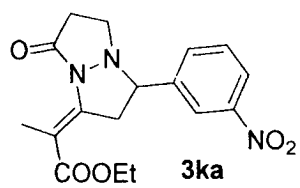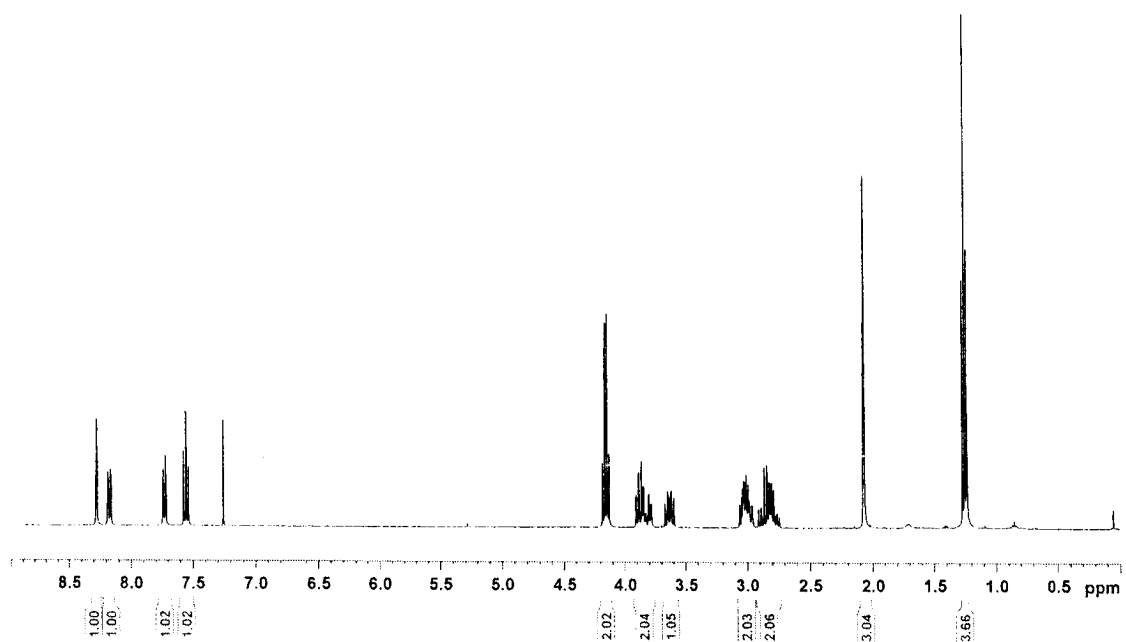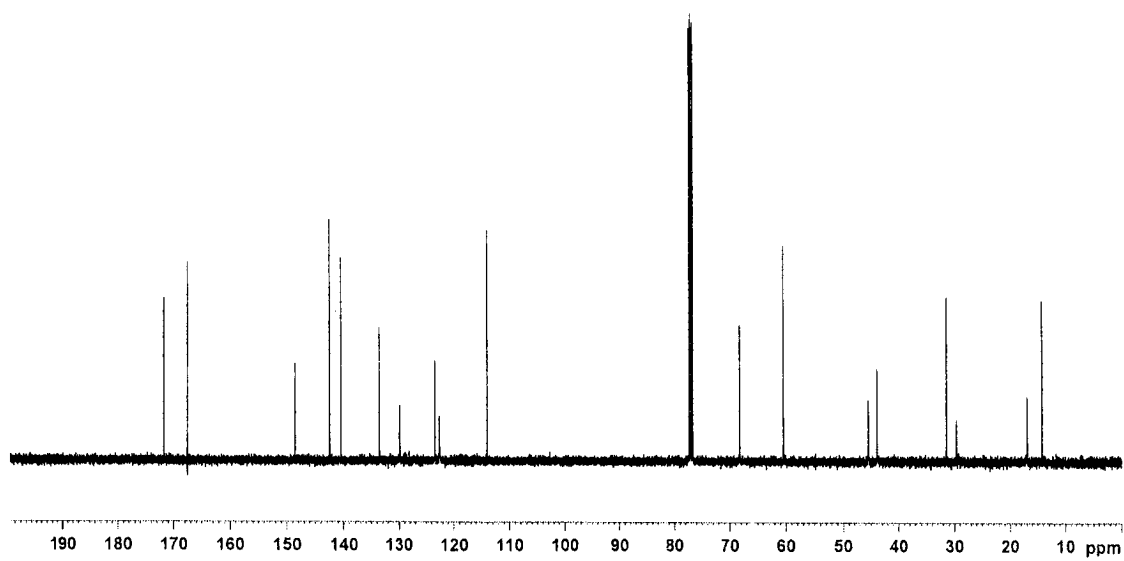

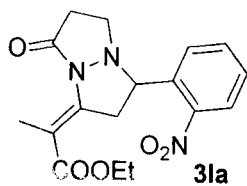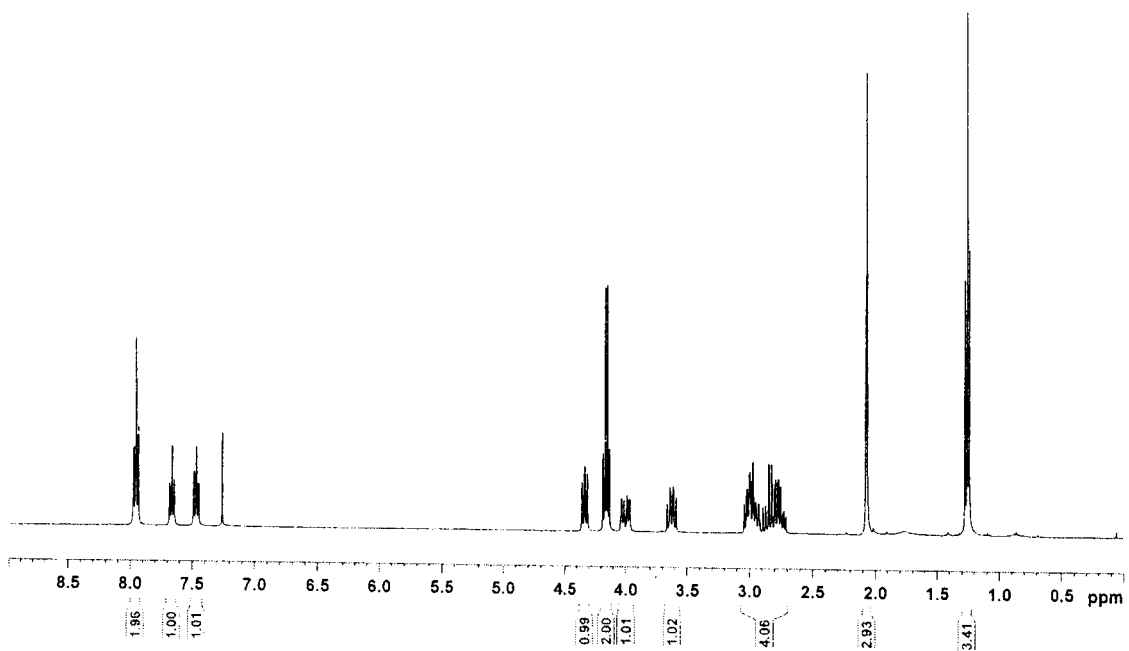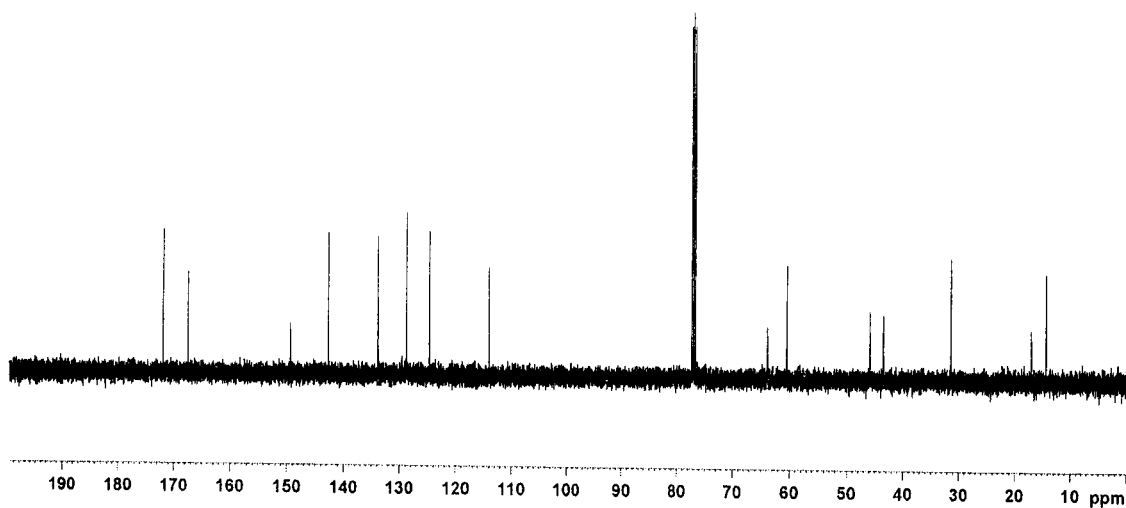

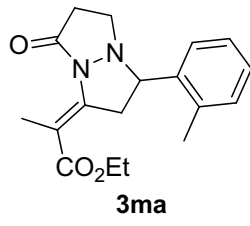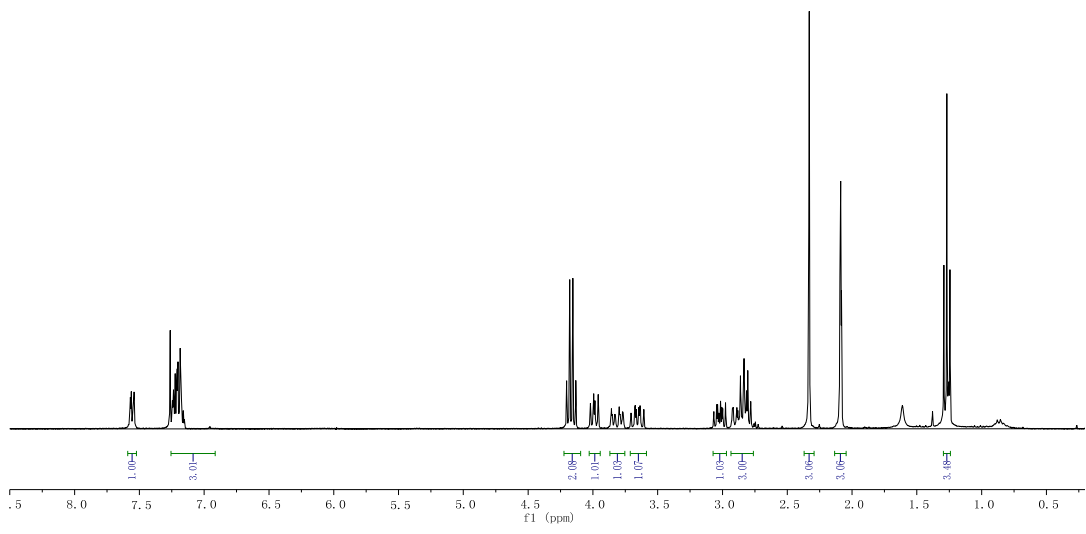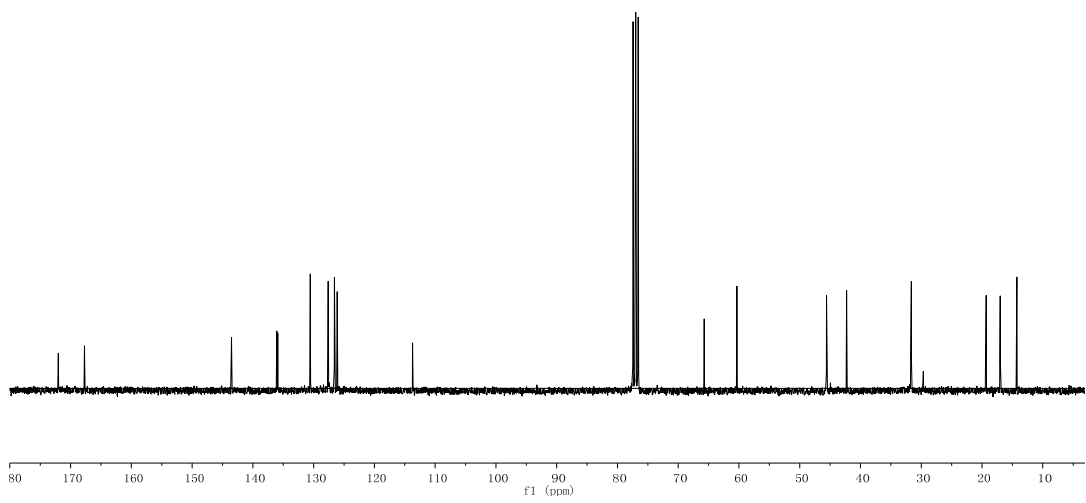

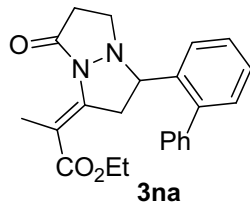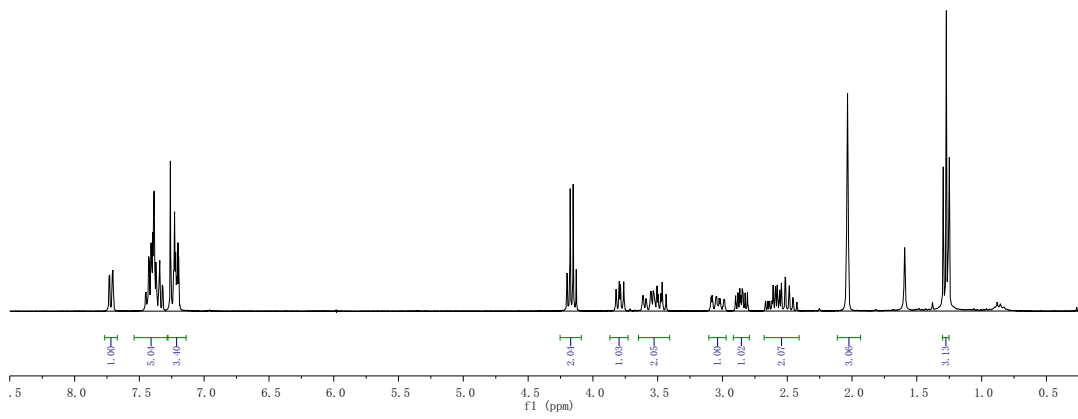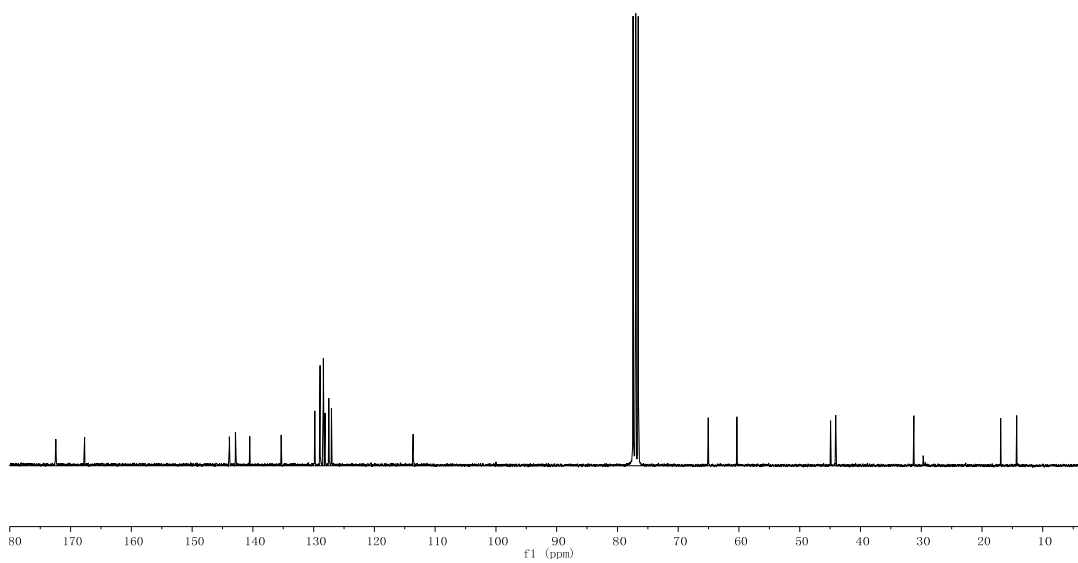

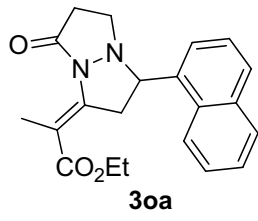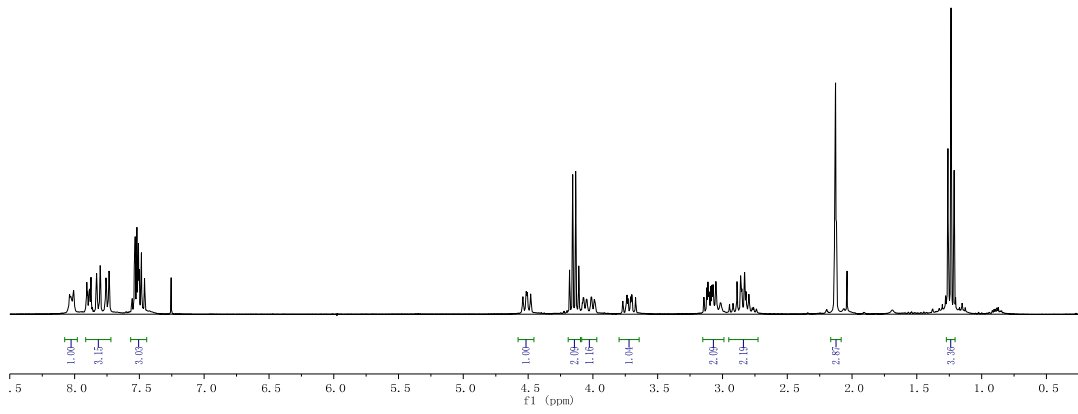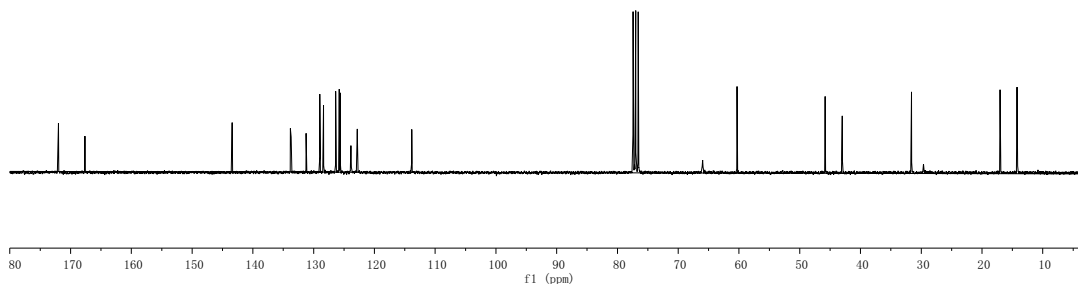

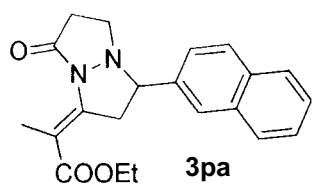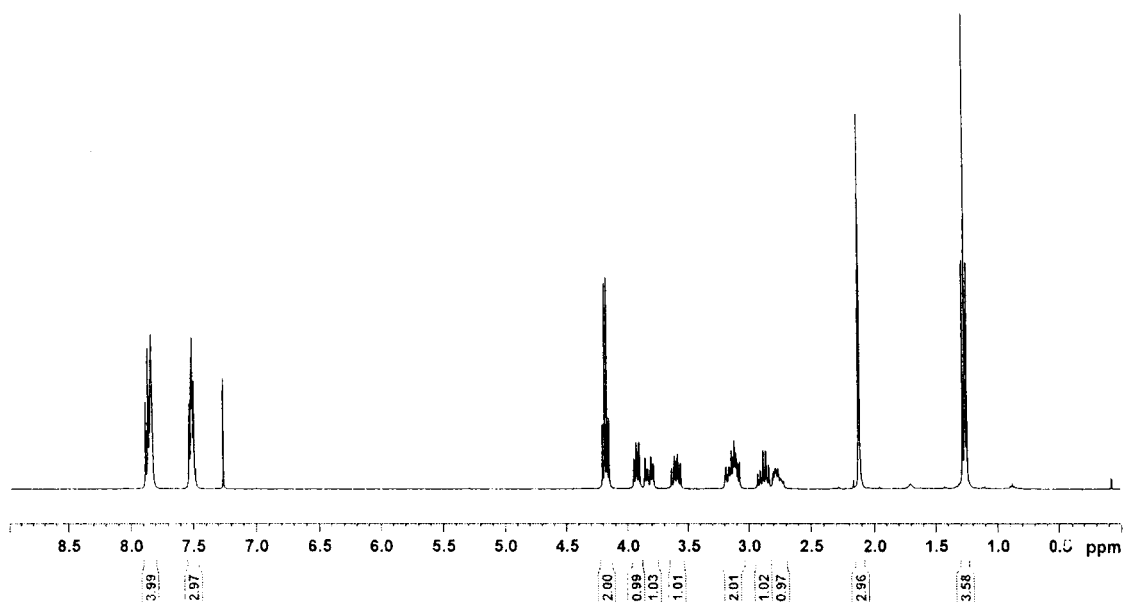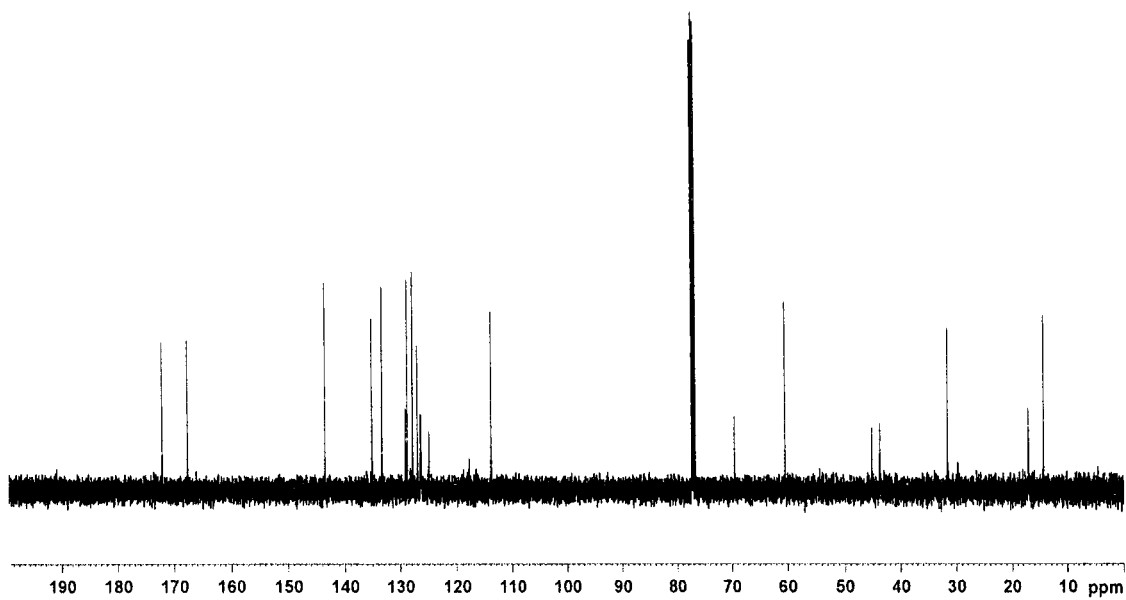



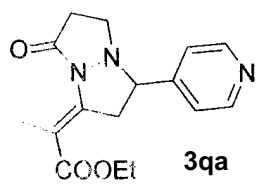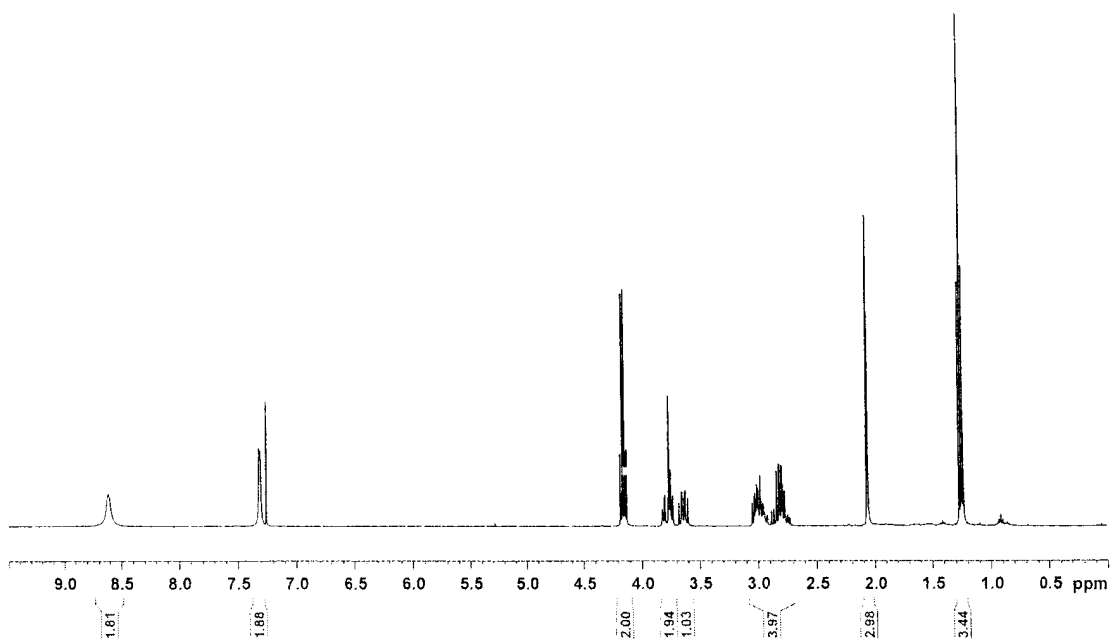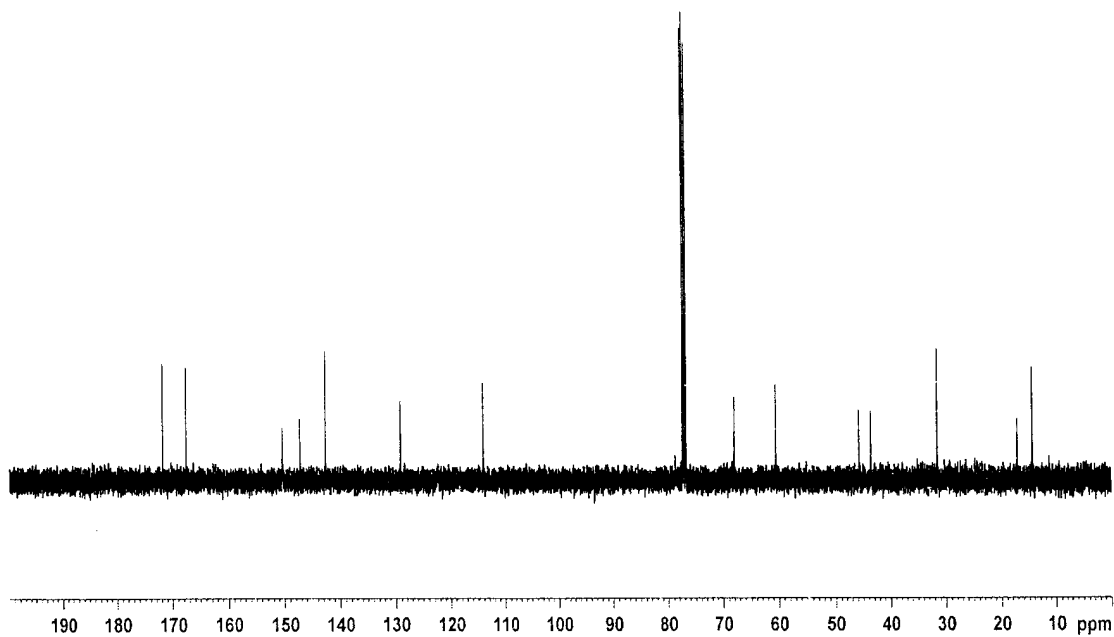

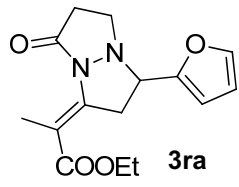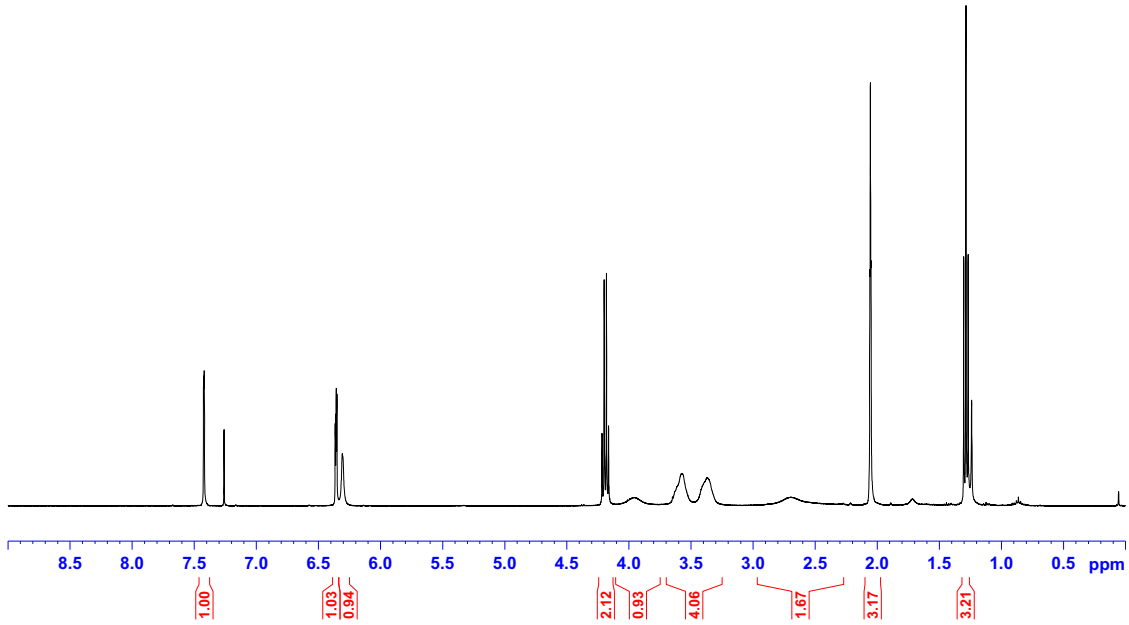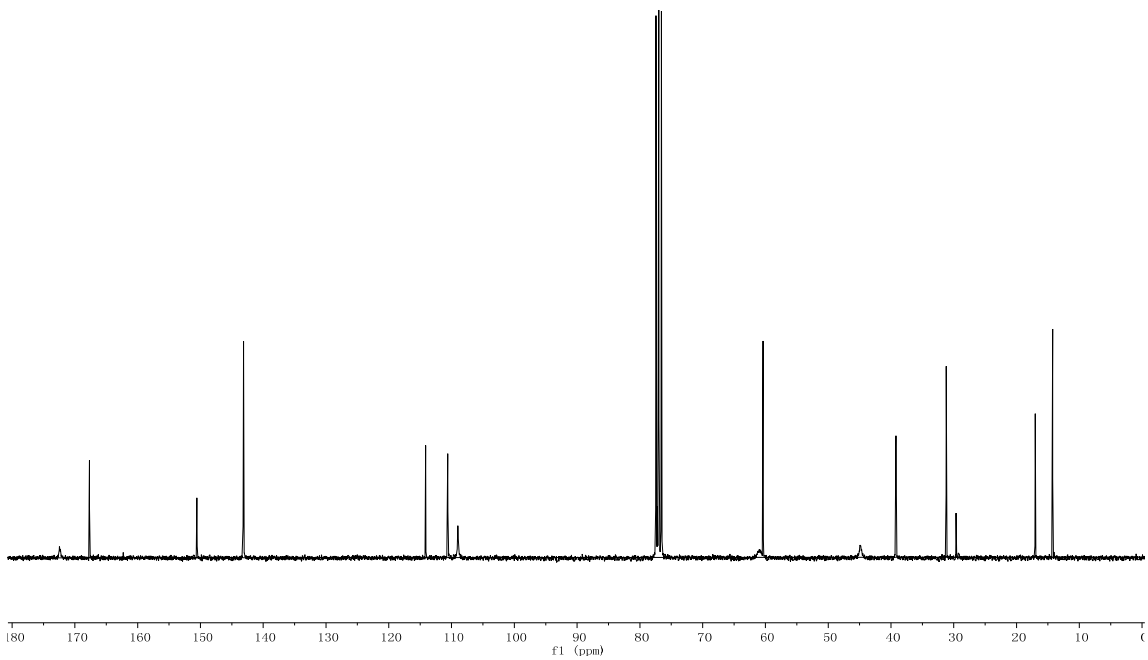

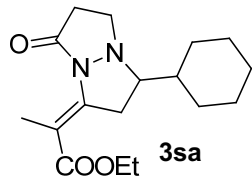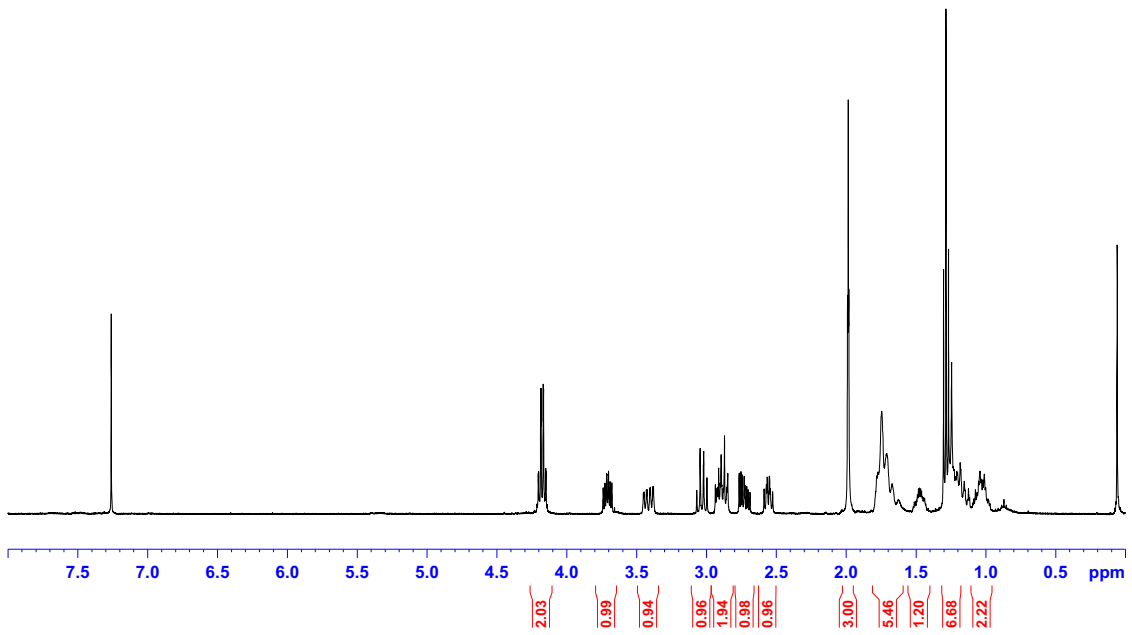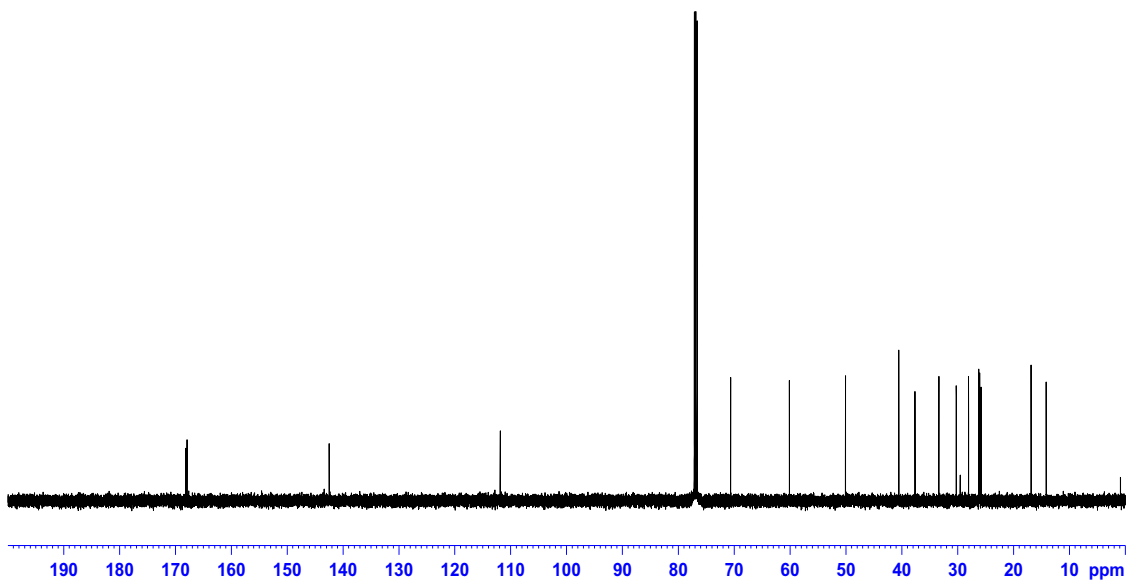

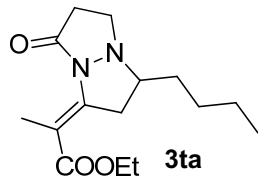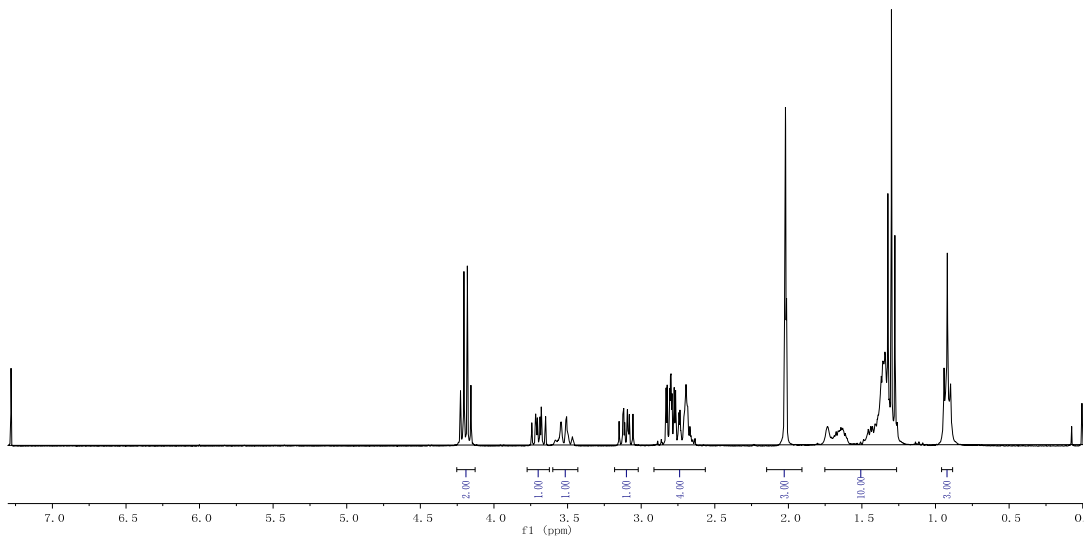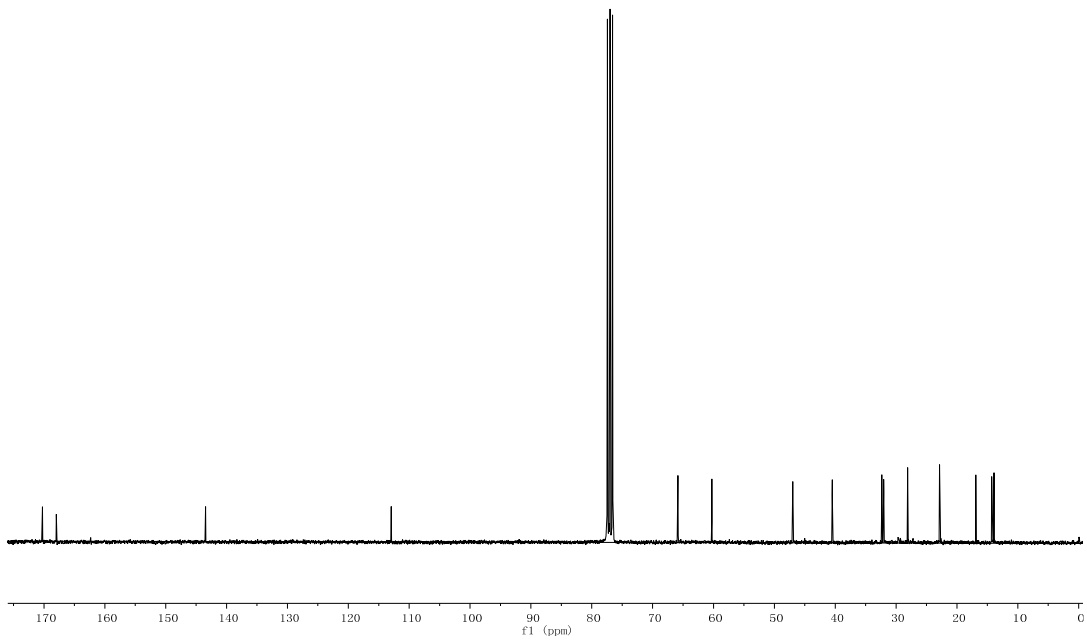

S92

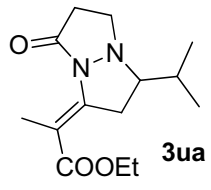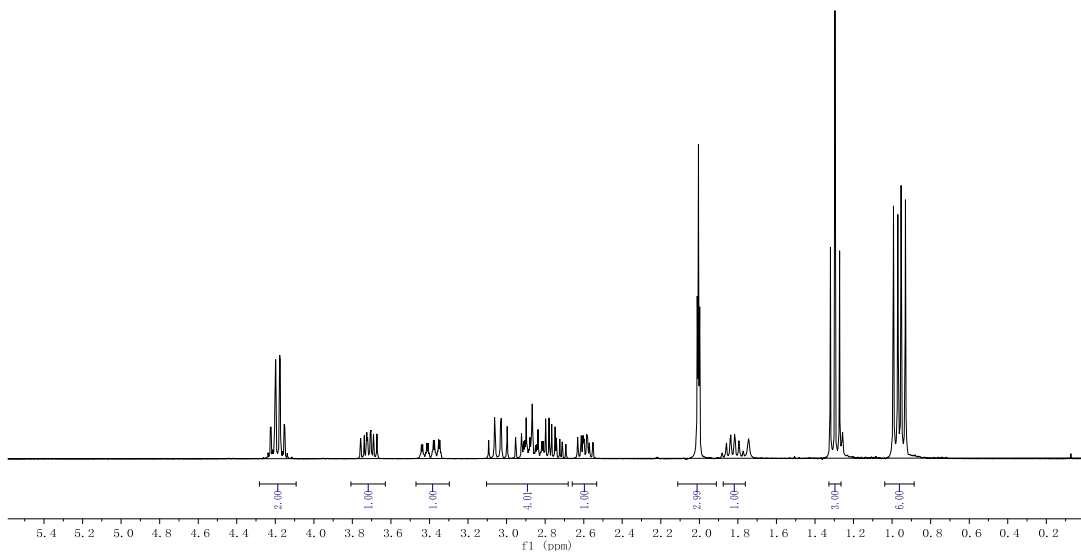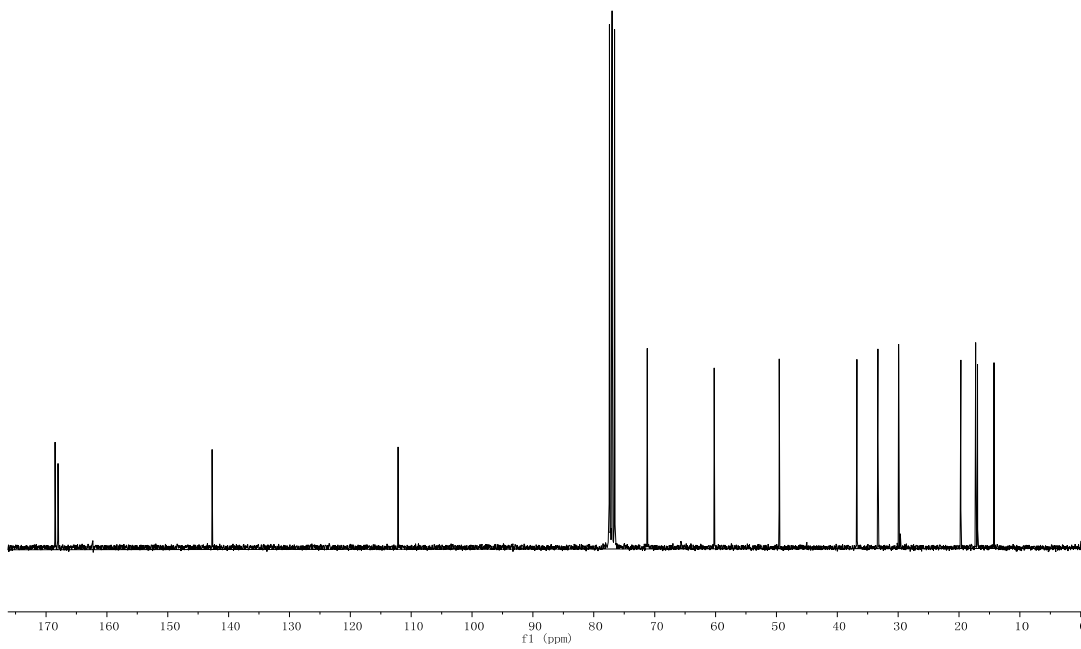

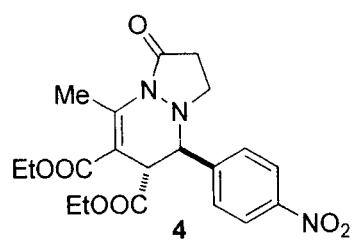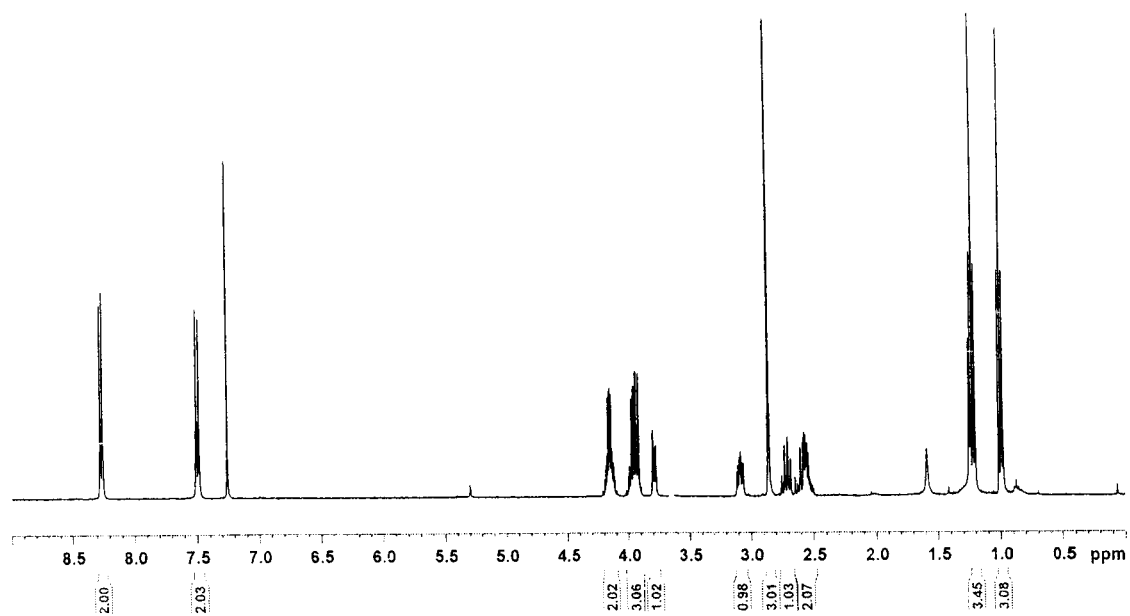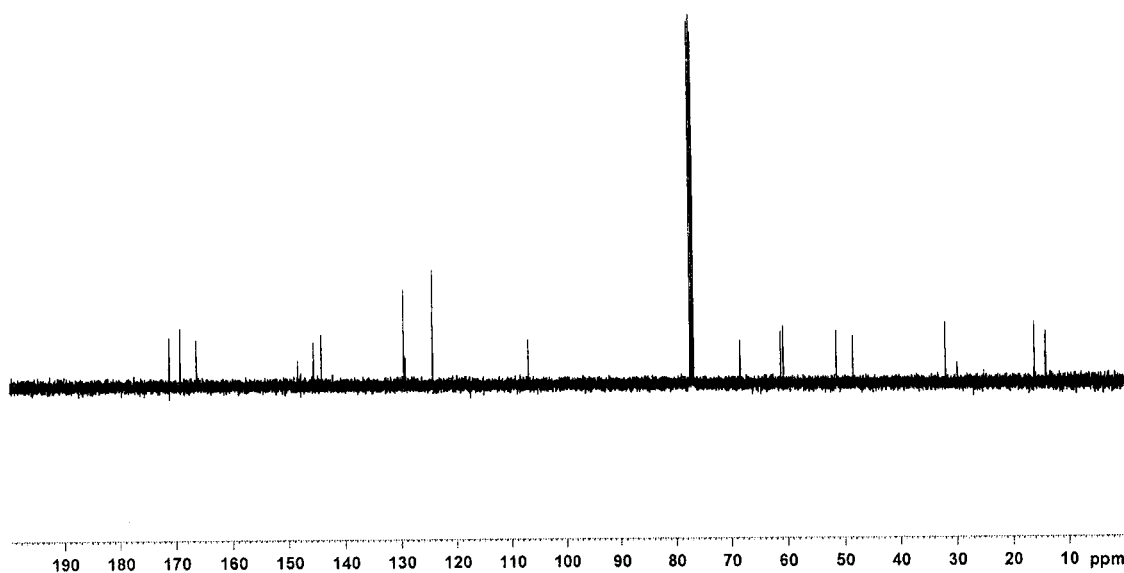

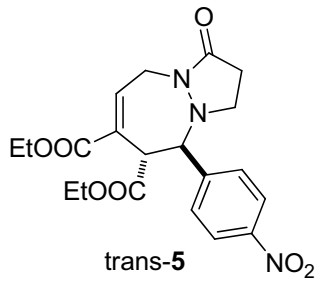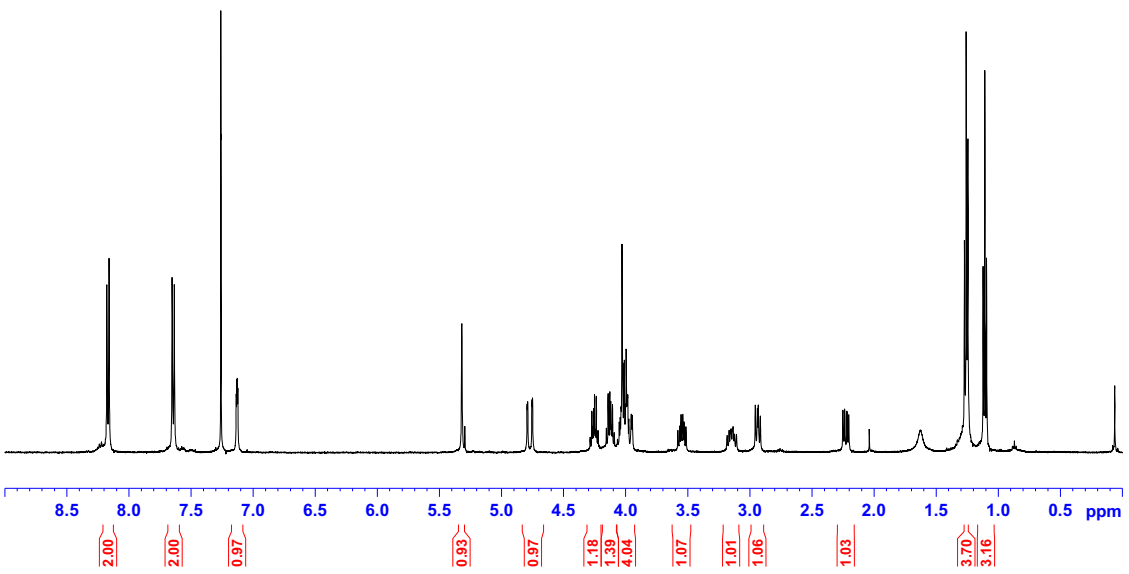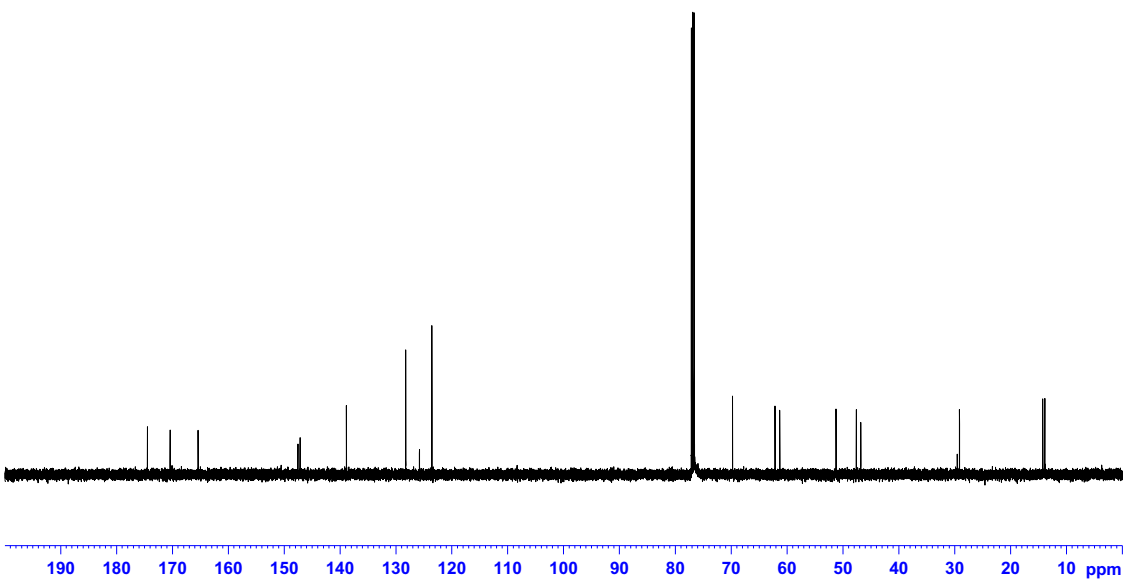

S95

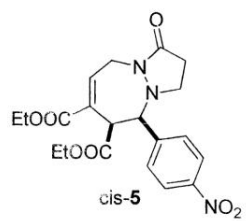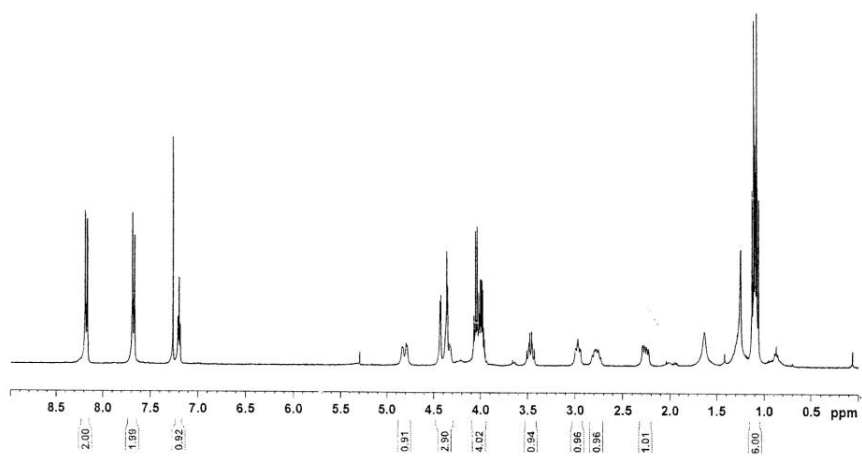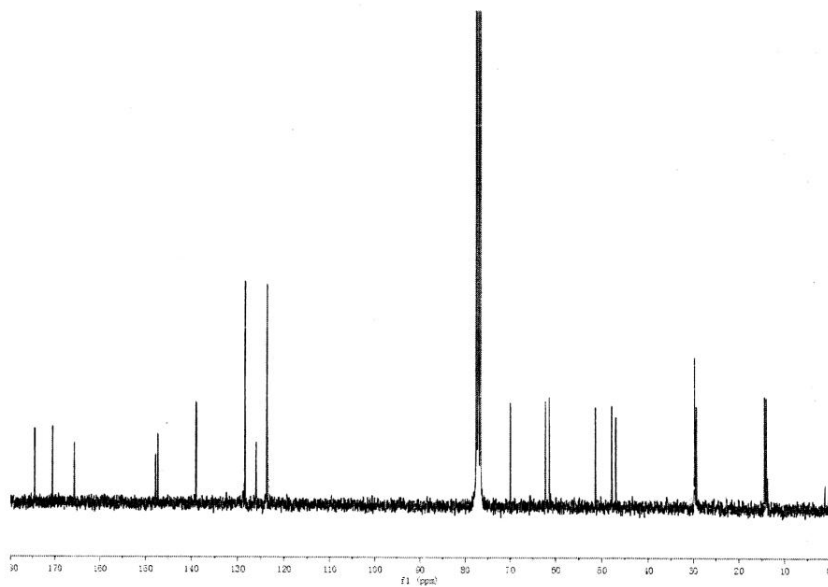



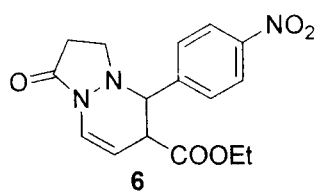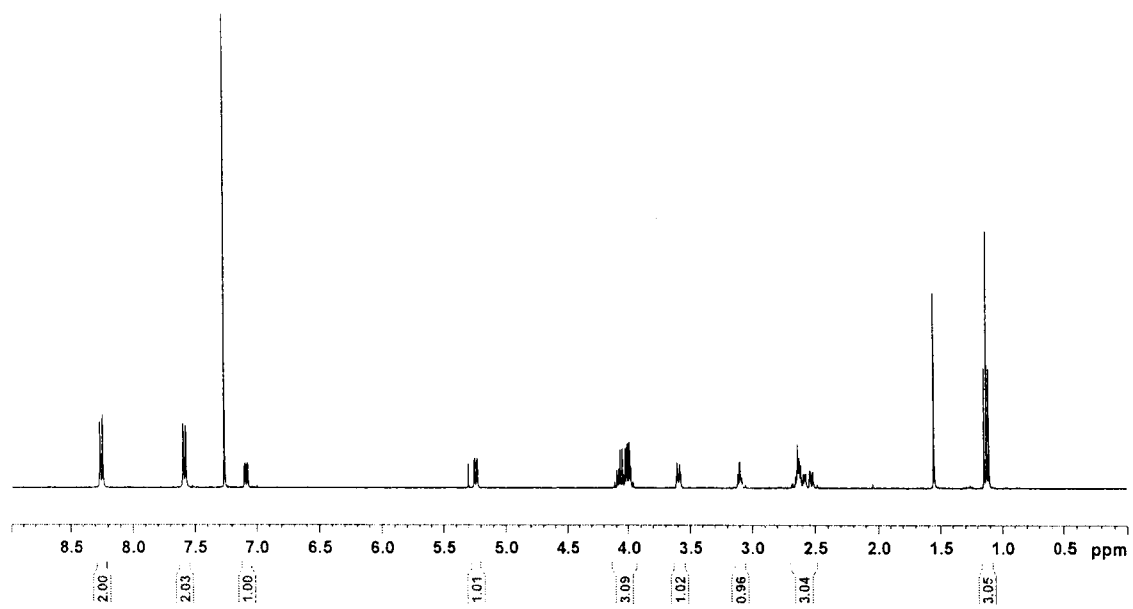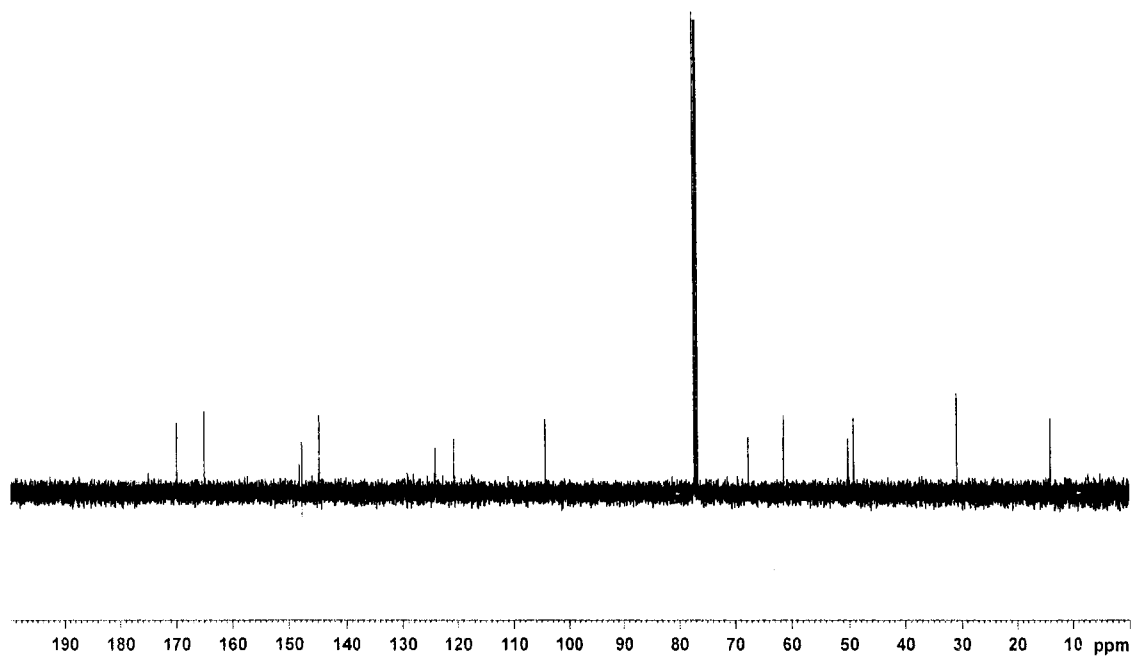

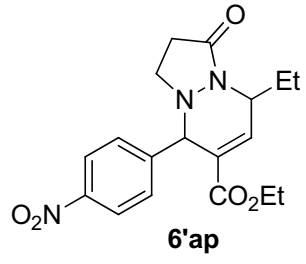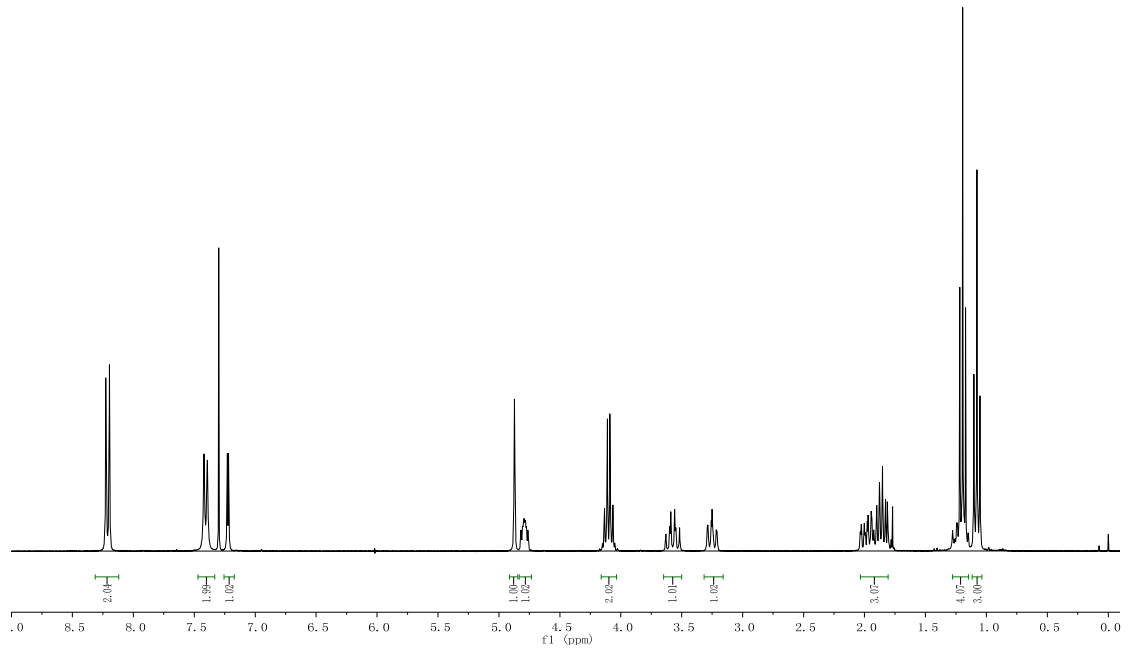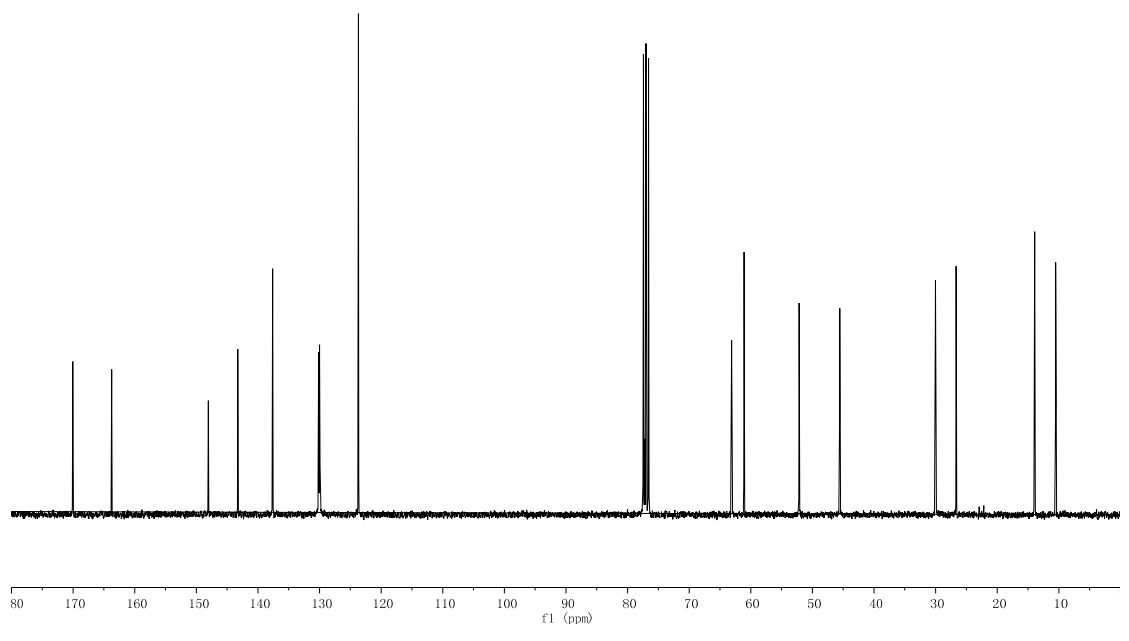

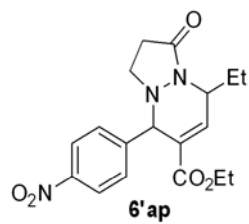

2D NMR COSY

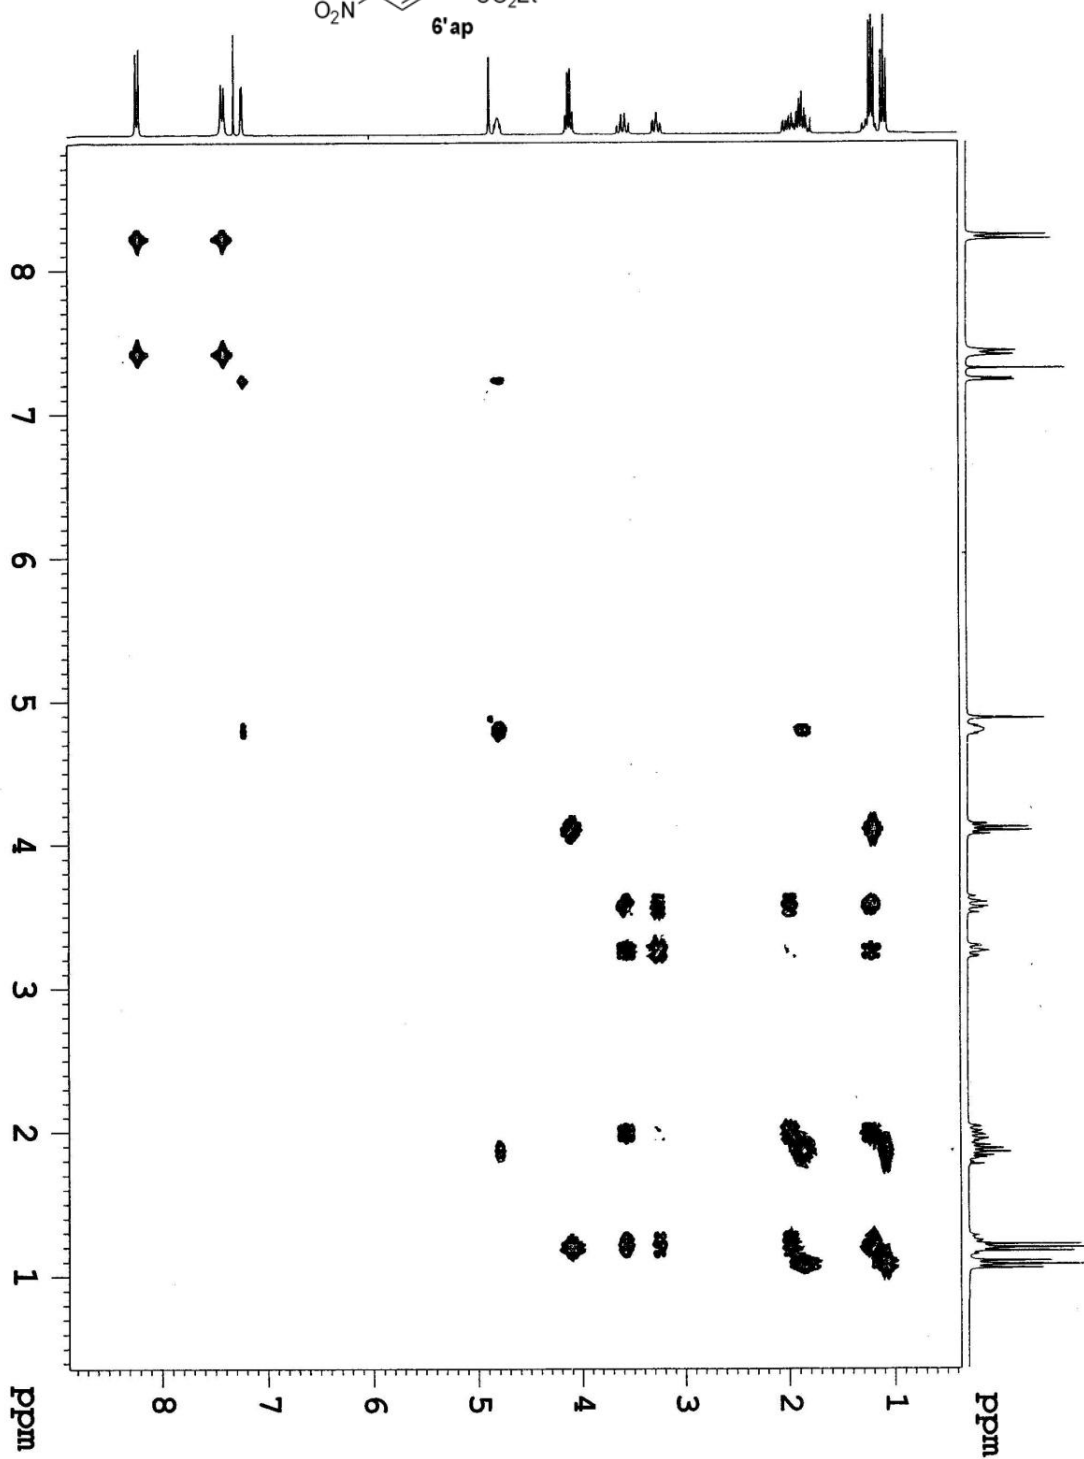

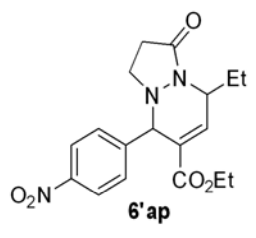

2D NMR HMQC

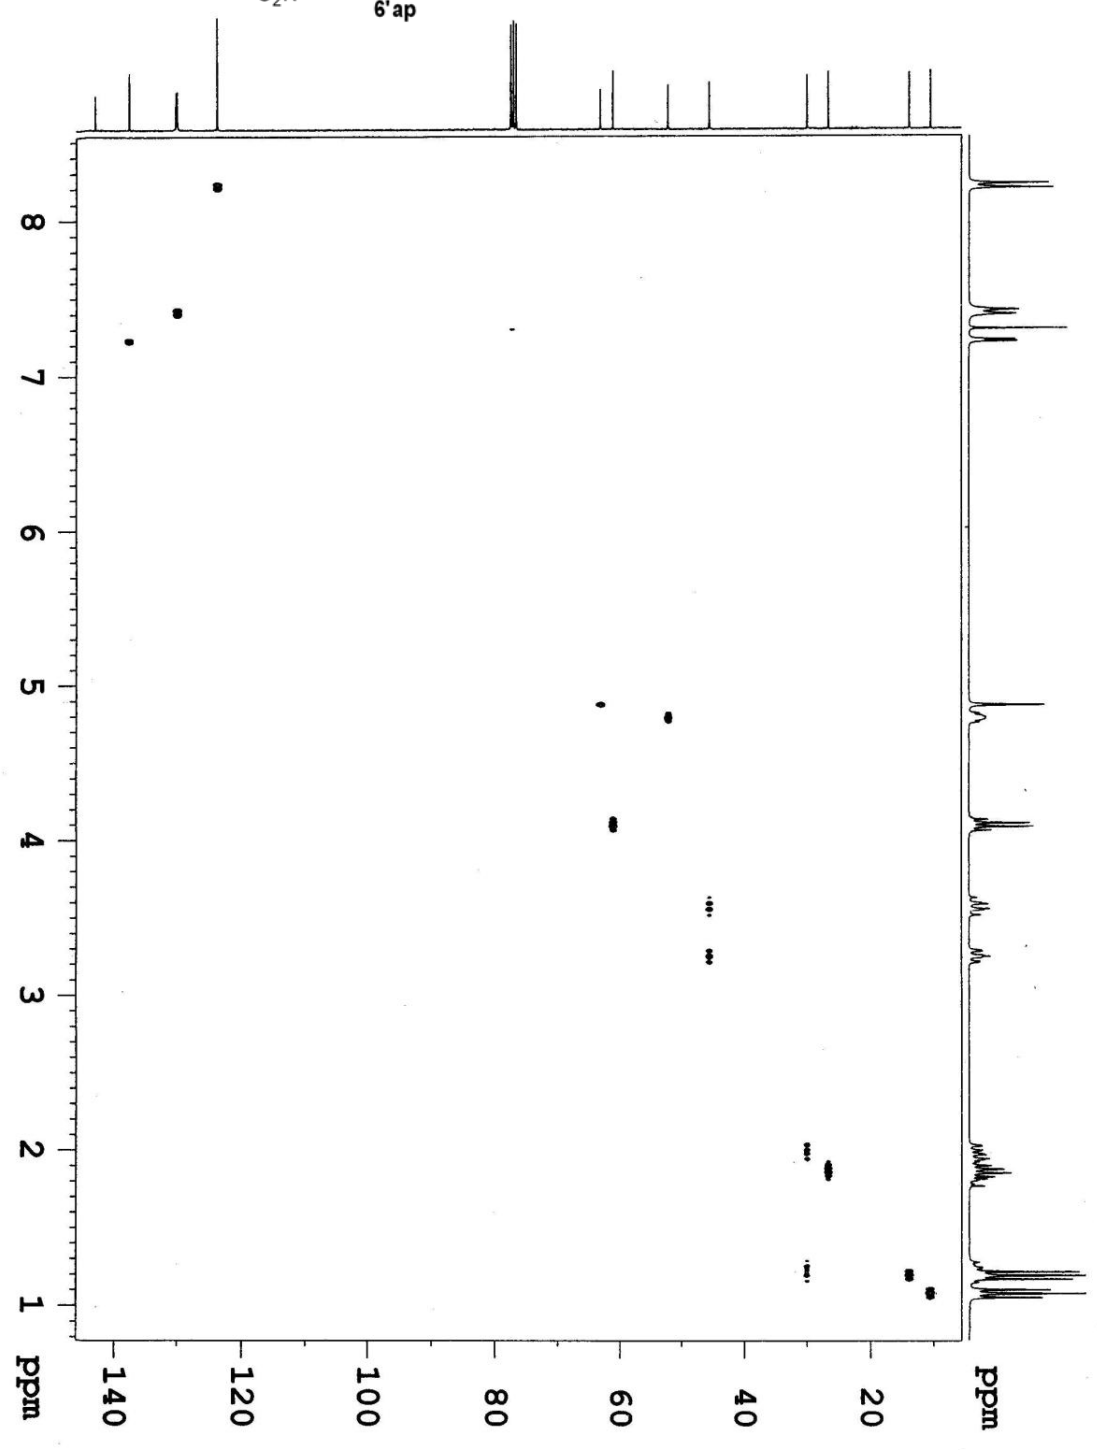

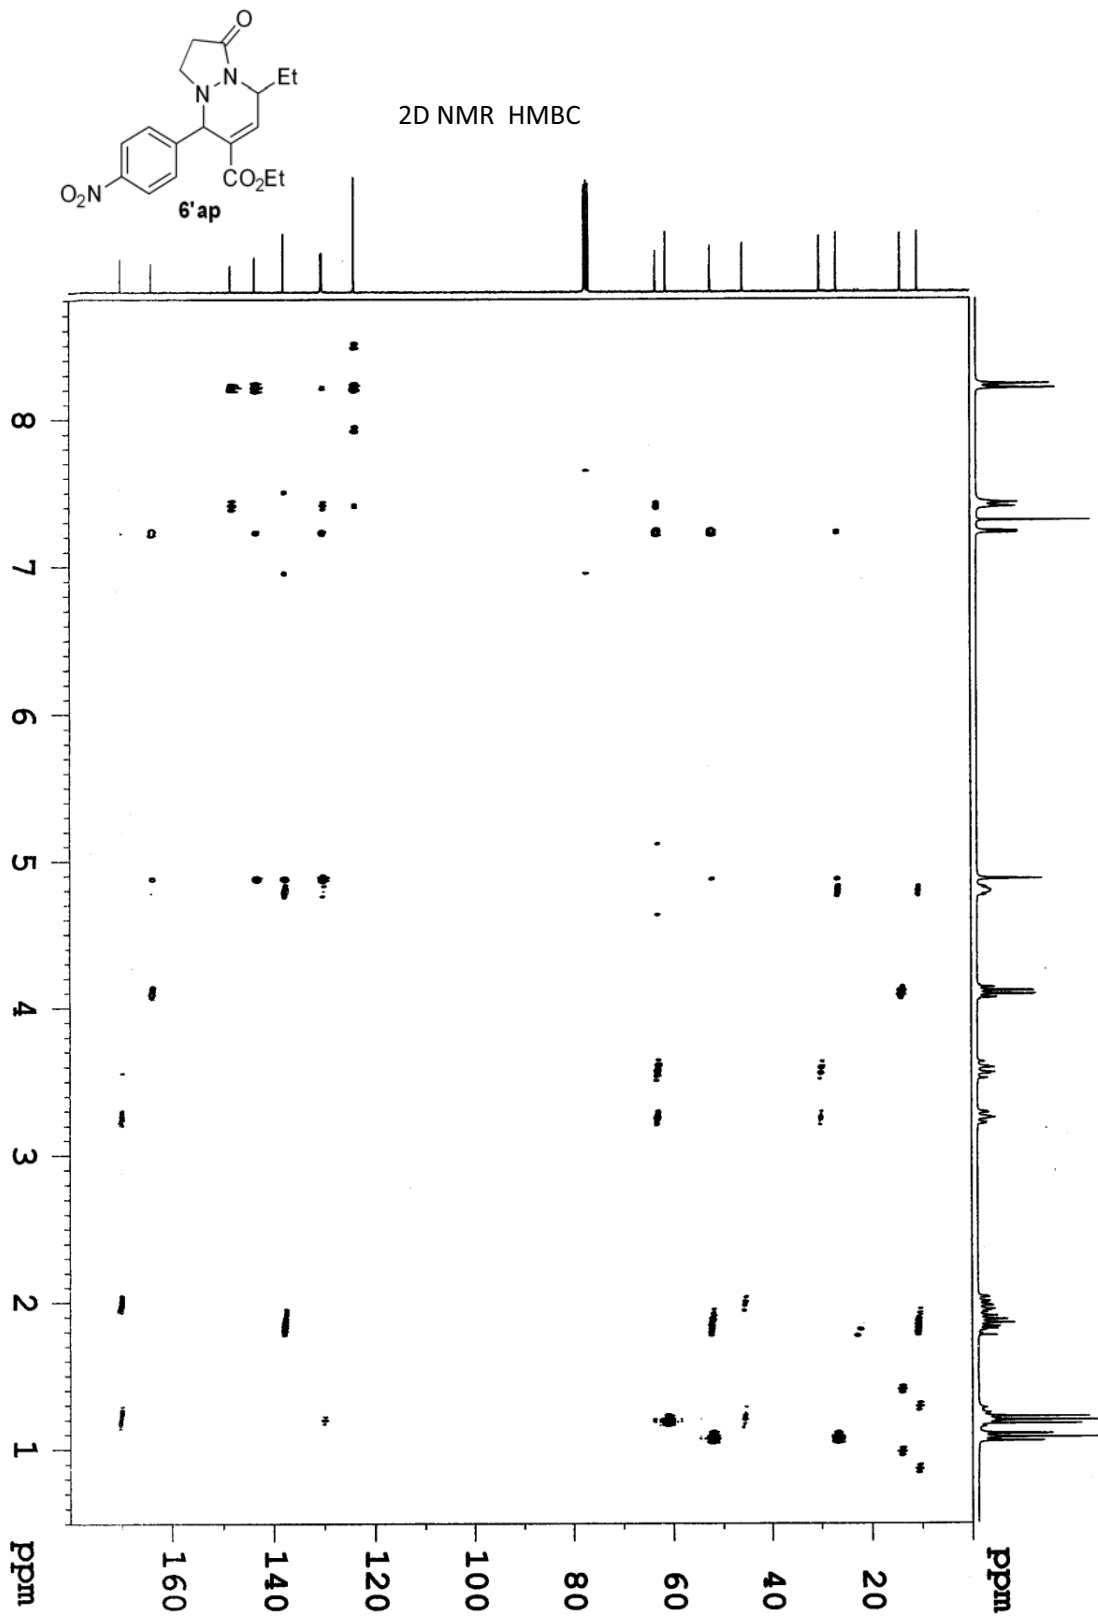

S101

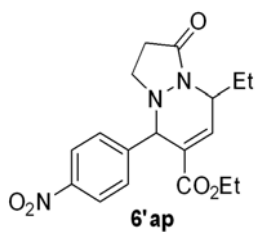

2D NMR NOSEY

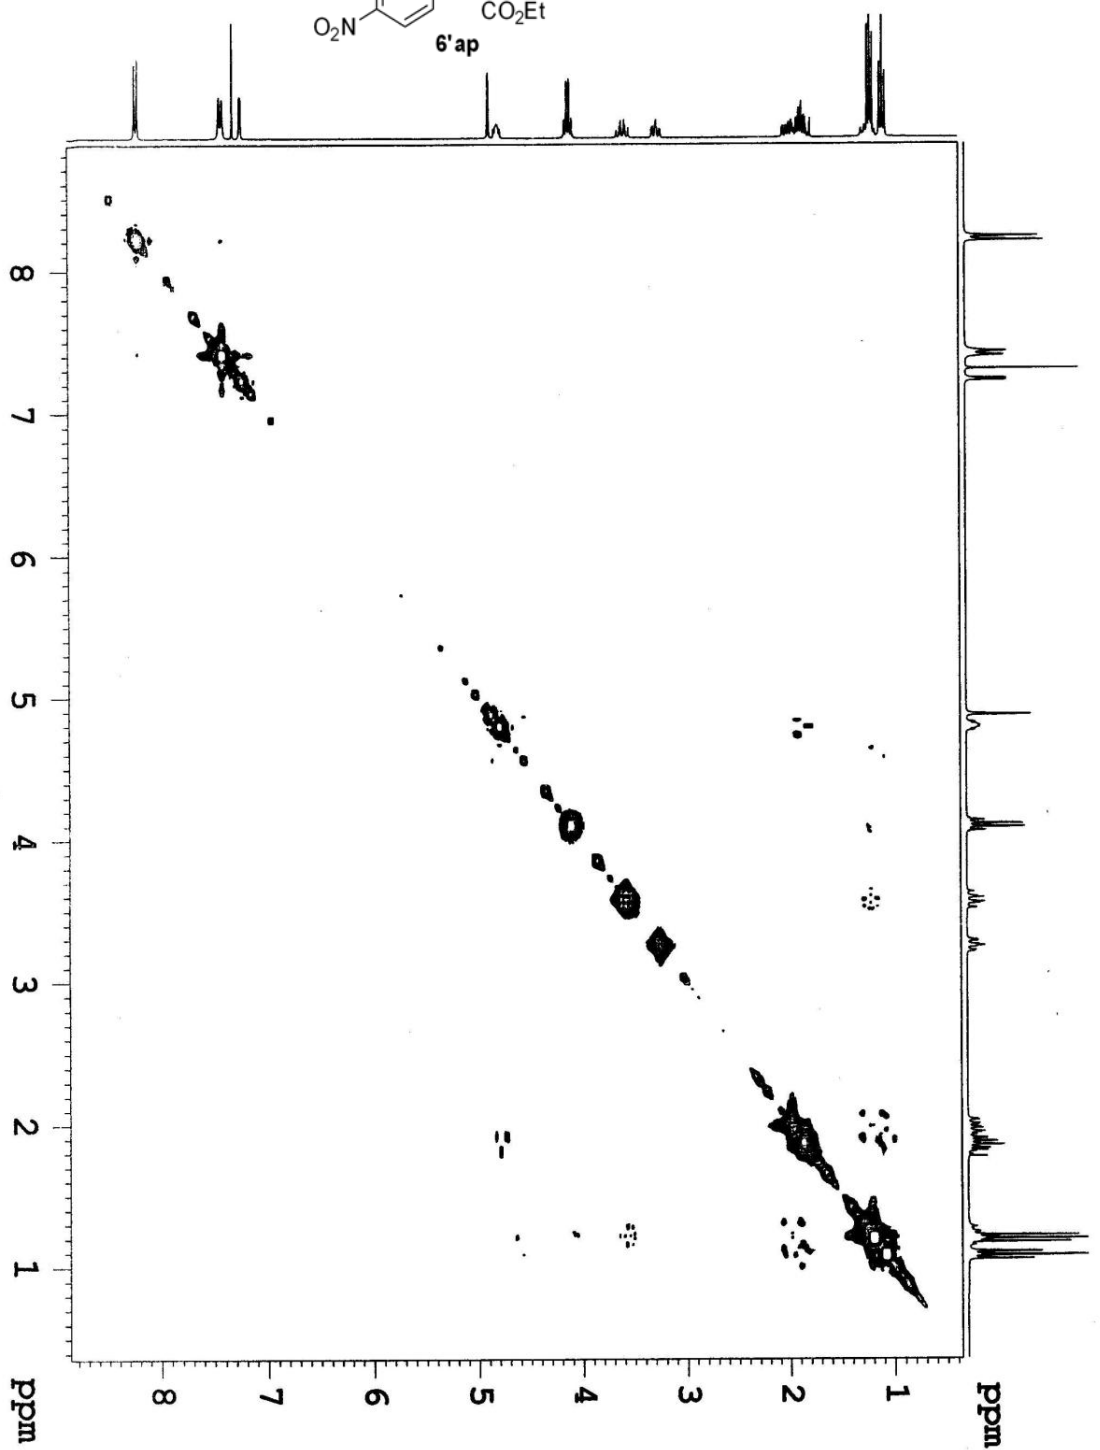

S102

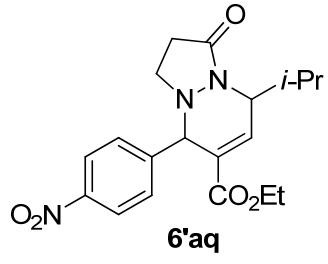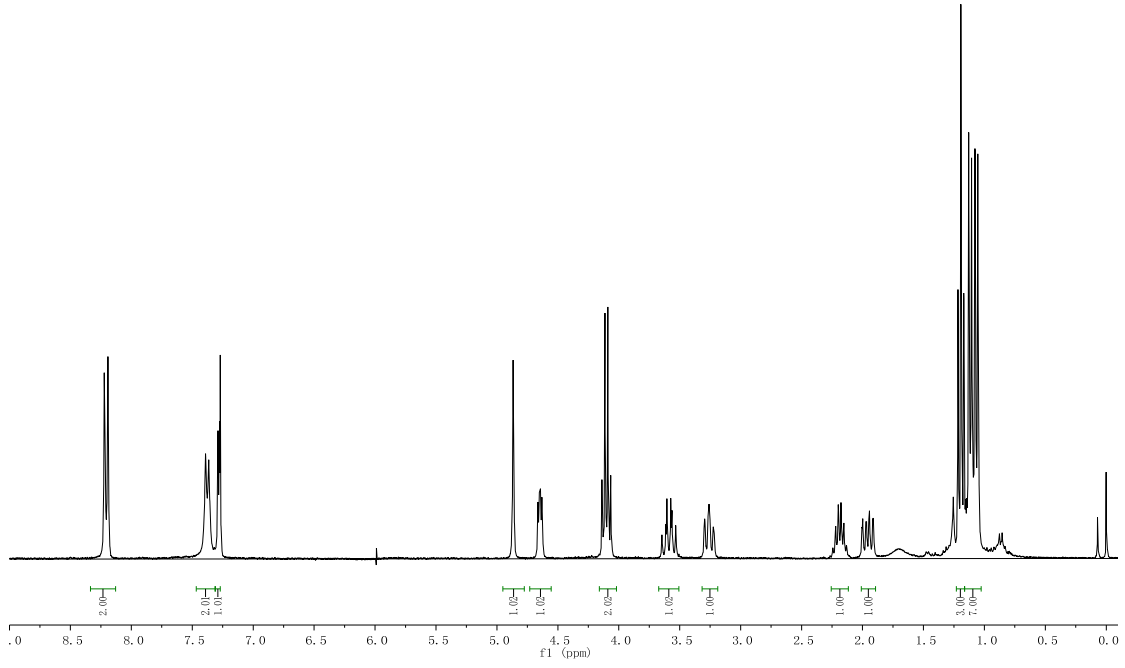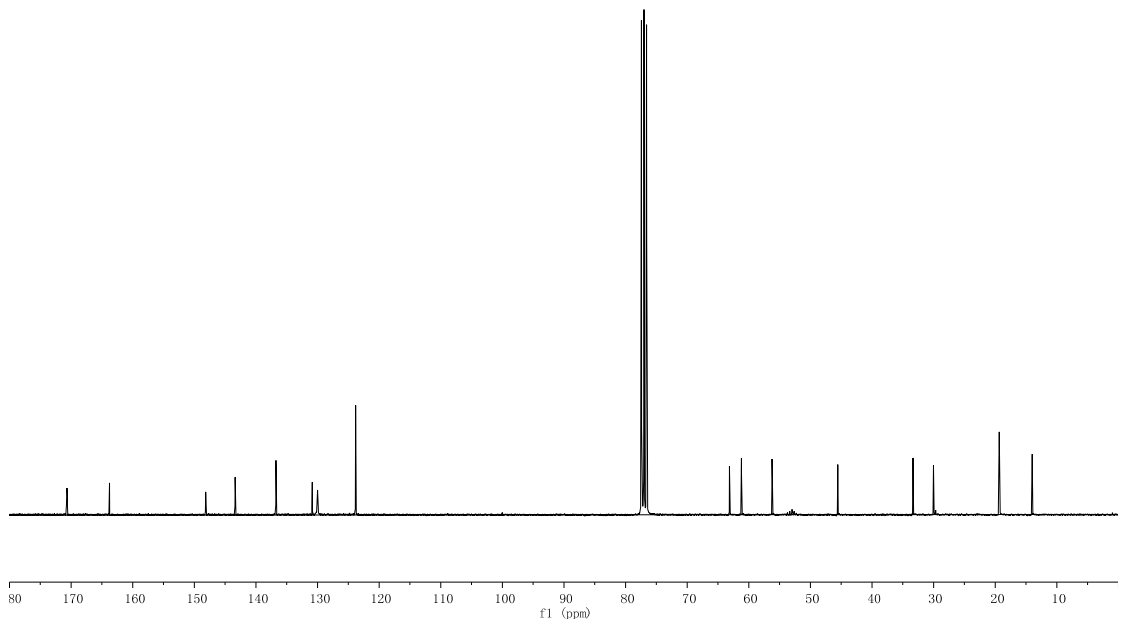

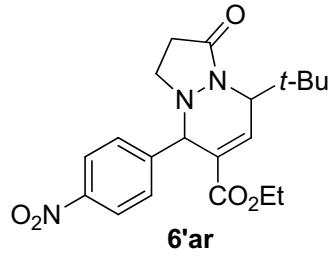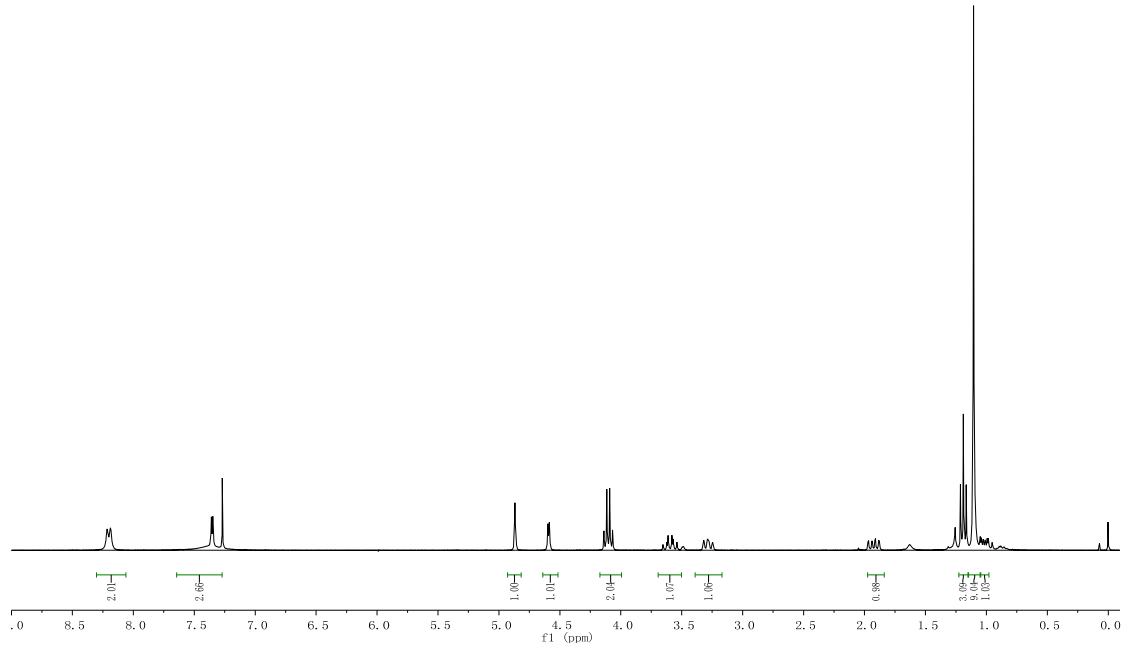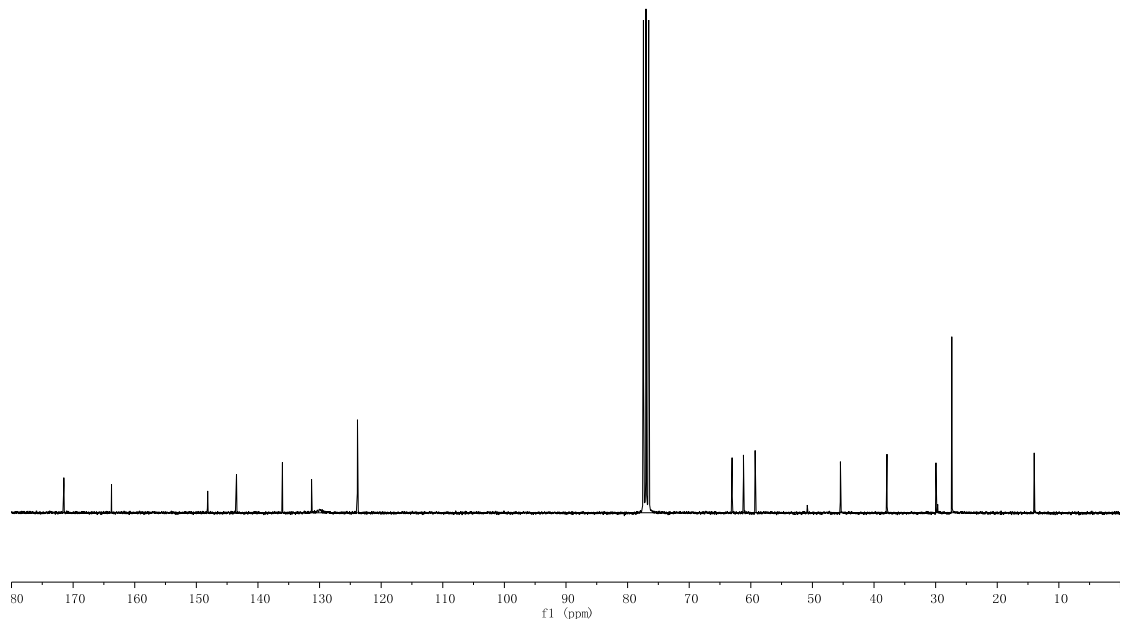

S104



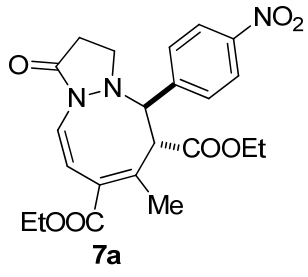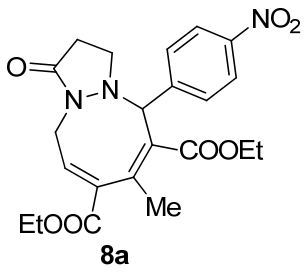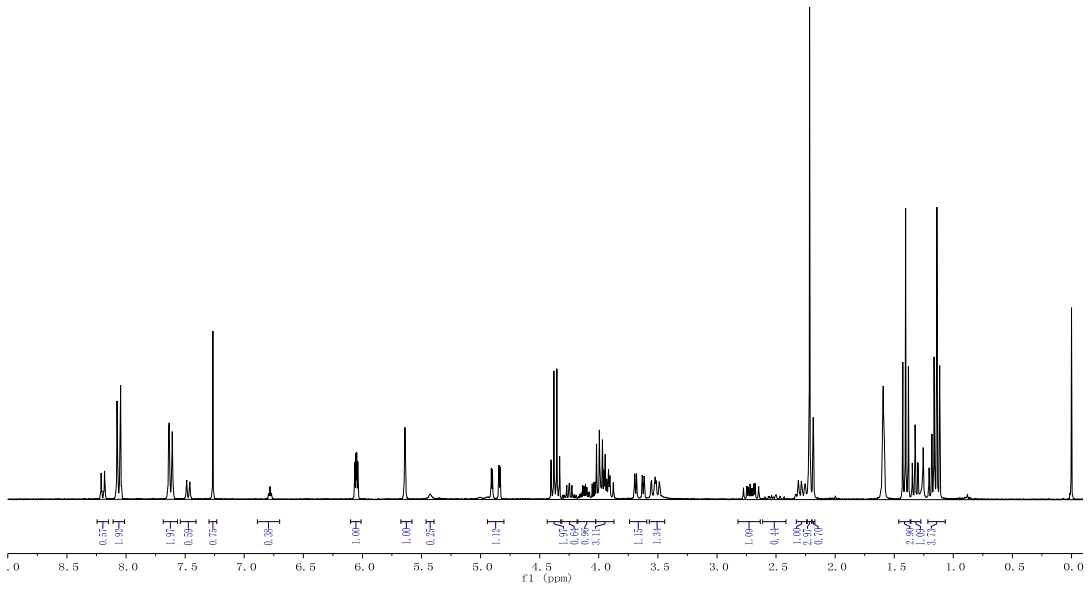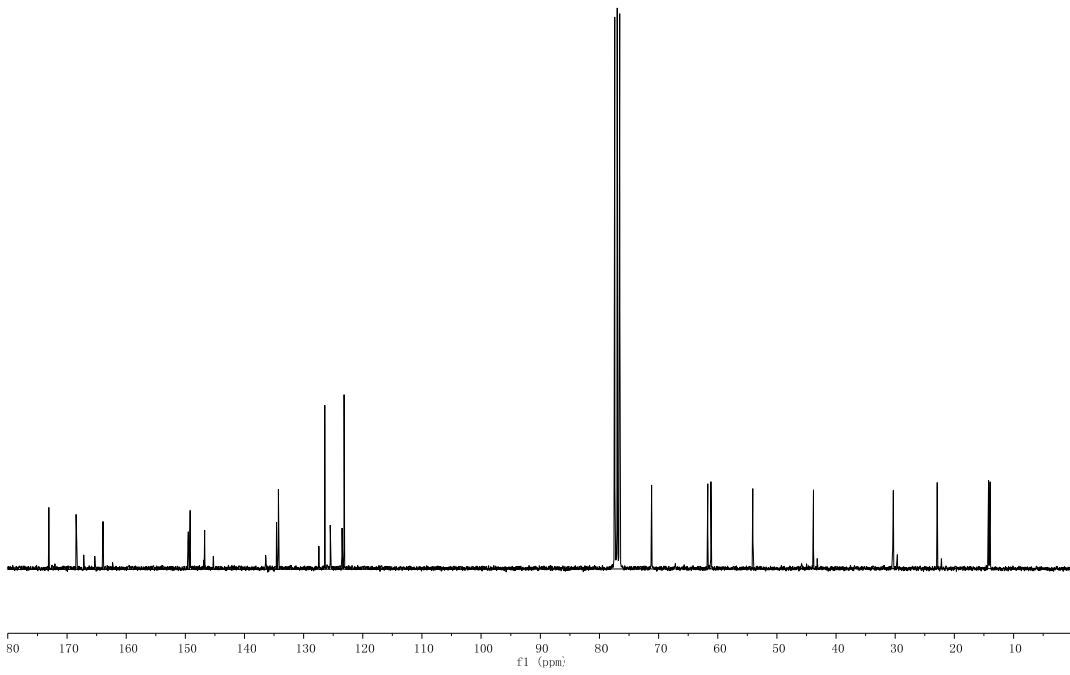

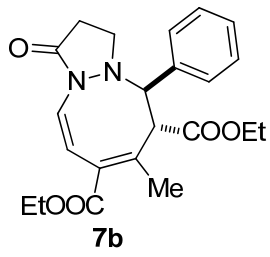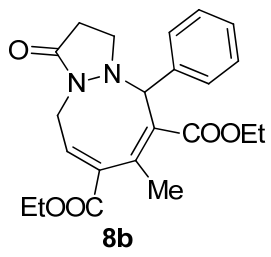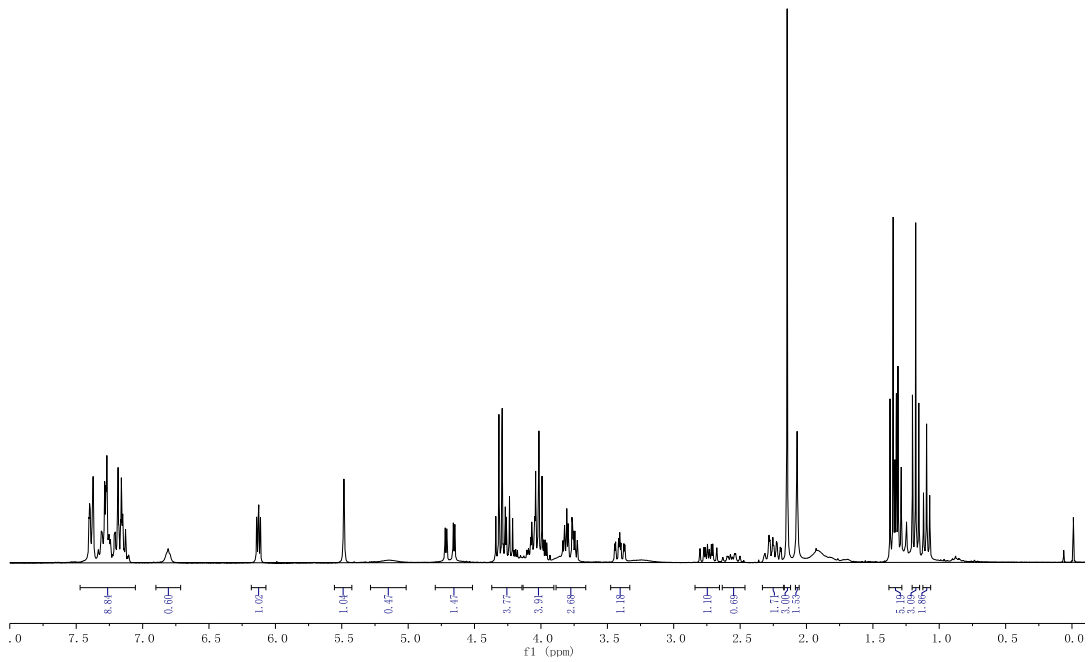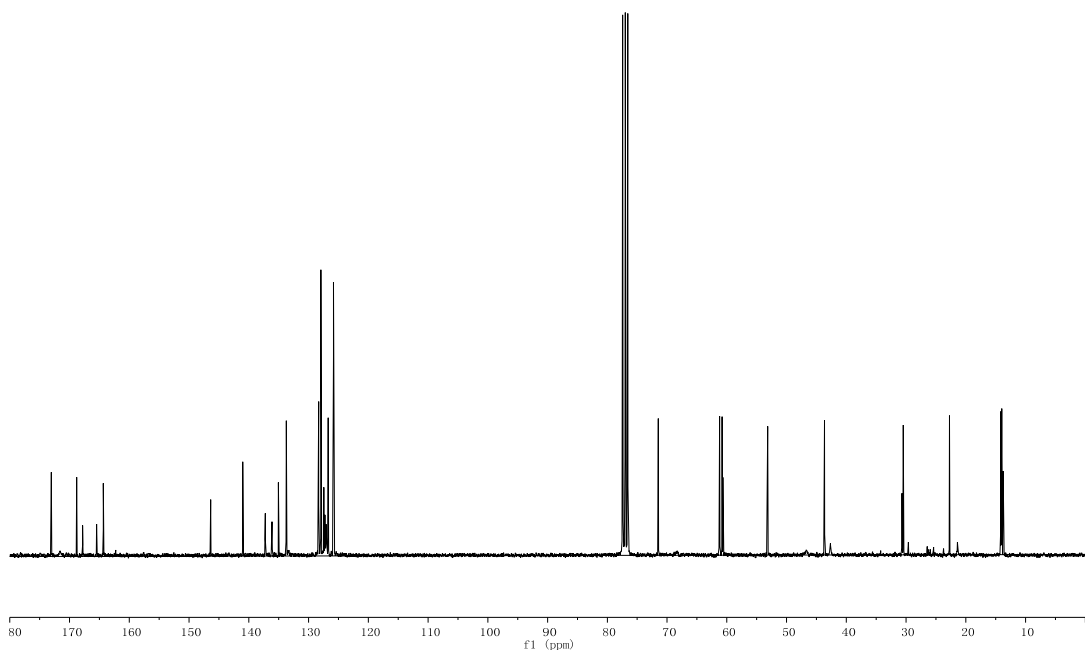

S106

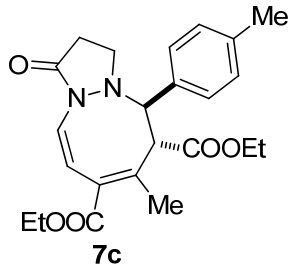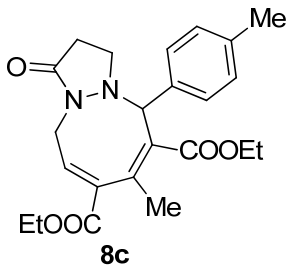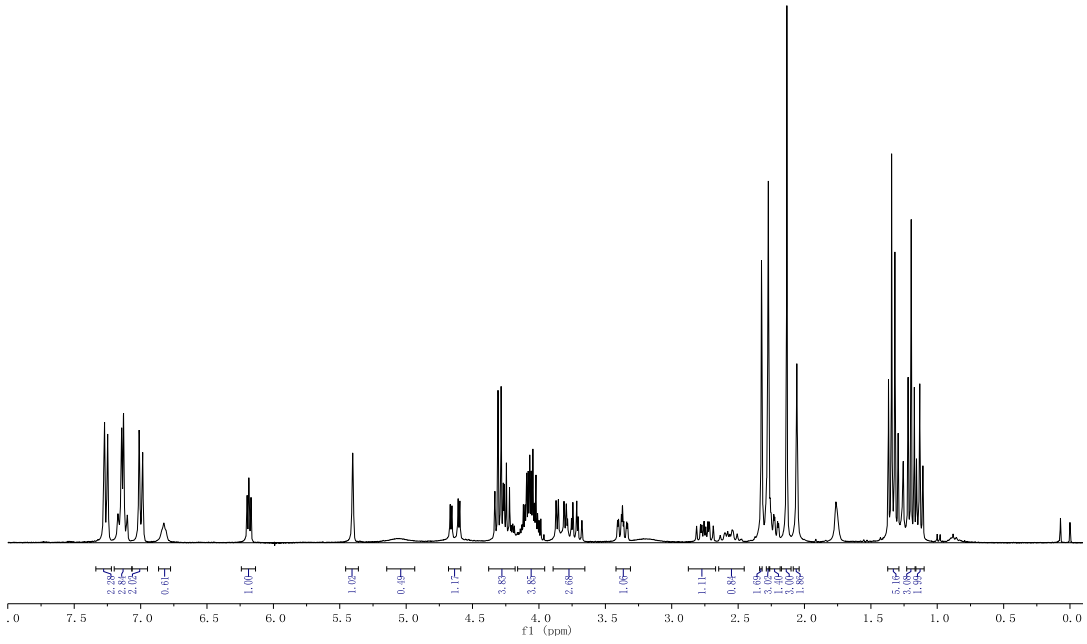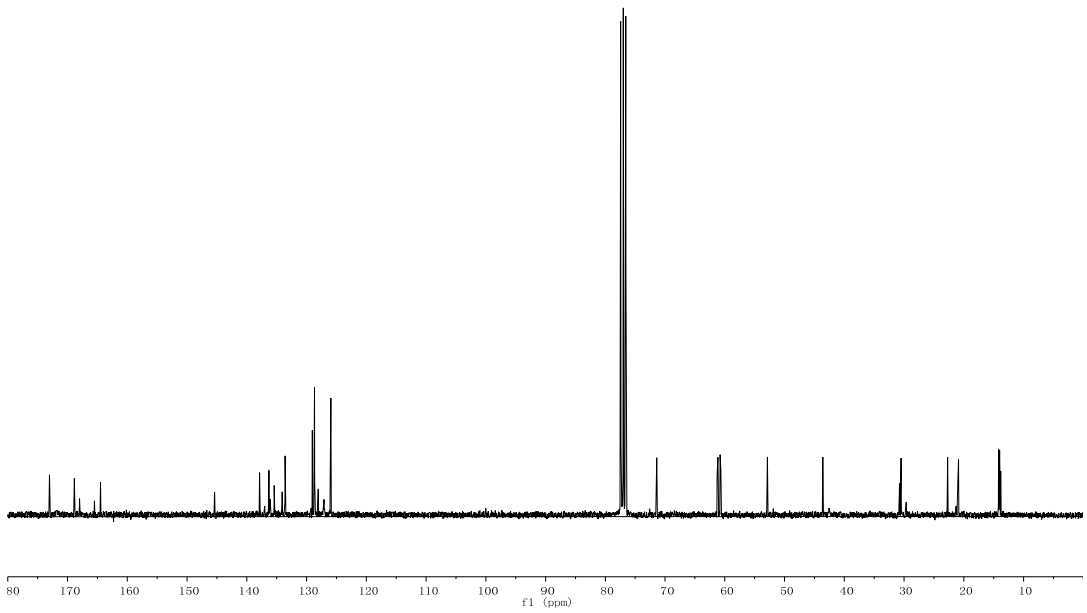

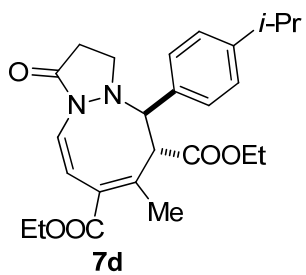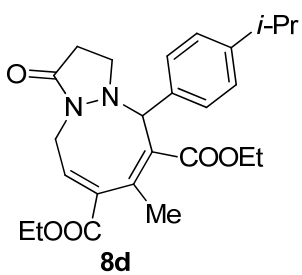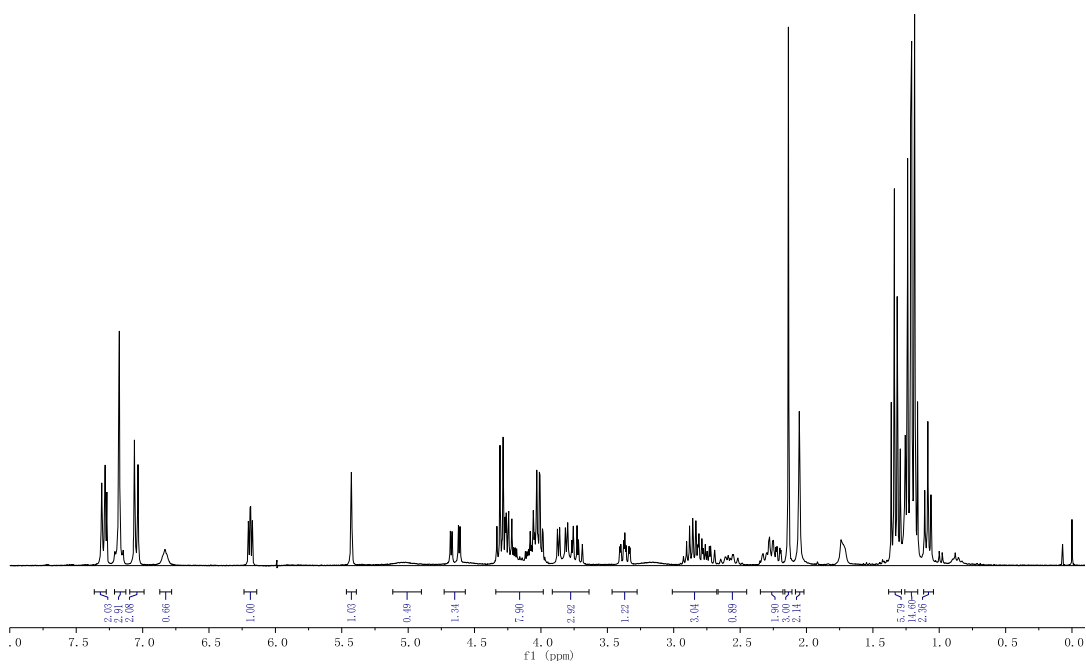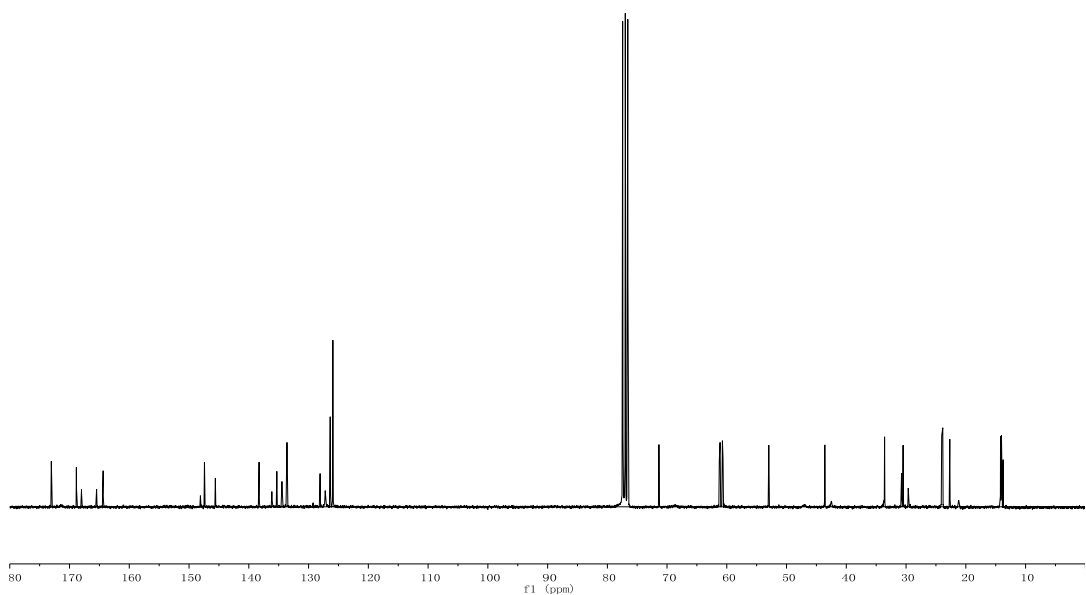

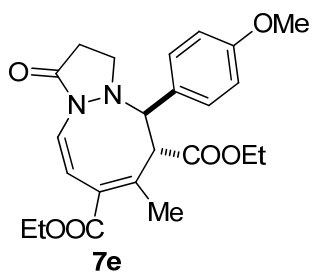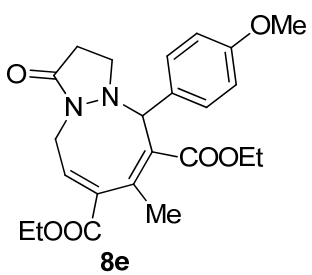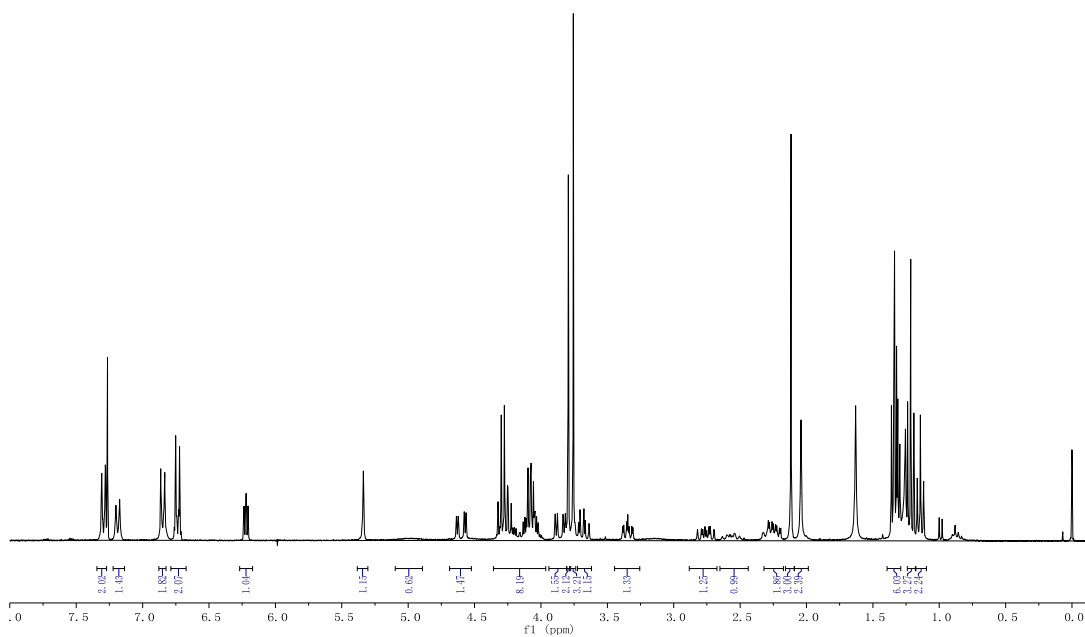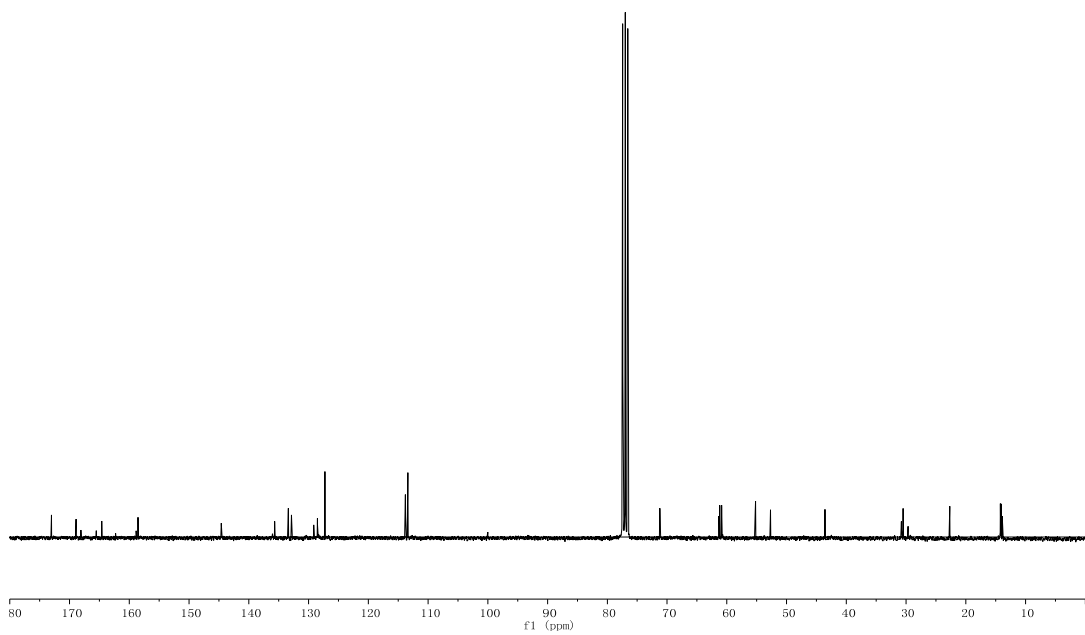

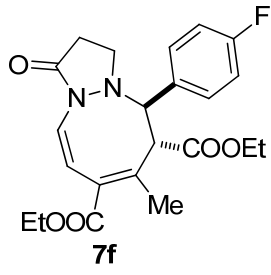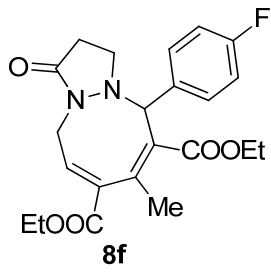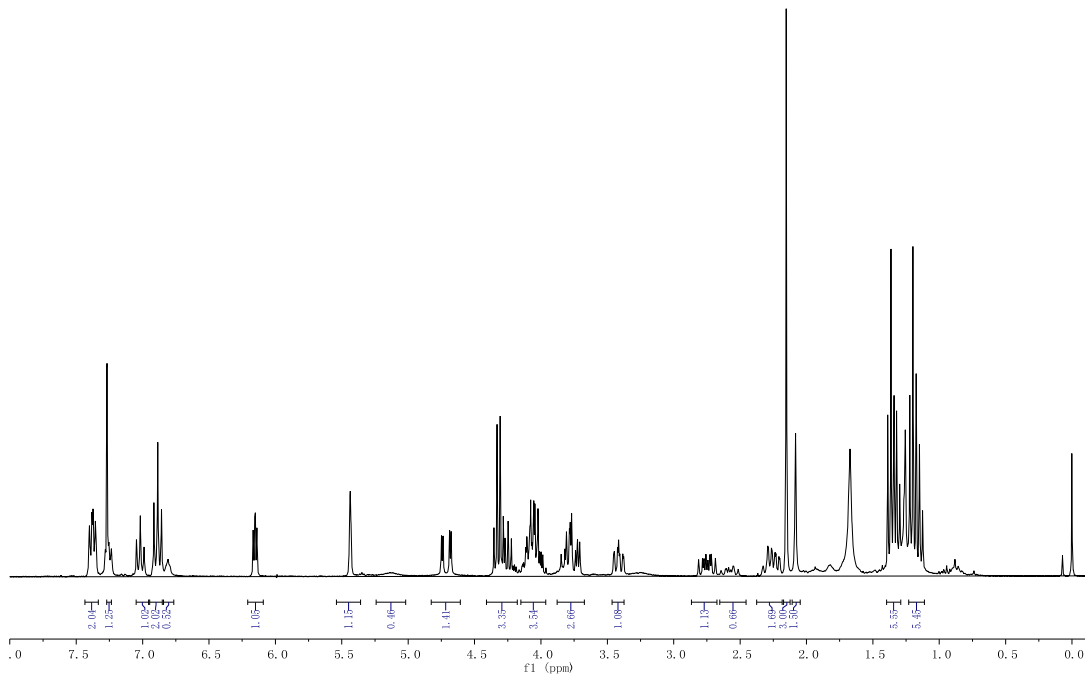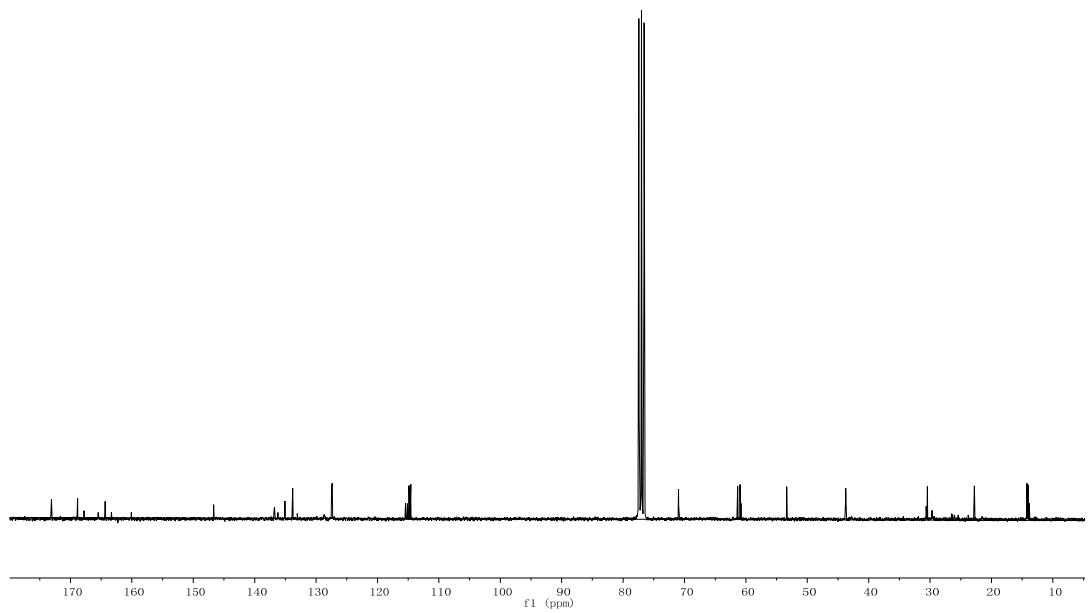

S110

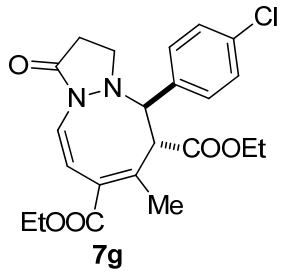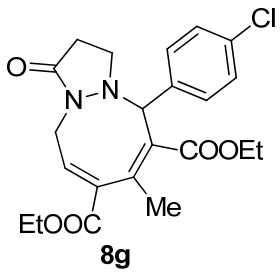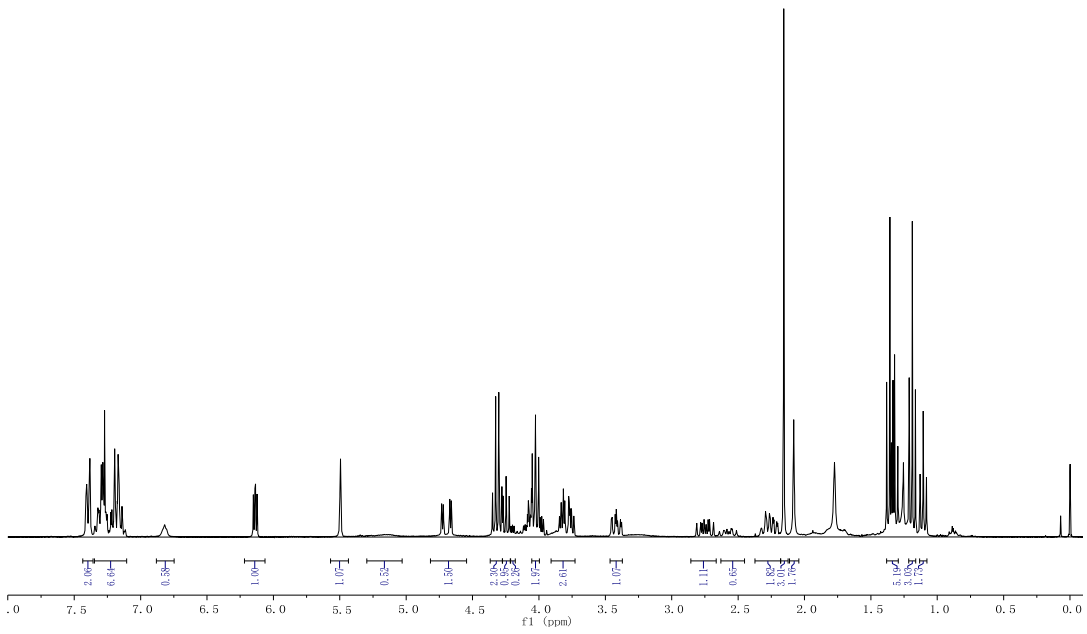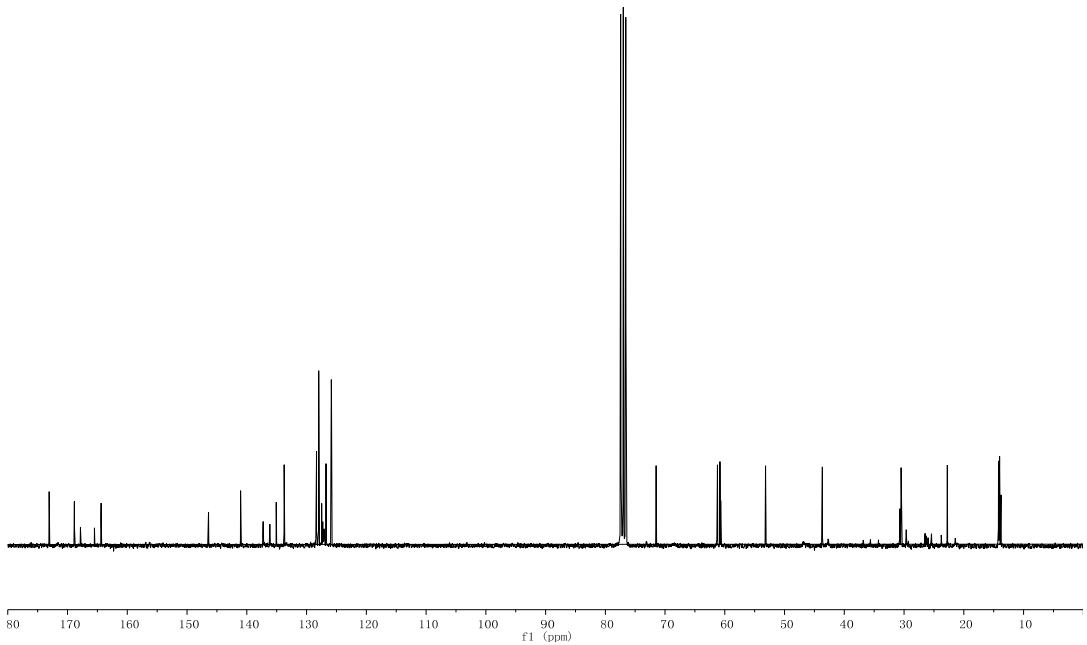

S111

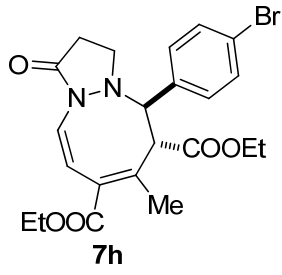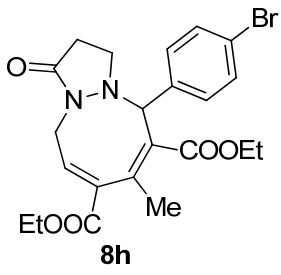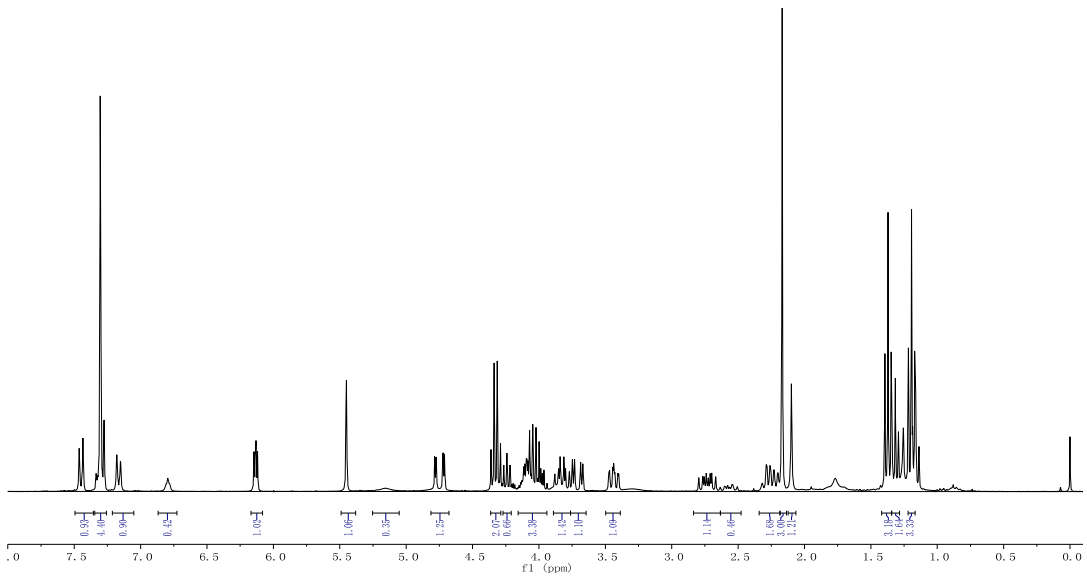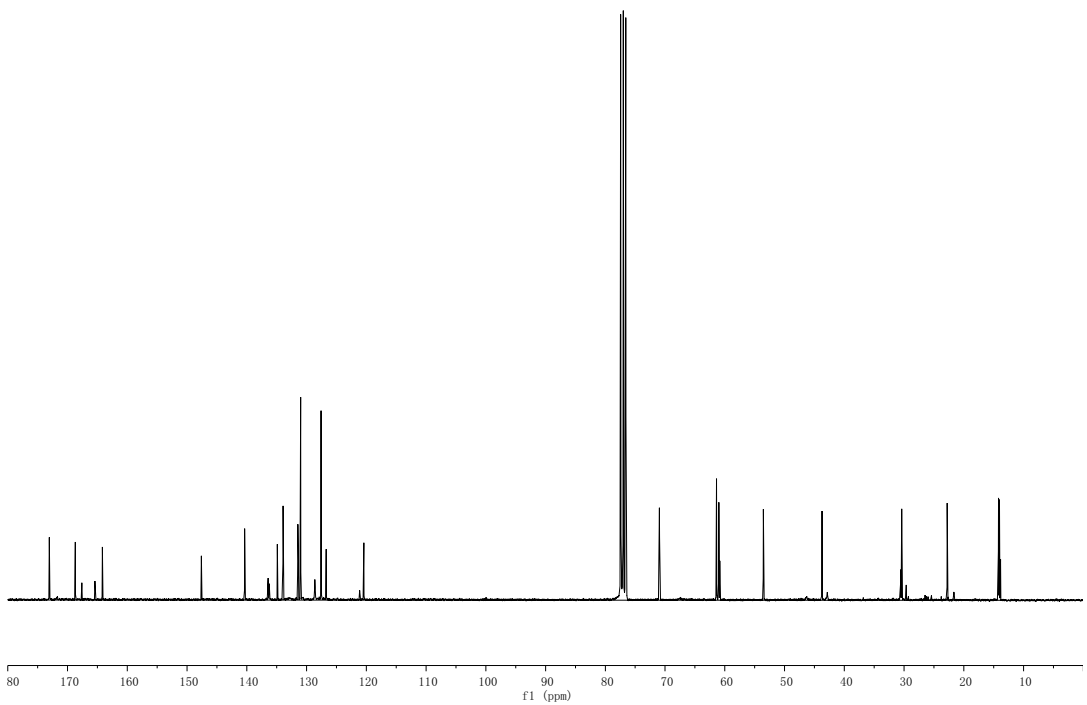

S112



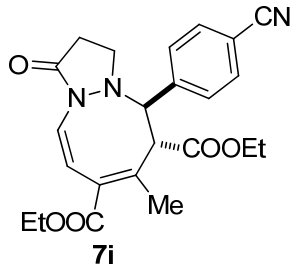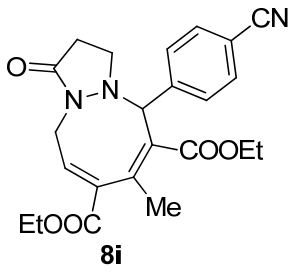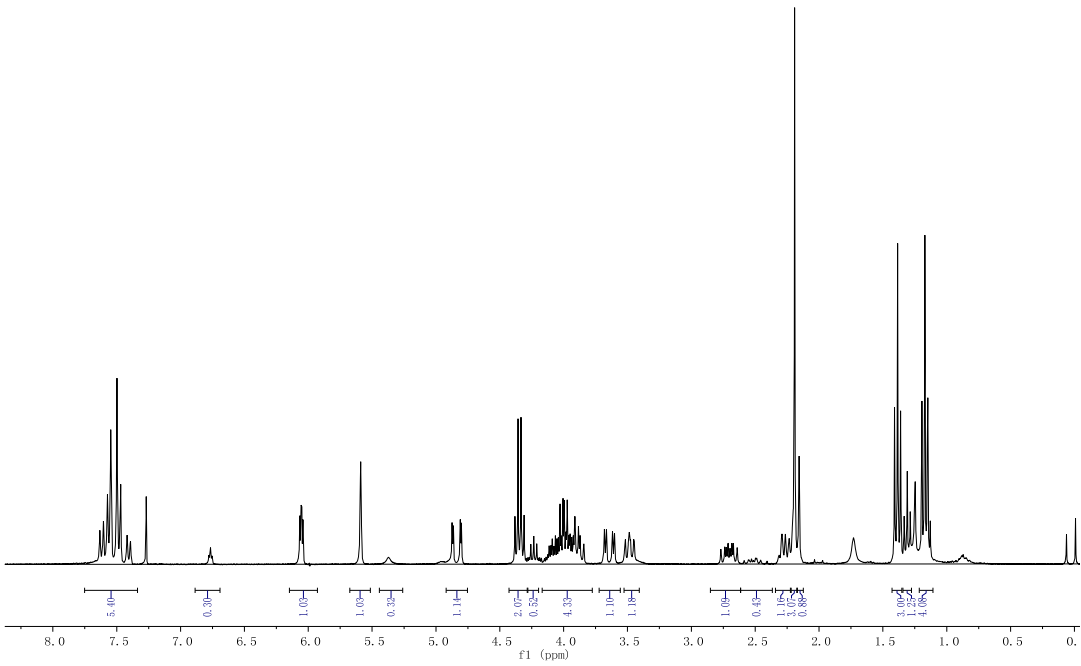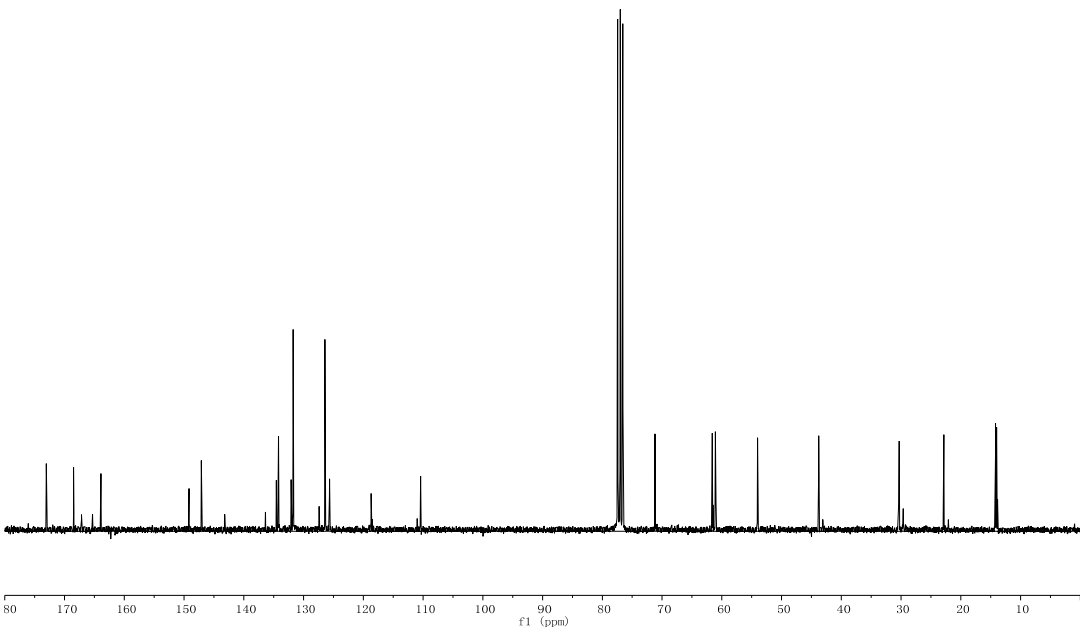

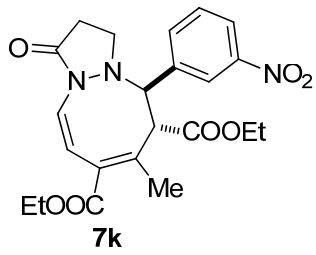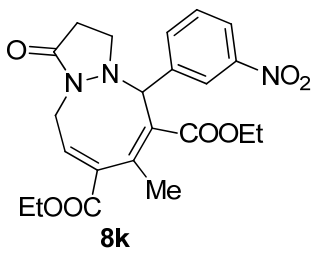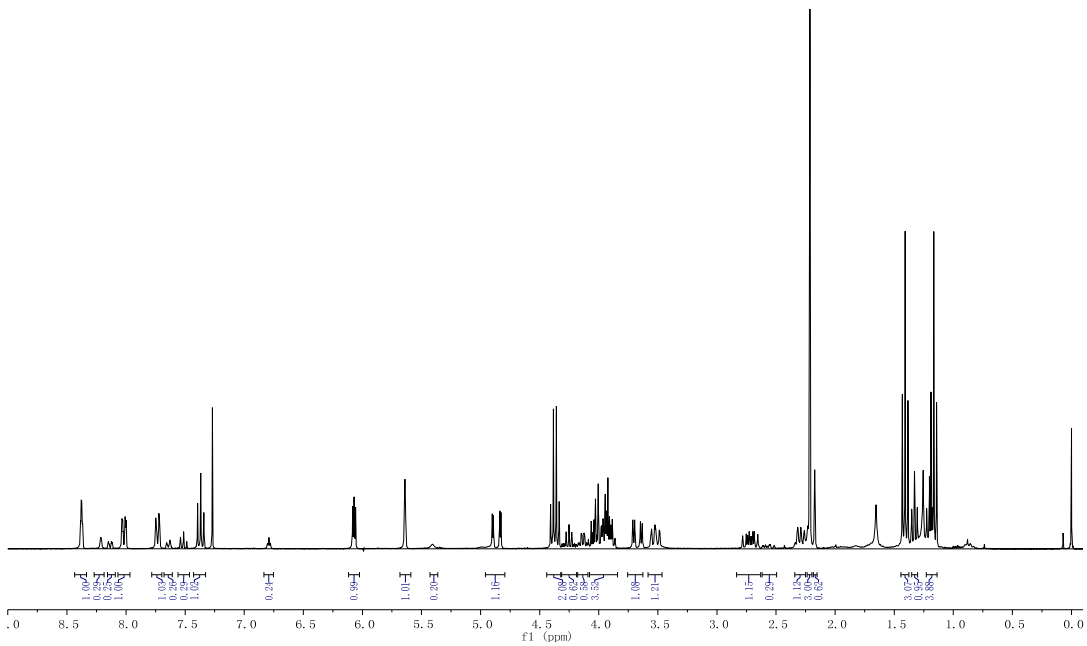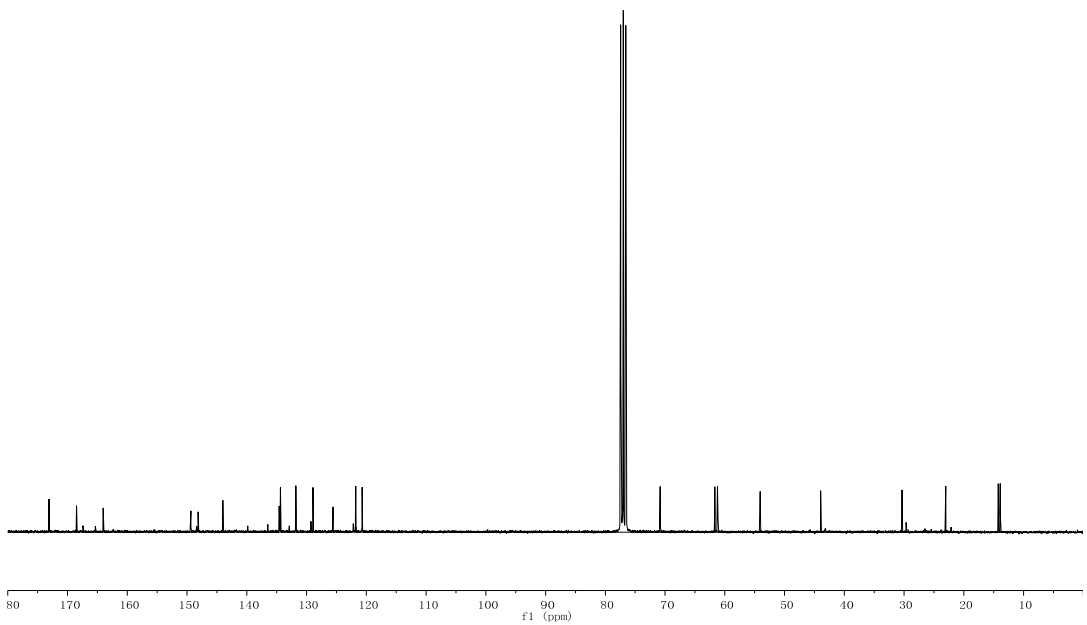

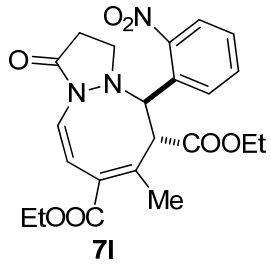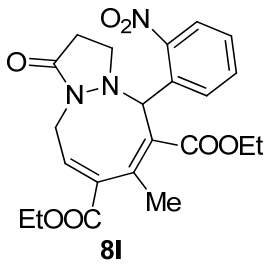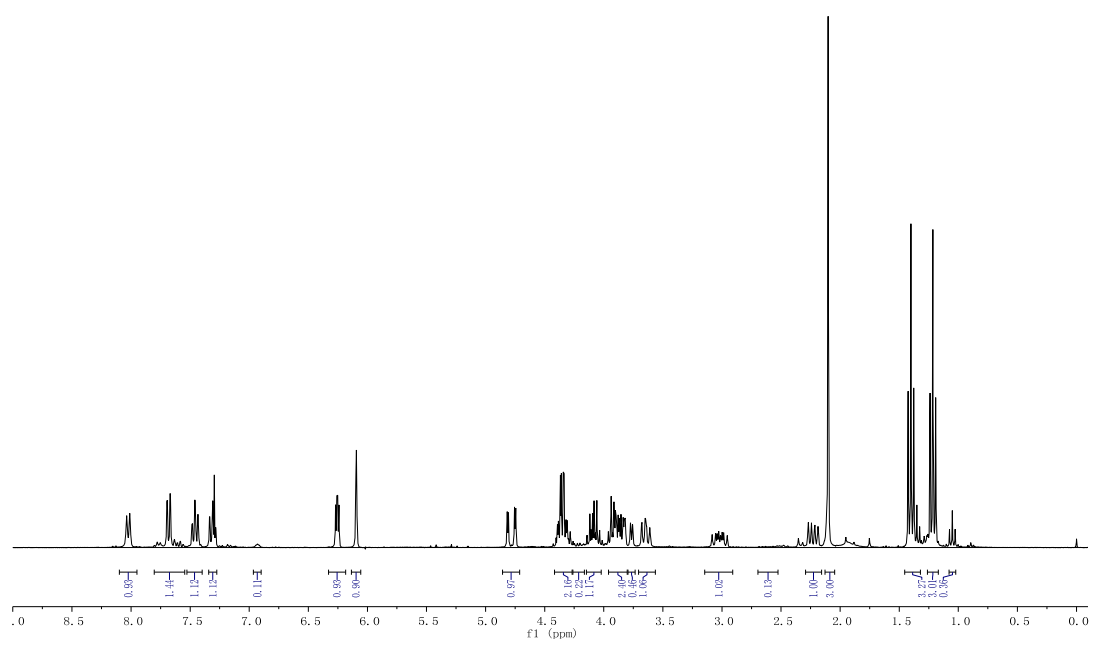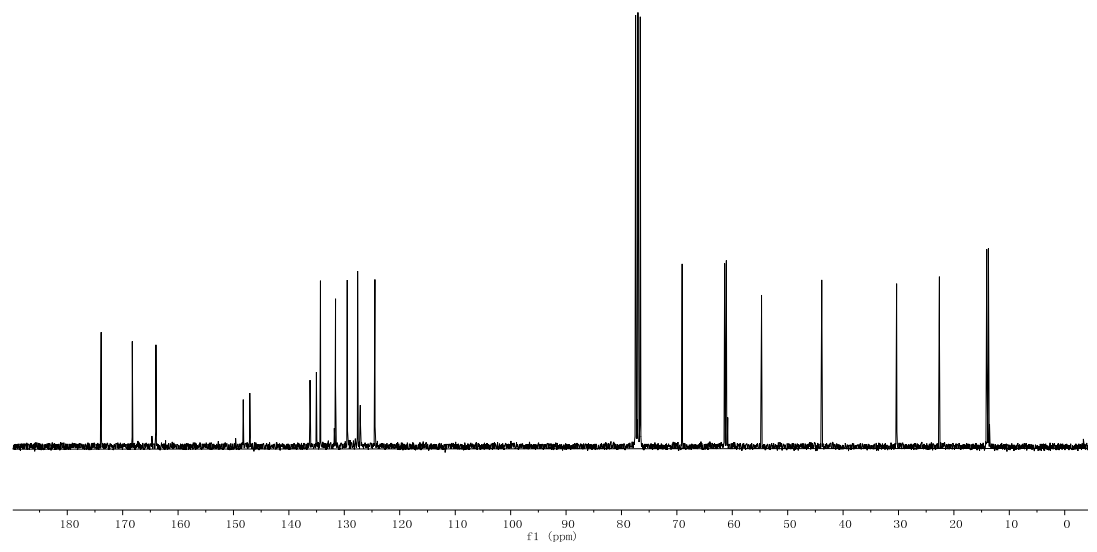

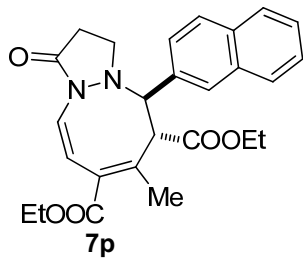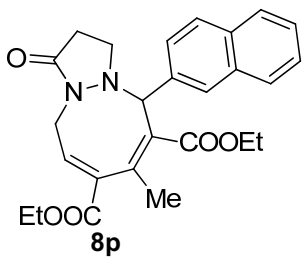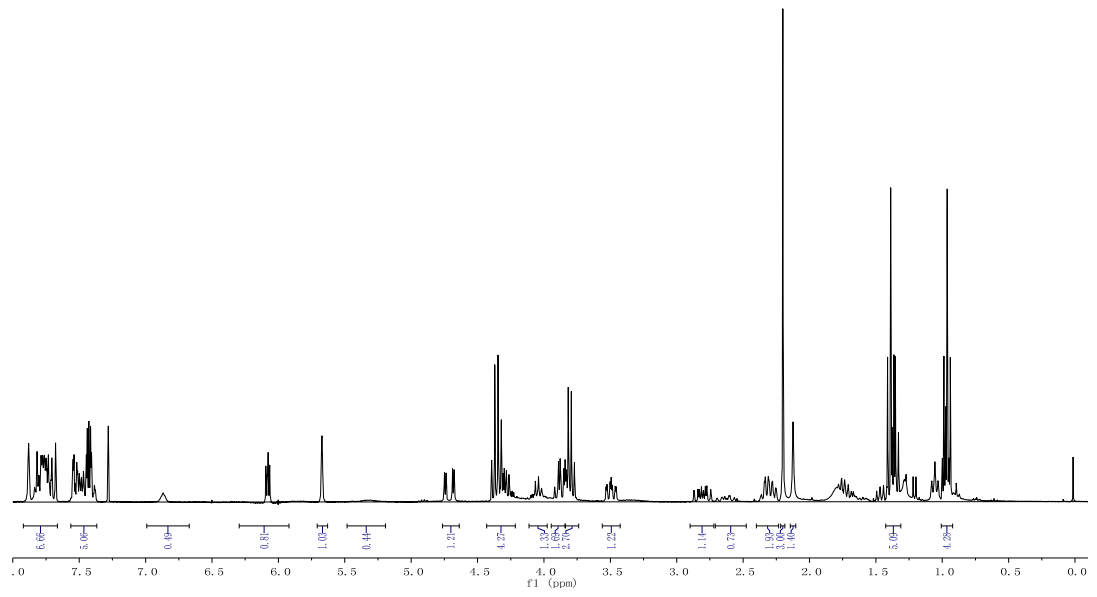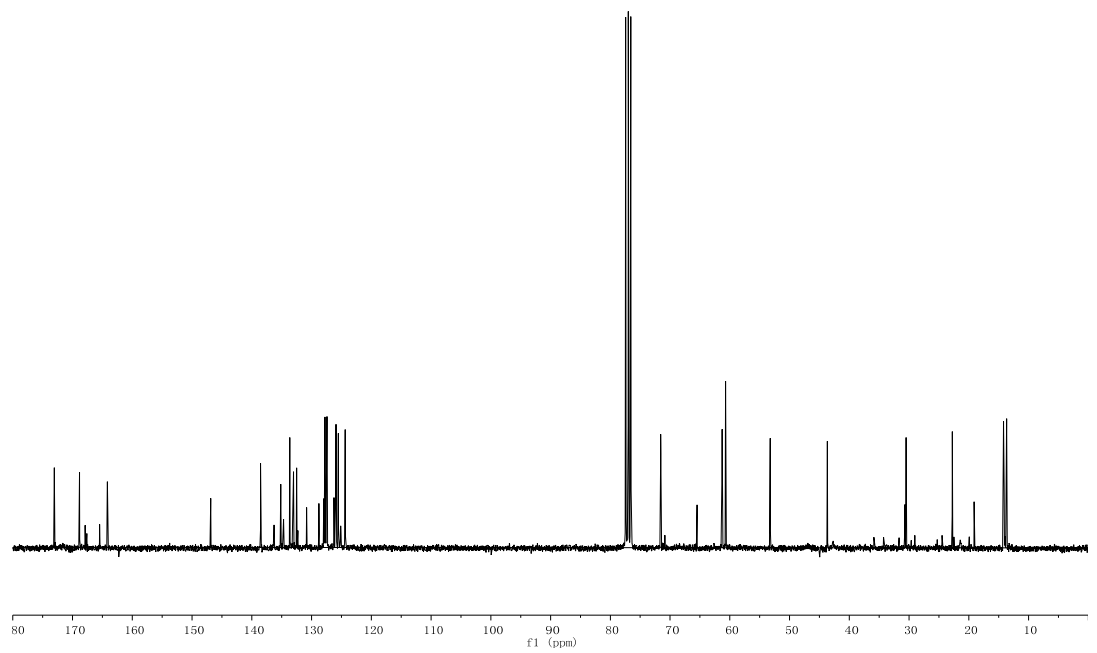

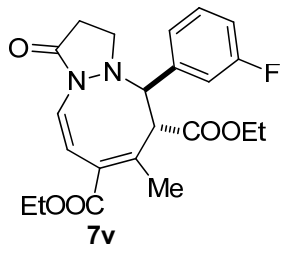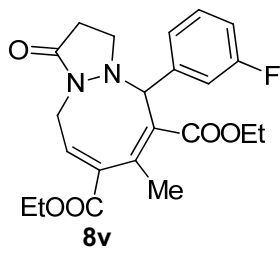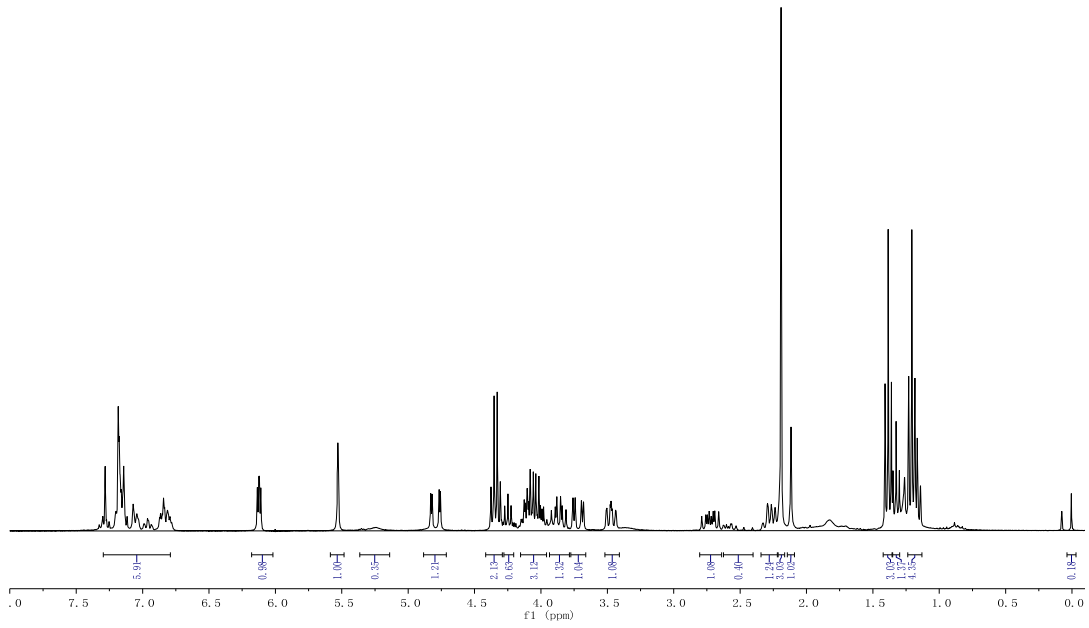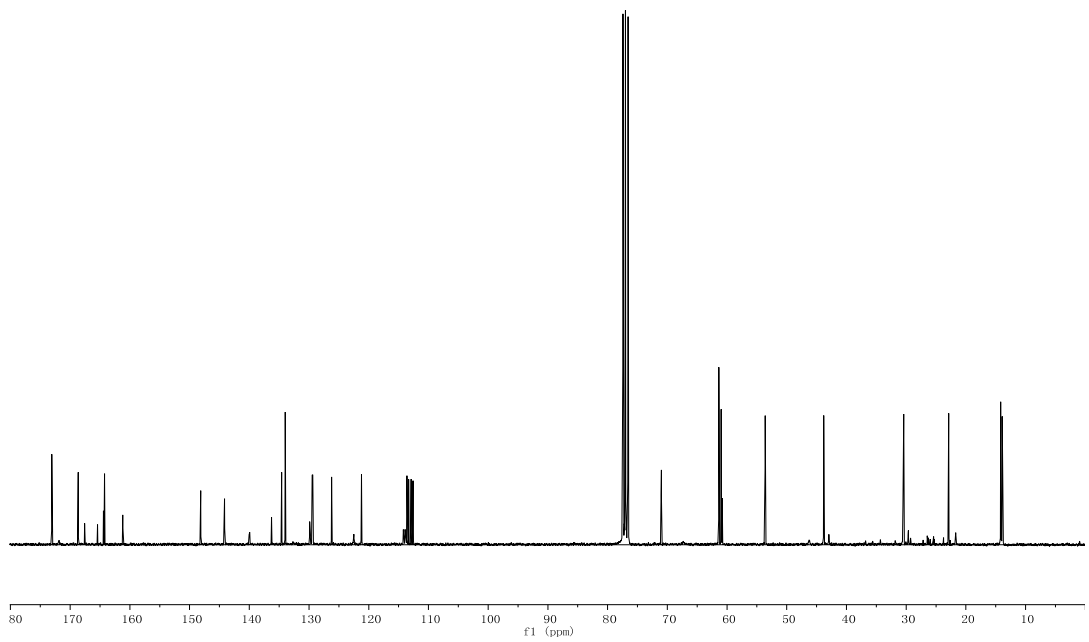

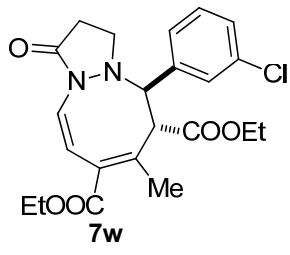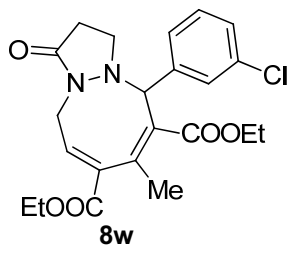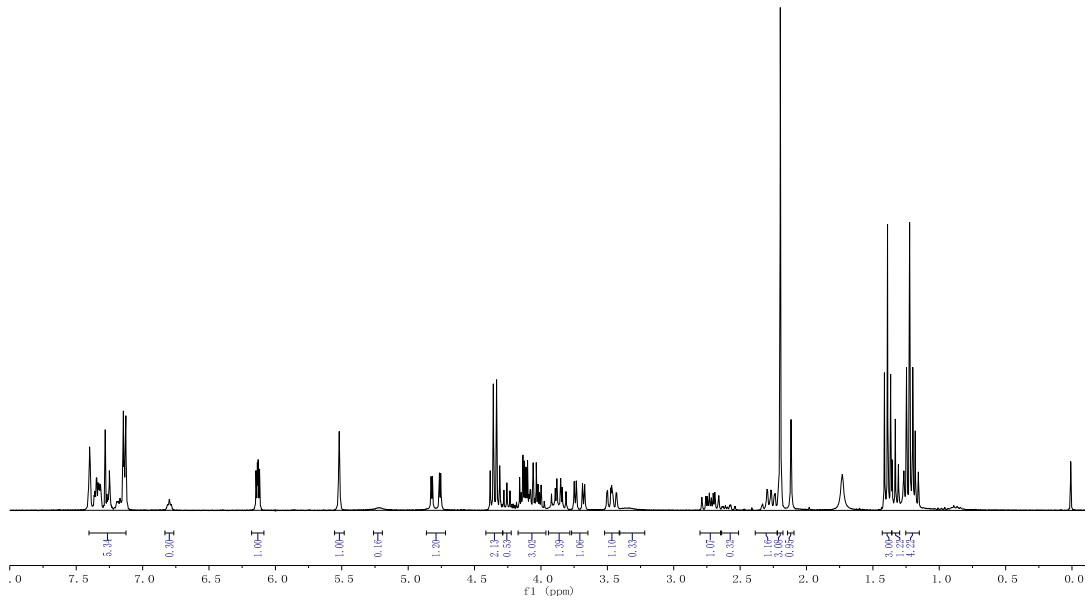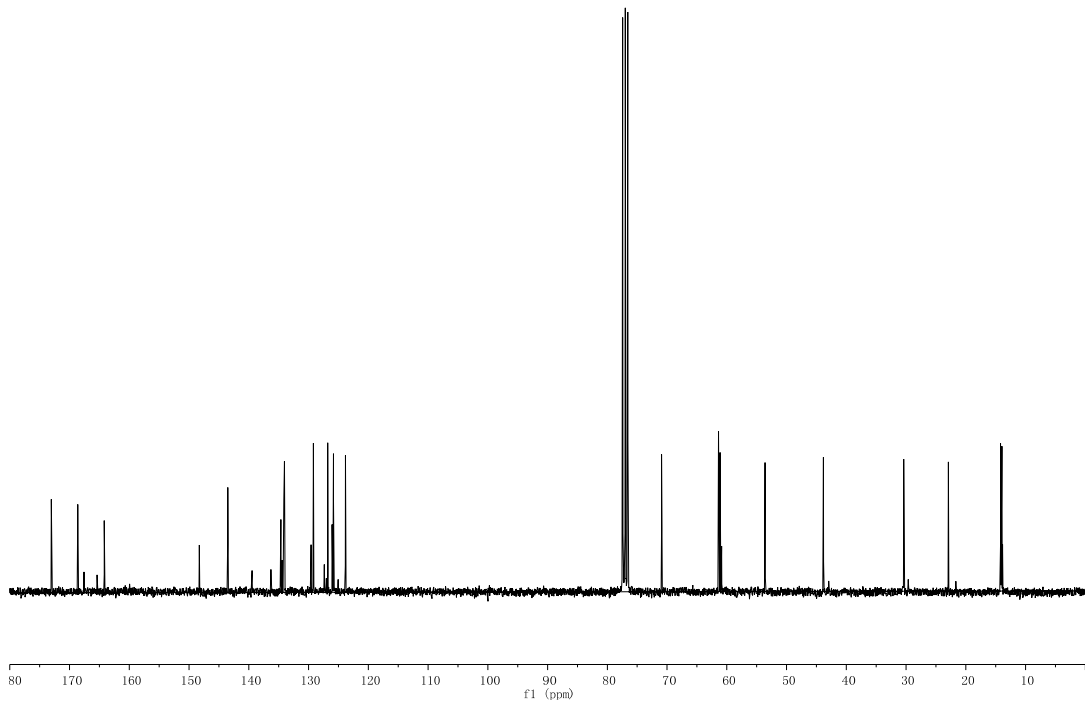

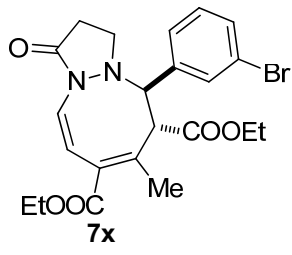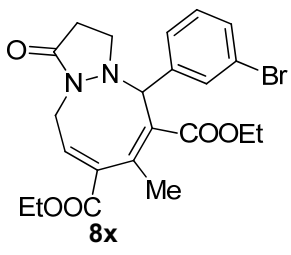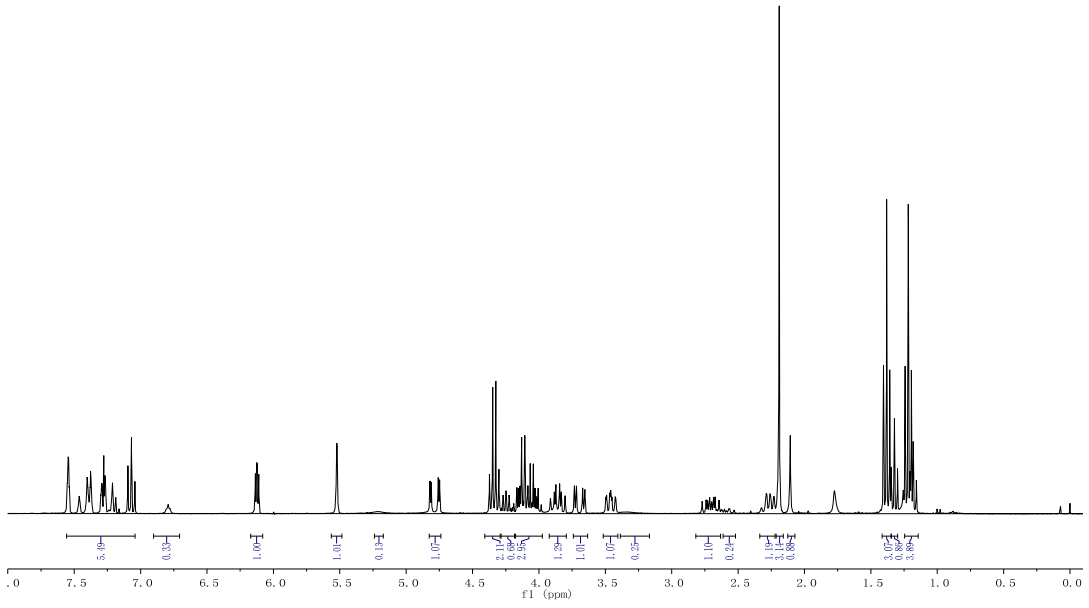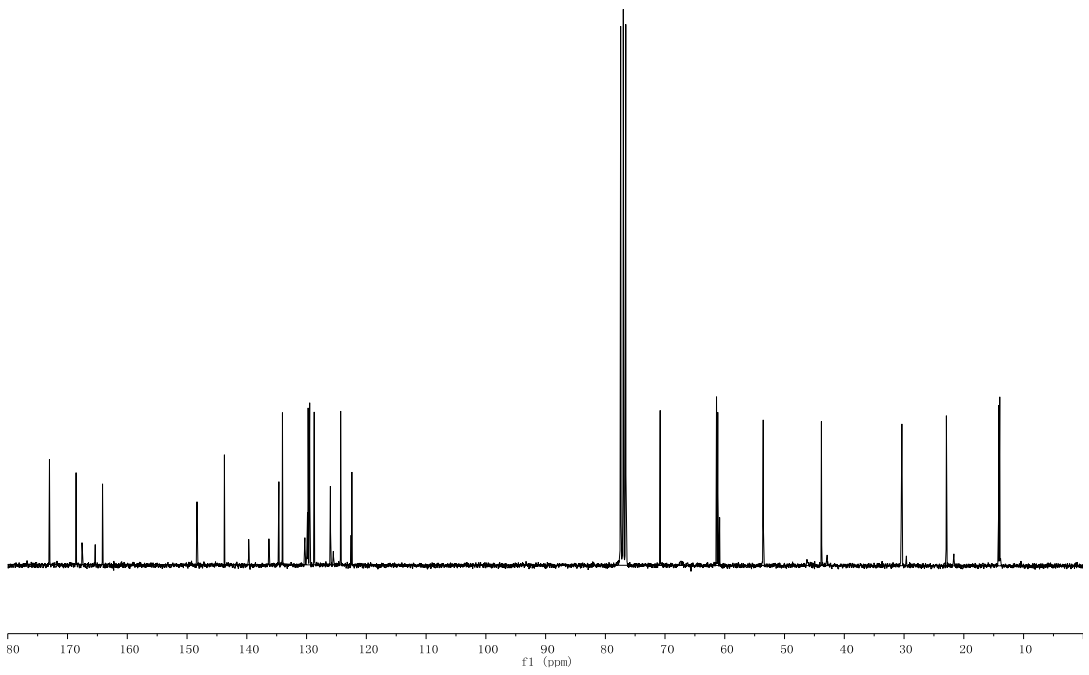

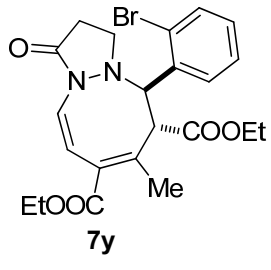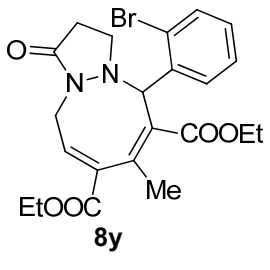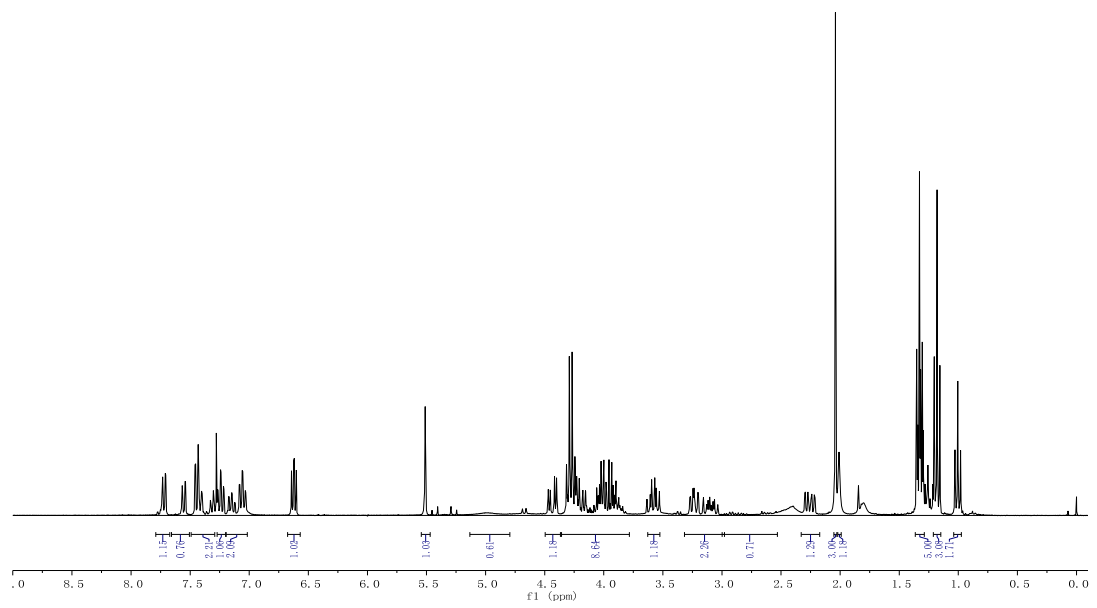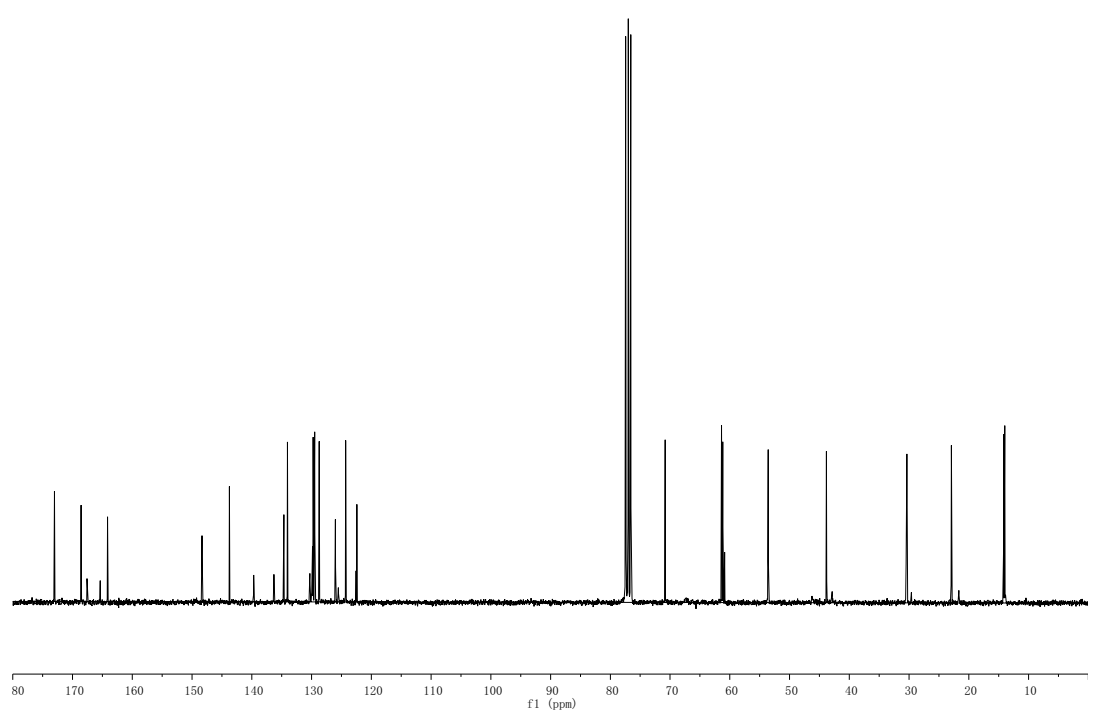



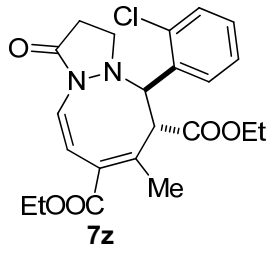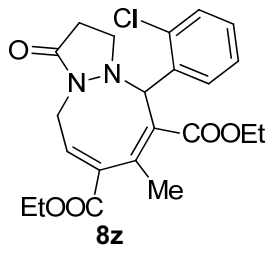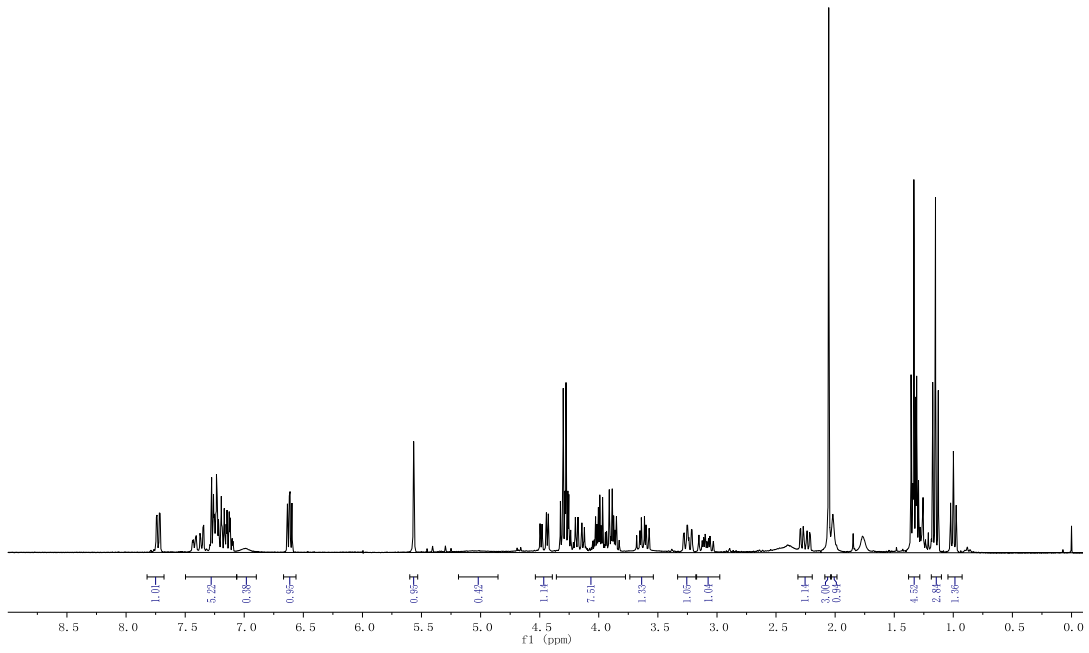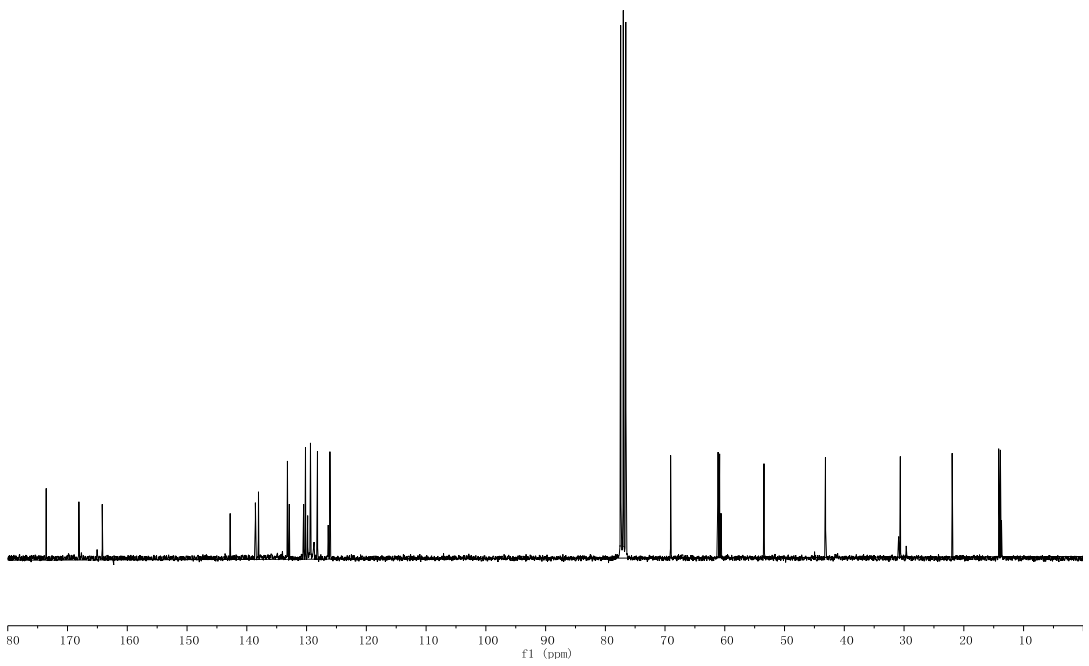

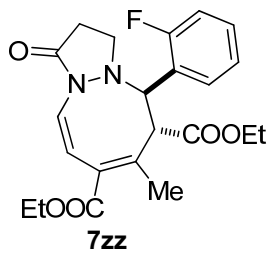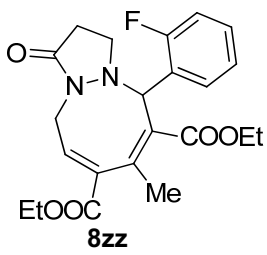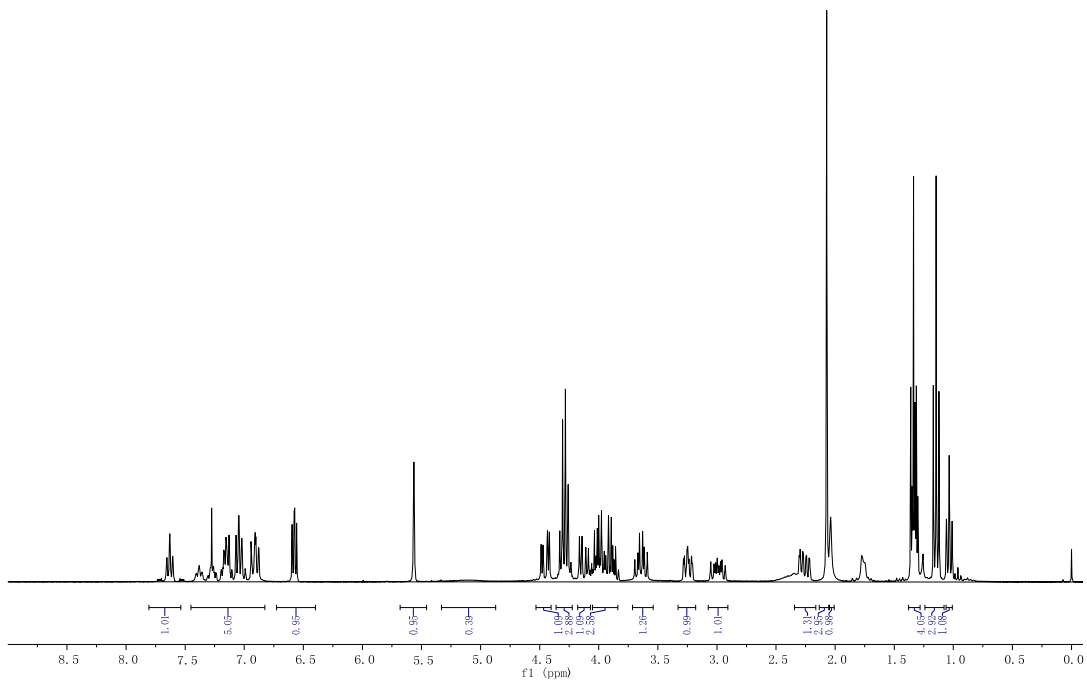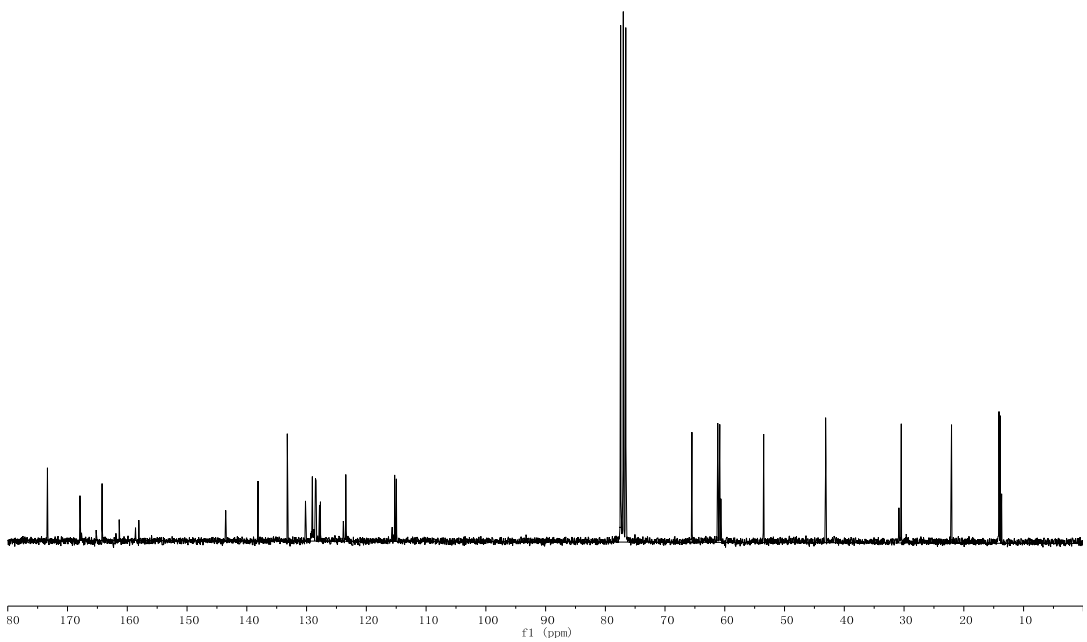

$^1\text{H}$ NMR of **7a** and **8a** in  $\text{CDCl}_3$  at room temperature

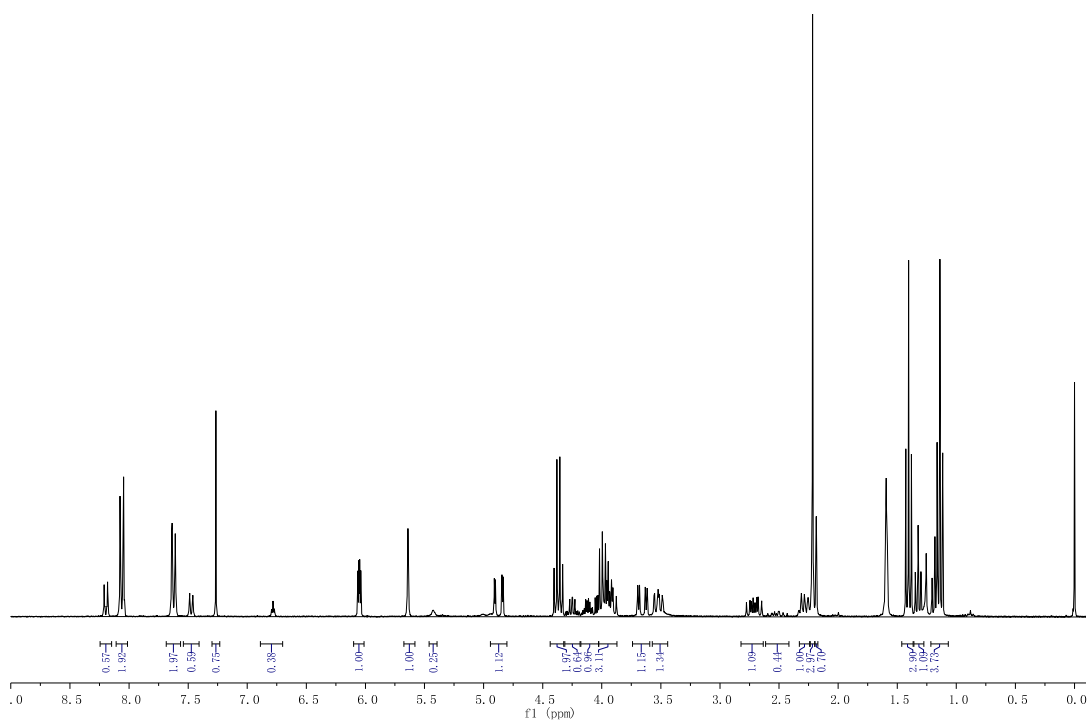

$^1\text{H}$ NMR of **7a** and **8a** in  $\text{CD}_2\text{Cl}_2$  at room temperature

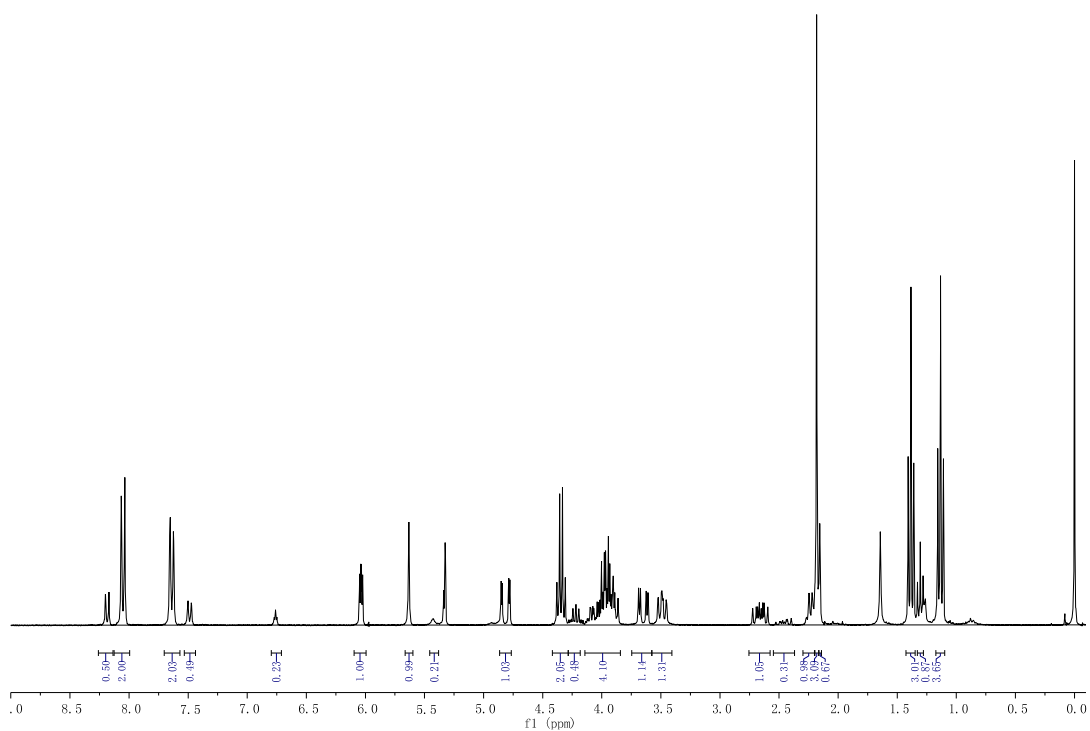

$^1\text{H NMR}$  of **7a** and **8a** in  $\text{CD}_2\text{Cl}_2$  at  $-40\text{ }^\circ\text{C}$

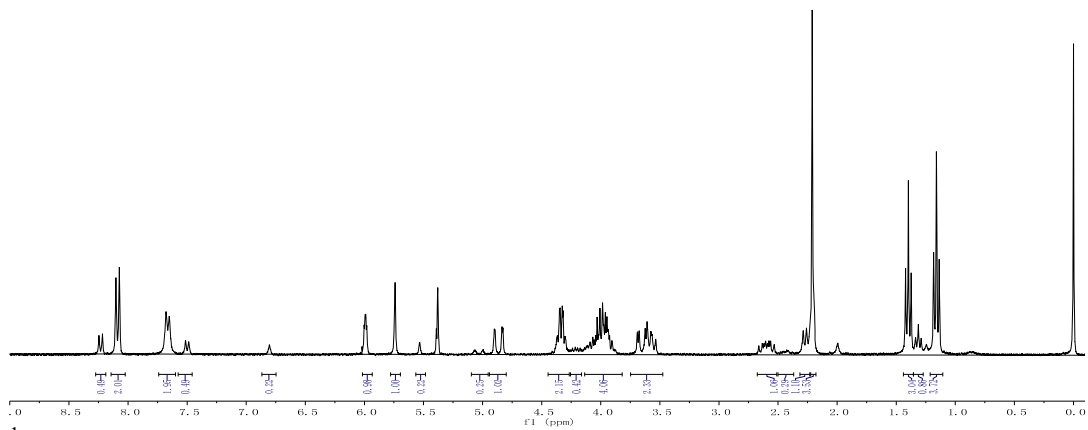

$^1\text{H NMR}$  of **7a** and **8a** in  $\text{CD}_2\text{Cl}_2$  at  $-60\text{ }^\circ\text{C}$

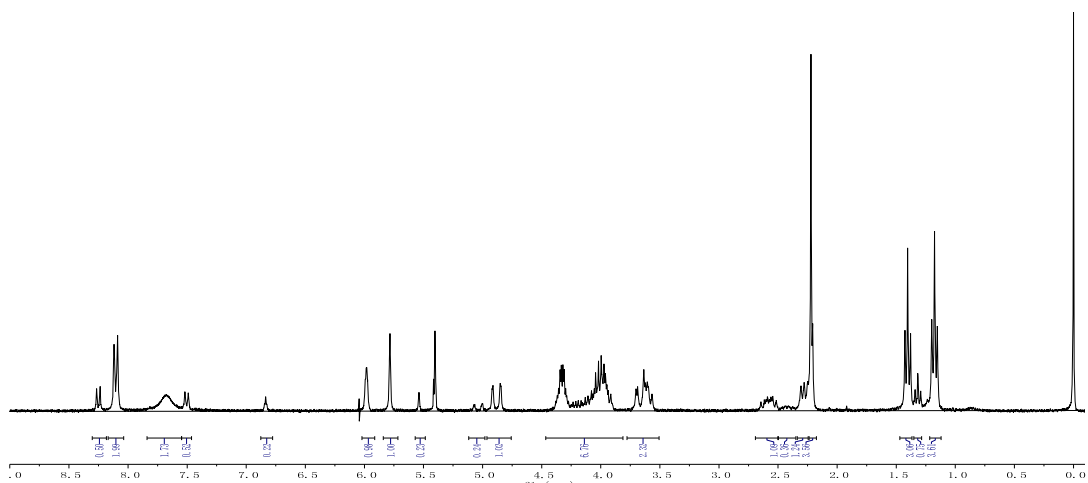

$^1\text{H NMR}$  of **7a** and **8a** in  $\text{CD}_2\text{Cl}_2$  at  $-80\text{ }^\circ\text{C}$

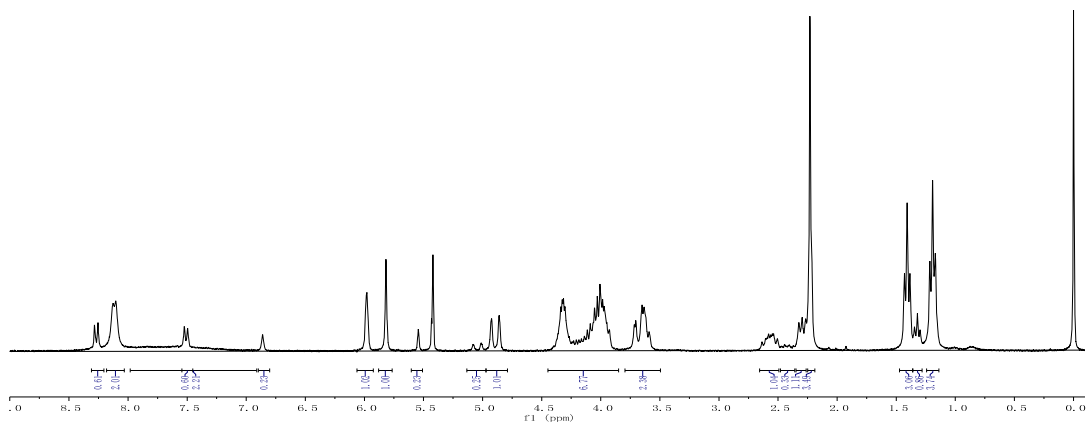

$^1\text{H}$ NMR of **7h** and **8h** in  $\text{CD}_2\text{Cl}_2$  at room temperature

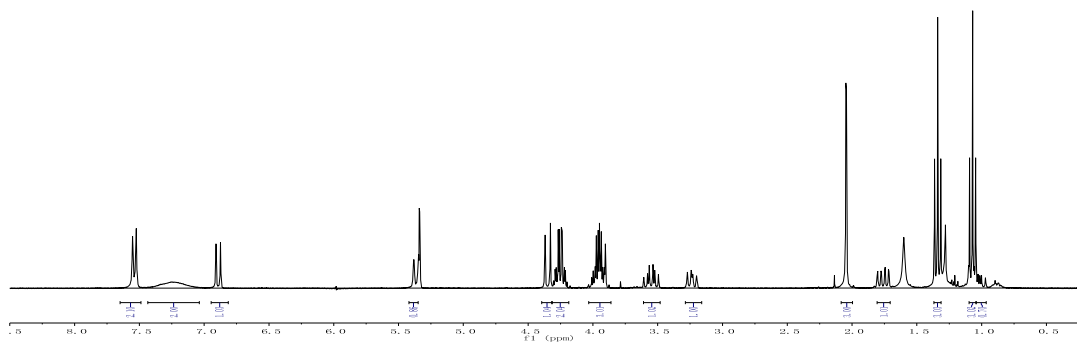

$^1\text{H}$  NMR of **7h** and **8h** in  $\text{CD}_2\text{Cl}_2$  at  $0\text{ }^\circ\text{C}$

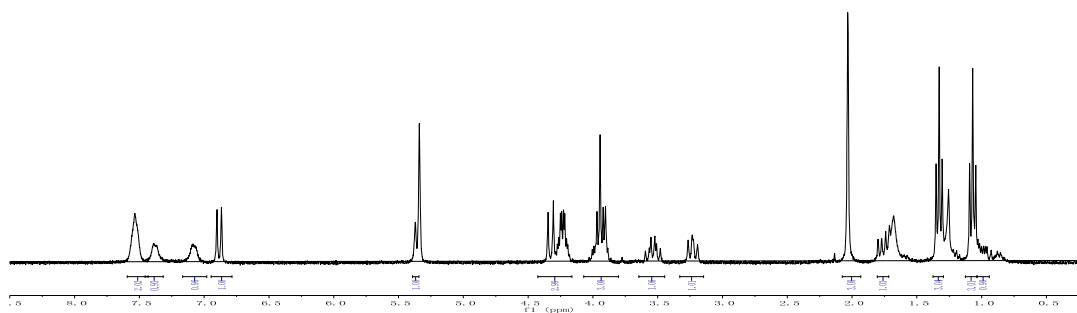

$^1\text{H}$ NMR of **7h** and **8h** in  $\text{CD}_2\text{Cl}_2$  at  $-10\text{ }^\circ\text{C}$

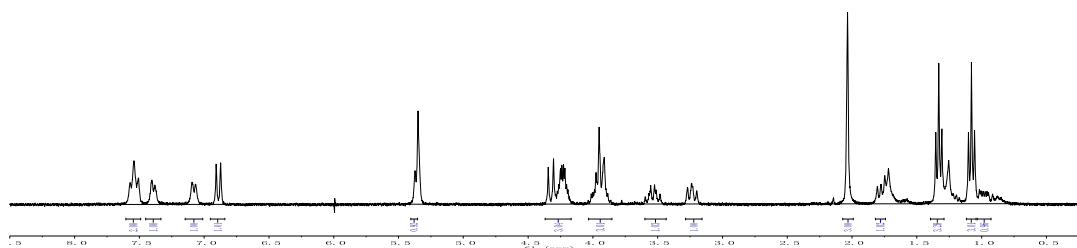

$^1\text{H}$ NMR of **7h** and **8h** in  $\text{CD}_2\text{Cl}_2$  at  $-20\text{ }^\circ\text{C}$

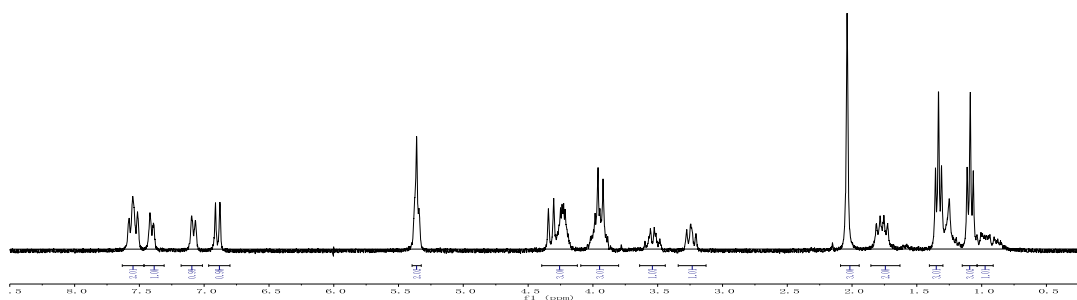

$^1\text{H}$ NMR of **7h** and **8h** in  $\text{CDCl}_3$  at room temperature

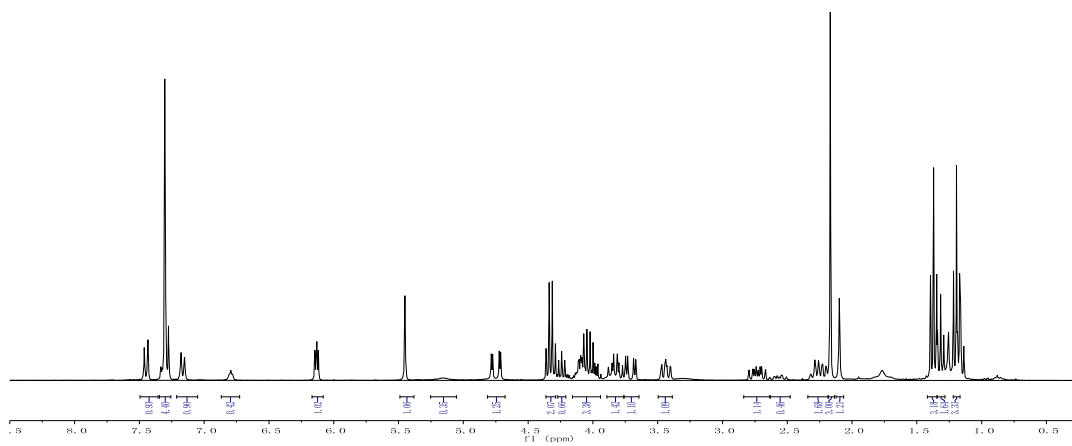

$^1\text{H}$ NMR of **7h** and **8h** in  $\text{CDCl}_3$  at  $0^\circ\text{C}$

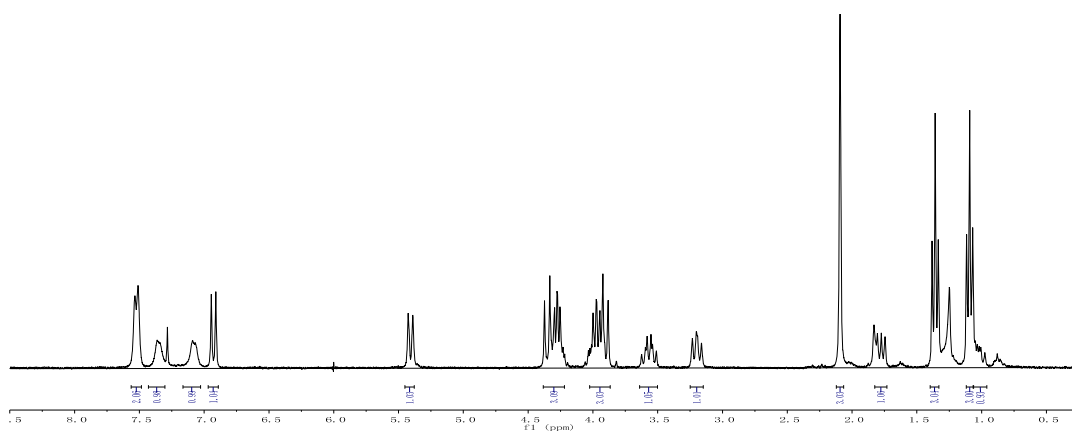

$^1\text{H}$ NMR of **7h** and **8h** in  $\text{CDCl}_3$  at  $-20^\circ\text{C}$

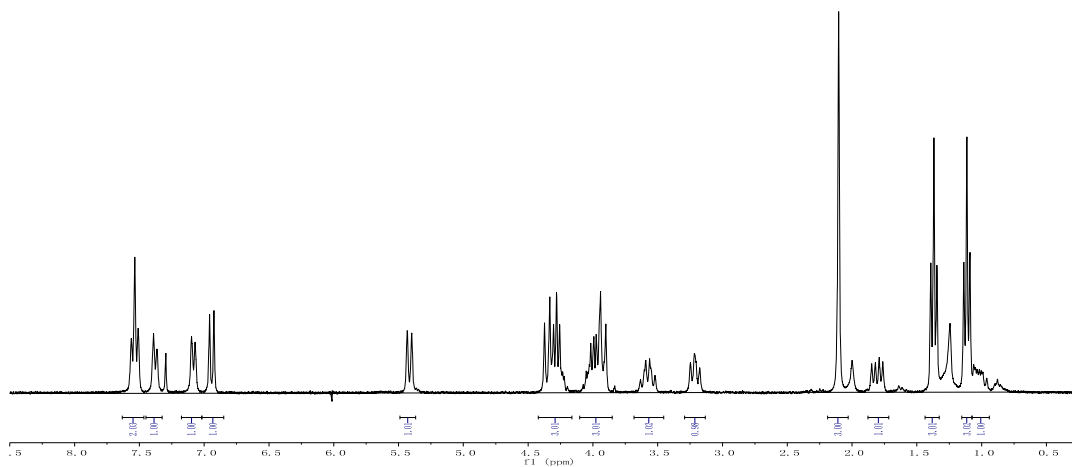

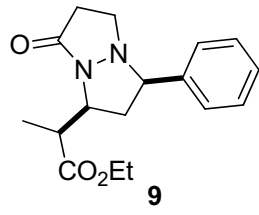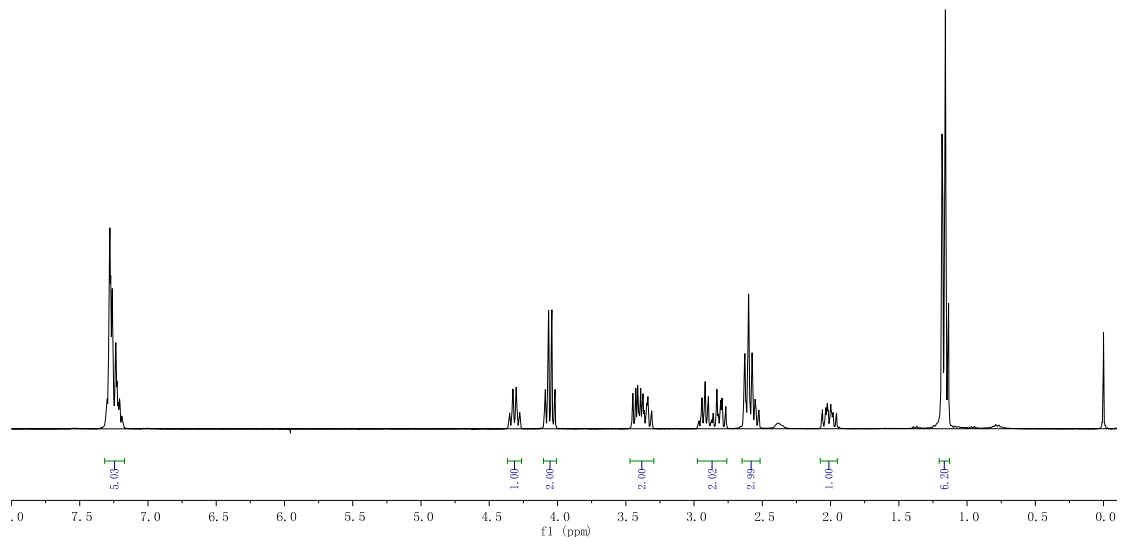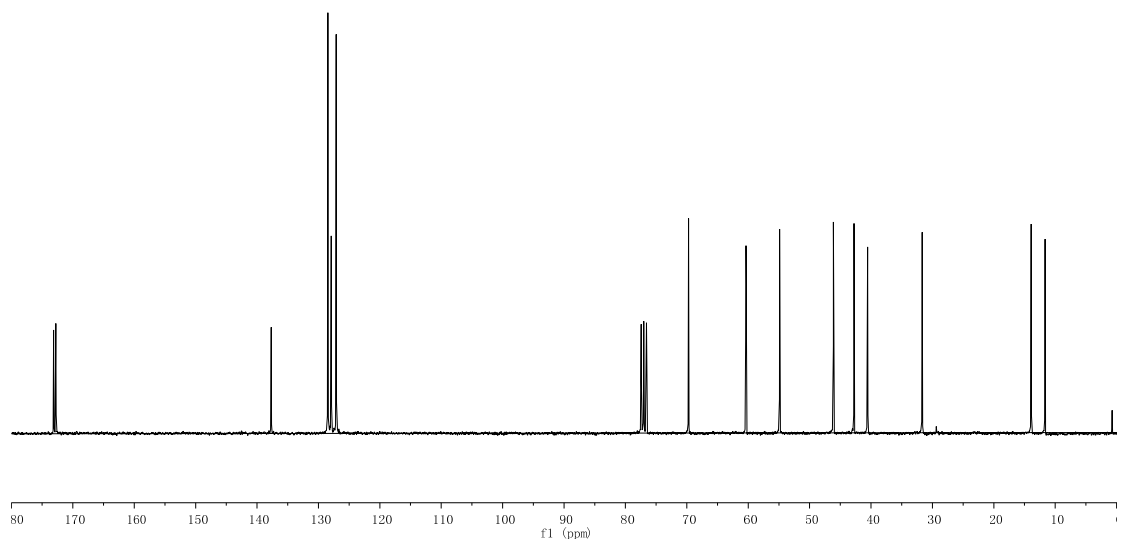

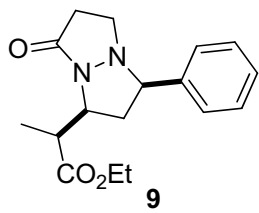

2D NMR COSY

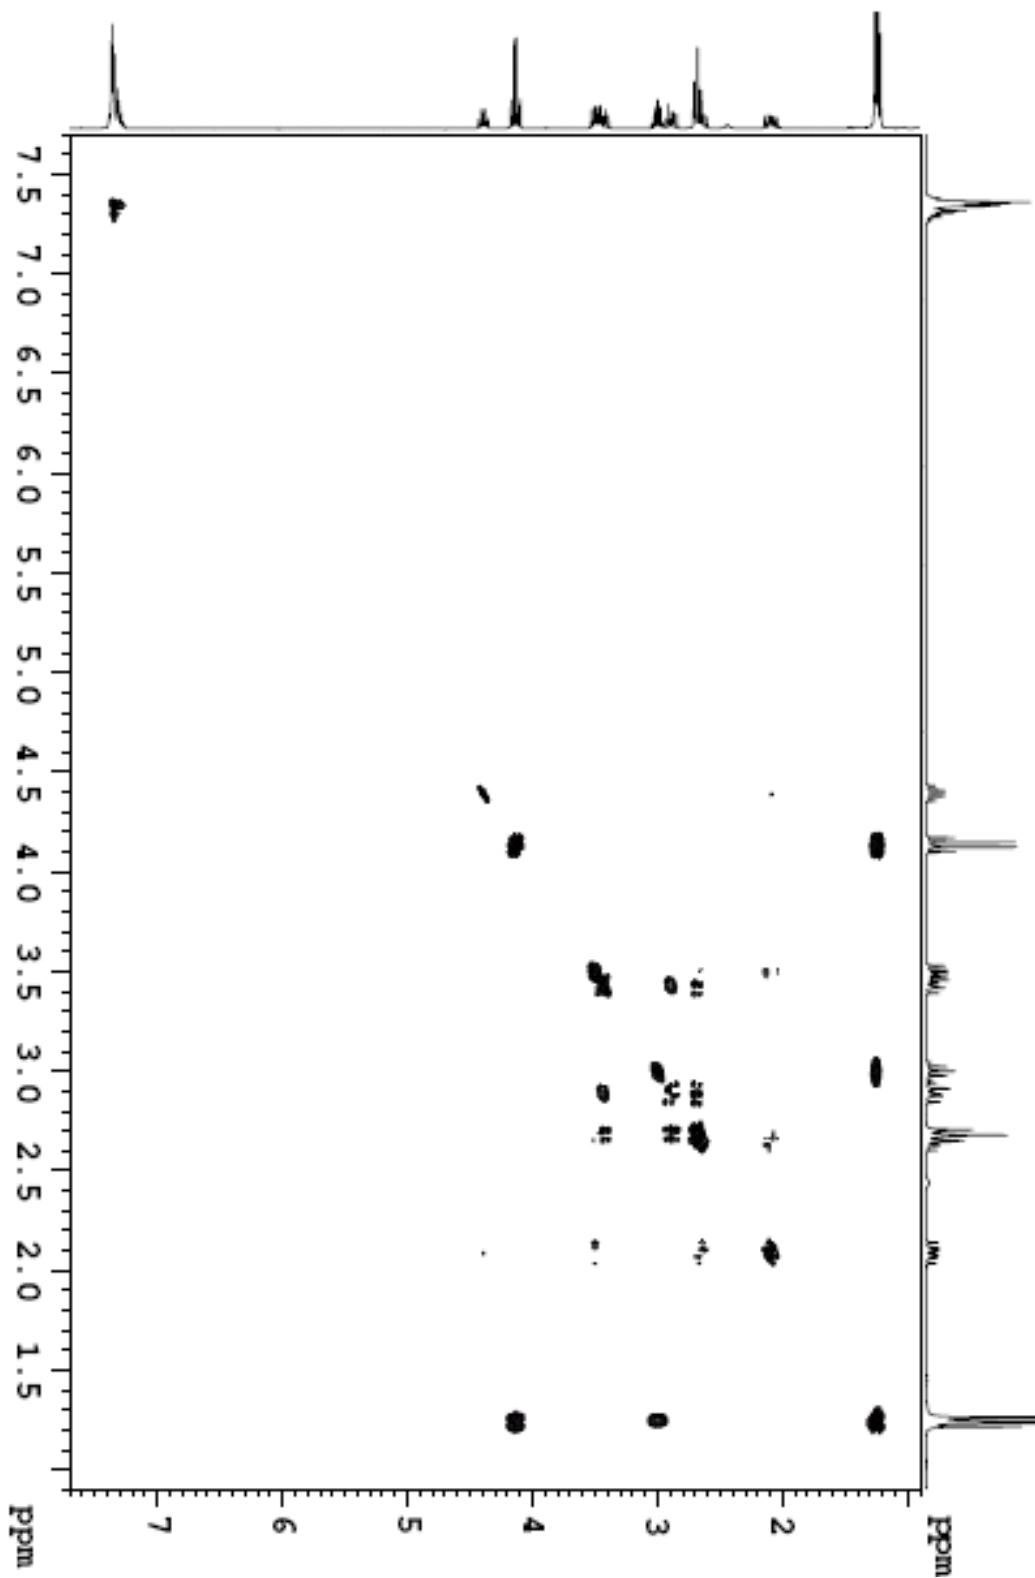



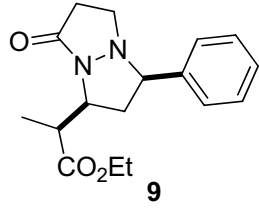

2D NMR HMQC

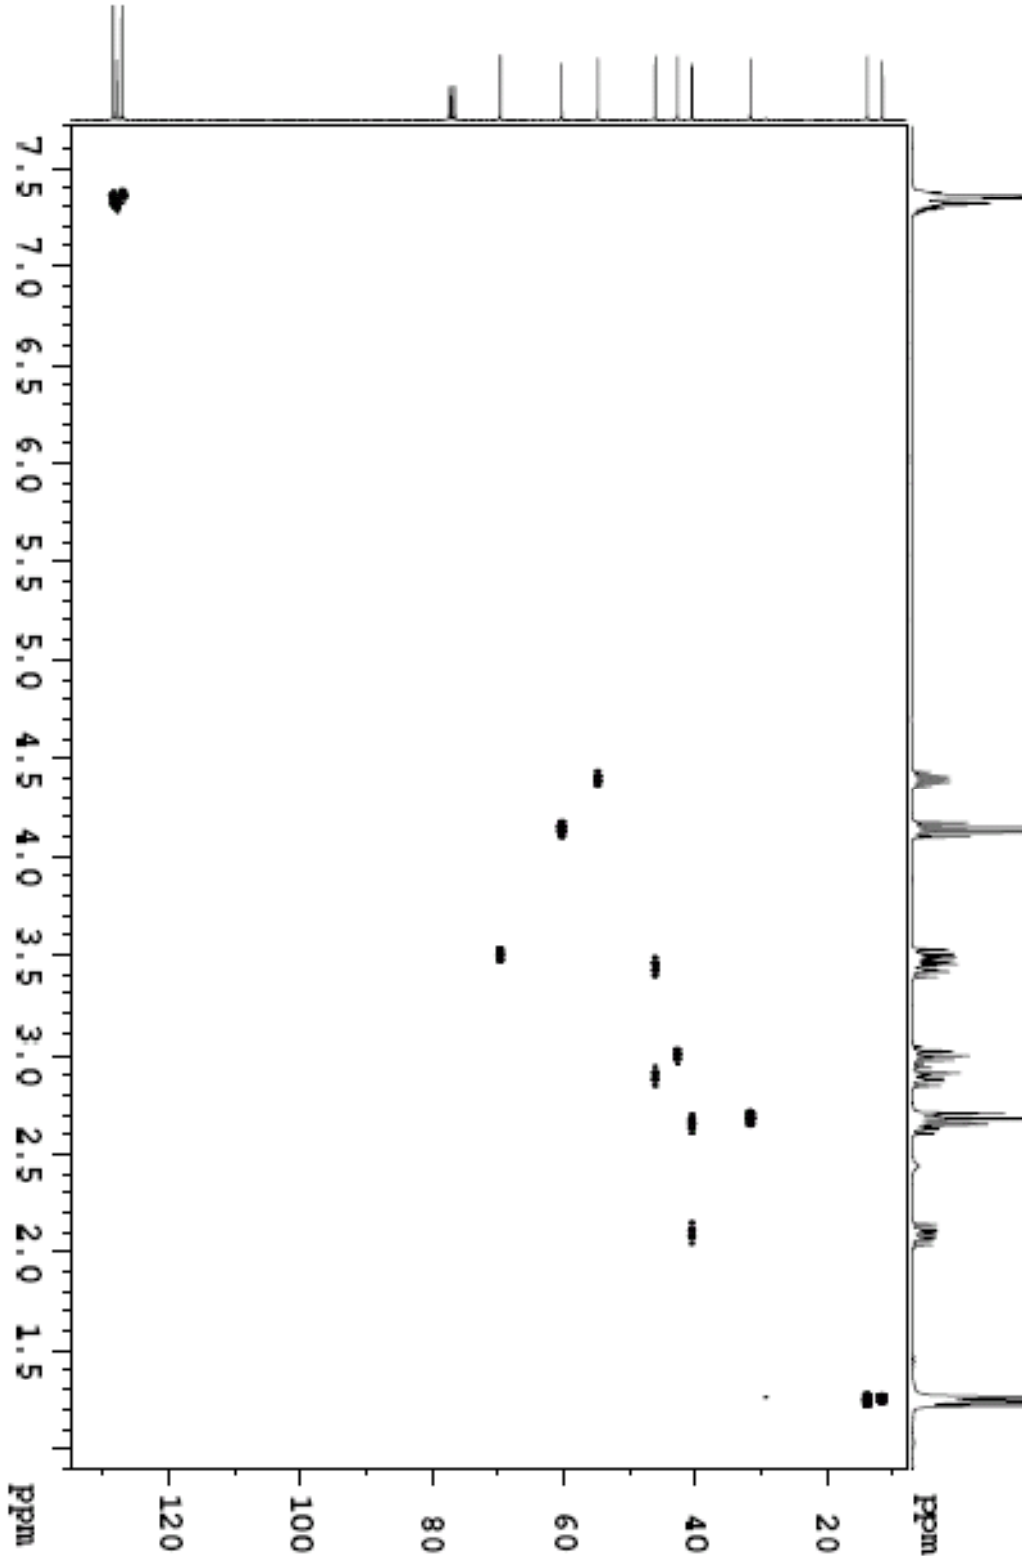

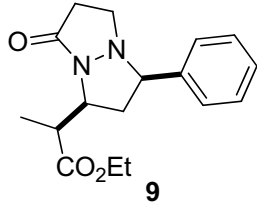

2D NMR HMBC

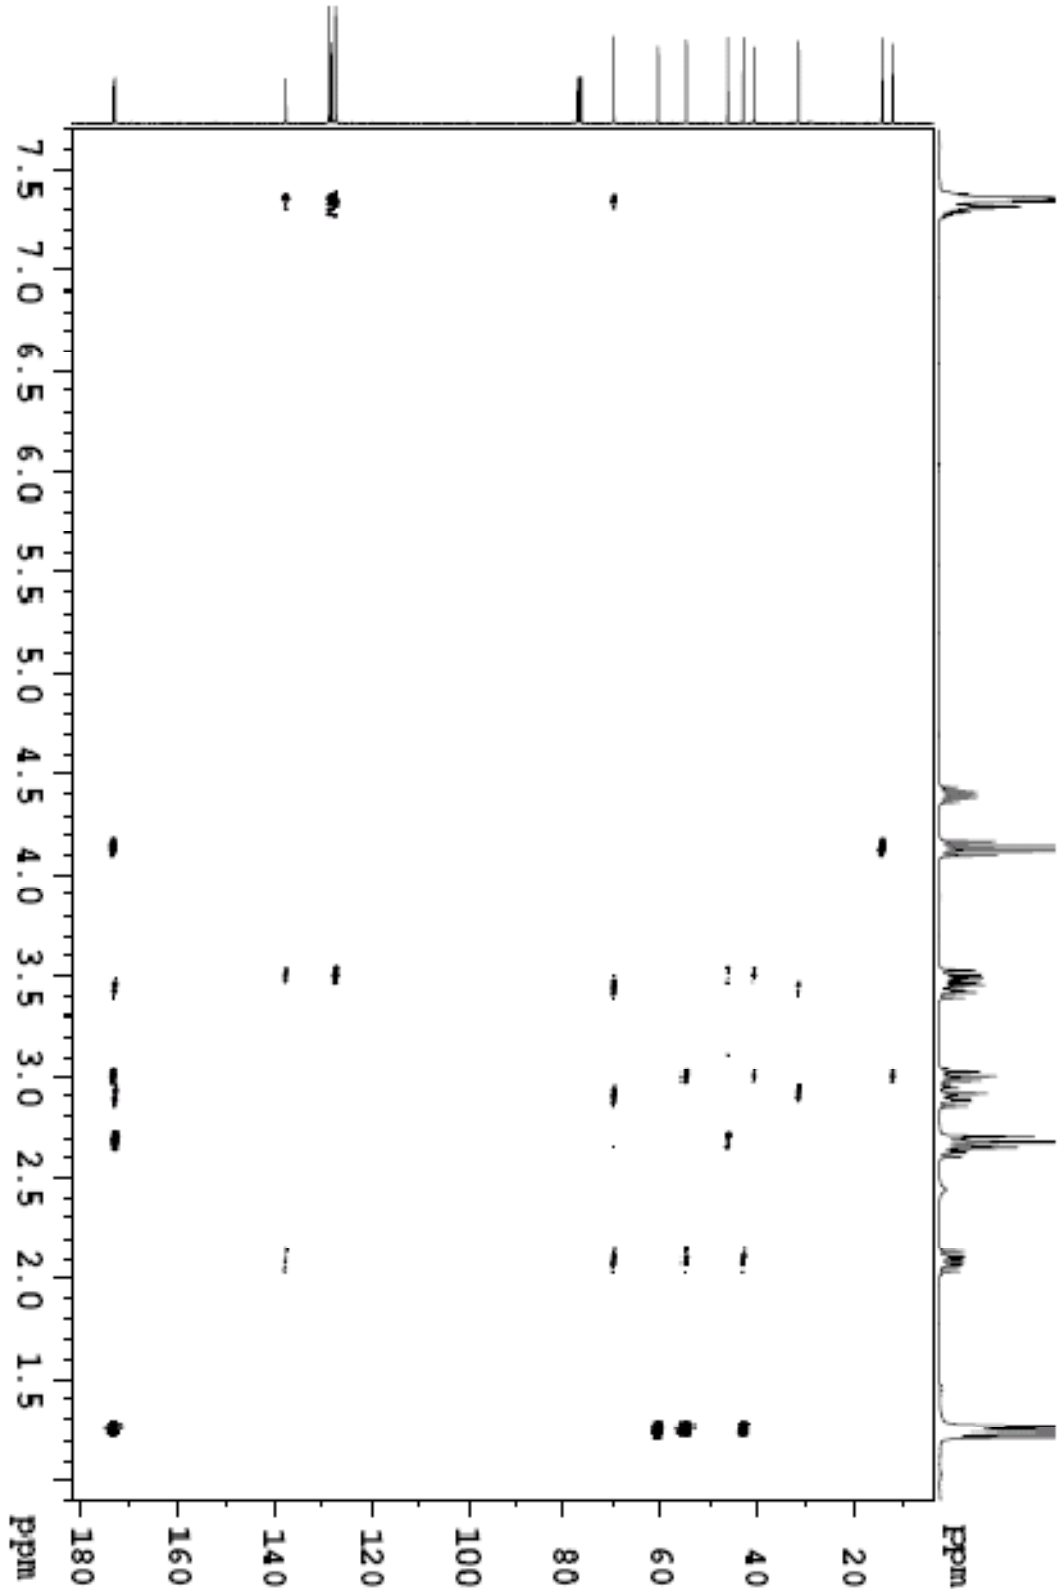

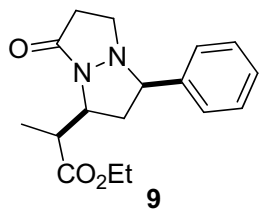

2D NMR NOESY

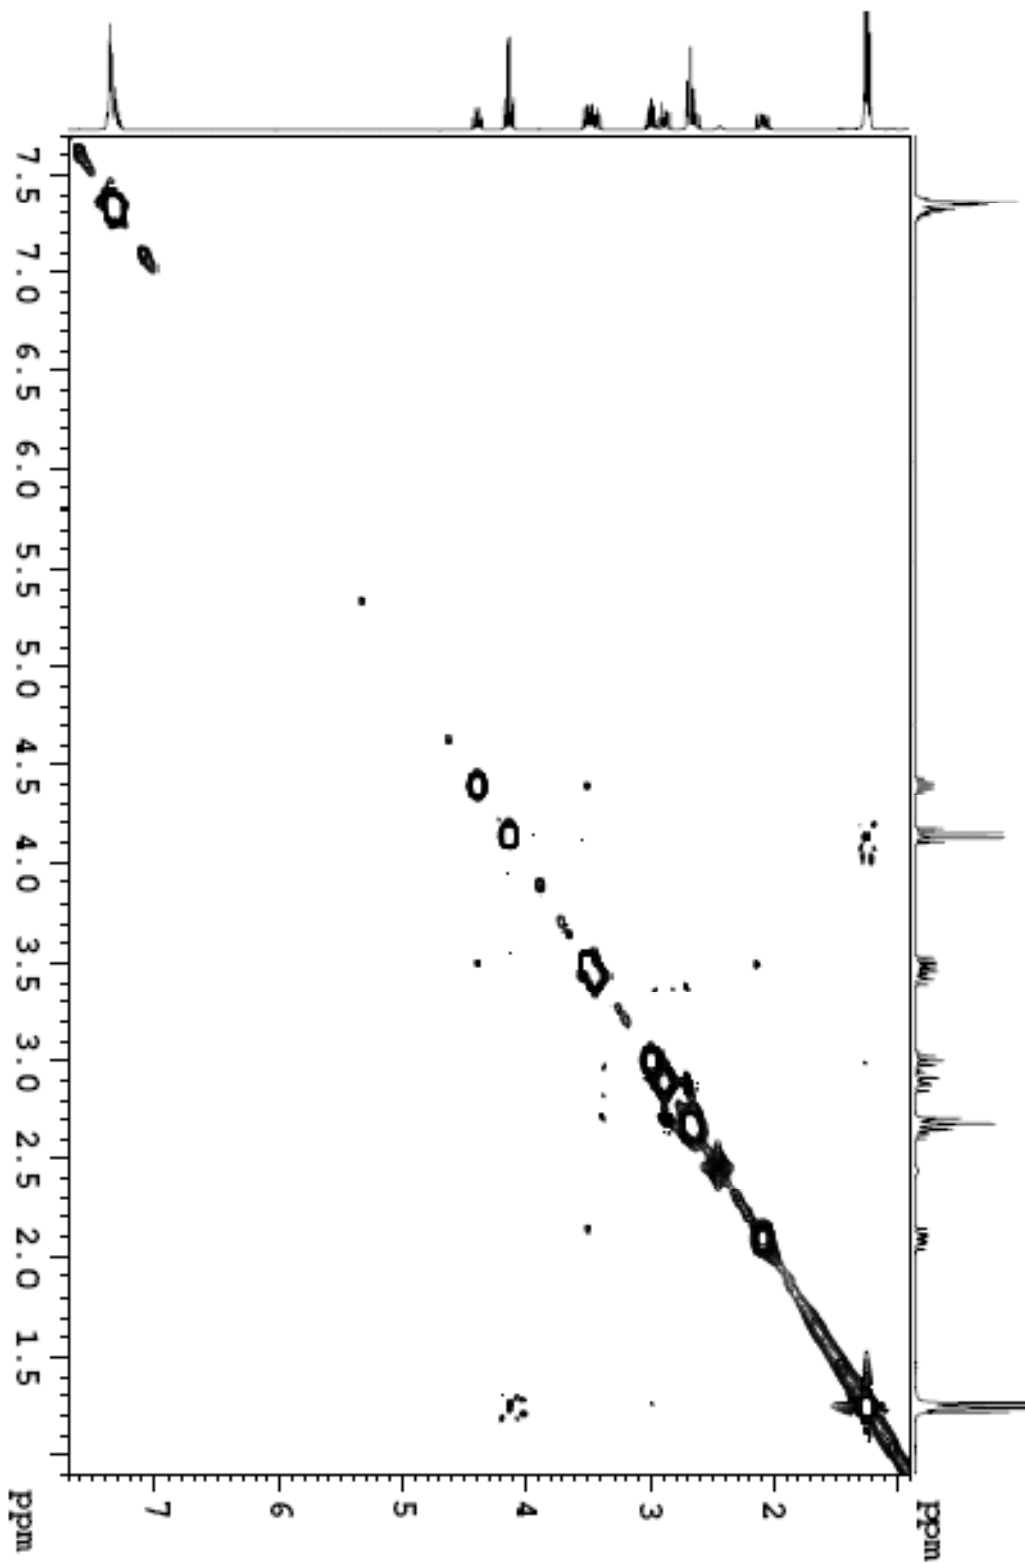

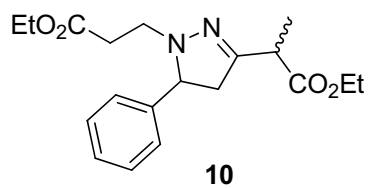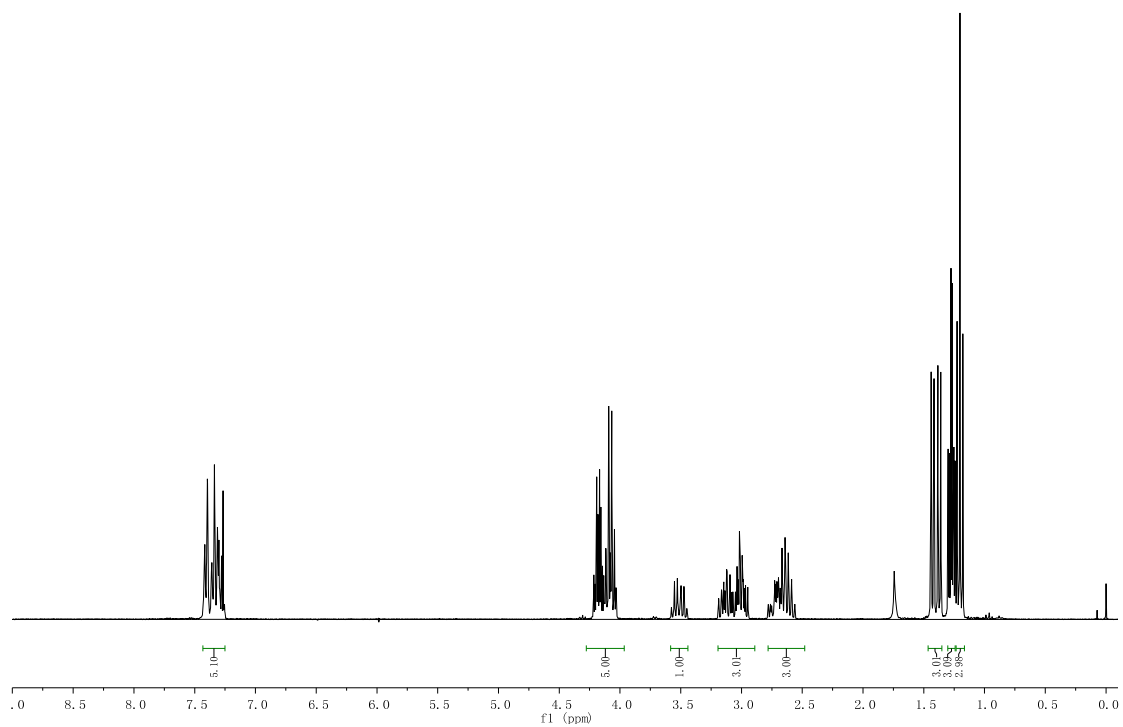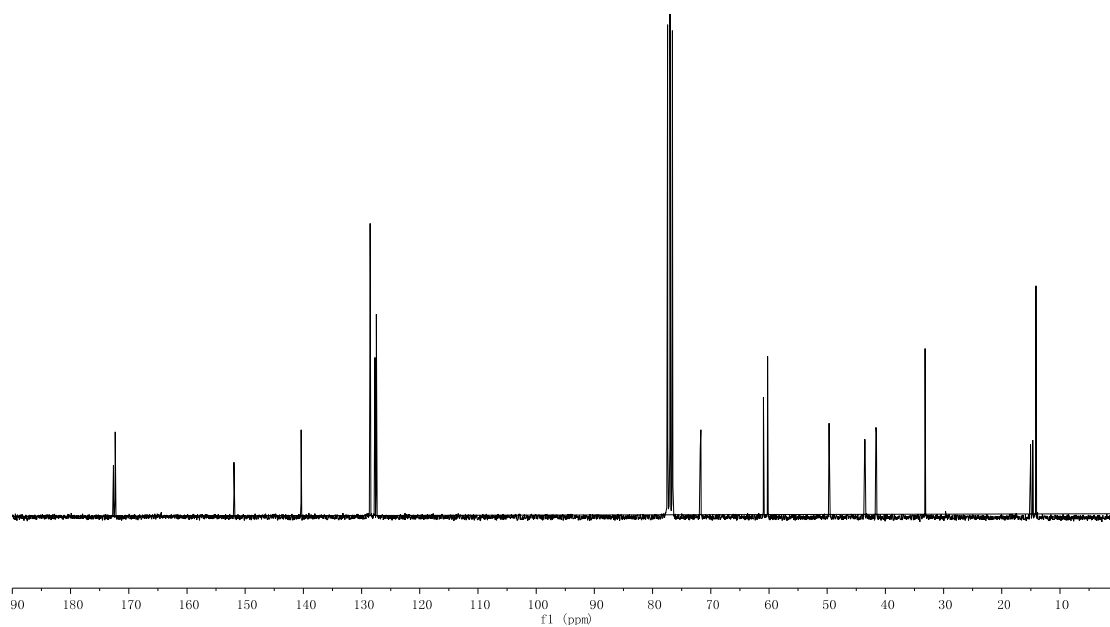

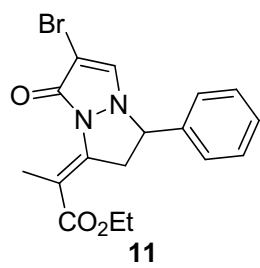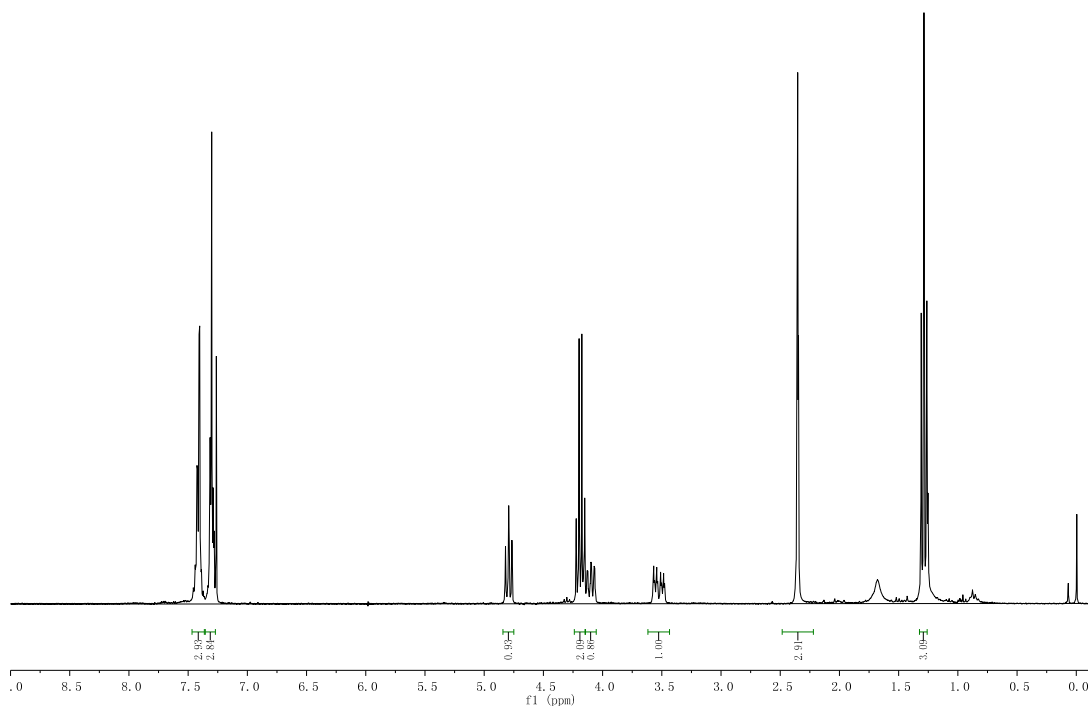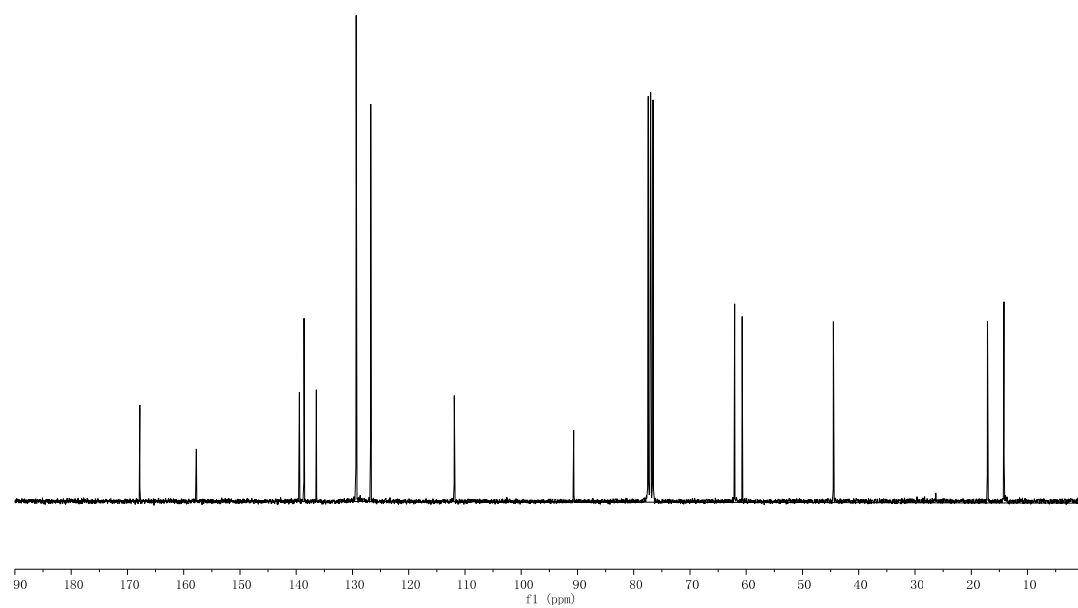

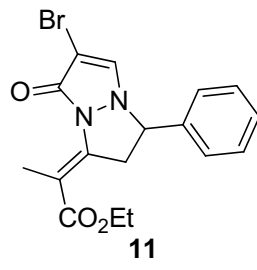

2D NMR COSY

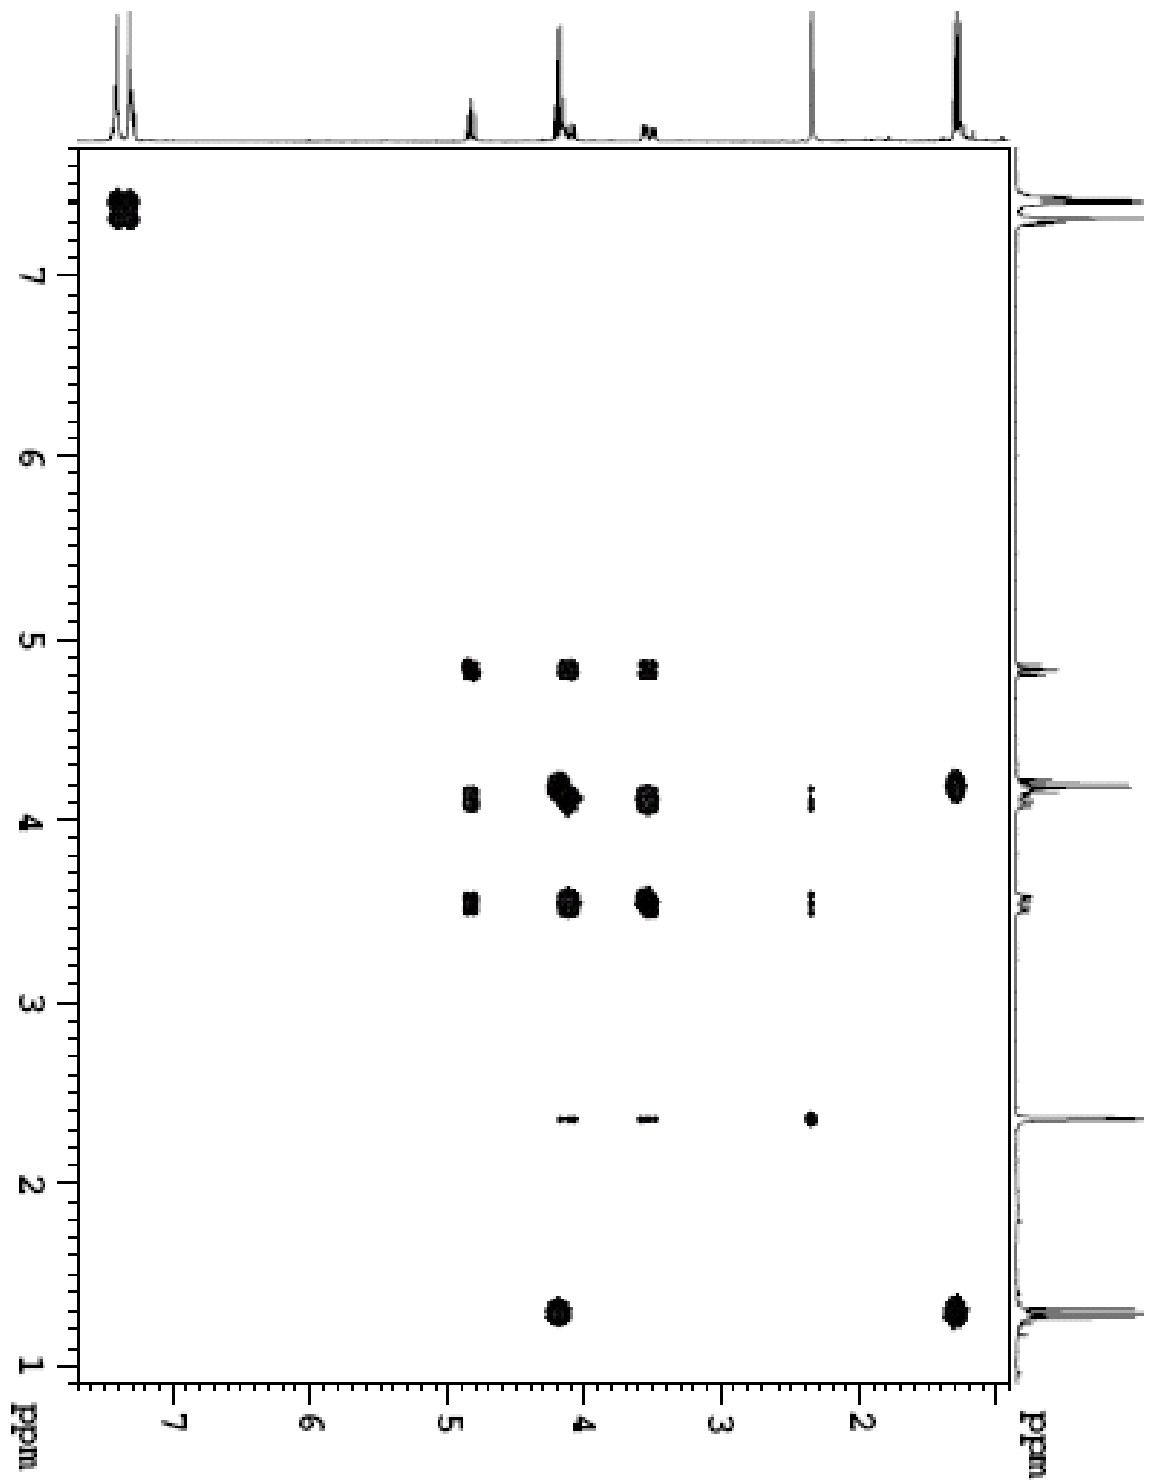

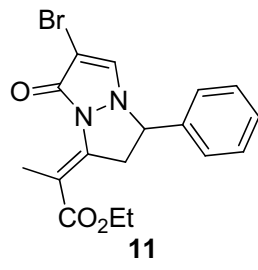

2D NMR HMQC

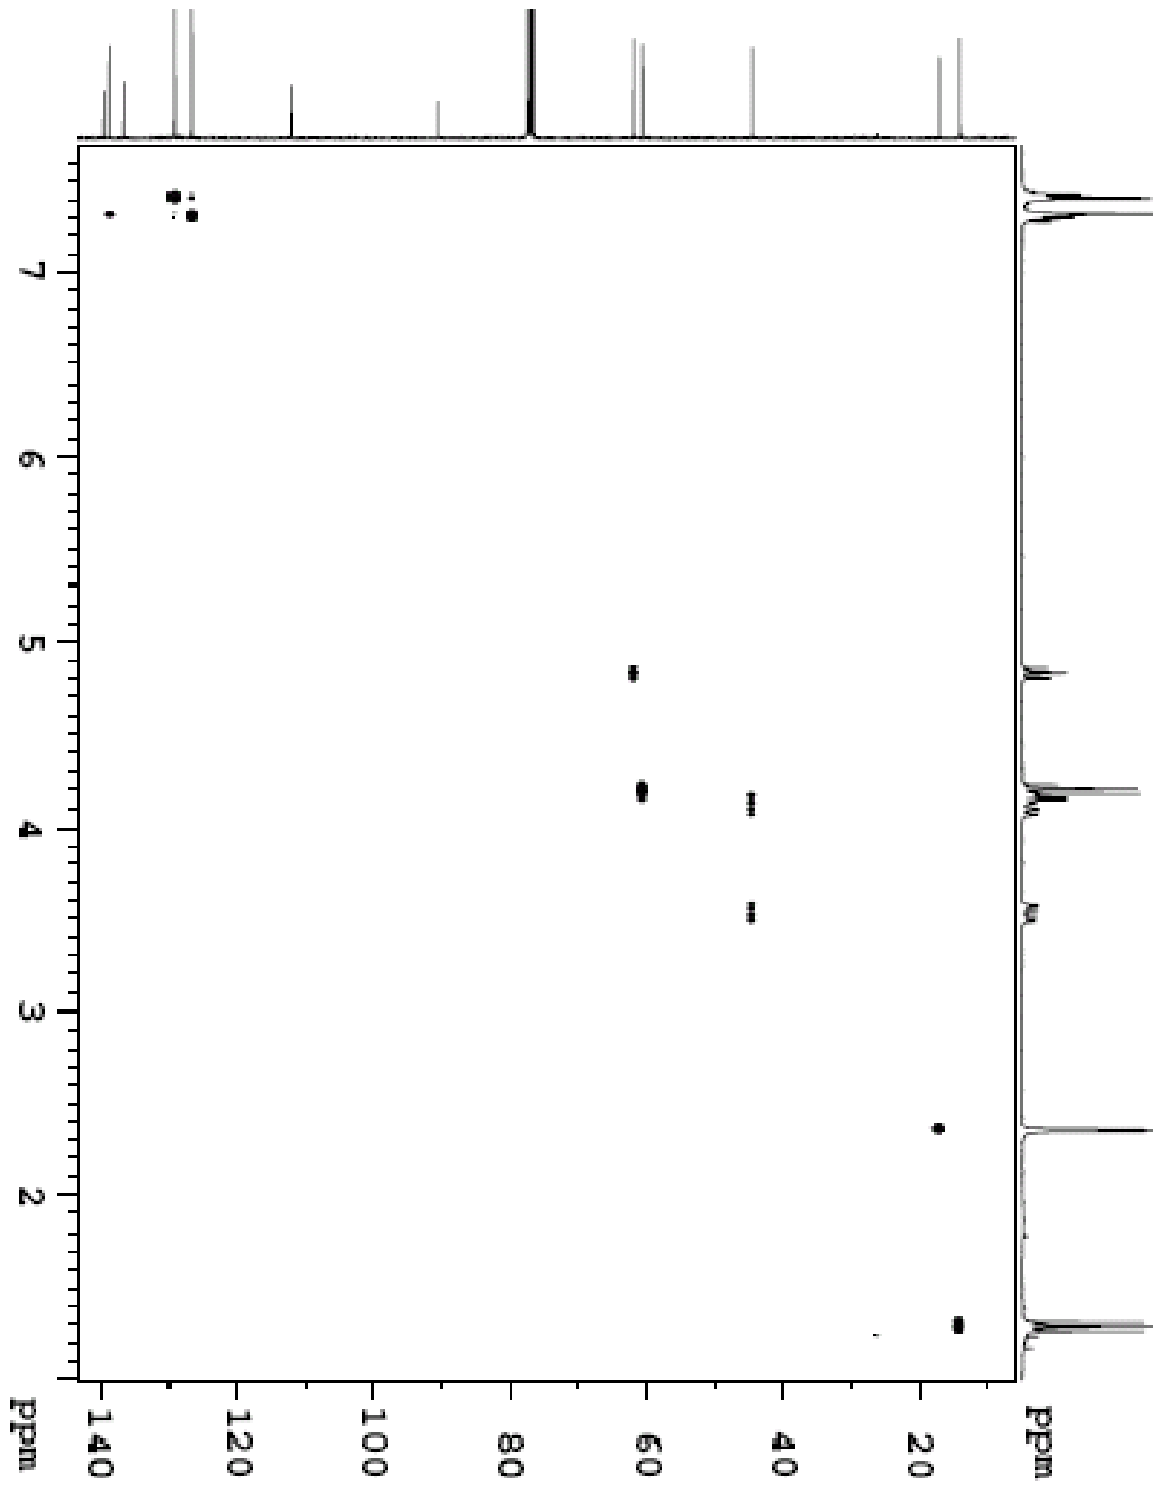

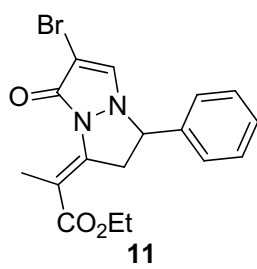

2D NMR HMBC

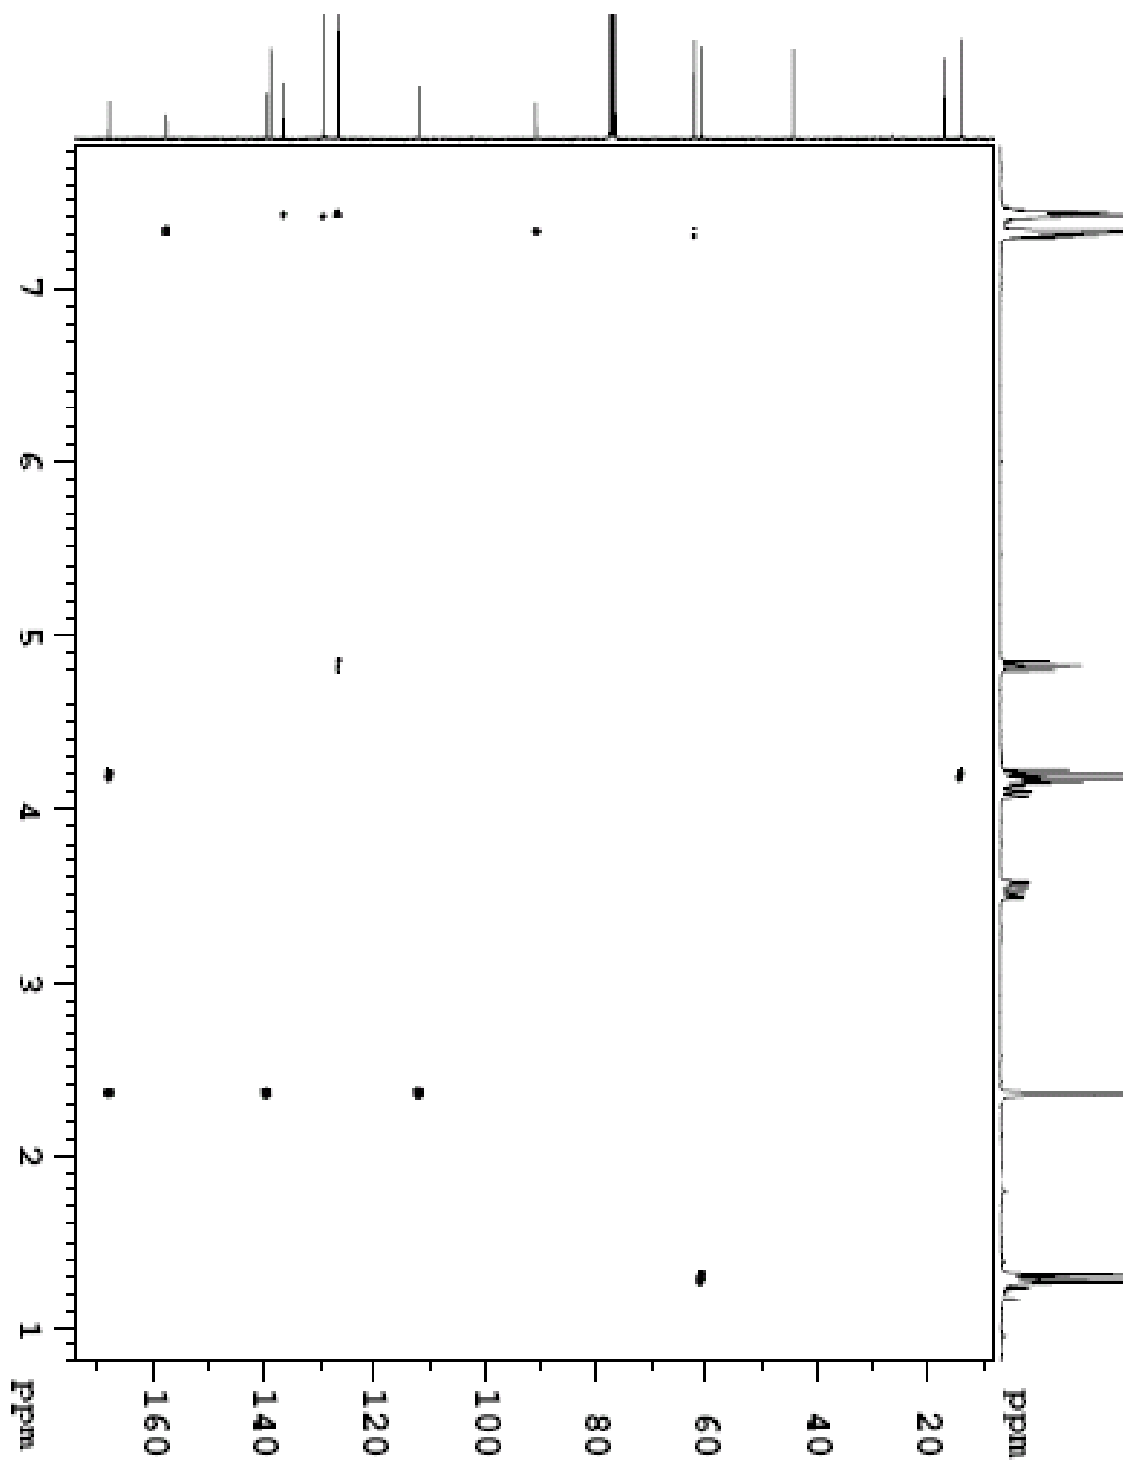



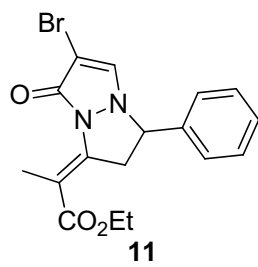

2D NMR NOESY

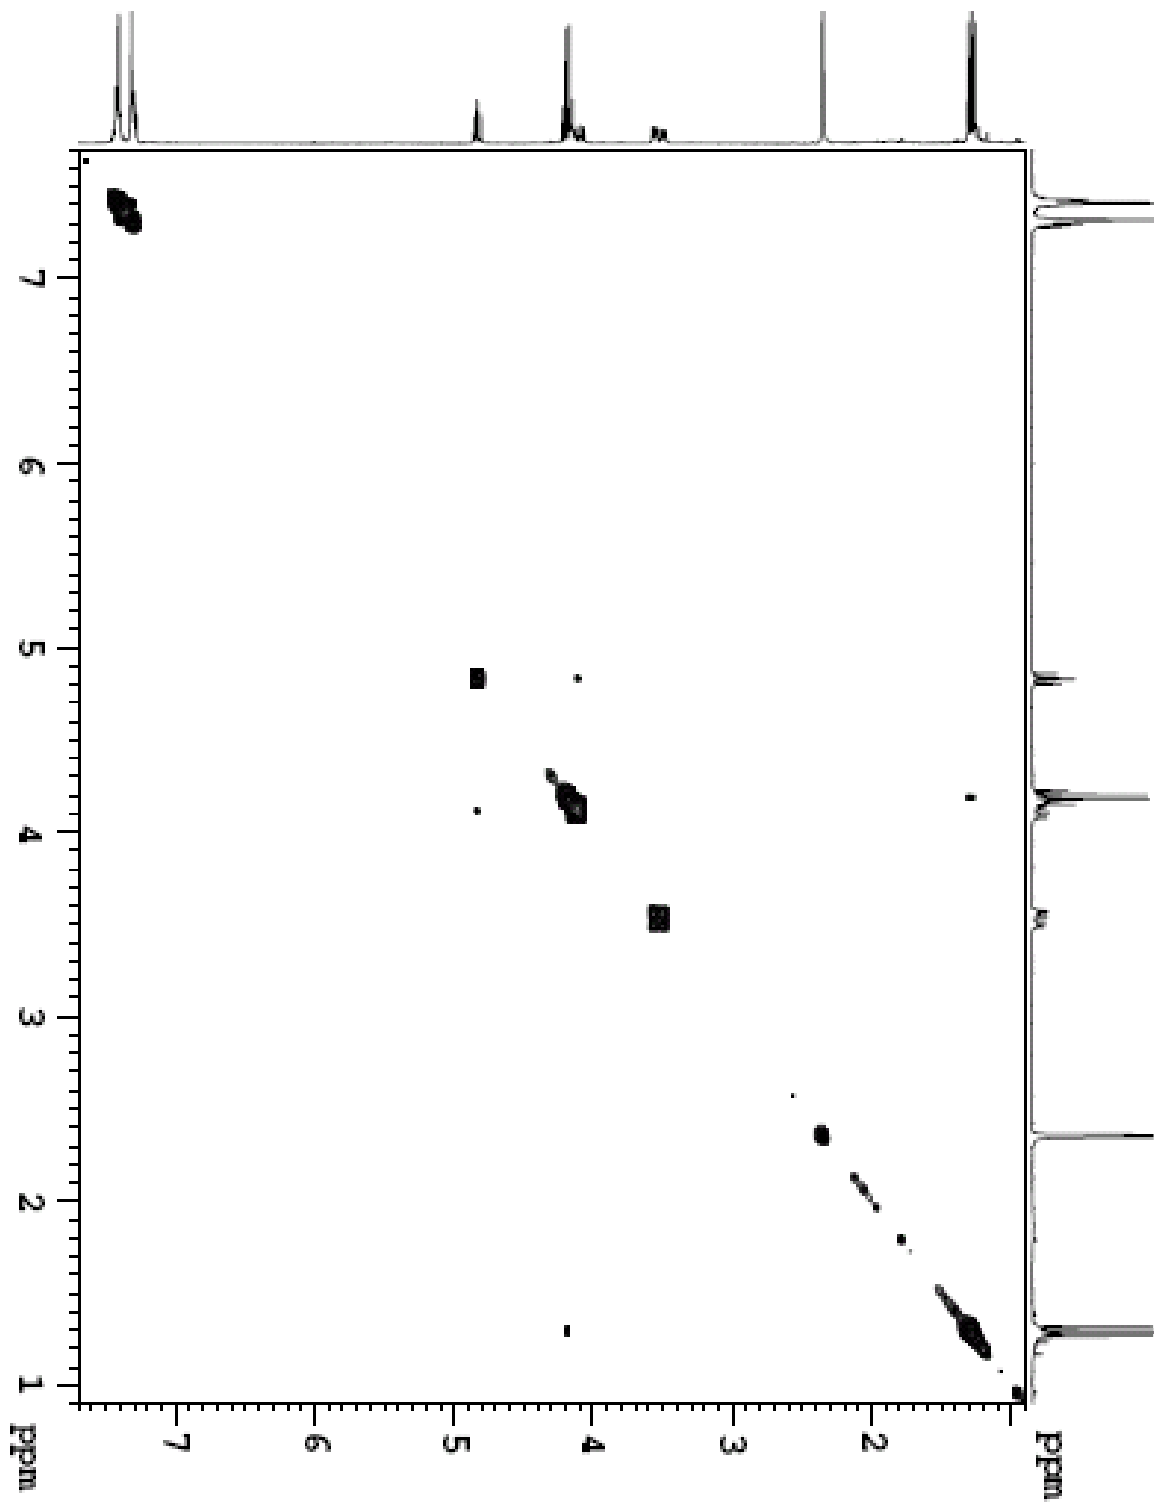

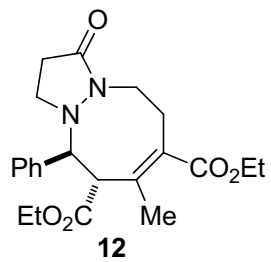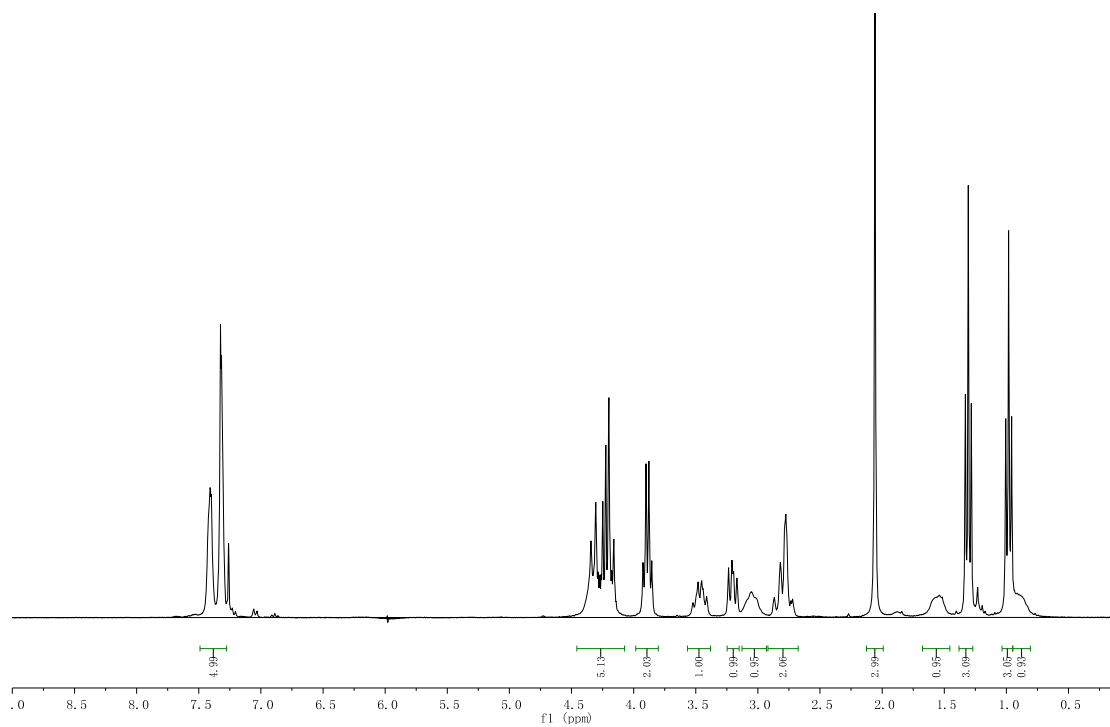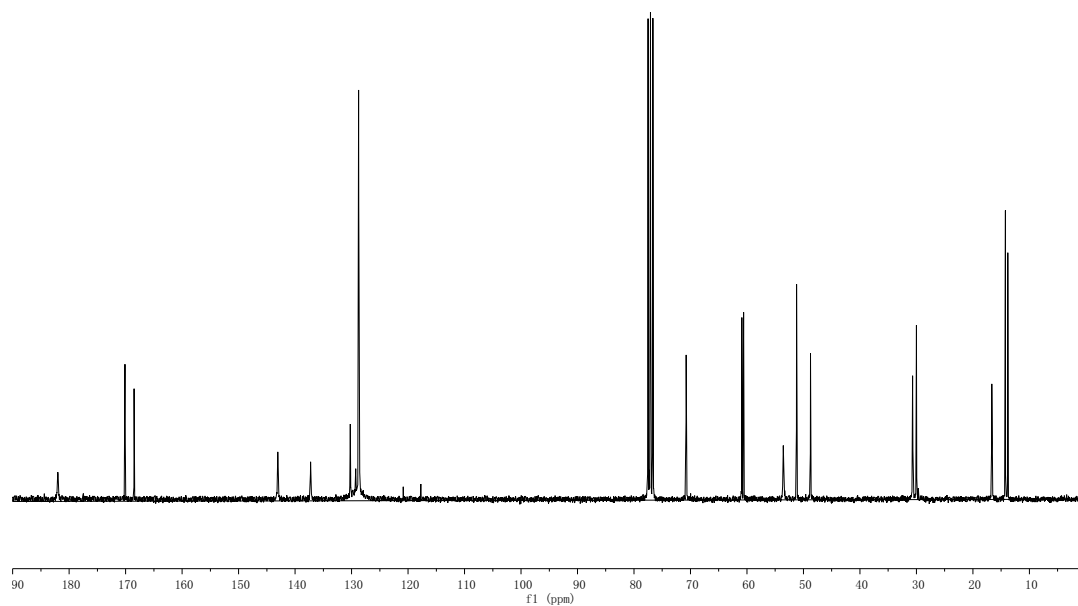

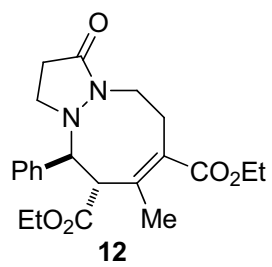

2D NMR COSY

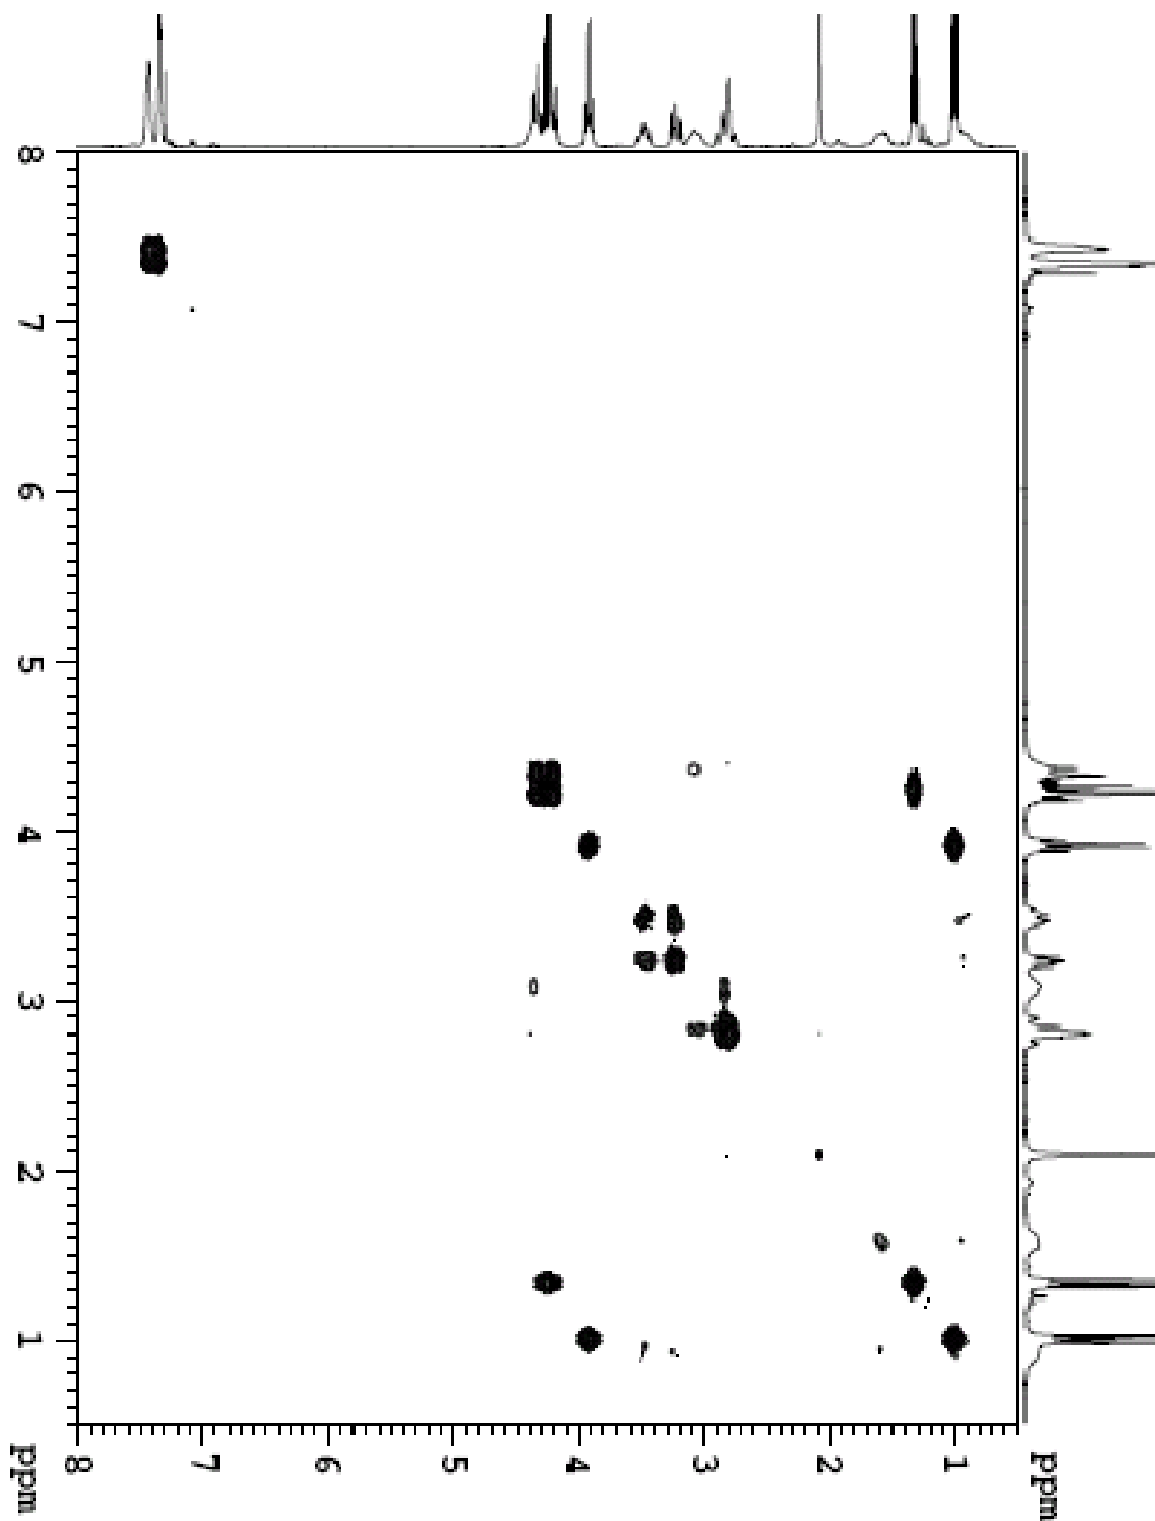

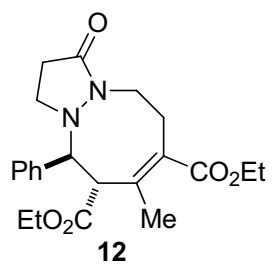

2D NMR HMQC

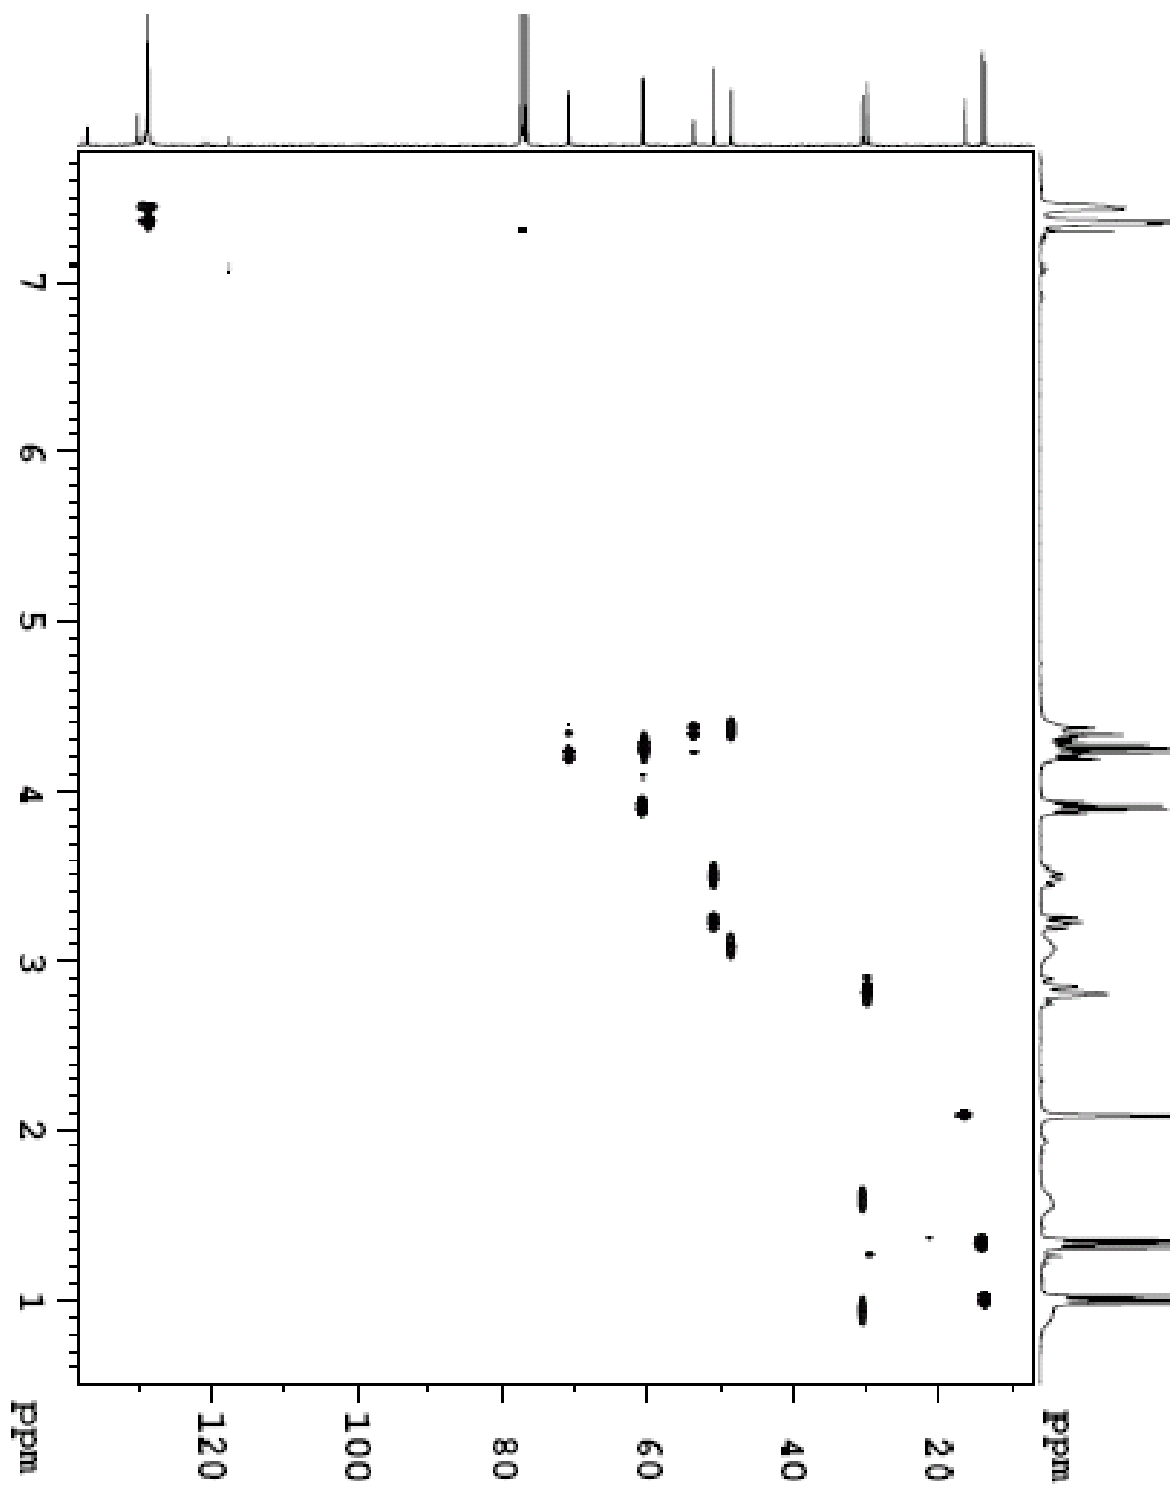

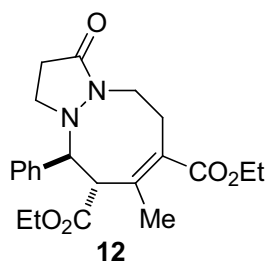

2D NMR HMBC

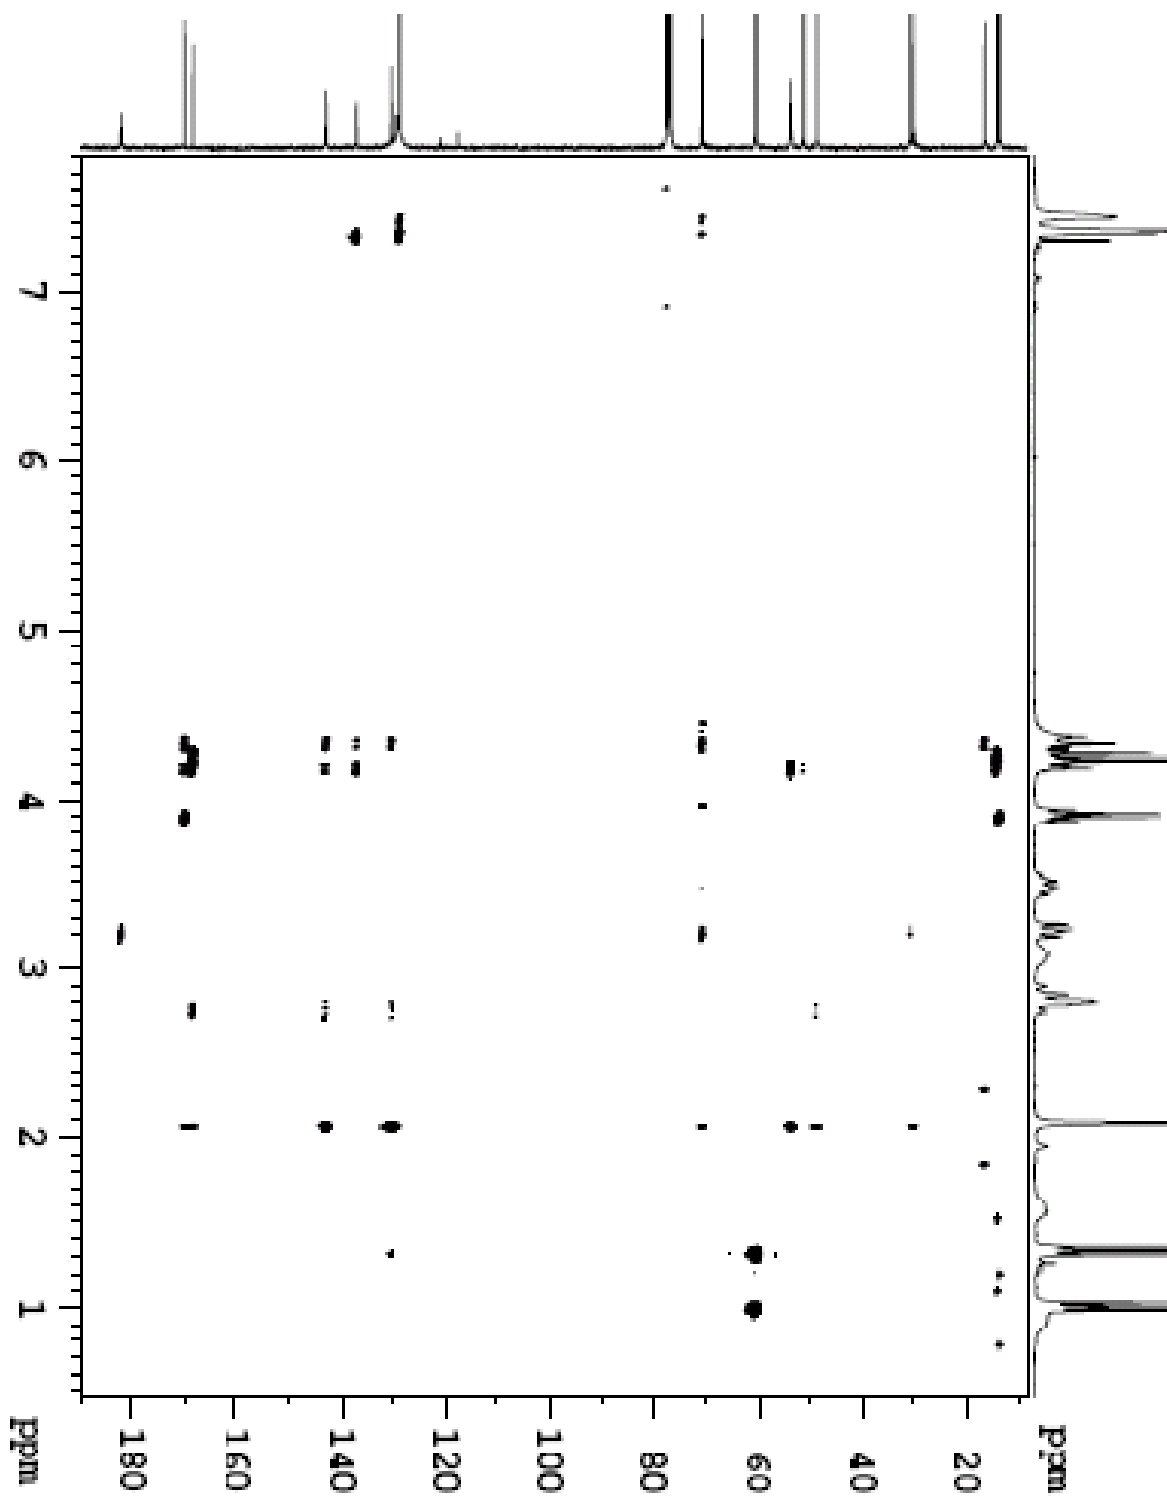

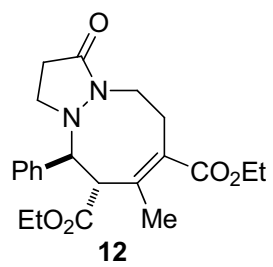

2D NMR NOESY

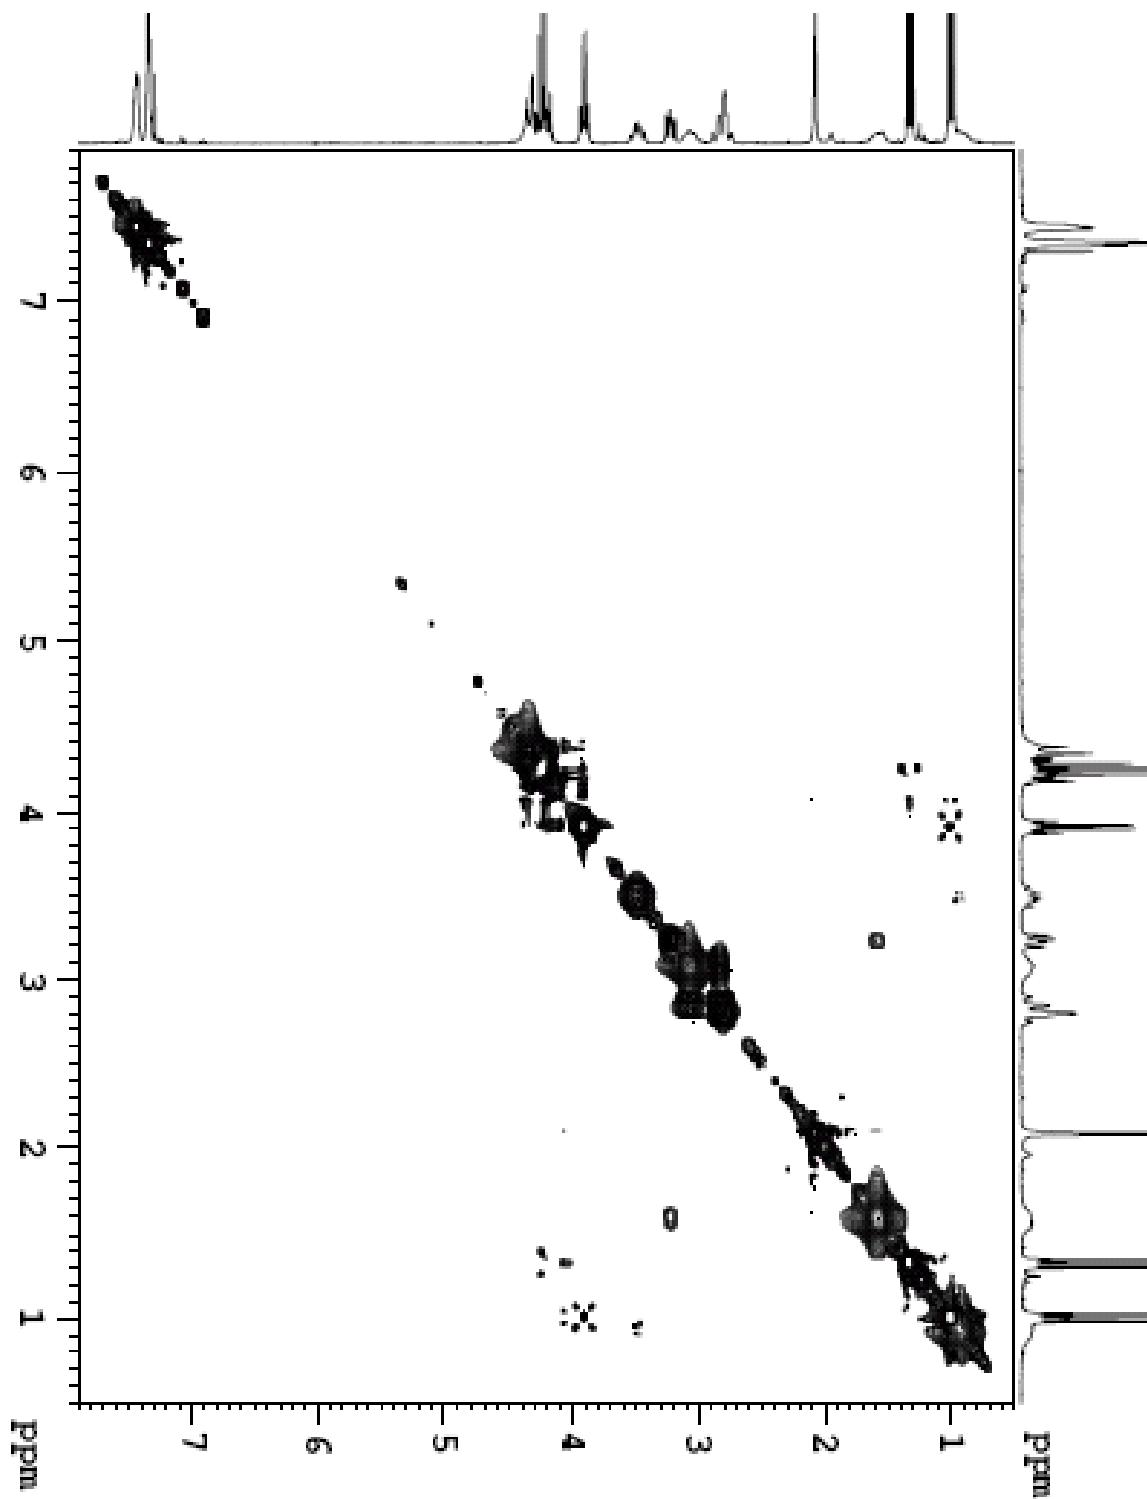

### HPLC chromatogram of racemic 3ba

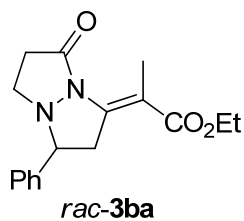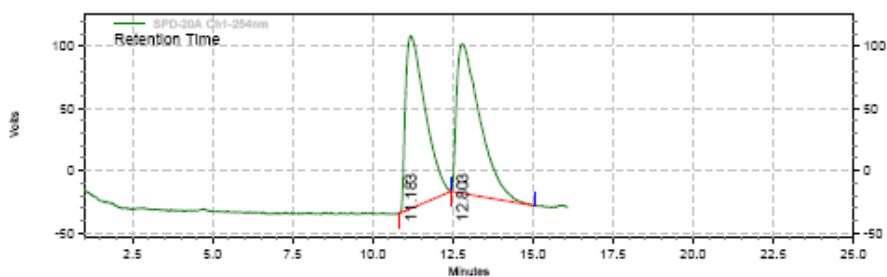

SPD-20A  
Ch1-254nm  
Results

| Retention Time | Area            | Area %        | Height        | Height %      |
|----------------|-----------------|---------------|---------------|---------------|
| 11.183         | 5897071         | 49.17         | 138860        | 53.65         |
| 12.803         | 6095423         | 50.83         | 119953        | 46.35         |
| <b>Totals</b>  | <b>11992494</b> | <b>100.00</b> | <b>258813</b> | <b>100.00</b> |

### HPLC chromatogram of chiral 3ba

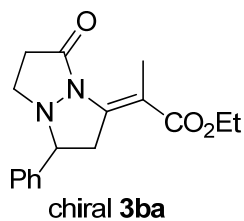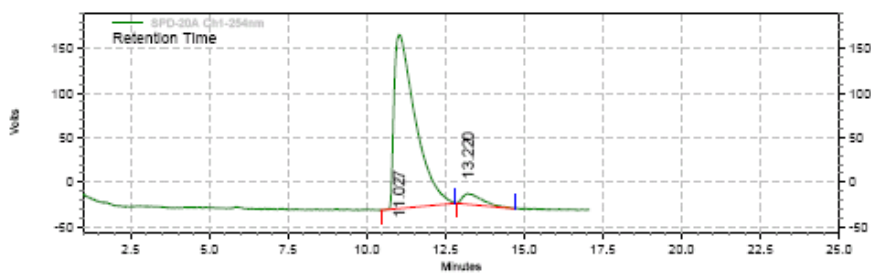

SPD-20A  
Ch1-254nm  
Results

| Retention Time | Area           | Area %        | Height        | Height %      |
|----------------|----------------|---------------|---------------|---------------|
| 11.027         | 9174997        | 94.51         | 194979        | 94.20         |
| 13.220         | 532587         | 5.49          | 12015         | 5.80          |
| <b>Totals</b>  | <b>9707584</b> | <b>100.00</b> | <b>206994</b> | <b>100.00</b> |

## Computational Methods

Calculations were performed using density functional theory (DFT) with the M06 functional,<sup>6</sup> as implemented in Jaguar 7.6.110.<sup>7</sup> Geometry optimizations were performed using the 6-31G\*\* basis set,<sup>8,9</sup> while energies were computed using the correlation-consistent polarized triple- $\zeta$  basis set cc-pVTZ++ basis set for all atoms. For each optimized structure, the M06 analytic Hessian was calculated to obtain the vibrational frequencies, which in turn were used to obtain the zero point energies and free energy corrections (without translational or rotational components). Solvent corrections were based on single point self-consistent Poisson-Boltzmann continuum solvation calculations (using the 6-31G\*\* basis set) for CH<sub>2</sub>Cl<sub>2</sub> ( $\epsilon = 8.93$  and  $R_0 = 2.33$  Å using the PBF<sup>10</sup> module in Jaguar).

## XYZ Coordinates

| 7b |               |               |               |
|----|---------------|---------------|---------------|
| N1 | 0.3834869123  | -0.0155129298 | 0.8850189423  |
| N2 | 0.1402691904  | -0.2728011462 | -0.4981513086 |
| C3 | -1.2030566760 | -0.4578810475 | -0.7882957908 |
| C4 | -1.9762882821 | -0.1291077792 | 0.4740236501  |
| H5 | -2.8308074044 | -0.8034013341 | 0.5669501175  |
| H6 | -2.3540883834 | 0.9003145998  | 0.4174480503  |

<sup>6</sup> Zhao, Y.; Truhlar, D. G. *Acc. Chem. Res.* **2008**, *41*, 157–167.

<sup>7</sup> Jaguar 7.6, Schrodinger, LLC, New York, NY (2006).

<sup>8</sup> Krishnan, R.; Binkley, J. S.; Seeger, R.; Pople, J. A. *J. Chem. Phys.* **1980**, *72*, 650–654.

<sup>9</sup> Frisch, M. J.; Pople, J. A.; Binkley, J. S. *J. Chem. Phys.* **1984**, *80*, 3265–3269.

<sup>10</sup> Tannor, D. J. *et al. J. Am. Chem. Soc.* **1994**, *116*, 11875–11882.



|     |               |               |               |
|-----|---------------|---------------|---------------|
| C7  | -0.9101291131 | -0.3141719060 | 1.5431631388  |
| H8  | -0.8846836959 | -1.3571032635 | 1.8858461081  |
| H9  | -1.0378799858 | 0.3266025933  | 2.4205641683  |
| O10 | -1.6216317749 | -0.8573177773 | -1.8508472589 |
| C11 | 1.1276776935  | -0.9879096489 | -1.2199633151 |
| H12 | 0.9323228314  | -2.0514103371 | -1.3565655316 |
| C13 | 0.8690796013  | 1.3507877266  | 1.1437732540  |
| H14 | 0.9263144317  | 1.3771280074  | 2.2397164443  |
| C15 | 2.3430695852  | 1.5253015423  | 0.6993170597  |
| C16 | 2.6215569430  | 1.8710876864  | -0.7484982112 |
| C17 | 2.5739524168  | 0.9909642441  | -1.7680643115 |
| C18 | 2.2277275314  | -0.4325971828 | -1.7237735580 |
| H19 | 2.9116435086  | -1.0814038837 | -2.2686316108 |
| C20 | 2.9501435522  | 1.3660067272  | -3.1687516991 |
| O21 | 3.7294870534  | 0.7445928438  | -3.8508395658 |
| O22 | 2.2592067520  | 2.4281892294  | -3.6236345489 |
| C23 | 3.2007938195  | 0.3883373481  | 1.2407654012  |
| O24 | 3.9672842099  | -0.2992631190 | 0.6190012646  |
| O25 | 3.0396421853  | 0.2961539362  | 2.5743356522  |
| C26 | 2.5275667791  | 2.7739395837  | -4.9815547411 |
| H27 | 1.8913714033  | 3.6307799163  | -5.2058318357 |
| H28 | 2.2905063328  | 1.9367290141  | -5.6443874650 |
| H29 | 3.5818617197  | 3.0333727351  | -5.1164636446 |

|     |               |               |               |
|-----|---------------|---------------|---------------|
| C30 | 3.7989547160  | -0.7350564948 | 3.1973333267  |
| H31 | 4.8698820304  | -0.5787098271 | 3.0370167051  |
| H32 | 3.5264367917  | -1.7128589244 | 2.7896011572  |
| H33 | 3.5621846538  | -0.6860534513 | 4.2609810648  |
| C34 | -0.0566968682 | 2.4716515807  | 0.7228785008  |
| C35 | -1.9395778385 | 4.4555885860  | 0.0907514891  |
| C36 | -0.7156794239 | 3.1876889779  | 1.7259043365  |
| C37 | -0.3461036840 | 2.7815588957  | -0.6125780267 |
| C38 | -1.2812567431 | 3.7626711262  | -0.9195784035 |
| C39 | -1.6488999452 | 4.1705388986  | 1.4189069379  |
| H40 | -0.4938019799 | 2.9647679446  | 2.7702216173  |
| H41 | 0.1551969003  | 2.2537055907  | -1.4193570268 |
| H42 | -1.4986816020 | 3.9836742806  | -1.9618213351 |
| H43 | -2.1497483766 | 4.7113247464  | 2.2184837138  |
| H44 | -2.6734675789 | 5.2185539788  | -0.1577661394 |
| C45 | 3.0523346821  | 3.2994988505  | -0.9118402040 |
| H46 | 3.9314641106  | 3.4910486308  | -0.2809901290 |
| H47 | 2.2604974920  | 3.9759483826  | -0.5607997775 |
| H48 | 3.2955562502  | 3.5752156205  | -1.9371641415 |
| H49 | 2.6702796530  | 2.4004786688  | 1.2835396399  |

**8b**

|    |              |               |               |
|----|--------------|---------------|---------------|
| N1 | 0.2662000880 | -0.0069175458 | -0.7875658401 |
|----|--------------|---------------|---------------|

|     |               |               |               |
|-----|---------------|---------------|---------------|
| N2  | -0.6394329637 | 0.8296189140  | -1.4791152457 |
| C3  | -1.9673030257 | 0.5575604397  | -1.2651504264 |
| C4  | -2.0101589363 | -0.6036891685 | -0.2903319251 |
| H5  | -2.7707917152 | -1.3237726696 | -0.6019053740 |
| H6  | -2.2870522873 | -0.2231928738 | 0.7016199258  |
| C7  | -0.5836639122 | -1.1388459623 | -0.3580874115 |
| H8  | -0.5047539519 | -1.9271068705 | -1.1180591048 |
| H9  | -0.2108846531 | -1.5411011561 | 0.5879991806  |
| O10 | -2.8890132328 | 1.1406744178  | -1.7984975334 |
| C11 | -0.1680932341 | 1.7758823186  | -2.4772739882 |
| H12 | -1.0204300818 | 1.9605884993  | -3.1392090188 |
| H13 | 0.1031219503  | 2.7329564961  | -2.0022950461 |
| C14 | 0.9623773923  | 0.6872326794  | 0.3120254426  |
| H15 | 1.5379378020  | -0.1035526131 | 0.8198731315  |
| C16 | 1.9987986723  | 1.6936684593  | -0.1658613524 |
| C17 | 2.5866008916  | 1.8502018930  | -1.3666125386 |
| C18 | 2.2189138616  | 1.1321106534  | -2.6128717432 |
| C19 | 1.0056693987  | 1.1864312784  | -3.1773536738 |
| H20 | 0.8607825148  | 0.6698003671  | -4.1241823527 |
| C21 | 3.2474020609  | 0.3382691858  | -3.3460426093 |
| O22 | 3.1241982318  | -0.0938052396 | -4.4690368607 |
| O23 | 4.3335374499  | 0.1083630610  | -2.5855748935 |
| C24 | 2.4867192220  | 2.4767964547  | 1.0125155563  |

|     |               |               |               |
|-----|---------------|---------------|---------------|
| O25 | 2.9631010037  | 1.9734110303  | 2.0027016800  |
| O26 | 2.2682653069  | 3.7951192797  | 0.8796636537  |
| C27 | 5.3341650816  | -0.6979178596 | -3.1991658746 |
| H28 | 6.1356399033  | -0.7952553297 | -2.4661271331 |
| H29 | 5.7060279017  | -0.2266857219 | -4.1139583775 |
| H30 | 4.9309345042  | -1.6813740119 | -3.4582482734 |
| C31 | 2.5621070346  | 4.5647228905  | 2.0438948204  |
| H32 | 3.6102276291  | 4.4515589847  | 2.3356565468  |
| H33 | 1.9297729273  | 4.2391521875  | 2.8768441934  |
| H34 | 2.3466305646  | 5.6016759371  | 1.7841208257  |
| C35 | 0.0188325886  | 1.2830331817  | 1.3389002930  |
| C36 | -1.8708802543 | 2.2272089370  | 3.1737263056  |
| C37 | -0.1769614169 | 0.6329159662  | 2.5576834692  |
| C38 | -0.7183479088 | 2.4382975093  | 1.0675451350  |
| C39 | -1.6638053997 | 2.9010377002  | 1.9752262810  |
| C40 | -1.1159183479 | 1.0972132194  | 3.4699201045  |
| H41 | 0.4256539770  | -0.2439842131 | 2.7952903973  |
| H42 | -0.5533856816 | 2.9833635970  | 0.1395877317  |
| H43 | -2.2423792524 | 3.7917719839  | 1.7429620635  |
| H44 | -1.2565159080 | 0.5783028461  | 4.4151423710  |
| H45 | -2.6127806724 | 2.5891768239  | 3.8815101262  |
| C46 | 3.6616828256  | 2.8857091422  | -1.5865998087 |
| H47 | 4.1766355302  | 3.1742042884  | -0.6681035864 |

|     |              |              |               |
|-----|--------------|--------------|---------------|
| H48 | 3.2197433392 | 3.7914685669 | -2.0211522025 |
| H49 | 4.4142779093 | 2.5199423295 | -2.2902814678 |

**S**

|     |               |               |               |
|-----|---------------|---------------|---------------|
| N1  | -0.2175335147 | -0.3500545364 | -0.2284600502 |
| N2  | -0.7462566069 | 0.2571943091  | -1.4009786481 |
| C3  | -2.1370850888 | 0.3942976746  | -1.3360599596 |
| C4  | -2.5839050336 | -0.1088020834 | 0.0220278215  |
| H5  | -3.5202705984 | -0.6598886395 | -0.0969890741 |
| H6  | -2.7672470768 | 0.7345528585  | 0.6989508593  |
| C7  | -1.3936908878 | -0.9630647130 | 0.4324738512  |
| H8  | -1.5041587948 | -1.9878426675 | 0.0525958743  |
| H9  | -1.2271804652 | -1.0202812802 | 1.5119582333  |
| O10 | -2.8283680370 | 0.7780614587  | -2.2516658684 |
| C11 | -0.1968514395 | -0.1903480167 | -2.6682797940 |
| H12 | -0.1830704649 | -1.2953726526 | -2.6805770623 |
| H13 | -0.9285133207 | 0.1167112591  | -3.4294773099 |
| C14 | 0.4767346804  | 0.6173604669  | 0.6488102475  |
| H15 | 0.7022813755  | 0.0206206487  | 1.5407085683  |
| C16 | 1.8683834573  | 0.9914382695  | 0.0955373885  |
| H17 | 2.2947863560  | 1.6364901879  | 0.8814213528  |
| C18 | 1.9289303526  | 1.7851559499  | -1.1943897732 |
| C19 | 1.9637130835  | 3.1182331783  | -1.1423324513 |

|     |               |               |               |
|-----|---------------|---------------|---------------|
| H20 | 2.0225828032  | 3.7183535625  | -2.0468778348 |
| H21 | 1.9383066798  | 3.6549686562  | -0.1960277917 |
| C22 | 2.0412601494  | 1.0903872417  | -2.5042019195 |
| C23 | 1.1459506543  | 0.2787447012  | -3.0796528354 |
| H24 | 1.4599097795  | -0.1337999672 | -4.0399677902 |
| C25 | 3.3047485869  | 1.2501206643  | -3.2971743721 |
| O26 | 3.5125157045  | 0.7318132374  | -4.3723245840 |
| O27 | 4.2024306085  | 2.0431394283  | -2.6938814362 |
| C28 | 2.7972829091  | -0.2124891692 | 0.0613063019  |
| O29 | 3.5993578400  | -0.4599899304 | -0.8044123733 |
| O30 | 2.6847287942  | -0.9510189820 | 1.1806601466  |
| C31 | 5.4291946104  | 2.1857461222  | -3.3969539618 |
| H32 | 6.0462305373  | 2.8555117290  | -2.7961102595 |
| H33 | 5.2624231524  | 2.6090402159  | -4.3924563161 |
| H34 | 5.9214343632  | 1.2155438591  | -3.5142676980 |
| C35 | 3.5726609099  | -2.0624286603 | 1.2557285018  |
| H36 | 4.6139365608  | -1.7291445604 | 1.2149311587  |
| H37 | 3.3978822486  | -2.7526834148 | 0.4254132001  |
| H38 | 3.3659848570  | -2.5514748259 | 2.2084896496  |
| C39 | -0.3382819064 | 1.8000049851  | 1.1313833645  |
| C40 | -1.9446683704 | 3.8586418296  | 2.1664857147  |
| C41 | -0.6301579635 | 1.8726841321  | 2.4960647268  |
| C42 | -0.8563985734 | 2.7937954008  | 0.2916398916  |

|     |               |              |               |
|-----|---------------|--------------|---------------|
| C43 | -1.6555070088 | 3.8072814572 | 0.8071381198  |
| C44 | -1.4234738583 | 2.8892265890 | 3.0143052469  |
| H45 | -0.2317041441 | 1.1090899588 | 3.1649390510  |
| H46 | -0.6499083483 | 2.7658329313 | -0.7728103238 |
| H47 | -2.0596076752 | 4.5615358563 | 0.1359237128  |
| H48 | -1.6384592225 | 2.9196673051 | 4.0799358865  |
| H49 | -2.5736430245 | 4.6525111765 | 2.5625361438  |
